# Supplementary material
Source: PubMed Central journal article supplement (PMC8275572)
Supplement: 41392_2021_690_MOESM2_ESM.pdf [file 41392_2021_690_MOESM2_ESM.pdf]

**Table S2**

| <b>Gene Symbol</b> | <b>Type</b> | <b>log2 (Atorvastatin / COVID19)</b> | <b>Qvalue (Atorvastatin / COVID19)</b> |
|--------------------|-------------|--------------------------------------|----------------------------------------|
| hsa_circ_0066883   | circRNA     | 9.083313804                          | 7.69E-13                               |
| RAMP3              | mRNA        | 8.925866858                          | 2.79E-07                               |
| hsa_circ_0072384   | circRNA     | 8.526738246                          | 4.83E-13                               |
| hsa_circ_0135692   | circRNA     | 8.303350393                          | 2.88E-12                               |
| hsa_circ_0085509   | circRNA     | 8.287481138                          | 4.32E-12                               |
| hsa_circ_0049378   | circRNA     | 8.229758512                          | 5.85E-12                               |
| hsa_circ_0072392   | circRNA     | 8.204323468                          | 9.44E-12                               |
| hsa_circ_0089104   | circRNA     | 8.196153554                          | 1.37E-11                               |
| PI16               | mRNA        | 8.145641985                          | 4.38E-27                               |
| hsa_circ_0089102   | circRNA     | 8.107429466                          | 2.56E-11                               |
| APLNR              | mRNA        | 7.867697551                          | 1.85E-31                               |
| hsa_circ_0072393   | circRNA     | 7.830739154                          | 4.00E-10                               |
| hsa_circ_0073037   | circRNA     | 7.808261898                          | 3.74E-10                               |
| hsa_circ_0070976   | circRNA     | 7.791303328                          | 1.18E-09                               |
| hsa_circ_0116649   | circRNA     | 7.784870364                          | 4.28E-10                               |
| SLC14A1            | mRNA        | 7.763192517                          | 7.23E-09                               |
| hsa_circ_0023365   | circRNA     | 7.762297632                          | 1.82E-09                               |
| hsa_circ_0085512   | circRNA     | 7.728672812                          | 5.93E-10                               |
| WNT9B              | mRNA        | 7.698851992                          | 1.25E-06                               |
| hsa_circ_0040843   | circRNA     | 7.635098012                          | 5.49E-09                               |
| hsa_circ_0070981   | circRNA     | 7.599829374                          | 1.19E-08                               |

|                  |         |             |          |
|------------------|---------|-------------|----------|
| hsa_circ_0023372 | circRNA | 7.595994783 | 1.16E-08 |
| hsa_circ_0028142 | circRNA | 7.594034488 | 3.58E-09 |
| hsa_circ_0012669 | circRNA | 7.59201594  | 6.69E-09 |
| hsa_circ_0125356 | circRNA | 7.591272793 | 1.70E-08 |
| hsa_circ_0051712 | circRNA | 7.549885726 | 3.51E-08 |
| hsa_circ_0031652 | circRNA | 7.483508909 | 2.41E-08 |
| hsa_circ_0109019 | circRNA | 7.478223235 | 1.09E-08 |
| hsa_circ_0049391 | circRNA | 7.441725803 | 1.90E-08 |
| hsa_circ_0072382 | circRNA | 7.435696138 | 4.74E-08 |
| hsa_circ_0116650 | circRNA | 7.421537259 | 2.55E-08 |
| hsa_circ_0072381 | circRNA | 7.402078669 | 3.73E-08 |
| hsa_circ_0066859 | circRNA | 7.380610606 | 2.78E-07 |
| hsa_circ_0049389 | circRNA | 7.29976685  | 2.17E-07 |
| hsa_circ_0072389 | circRNA | 7.255470769 | 4.09E-07 |
| hsa_circ_0061352 | circRNA | 7.247678705 | 5.07E-07 |
| hsa_circ_0073031 | circRNA | 7.188600206 | 4.52E-07 |
| hsa_circ_0096117 | circRNA | 7.180701662 | 8.77E-07 |
| hsa_circ_0078551 | circRNA | 7.098806625 | 3.02E-06 |
| LYPD2            | mRNA    | 7.072999245 | 6.35E-05 |
| hsa_circ_0049380 | circRNA | 7.046916176 | 3.83E-06 |
| hsa_circ_0022397 | circRNA | 7.032671355 | 4.93E-06 |
| hsa_circ_0078552 | circRNA | 7.026952824 | 6.69E-06 |
| hsa_circ_0012593 | circRNA | 7.02366479  | 4.63E-06 |
| hsa_circ_0063695 | circRNA | 7.016652245 | 8.59E-06 |
| hsa_circ_0049381 | circRNA | 7.010537004 | 5.93E-06 |

|                  |         |             |             |
|------------------|---------|-------------|-------------|
| hsa_circ_0002085 | circRNA | 6.971985546 | 1.24E-05    |
| hsa_circ_0118974 | circRNA | 6.925070823 | 1.77E-05    |
| hsa_circ_0022367 | circRNA | 6.915233098 | 2.74E-05    |
| PTGDS            | mRNA    | 6.902616002 | 1.25E-09    |
| hsa_circ_0059319 | circRNA | 6.853112827 | 7.52E-05    |
| hsa_circ_0046342 | circRNA | 6.838500271 | 6.17E-05    |
| STC1             | mRNA    | 6.822389535 | 5.48E-11    |
| hsa_circ_0012670 | circRNA | 6.819017255 | 9.78E-05    |
| hsa_circ_0057582 | circRNA | 6.813578535 | 8.36E-05    |
| hsa_circ_0133001 | circRNA | 6.811005764 | 9.44E-05    |
| hsa_circ_0046340 | circRNA | 6.796971681 | 1.47E-04    |
| hsa_circ_0107067 | circRNA | 6.785707493 | 1.37E-04    |
| hsa_circ_0046332 | circRNA | 6.763216788 | 1.53E-04    |
| hsa_circ_0129616 | circRNA | 6.761924222 | 1.98E-04    |
| hsa_circ_0043110 | circRNA | 6.756972782 | 1.78E-04    |
| hsa_circ_0065121 | circRNA | 6.755890407 | 1.87E-04    |
| hsa_circ_0092106 | circRNA | 6.743804541 | 2.46E-04    |
| hsa_circ_0116654 | circRNA | 6.730610346 | 3.22E-04    |
| hsa_circ_0129918 | circRNA | 6.724269117 | 3.29E-04    |
| hsa_circ_0131048 | circRNA | 6.723777013 | 2.68E-04    |
| hsa_circ_0045571 | circRNA | 6.71069324  | 3.42E-04    |
| hsa_circ_0124468 | circRNA | 6.701070841 | 0.004041322 |
| hsa_circ_0117982 | circRNA | 6.699063699 | 4.13E-04    |
| hsa_circ_0107790 | circRNA | 6.698432735 | 3.55E-04    |
| hsa_circ_0118846 | circRNA | 6.696773192 | 4.64E-04    |

|                  |         |             |             |
|------------------|---------|-------------|-------------|
| LCN10            | mRNA    | 6.694198338 | 6.35E-05    |
| hsa_circ_0028445 | circRNA | 6.691236751 | 4.54E-04    |
| hsa_circ_0002181 | circRNA | 6.686850363 | 4.36E-04    |
| hsa_circ_0070978 | circRNA | 6.675673616 | 5.09E-04    |
| IGF1             | mRNA    | 6.664789699 | 3.69E-07    |
| hsa_circ_0046367 | circRNA | 6.664497147 | 5.23E-04    |
| hsa_circ_0038969 | circRNA | 6.6641317   | 5.66E-04    |
| hsa_circ_0131084 | circRNA | 6.656909731 | 0.005570055 |
| hsa_circ_0066657 | circRNA | 6.647026469 | 6.20E-04    |
| hsa_circ_0052593 | circRNA | 6.613411011 | 9.51E-04    |
| hsa_circ_0057590 | circRNA | 6.613131451 | 0.00104695  |
| hsa_circ_0031927 | circRNA | 6.59164838  | 0.010295267 |
| hsa_circ_0008590 | circRNA | 6.589817811 | 0.001571234 |
| hsa_circ_0109373 | circRNA | 6.589260705 | 0.009295291 |
| hsa_circ_0022366 | circRNA | 6.586751688 | 0.001298463 |
| hsa_circ_0129615 | circRNA | 6.584968901 | 0.001404631 |
| hsa_circ_0034616 | circRNA | 6.583569732 | 0.009992095 |
| hsa_circ_0127504 | circRNA | 6.581330361 | 0.001484661 |
| hsa_circ_0039944 | circRNA | 6.579267997 | 0.001369657 |
| hsa_circ_0046355 | circRNA | 6.569620247 | 0.001662903 |
| hsa_circ_0130814 | circRNA | 6.568142143 | 0.002124251 |
| hsa_circ_0028437 | circRNA | 6.549438192 | 0.002106136 |
| hsa_circ_0053500 | circRNA | 6.548387716 | 0.002069243 |
| hsa_circ_0111787 | circRNA | 6.543767608 | 0.002020602 |
| hsa_circ_0137215 | circRNA | 6.537392898 | 0.013247105 |

|                  |         |             |             |
|------------------|---------|-------------|-------------|
| hsa_circ_0137482 | circRNA | 6.528133082 | 0.002611907 |
| hsa_circ_0083344 | circRNA | 6.525105373 | 0.014553601 |
| hsa_circ_0026237 | circRNA | 6.506300994 | 0.00310414  |
| hsa_circ_0093008 | circRNA | 6.49935351  | 0.017012251 |
| hsa_circ_0058444 | circRNA | 6.497303705 | 0.003478101 |
| hsa_circ_0033063 | circRNA | 6.493846978 | 0.003282839 |
| hsa_circ_0106694 | circRNA | 6.49273739  | 0.003396258 |
| hsa_circ_0084075 | circRNA | 6.48596917  | 0.003707153 |
| hsa_circ_0066441 | circRNA | 6.484125184 | 0.020162475 |
| hsa_circ_0029323 | circRNA | 6.48320037  | 0.004049817 |
| hsa_circ_0027962 | circRNA | 6.475466945 | 0.021441401 |
| hsa_circ_0024108 | circRNA | 6.475070197 | 0.02046482  |
| hsa_circ_0137969 | circRNA | 6.473629877 | 0.004185228 |
| hsa_circ_0094045 | circRNA | 6.473463406 | 0.004084694 |
| hsa_circ_0048492 | circRNA | 6.466008306 | 0.00435372  |
| hsa_circ_0083346 | circRNA | 6.463159134 | 0.004470026 |
| hsa_circ_0095127 | circRNA | 6.460432011 | 0.005008875 |
| hsa_circ_0073769 | circRNA | 6.457878827 | 0.004648741 |
| hsa_circ_0054578 | circRNA | 6.450167518 | 0.024214353 |
| hsa_circ_0118847 | circRNA | 6.449013238 | 0.006221082 |
| hsa_circ_0106702 | circRNA | 6.447578747 | 0.005098241 |
| hsa_circ_0083082 | circRNA | 6.433186476 | 0.006256371 |
| hsa_circ_0064432 | circRNA | 6.432567778 | 0.027365877 |
| hsa_circ_0002884 | circRNA | 6.418564289 | 0.029231486 |
| hsa_circ_0006617 | circRNA | 6.415247259 | 0.006744034 |

|                  |         |             |             |
|------------------|---------|-------------|-------------|
| ACKR1            | mRNA    | 6.405625909 | 3.15E-20    |
| hsa_circ_0040083 | circRNA | 6.404874618 | 0.031239515 |
| hsa_circ_0069416 | circRNA | 6.395269302 | 0.008580363 |
| hsa_circ_0046334 | circRNA | 6.385752836 | 0.008693714 |
| hsa_circ_0062443 | circRNA | 6.3850174   | 0.008595462 |
| hsa_circ_0053294 | circRNA | 6.382779423 | 0.008720533 |
| hsa_circ_0123831 | circRNA | 6.374394725 | 0.009578232 |
| hsa_circ_0071639 | circRNA | 6.366427979 | 0.010837734 |
| hsa_circ_0002609 | circRNA | 6.364924672 | 0.038984901 |
| hsa_circ_0045688 | circRNA | 6.361630963 | 0.010885303 |
| hsa_circ_0064431 | circRNA | 6.361505201 | 0.040855585 |
| hsa_circ_0070578 | circRNA | 6.358991961 | 0.040426358 |
| hsa_circ_0113629 | circRNA | 6.34856351  | 0.041775448 |
| hsa_circ_0138041 | circRNA | 6.347859441 | 0.042030674 |
| hsa_circ_0064435 | circRNA | 6.335605612 | 0.046089535 |
| LTF              | mRNA    | 6.333641055 | 8.42E-06    |
| hsa_circ_0089106 | circRNA | 6.329831797 | 0.048006277 |
| hsa_circ_0110590 | circRNA | 6.329501266 | 0.014078056 |
| hsa_circ_0098456 | circRNA | 6.317577709 | 0.015381553 |
| hsa_circ_0032102 | circRNA | 6.312232659 | 0.015059445 |
| hsa_circ_0116147 | circRNA | 6.306139327 | 0.015693019 |
| hsa_circ_0085662 | circRNA | 6.295930514 | 0.016924811 |
| hsa_circ_0046348 | circRNA | 6.295013472 | 0.017959634 |
| hsa_circ_0035461 | circRNA | 6.284821108 | 0.018389717 |
| hsa_circ_0105248 | circRNA | 6.276998017 | 0.01971967  |

|                  |         |             |             |
|------------------|---------|-------------|-------------|
| hsa_circ_0131063 | circRNA | 6.262576506 | 0.022216785 |
| hsa_circ_0071129 | circRNA | 6.258666876 | 0.022357021 |
| hsa_circ_0067191 | circRNA | 6.257391644 | 0.022357021 |
| hsa_circ_0057577 | circRNA | 6.253034626 | 0.024176646 |
| hsa_circ_0028792 | circRNA | 6.251848297 | 0.02290569  |
| hsa_circ_0060181 | circRNA | 6.25122002  | 0.023841572 |
| hsa_circ_0039433 | circRNA | 6.245305059 | 0.023824715 |
| hsa_circ_0016161 | circRNA | 6.243543322 | 0.026240322 |
| hsa_circ_0019030 | circRNA | 6.235019826 | 0.025915174 |
| hsa_circ_0087971 | circRNA | 6.227533525 | 0.027441597 |
| hsa_circ_0043732 | circRNA | 6.22274795  | 0.027585818 |
| hsa_circ_0070240 | circRNA | 6.197768076 | 0.032185139 |
| hsa_circ_0127822 | circRNA | 6.192619636 | 0.034397993 |
| FLJ30901         | lncRNA  | 6.18267235  | 5.41E-11    |
| hsa_circ_0100817 | circRNA | 6.178952433 | 0.037292408 |
| hsa_circ_0080613 | circRNA | 6.172916055 | 0.038709216 |
| hsa_circ_0042028 | circRNA | 6.167708661 | 0.038431808 |
| hsa_circ_0104007 | circRNA | 6.163855099 | 0.040228232 |
| hsa_circ_0067085 | circRNA | 6.16350288  | 0.040295251 |
| hsa_circ_0036812 | circRNA | 6.149538137 | 0.043187929 |
| hsa_circ_0046343 | circRNA | 6.149149681 | 0.042481448 |
| hsa_circ_0118463 | circRNA | 6.12950106  | 0.04921866  |
| LOC107987447     | lncRNA  | 6.089936014 | 4.10E-05    |
| FER1L6           | mRNA    | 6.020087519 | 4.26E-04    |
| NPPC             | mRNA    | 5.959658032 | 7.58E-04    |

|                |        |             |             |
|----------------|--------|-------------|-------------|
| FCN3           | mRNA   | 5.905745871 | 1.21E-47    |
| UNC13A         | mRNA   | 5.8779293   | 3.82E-19    |
| BGIG9606_55309 | mRNA   | 5.748190236 | 0.010460485 |
| BGIG9606_45895 | lncRNA | 5.74765346  | 2.16E-04    |
| CMKLR1         | mRNA   | 5.723639372 | 4.96E-43    |
| PLA1A          | mRNA   | 5.571471834 | 2.57E-44    |
| CADM3-AS1      | lncRNA | 5.557426214 | 1.91E-04    |
| NPNT           | mRNA   | 5.416559293 | 6.91E-07    |
| KCNK3          | mRNA   | 5.318790144 | 0.023295447 |
| SCUBE1         | mRNA   | 5.245141605 | 6.12E-33    |
| LOC100128593   | lncRNA | 5.238802407 | 2.68E-04    |
| BGIG9606_40064 | lncRNA | 4.924924352 | 0.016093354 |
| LOC105369309   | lncRNA | 4.918318651 | 0.0011185   |
| ABCC3          | mRNA   | 4.883065113 | 2.60E-17    |
| GJA9-MYCBP     | lncRNA | 4.804527348 | 0.029976676 |
| RASD1          | mRNA   | 4.791766877 | 1.00E-10    |
| WFDC1          | mRNA   | 4.756248466 | 9.20E-04    |
| LOC107984376   | lncRNA | 4.756239216 | 0.005987723 |
| LCN6           | mRNA   | 4.686437158 | 0.002063913 |
| PLA2G3         | mRNA   | 4.553097596 | 5.74E-05    |
| CRP            | mRNA   | 4.548003487 | 0.015489828 |
| CADM3          | mRNA   | 4.533335014 | 1.86E-04    |
| LUCAT1         | lncRNA | 4.532924402 | 8.33E-12    |
| BGIG9606_45098 | lncRNA | 4.471173636 | 0.034470492 |
| CDHR1          | mRNA   | 4.374093204 | 4.38E-12    |



|                  |         |             |             |
|------------------|---------|-------------|-------------|
| MYOM3            | mRNA    | 4.288995898 | 3.31E-15    |
| LOC107984751     | mRNA    | 4.280109267 | 0.009225594 |
| NDNF             | mRNA    | 4.271552693 | 0.025778246 |
| LINC01249        | lncRNA  | 4.206672528 | 0.019327101 |
| LOC107987228     | lncRNA  | 4.199694993 | 0.001832557 |
| PCSK9            | mRNA    | 4.193824491 | 3.08E-14    |
| BGIG9606_54754   | mRNA    | 4.193503739 | 4.49E-04    |
| TH               | mRNA    | 4.160536714 | 0.018756284 |
| FABP3            | mRNA    | 4.128364717 | 2.23E-10    |
| ZBTB7C           | mRNA    | 4.117783506 | 0.048178219 |
| TNXB             | mRNA    | 4.088689942 | 2.12E-23    |
| NGEF             | mRNA    | 4.088676706 | 0.010512338 |
| LINC02561        | lncRNA  | 4.088192916 | 1.75E-05    |
| BGIG9606_40936   | lncRNA  | 4.087425289 | 0.001050554 |
| KCNN2            | mRNA    | 4.071623741 | 6.69E-08    |
| LOC105379030     | lncRNA  | 4.061188595 | 0.031214559 |
| PMCH             | mRNA    | 4.020600158 | 1.34E-04    |
| L1CAM            | mRNA    | 4.005309409 | 1.49E-04    |
| hsa_circ_0049394 | circRNA | 3.963303758 | 0.018809734 |
| KCNN4            | mRNA    | 3.938601739 | 2.09E-04    |
| LYPD5            | mRNA    | 3.849004499 | 6.22E-05    |
| S100P            | mRNA    | 3.842598127 | 3.97E-04    |
| CABP1            | mRNA    | 3.818310838 | 0.006128309 |
| ST6GALNAC1       | mRNA    | 3.732560597 | 3.72E-10    |
| NOV              | mRNA    | 3.72644178  | 2.36E-06    |

|                  |         |             |             |
|------------------|---------|-------------|-------------|
| hsa_circ_0031929 | circRNA | 3.703204264 | 0.018256487 |
| TMEM151A         | mRNA    | 3.66035722  | 6.68E-04    |
| TESC             | mRNA    | 3.558648267 | 7.34E-09    |
| NMRAL2P          | pseudo  | 3.551345543 | 7.40E-06    |
| ADM2             | mRNA    | 3.535737748 | 2.36E-10    |
| BGIG9606_44938   | lncRNA  | 3.529406909 | 0.03523272  |
| BGIG9606_56233   | lncRNA  | 3.525021052 | 2.83E-08    |
| IGFBP5           | mRNA    | 3.515908965 | 1.99E-05    |
| PTPRR            | mRNA    | 3.475979046 | 0.011147833 |
| hsa_circ_0072391 | circRNA | 3.419949605 | 6.19E-35    |
| hsa_circ_0049382 | circRNA | 3.414432897 | 5.21E-04    |
| PNPLA3           | mRNA    | 3.386399611 | 2.17E-14    |
| NID2             | mRNA    | 3.361663951 | 2.11E-04    |
| CFP              | mRNA    | 3.361391696 | 5.80E-21    |
| COL17A1          | mRNA    | 3.358459822 | 9.29E-06    |
| HMGCS1           | mRNA    | 3.345856079 | 3.48E-42    |
| JPH4             | mRNA    | 3.328612533 | 9.83E-11    |
| CCL21            | mRNA    | 3.327092203 | 3.28E-04    |
| NQO1             | mRNA    | 3.32047543  | 7.02E-19    |
| AQP3             | mRNA    | 3.314165929 | 0.001453929 |
| hsa_circ_0125714 | circRNA | 3.306658437 | 0.008418521 |
| ACP5             | mRNA    | 3.280432852 | 4.44E-18    |
| CFAP161          | mRNA    | 3.273040884 | 2.53E-07    |
| hsa_circ_0073041 | circRNA | 3.253202164 | 1.23E-06    |
| hsa_circ_0004983 | circRNA | 3.242963082 | 1.60E-11    |

|                  |         |             |             |
|------------------|---------|-------------|-------------|
| CDH23            | mRNA    | 3.239253686 | 2.70E-14    |
| SLCO4C1          | mRNA    | 3.231790645 | 0.01646804  |
| hsa_circ_0012671 | circRNA | 3.201038683 | 7.10E-12    |
| ADAP2            | mRNA    | 3.198156796 | 2.48E-07    |
| hsa_circ_0129088 | circRNA | 3.185094552 | 0.004514168 |
| hsa_circ_0133744 | circRNA | 3.174720787 | 1.91E-42    |
| LOC100505664     | lncRNA  | 3.151962872 | 1.04E-05    |
| hsa_circ_0040084 | circRNA | 3.151075095 | 3.76E-11    |
| IDI2-AS1         | lncRNA  | 3.150859335 | 2.83E-08    |
| BGIG9606_45664   | lncRNA  | 3.130420554 | 0.004582272 |
| hsa_circ_0002579 | circRNA | 3.130080279 | 6.51E-57    |
| LYVE1            | mRNA    | 3.114952004 | 5.59E-05    |
| ADAMTS5          | mRNA    | 3.098151683 | 9.31E-04    |
| LDLR             | mRNA    | 3.086425925 | 2.35E-28    |
| hsa_circ_0085513 | circRNA | 3.082928109 | 0.005281932 |
| ALPL             | mRNA    | 3.074250457 | 1.06E-05    |
| INSIG1           | mRNA    | 3.071876309 | 1.05E-40    |
| LINC00482        | lncRNA  | 3.070293533 | 0.029406003 |
| ADAMTS4          | mRNA    | 3.067846022 | 1.93E-06    |
| hsa_circ_0070980 | circRNA | 3.066167344 | 0.00701421  |
| hsa_circ_0023377 | circRNA | 3.058825279 | 3.39E-38    |
| BAALC            | mRNA    | 3.030166518 | 8.55E-11    |
| hsa_circ_0049383 | circRNA | 3.019900782 | 3.03E-23    |
| hsa_circ_0072387 | circRNA | 3.002544452 | 0.003635015 |
| hsa_circ_0049398 | circRNA | 2.993451997 | 3.26E-12    |

|                  |         |             |             |
|------------------|---------|-------------|-------------|
| IZUMO1           | mRNA    | 2.981450511 | 0.049030995 |
| hsa_circ_0023375 | circRNA | 2.981290404 | 8.04E-36    |
| hsa_circ_0131233 | circRNA | 2.97565799  | 4.06E-09    |
| hsa_circ_0083081 | circRNA | 2.959294362 | 1.01E-17    |
| hsa_circ_0049393 | circRNA | 2.956038583 | 1.02E-13    |
| hsa_circ_0023374 | circRNA | 2.92548462  | 1.80E-44    |
| hsa_circ_0008621 | circRNA | 2.919675443 | 4.04E-27    |
| hsa_circ_0023376 | circRNA | 2.912899444 | 3.46E-11    |
| HDAC9            | mRNA    | 2.910441221 | 6.98E-10    |
| ADAMTS1          | mRNA    | 2.909820903 | 7.35E-13    |
| hsa_circ_0023370 | circRNA | 2.909644316 | 1.28E-15    |
| hsa_circ_0049395 | circRNA | 2.899830122 | 5.91E-10    |
| hsa_circ_0003892 | circRNA | 2.897805556 | 0.001317067 |
| MYOZ2            | mRNA    | 2.896573923 | 0.001752416 |
| hsa_circ_0049377 | circRNA | 2.894889289 | 9.96E-08    |
| hsa_circ_0012673 | circRNA | 2.887780037 | 3.28E-12    |
| hsa_circ_0133745 | circRNA | 2.884419887 | 1.62E-53    |
| hsa_circ_0023371 | circRNA | 2.883167844 | 5.94E-08    |
| hsa_circ_0049379 | circRNA | 2.882599247 | 0.009673898 |
| hsa_circ_0070975 | circRNA | 2.876274913 | 2.10E-11    |
| hsa_circ_0023369 | circRNA | 2.869198636 | 6.07E-47    |
| hsa_circ_0049400 | circRNA | 2.868665246 | 2.08E-13    |
| ACAT2            | mRNA    | 2.85759713  | 3.17E-24    |
| hsa_circ_0005360 | circRNA | 2.854094383 | 1.73E-30    |
| DHCR24           | mRNA    | 2.853053153 | 1.08E-27    |

|                  |         |             |             |
|------------------|---------|-------------|-------------|
| hsa_circ_0012676 | circRNA | 2.853023723 | 7.26E-14    |
| MSMO1            | mRNA    | 2.849810327 | 8.13E-49    |
| LAMA1            | mRNA    | 2.846013797 | 8.15E-04    |
| BGIG9606_38124   | lncRNA  | 2.83753143  | 7.55E-04    |
| LOC102723825     | lncRNA  | 2.830354424 | 0.03787044  |
| hsa_circ_0012668 | circRNA | 2.828101844 | 7.12E-09    |
| RASGRF2          | mRNA    | 2.825856914 | 0.012525889 |
| hsa_circ_0049385 | circRNA | 2.823990983 | 9.19E-11    |
| hsa_circ_0078553 | circRNA | 2.815558529 | 1.40E-20    |
| hsa_circ_0006877 | circRNA | 2.805639712 | 8.50E-47    |
| hsa_circ_0022395 | circRNA | 2.804675088 | 1.46E-20    |
| CBFA2T3          | mRNA    | 2.803512655 | 0.002297853 |
| hsa_circ_0129619 | circRNA | 2.799459757 | 1.17E-55    |
| WI2-87327B8.2    | lncRNA  | 2.78907871  | 0.007014026 |
| hsa_circ_0000313 | circRNA | 2.785716035 | 1.91E-42    |
| GPR132           | mRNA    | 2.783164723 | 2.93E-04    |
| hsa_circ_0135694 | circRNA | 2.775361454 | 1.18E-45    |
| SQLE             | mRNA    | 2.762637546 | 5.28E-47    |
| hsa_circ_0049390 | circRNA | 2.759767972 | 7.35E-21    |
| KLF4             | mRNA    | 2.754839195 | 7.07E-12    |
| hsa_circ_0022391 | circRNA | 2.741043617 | 1.38E-18    |
| SH3TC2           | mRNA    | 2.738129278 | 2.62E-24    |
| AREG             | mRNA    | 2.733441421 | 0.005987723 |
| ZNF503-AS1       | lncRNA  | 2.728291993 | 0.020555793 |
| LOC105378180     | lncRNA  | 2.728139558 | 0.028955737 |

|                  |         |             |             |
|------------------|---------|-------------|-------------|
| PTPRH            | mRNA    | 2.723678976 | 6.07E-04    |
| LOC101929583     | pseudo  | 2.723587695 | 0.006990852 |
| hsa_circ_0113656 | circRNA | 2.708382694 | 1.32E-15    |
| hsa_circ_0135693 | circRNA | 2.704168113 | 1.71E-54    |
| DHCR7            | mRNA    | 2.68932297  | 4.05E-31    |
| hsa_circ_0073036 | circRNA | 2.688555107 | 1.06E-12    |
| hsa_circ_0022382 | circRNA | 2.686478413 | 9.92E-16    |
| hsa_circ_0049392 | circRNA | 2.672599884 | 1.33E-09    |
| SLC7A11          | mRNA    | 2.661284471 | 1.13E-12    |
| NEURL1B          | mRNA    | 2.659905062 | 4.82E-49    |
| C17orf107        | mRNA    | 2.653389113 | 6.07E-09    |
| F2RL3            | mRNA    | 2.650882918 | 0.036868119 |
| hsa_circ_0129618 | circRNA | 2.633198636 | 4.88E-16    |
| FADS2            | mRNA    | 2.629920274 | 2.20E-34    |
| RIMBP3           | mRNA    | 2.624212264 | 2.49E-04    |
| LOC102724297     | lncRNA  | 2.620585483 | 1.07E-04    |
| NOSTRIN          | mRNA    | 2.614832558 | 1.60E-08    |
| SLC12A8          | mRNA    | 2.614167985 | 1.06E-05    |
| hsa_circ_0022392 | circRNA | 2.603133927 | 6.76E-45    |
| PLAC9            | mRNA    | 2.602059371 | 1.06E-11    |
| OSGIN1           | mRNA    | 2.600251801 | 5.66E-10    |
| PCDH12           | mRNA    | 2.598570881 | 1.00E-10    |
| hsa_circ_0096042 | circRNA | 2.5959774   | 7.60E-62    |
| LINC02544        | lncRNA  | 2.595907274 | 4.26E-04    |
| KLF2             | mRNA    | 2.593022216 | 3.53E-10    |

|                  |         |             |             |
|------------------|---------|-------------|-------------|
| hsa_circ_0022393 | circRNA | 2.585800349 | 5.95E-50    |
| hsa_circ_0070979 | circRNA | 2.580872717 | 1.41E-08    |
| hsa_circ_0022384 | circRNA | 2.578911895 | 2.66E-20    |
| FGF18            | mRNA    | 2.576466793 | 0.036444041 |
| hsa_circ_0022388 | circRNA | 2.57311354  | 2.52E-46    |
| hsa_circ_0085510 | circRNA | 2.566168692 | 3.28E-23    |
| hsa_circ_0089103 | circRNA | 2.55584359  | 5.63E-16    |
| hsa_circ_0022386 | circRNA | 2.55338855  | 3.75E-12    |
| hsa_circ_0135691 | circRNA | 2.551043048 | 2.01E-41    |
| EDNRB            | mRNA    | 2.548038342 | 0.001892441 |
| hsa_circ_0099426 | circRNA | 2.542699894 | 0.009138452 |
| hsa_circ_0022394 | circRNA | 2.522464299 | 5.11E-13    |
| LINGO1           | mRNA    | 2.522180708 | 4.64E-09    |
| HMGCR            | mRNA    | 2.516943183 | 5.60E-43    |
| hsa_circ_0089096 | circRNA | 2.516233928 | 5.32E-25    |
| hsa_circ_0125357 | circRNA | 2.515099034 | 1.03E-07    |
| PTHLH            | mRNA    | 2.496689949 | 0.003479776 |
| hsa_circ_0040847 | circRNA | 2.495044342 | 1.98E-10    |
| hsa_circ_0089100 | circRNA | 2.492948387 | 2.07E-14    |
| ANO1             | mRNA    | 2.483147883 | 3.91E-04    |
| PLA2G4C          | mRNA    | 2.47800204  | 0.00166192  |
| CLIC5            | mRNA    | 2.476139666 | 8.86E-05    |
| FGR              | mRNA    | 2.463690361 | 3.35E-05    |
| hsa_circ_0109760 | circRNA | 2.461190435 | 0.01920531  |
| hsa_circ_0073039 | circRNA | 2.437717883 | 2.69E-50    |

|                  |         |             |             |
|------------------|---------|-------------|-------------|
| BGIG9606_37996   | lncRNA  | 2.436693286 | 3.63E-17    |
| hsa_circ_0070972 | circRNA | 2.432974106 | 1.38E-05    |
| hsa_circ_0014480 | circRNA | 2.423288198 | 7.66E-14    |
| hsa_circ_0051709 | circRNA | 2.42030737  | 0.001861979 |
| LOC286297        | pseudo  | 2.404782684 | 0.021262491 |
| hsa_circ_0070977 | circRNA | 2.399778638 | 4.58E-08    |
| LINC00632        | lncRNA  | 2.399697898 | 1.50E-08    |
| CYP51A1          | mRNA    | 2.397903554 | 1.17E-37    |
| TNIP3            | mRNA    | 2.39602193  | 0.01496164  |
| GCKR             | mRNA    | 2.393637931 | 3.31E-04    |
| hsa_circ_0080999 | circRNA | 2.392622895 | 2.02E-34    |
| hsa_circ_0073042 | circRNA | 2.390232536 | 1.21E-32    |
| PCSK6            | mRNA    | 2.389517622 | 0.005471176 |
| LOC101927834     | lncRNA  | 2.384380835 | 0.019869217 |
| hsa_circ_0046358 | circRNA | 2.382099493 | 4.41E-15    |
| hsa_circ_0073040 | circRNA | 2.376163369 | 1.31E-08    |
| hsa_circ_0070971 | circRNA | 2.370096669 | 1.40E-04    |
| SULT1A3          | mRNA    | 2.351915105 | 2.12E-06    |
| KITLG            | mRNA    | 2.350566792 | 0.001616193 |
| hsa_circ_0022383 | circRNA | 2.348311195 | 4.25E-09    |
| GP6              | mRNA    | 2.340941654 | 2.13E-04    |
| ASS1             | mRNA    | 2.329405723 | 2.14E-19    |
| HES2             | mRNA    | 2.328499662 | 1.79E-07    |
| hsa_circ_0014481 | circRNA | 2.320173485 | 6.22E-14    |
| PCAT1            | lncRNA  | 2.320016069 | 5.57E-04    |



|                  |         |             |             |
|------------------|---------|-------------|-------------|
| KCNMB1           | mRNA    | 2.297423723 | 0.003330702 |
| LINC00520        | lncRNA  | 2.29629799  | 0.002928337 |
| MVD              | mRNA    | 2.294506504 | 3.00E-17    |
| hsa_circ_0073032 | circRNA | 2.294341759 | 4.60E-26    |
| hsa_circ_0081002 | circRNA | 2.293749909 | 1.33E-09    |
| IL16             | mRNA    | 2.287708626 | 1.57E-08    |
| hsa_circ_0073033 | circRNA | 2.276438124 | 5.72E-06    |
| LOC101929951     | lncRNA  | 2.266833499 | 0.042012212 |
| STOX2            | mRNA    | 2.262479198 | 9.03E-37    |
| EBF1             | mRNA    | 2.259530801 | 9.20E-04    |
| MIR4697HG        | lncRNA  | 2.256719882 | 0.027492506 |
| MALL             | mRNA    | 2.24589092  | 3.65E-09    |
| LOC100996351     | lncRNA  | 2.232970023 | 9.69E-04    |
| hsa_circ_0046345 | circRNA | 2.232872298 | 1.34E-05    |
| LOC101928561     | lncRNA  | 2.23062645  | 0.027327496 |
| hsa_circ_0040845 | circRNA | 2.230459434 | 7.92E-07    |
| ECM1             | mRNA    | 2.223044715 | 3.27E-10    |
| hsa_circ_0081000 | circRNA | 2.221761174 | 6.75E-28    |
| ATF3             | mRNA    | 2.219352987 | 6.59E-11    |
| LOC100287846     | lncRNA  | 2.21827701  | 0.037313007 |
| hsa_circ_0081001 | circRNA | 2.210312651 | 1.90E-33    |
| C3orf36          | lncRNA  | 2.205231313 | 0.005077536 |
| hsa_circ_0056017 | circRNA | 2.182367754 | 2.68E-05    |
| MEI1             | mRNA    | 2.181679442 | 1.14E-08    |
| LOC105369724     | lncRNA  | 2.173715178 | 0.012645233 |

|                  |         |             |             |
|------------------|---------|-------------|-------------|
| hsa_circ_0046366 | circRNA | 2.167922988 | 6.37E-17    |
| RASGRP3          | mRNA    | 2.166991213 | 1.42E-06    |
| BGIG9606_52209   | lncRNA  | 2.163313043 | 4.71E-04    |
| SLCO4A1          | mRNA    | 2.161042467 | 2.17E-10    |
| ATP10A           | mRNA    | 2.149314259 | 0.012344135 |
| CAPN14           | mRNA    | 2.147462815 | 4.90E-04    |
| PTAFR            | mRNA    | 2.142183153 | 0.001616537 |
| MYLK             | mRNA    | 2.138563995 | 2.76E-10    |
| LOC107984440     | lncRNA  | 2.133889737 | 0.02831667  |
| hsa_circ_0083347 | circRNA | 2.133064101 | 7.91E-36    |
| hsa_circ_0046327 | circRNA | 2.132798539 | 1.38E-18    |
| SYT7             | mRNA    | 2.129080237 | 3.42E-11    |
| SHISAL1          | mRNA    | 2.128917589 | 0.01599232  |
| hsa_circ_0067047 | circRNA | 2.1277809   | 4.78E-04    |
| LINC00346        | lncRNA  | 2.123508005 | 5.21E-07    |
| hsa_circ_0110857 | circRNA | 2.119439668 | 5.17E-14    |
| LRRC73           | mRNA    | 2.110449347 | 1.42E-06    |
| DUSP8            | mRNA    | 2.108502159 | 4.22E-06    |
| IDI1             | mRNA    | 2.105366595 | 3.60E-26    |
| hsa_circ_0062067 | circRNA | 2.102128968 | 3.20E-07    |
| APOLD1           | mRNA    | 2.098455555 | 0.007524731 |
| hsa_circ_0135551 | circRNA | 2.088301303 | 2.32E-16    |
| hsa_circ_0083349 | circRNA | 2.08805601  | 3.60E-23    |
| hsa_circ_0062068 | circRNA | 2.083172967 | 8.38E-06    |
| hsa_circ_0022378 | circRNA | 2.078611515 | 3.23E-22    |

|                  |         |             |             |
|------------------|---------|-------------|-------------|
| hsa_circ_0083345 | circRNA | 2.077628574 | 4.27E-08    |
| B4GALNT1         | mRNA    | 2.077512024 | 0.010504764 |
| hsa_circ_0046346 | circRNA | 2.077363344 | 1.88E-11    |
| hsa_circ_0089101 | circRNA | 2.077044505 | 3.25E-17    |
| hsa_circ_0046360 | circRNA | 2.072788292 | 3.88E-13    |
| FDFT1            | mRNA    | 2.072667714 | 1.05E-27    |
| IGSF9B           | mRNA    | 2.071645951 | 2.72E-04    |
| hsa_circ_0046352 | circRNA | 2.070844065 | 3.79E-05    |
| FASN             | mRNA    | 2.068286024 | 3.39E-25    |
| LOC105375591     | lncRNA  | 2.067964721 | 4.34E-21    |
| LOC105374062     | lncRNA  | 2.06444735  | 0.046864188 |
| MRV1             | mRNA    | 2.056870982 | 3.88E-08    |
| TFF3             | mRNA    | 2.055419697 | 9.92E-10    |
| NR4A1            | mRNA    | 2.053464007 | 2.92E-05    |
| IL32             | mRNA    | 2.050795833 | 7.72E-06    |
| hsa_circ_0046353 | circRNA | 2.047828461 | 2.20E-06    |
| hsa_circ_0022380 | circRNA | 2.043520877 | 8.66E-20    |
| LSS              | mRNA    | 2.030938273 | 1.57E-12    |
| ELOVL6           | mRNA    | 2.027838919 | 3.29E-14    |
| MMAB             | mRNA    | 2.026923435 | 3.17E-24    |
| hsa_circ_0046370 | circRNA | 2.019547103 | 4.76E-10    |
| hsa_circ_0046341 | circRNA | 2.013816117 | 3.75E-23    |
| HSPA12B          | mRNA    | 2.013800369 | 3.75E-11    |
| FERMT3           | mRNA    | 2.013627825 | 2.84E-06    |
| BDKRB2           | mRNA    | 2.013318678 | 0.02180423  |

|                  |         |             |             |
|------------------|---------|-------------|-------------|
| hsa_circ_0014479 | circRNA | 2.008128062 | 2.56E-05    |
| hsa_circ_0062062 | circRNA | 2.007403661 | 1.21E-07    |
| hsa_circ_0046339 | circRNA | 2.00528733  | 0.001006862 |
| DHCR24-DT        | lncRNA  | 1.991177923 | 0.017989181 |
| hsa_circ_0046359 | circRNA | 1.99100139  | 2.56E-08    |
| NCR3LG1          | mRNA    | 1.989742285 | 1.73E-13    |
| MVK              | mRNA    | 1.988686751 | 3.67E-21    |
| hsa_circ_0057588 | circRNA | 1.986443124 | 0.006921116 |
| ADAMTSL2         | mRNA    | 1.972765712 | 0.004382428 |
| LFNG             | mRNA    | 1.970502258 | 1.60E-08    |
| LOC107984316     | lncRNA  | 1.96943625  | 1.08E-14    |
| TBXA2R           | mRNA    | 1.969047726 | 2.77E-07    |
| hsa_circ_0135548 | circRNA | 1.965716864 | 4.17E-31    |
| TMEM156          | mRNA    | 1.95892511  | 0.008383397 |
| LOC102723911     | lncRNA  | 1.95867826  | 0.036644536 |
| hsa_circ_0022376 | circRNA | 1.956054783 | 2.11E-25    |
| hsa_circ_0083348 | circRNA | 1.93930837  | 1.31E-15    |
| hsa_circ_0135549 | circRNA | 1.921885381 | 1.25E-10    |
| LHX6             | mRNA    | 1.915279242 | 9.50E-07    |
| hsa_circ_0033065 | circRNA | 1.909517739 | 4.56E-21    |
| ISG20            | mRNA    | 1.908130897 | 6.62E-05    |
| hsa_circ_0057571 | circRNA | 1.906765964 | 4.76E-04    |
| IFI27            | mRNA    | 1.906732453 | 9.83E-11    |
| SLC9A3R2         | mRNA    | 1.905867697 | 5.77E-08    |
| RCOR2            | mRNA    | 1.905213837 | 1.23E-05    |

|                  |         |             |             |
|------------------|---------|-------------|-------------|
| hsa_circ_0022381 | circRNA | 1.903749725 | 2.28E-16    |
| TM7SF2           | mRNA    | 1.899155872 | 7.18E-13    |
| hsa_circ_0092118 | circRNA | 1.898627205 | 3.17E-05    |
| hsa_circ_0135550 | circRNA | 1.896383334 | 1.47E-13    |
| BGIG9606_46975   | lncRNA  | 1.89428479  | 0.033623386 |
| GADD45G          | mRNA    | 1.892653289 | 9.94E-04    |
| ALDH3A1          | mRNA    | 1.89227101  | 0.040332505 |
| LTK              | mRNA    | 1.891568636 | 0.040333586 |
| CDCP2            | mRNA    | 1.881532942 | 0.021644815 |
| hsa_circ_0046364 | circRNA | 1.877570644 | 1.16E-08    |
| SLC37A2          | mRNA    | 1.87496736  | 3.45E-04    |
| hsa_circ_0033064 | circRNA | 1.873468601 | 7.16E-05    |
| hsa_circ_0118835 | circRNA | 1.872391205 | 0.00142553  |
| ADAM15           | mRNA    | 1.868034202 | 1.01E-15    |
| ST8SIA6          | mRNA    | 1.864570735 | 8.60E-09    |
| hsa_circ_0097081 | circRNA | 1.863622312 | 0.004978369 |
| hsa_circ_0046368 | circRNA | 1.860521331 | 2.58E-07    |
| hsa_circ_0092396 | circRNA | 1.860409118 | 1.35E-18    |
| PAQR5            | mRNA    | 1.857675713 | 0.00425844  |
| OAS2             | mRNA    | 1.852170701 | 1.63E-06    |
| MMP1             | mRNA    | 1.850763755 | 1.11E-05    |
| hsa_circ_0045690 | circRNA | 1.847974533 | 0.024273142 |
| hsa_circ_0012592 | circRNA | 1.847442285 | 1.28E-10    |
| LAMB3            | mRNA    | 1.843840263 | 0.002385004 |
| hsa_circ_0027956 | circRNA | 1.842087564 | 2.77E-09    |

|                  |         |             |             |
|------------------|---------|-------------|-------------|
| hsa_circ_0077013 | circRNA | 1.836198736 | 0.01971967  |
| HECW2            | mRNA    | 1.835534579 | 1.91E-06    |
| KCNJ12           | mRNA    | 1.833391135 | 2.92E-08    |
| SRXN1            | mRNA    | 1.83189917  | 2.34E-06    |
| BGIG9606_46407   | lncRNA  | 1.8313111   | 0.011708545 |
| TMEM154          | mRNA    | 1.820787512 | 1.55E-08    |
| FADS1            | mRNA    | 1.81443859  | 1.94E-16    |
| MMP10            | mRNA    | 1.813285776 | 8.52E-04    |
| NPW              | mRNA    | 1.812561113 | 0.012226734 |
| hsa_circ_0046357 | circRNA | 1.812463619 | 5.97E-16    |
| LOC105376436     | lncRNA  | 1.799842402 | 0.040539506 |
| LOC105374454     | lncRNA  | 1.794832065 | 0.008499769 |
| hsa_circ_0046373 | circRNA | 1.793305598 | 6.30E-20    |
| hsa_circ_0022770 | circRNA | 1.788148657 | 1.00E-05    |
| TPBGL            | mRNA    | 1.78402245  | 0.021873758 |
| GSN              | mRNA    | 1.783343623 | 2.12E-09    |
| hsa_circ_0028143 | circRNA | 1.781250592 | 9.15E-05    |
| ADAMTS9          | mRNA    | 1.766999157 | 1.66E-10    |
| KDEL3            | mRNA    | 1.761391012 | 1.71E-17    |
| hsa_circ_0092119 | circRNA | 1.761157656 | 2.09E-04    |
| hsa_circ_0045686 | circRNA | 1.758334848 | 0.018254401 |
| DRAXIN           | mRNA    | 1.755468507 | 1.43E-06    |
| CCRL2            | mRNA    | 1.753159986 | 3.66E-08    |
| C3orf70          | mRNA    | 1.752153353 | 1.58E-04    |
| hsa_circ_0107789 | circRNA | 1.747557325 | 9.79E-12    |

|                  |         |             |             |
|------------------|---------|-------------|-------------|
| hsa_circ_0007674 | circRNA | 1.74636093  | 0.003923499 |
| hsa_circ_0088342 | circRNA | 1.743398488 | 0.018809734 |
| G6PD             | mRNA    | 1.743074166 | 3.77E-10    |
| hsa_circ_0135818 | circRNA | 1.743030784 | 3.83E-06    |
| hsa_circ_0005424 | circRNA | 1.742408058 | 3.08E-05    |
| SP6              | mRNA    | 1.740490083 | 5.40E-04    |
| ROPN1L           | mRNA    | 1.740465143 | 1.39E-05    |
| NR4A3            | mRNA    | 1.738550569 | 0.026841515 |
| HYAL1            | mRNA    | 1.737646778 | 1.40E-16    |
| HLX              | mRNA    | 1.737128776 | 3.98E-04    |
| hsa_circ_0057592 | circRNA | 1.733923209 | 0.004893452 |
| CXCL12           | mRNA    | 1.732529367 | 0.004811714 |
| LRP8             | mRNA    | 1.731438601 | 1.72E-09    |
| MIAT             | lncRNA  | 1.730955145 | 2.32E-04    |
| hsa_circ_0019510 | circRNA | 1.730910379 | 1.28E-06    |
| hsa_circ_0085656 | circRNA | 1.728716416 | 5.74E-21    |
| HS6ST3           | mRNA    | 1.728150513 | 0.006690197 |
| hsa_circ_0088343 | circRNA | 1.726097118 | 2.29E-04    |
| TXNRD1           | mRNA    | 1.725395619 | 6.09E-09    |
| SCD              | mRNA    | 1.722688339 | 1.45E-13    |
| LOC105374538     | lncRNA  | 1.717276661 | 0.002217735 |
| MYO7B            | mRNA    | 1.71447175  | 4.39E-04    |
| ADIRF            | mRNA    | 1.713360141 | 8.80E-06    |
| hsa_circ_0092124 | circRNA | 1.713156227 | 5.25E-08    |
| FGFR3            | mRNA    | 1.712548128 | 9.10E-06    |

|                  |         |             |             |
|------------------|---------|-------------|-------------|
| hsa_circ_0092112 | circRNA | 1.71134947  | 8.88E-08    |
| hsa_circ_0046344 | circRNA | 1.708589298 | 0.001480563 |
| hsa_circ_0135821 | circRNA | 1.708201391 | 6.22E-17    |
| hsa_circ_0092105 | circRNA | 1.707566255 | 2.09E-05    |
| hsa_circ_0088339 | circRNA | 1.706405838 | 3.78E-09    |
| MGAT5B           | mRNA    | 1.700459042 | 6.43E-06    |
| hsa_circ_0130815 | circRNA | 1.699586164 | 0.033120176 |
| CHPF             | mRNA    | 1.698085503 | 0.004306134 |
| hsa_circ_0097082 | circRNA | 1.697596136 | 2.99E-05    |
| hsa_circ_0073957 | circRNA | 1.69748702  | 0.026581813 |
| hsa_circ_0057591 | circRNA | 1.697121134 | 0.003682852 |
| hsa_circ_0118977 | circRNA | 1.691915683 | 0.016570356 |
| hsa_circ_0063623 | circRNA | 1.690538021 | 8.92E-19    |
| hsa_circ_0009124 | circRNA | 1.689676437 | 4.21E-05    |
| hsa_circ_0066447 | circRNA | 1.688814776 | 3.70E-04    |
| hsa_circ_0092116 | circRNA | 1.687002364 | 8.95E-04    |
| HR               | mRNA    | 1.679244149 | 4.13E-04    |
| hsa_circ_0045698 | circRNA | 1.671149505 | 0.001097498 |
| hsa_circ_0022371 | circRNA | 1.67095461  | 9.03E-13    |
| hsa_circ_0022370 | circRNA | 1.665912246 | 4.75E-19    |
| BCL6B            | mRNA    | 1.661609586 | 8.98E-06    |
| BGIG9606_44026   | lncRNA  | 1.661196119 | 0.006249572 |
| hsa_circ_0007044 | circRNA | 1.661130007 | 4.90E-08    |
| hsa_circ_0092117 | circRNA | 1.660762315 | 9.94E-04    |
| SLC7A11-AS1      | lncRNA  | 1.657492955 | 1.78E-04    |



|                  |         |             |             |
|------------------|---------|-------------|-------------|
| TMEM173          | mRNA    | 1.656150016 | 8.35E-14    |
| CEMIP            | mRNA    | 1.656098482 | 6.61E-06    |
| LOC101929846     | lncRNA  | 1.655785081 | 0.028839426 |
| hsa_circ_0091731 | circRNA | 1.653998667 | 4.33E-09    |
| hsa_circ_0014478 | circRNA | 1.652979564 | 3.53E-12    |
| MAP2             | mRNA    | 1.652145109 | 2.54E-04    |
| hsa_circ_0026553 | circRNA | 1.650402758 | 2.11E-04    |
| S100A3           | mRNA    | 1.649289129 | 0.003407091 |
| hsa_circ_0002150 | circRNA | 1.649232741 | 0.034843649 |
| hsa_circ_0004388 | circRNA | 1.649188004 | 0.00105734  |
| hsa_circ_0066444 | circRNA | 1.642838999 | 4.09E-08    |
| NDRG1            | mRNA    | 1.642364085 | 5.62E-11    |
| hsa_circ_0045687 | circRNA | 1.64218094  | 0.004084694 |
| hsa_circ_0019512 | circRNA | 1.642056827 | 6.08E-19    |
| hsa_circ_0045705 | circRNA | 1.639098431 | 0.028796401 |
| BATF3            | mRNA    | 1.631187322 | 0.039443809 |
| SLCO4A1-AS1      | lncRNA  | 1.629152808 | 1.75E-05    |
| THBD             | mRNA    | 1.626365108 | 6.47E-05    |
| SSTR5            | mRNA    | 1.624989624 | 0.032727052 |
| CABP4            | mRNA    | 1.624223708 | 3.05E-06    |
| ITGB4            | mRNA    | 1.623097707 | 1.22E-05    |
| hsa_circ_0092123 | circRNA | 1.621736877 | 0.019440651 |
| hsa_circ_0012716 | circRNA | 1.620287349 | 9.89E-05    |
| HSD17B7          | mRNA    | 1.61274227  | 3.15E-18    |
| hsa_circ_0097083 | circRNA | 1.610517032 | 0.001345251 |

|                  |         |             |             |
|------------------|---------|-------------|-------------|
| LOC100287036     | mRNA    | 1.609040708 | 0.017401456 |
| hsa_circ_0118838 | circRNA | 1.608873804 | 2.11E-09    |
| hsa_circ_0014482 | circRNA | 1.607413667 | 6.83E-06    |
| hsa_circ_0004564 | circRNA | 1.604602779 | 3.77E-04    |
| hsa_circ_0085657 | circRNA | 1.602395139 | 1.13E-06    |
| HSPC324          | lncRNA  | 1.594496512 | 0.004513201 |
| BGIG9606_51236   | lncRNA  | 1.590891357 | 0.025849556 |
| hsa_circ_0046328 | circRNA | 1.585945016 | 2.56E-04    |
| hsa_circ_0066446 | circRNA | 1.584256742 | 4.54E-07    |
| hsa_circ_0092128 | circRNA | 1.580136836 | 8.67E-05    |
| CHRNE            | mRNA    | 1.579236774 | 0.001632829 |
| COL9A3           | mRNA    | 1.579161763 | 4.71E-04    |
| hsa_circ_0118468 | circRNA | 1.578372347 | 0.002015551 |
| LOC105369378     | lncRNA  | 1.578008861 | 0.001089624 |
| SREBF2           | mRNA    | 1.572897445 | 1.19E-30    |
| ERG28            | mRNA    | 1.571735196 | 1.05E-19    |
| hsa_circ_0085651 | circRNA | 1.570701724 | 9.22E-15    |
| ZNF295-AS1       | lncRNA  | 1.570274373 | 0.025528965 |
| IGFBP6           | mRNA    | 1.569471361 | 7.33E-08    |
| TUBA4A           | mRNA    | 1.565578655 | 4.42E-09    |
| LOC102723761     | lncRNA  | 1.565503066 | 0.021754705 |
| GDF15            | mRNA    | 1.564245464 | 1.45E-04    |
| hsa_circ_0046374 | circRNA | 1.557166834 | 2.04E-09    |
| LOC105369194     | lncRNA  | 1.553022929 | 0.001993163 |
| DERL3            | mRNA    | 1.55030506  | 2.08E-04    |

|                  |         |             |             |
|------------------|---------|-------------|-------------|
| ALS2CL           | mRNA    | 1.548568416 | 1.39E-10    |
| TRIM7            | mRNA    | 1.546695618 | 0.001354073 |
| hsa_circ_0045706 | circRNA | 1.546131813 | 0.009741298 |
| LOC102723733     | lncRNA  | 1.542836528 | 1.82E-04    |
| OLFM1            | mRNA    | 1.536858587 | 0.00285412  |
| FAM95B1          | lncRNA  | 1.536834996 | 0.020888454 |
| TMEM97           | mRNA    | 1.53662413  | 2.81E-07    |
| hsa_circ_0063614 | circRNA | 1.536150563 | 2.15E-06    |
| DOC2GP           | pseudo  | 1.533268306 | 0.016605846 |
| LOC107984011     | lncRNA  | 1.532243703 | 0.041670115 |
| hsa_circ_0019513 | circRNA | 1.532037445 | 4.11E-04    |
| hsa_circ_0044653 | circRNA | 1.52930749  | 6.87E-08    |
| LOC105374836     | lncRNA  | 1.526538582 | 0.005216402 |
| hsa_circ_0022365 | circRNA | 1.524894922 | 5.20E-05    |
| hsa_circ_0085647 | circRNA | 1.523283854 | 4.79E-15    |
| TUBA1A           | mRNA    | 1.517914689 | 1.68E-14    |
| NUDT8            | mRNA    | 1.515674433 | 4.31E-07    |
| hsa_circ_0045708 | circRNA | 1.511156578 | 0.002734751 |
| hsa_circ_0063619 | circRNA | 1.507018105 | 8.77E-24    |
| hsa_circ_0042351 | circRNA | 1.505955576 | 9.35E-06    |
| hsa_circ_0092113 | circRNA | 1.501231143 | 1.50E-05    |
| EPDR1            | mRNA    | 1.499941067 | 0.010055482 |
| HSD17B7P2        | pseudo  | 1.498426282 | 0.006171388 |
| hsa_circ_0092122 | circRNA | 1.493257983 | 6.62E-06    |
| MATN1            | mRNA    | 1.485469935 | 0.026419769 |

|                  |         |             |             |
|------------------|---------|-------------|-------------|
| DLGAP1-AS2       | lncRNA  | 1.484551002 | 8.08E-05    |
| SLC17A9          | mRNA    | 1.482143239 | 8.78E-08    |
| hsa_circ_0116652 | circRNA | 1.478889832 | 1.14E-20    |
| TRIM16L          | mRNA    | 1.475417741 | 5.99E-05    |
| hsa_circ_0012715 | circRNA | 1.472021143 | 2.85E-04    |
| ALDH1L2          | mRNA    | 1.470821435 | 3.46E-07    |
| LOC105371453     | lncRNA  | 1.470469507 | 6.42E-04    |
| S1PR4            | mRNA    | 1.470425999 | 3.27E-09    |
| hsa_circ_0075636 | circRNA | 1.469974328 | 3.60E-06    |
| TRIM16           | mRNA    | 1.467784663 | 3.05E-06    |
| hsa_circ_0085653 | circRNA | 1.465821911 | 2.02E-04    |
| SLC29A2          | mRNA    | 1.462820527 | 6.73E-07    |
| hsa_circ_0118845 | circRNA | 1.461963678 | 2.32E-16    |
| RAPH1            | mRNA    | 1.45806836  | 4.05E-18    |
| CA13             | mRNA    | 1.456361906 | 1.67E-04    |
| TUBB3            | mRNA    | 1.453457783 | 5.03E-06    |
| HS3ST1           | mRNA    | 1.449497704 | 0.004169892 |
| GPAT3            | mRNA    | 1.44847388  | 2.70E-06    |
| PDE2A            | mRNA    | 1.446369976 | 3.01E-20    |
| CYP27C1          | mRNA    | 1.443058432 | 0.045702171 |
| NSDHL            | mRNA    | 1.443006493 | 3.10E-13    |
| hsa_circ_0022972 | circRNA | 1.442247288 | 9.59E-14    |
| hsa_circ_0085646 | circRNA | 1.441902118 | 6.12E-12    |
| BIRC3            | mRNA    | 1.441782091 | 0.004888155 |
| OAF              | mRNA    | 1.439942952 | 2.22E-05    |

|                  |         |             |             |
|------------------|---------|-------------|-------------|
| hsa_circ_0061480 | circRNA | 1.437505499 | 3.15E-04    |
| hsa_circ_0043728 | circRNA | 1.430249302 | 1.52E-13    |
| hsa_circ_0009733 | circRNA | 1.425812749 | 1.64E-04    |
| hsa_circ_0092111 | circRNA | 1.425248935 | 0.004835736 |
| hsa_circ_0058364 | circRNA | 1.425038094 | 4.93E-12    |
| GCLM             | mRNA    | 1.421678271 | 2.09E-05    |
| hsa_circ_0092127 | circRNA | 1.421167171 | 5.14E-04    |
| LOC101928465     | lncRNA  | 1.419207584 | 7.43E-04    |
| ANK2             | mRNA    | 1.4187308   | 0.003000726 |
| LOC105378726     | lncRNA  | 1.415536141 | 1.30E-04    |
| SLC16A13         | mRNA    | 1.412860108 | 5.22E-05    |
| hsa_circ_0061144 | circRNA | 1.411017485 | 2.94E-05    |
| LOC105374732     | lncRNA  | 1.410595566 | 0.035428066 |
| PDZD4            | mRNA    | 1.410552357 | 0.032786776 |
| CDR2L            | mRNA    | 1.409943617 | 4.13E-10    |
| MAFG-DT          | lncRNA  | 1.408924216 | 4.15E-08    |
| HYAL2            | mRNA    | 1.404104413 | 2.06E-08    |
| hsa_circ_0136155 | circRNA | 1.403429062 | 4.79E-05    |
| hsa_circ_0016295 | circRNA | 1.402477647 | 0.007498735 |
| hsa_circ_0124463 | circRNA | 1.401365133 | 6.36E-04    |
| DUSP5            | mRNA    | 1.397199826 | 2.80E-05    |
| GNAZ             | mRNA    | 1.396277155 | 0.00145888  |
| PYCR1            | mRNA    | 1.394420657 | 3.15E-10    |
| hsa_circ_0088341 | circRNA | 1.394187505 | 2.26E-06    |
| hsa_circ_0029581 | circRNA | 1.392426466 | 1.18E-05    |

|                  |         |             |             |
|------------------|---------|-------------|-------------|
| PCDHGC3          | mRNA    | 1.391962811 | 6.01E-11    |
| STARD4           | mRNA    | 1.390489507 | 3.48E-14    |
| hsa_circ_0013221 | circRNA | 1.386388126 | 6.75E-04    |
| hsa_circ_0091727 | circRNA | 1.385705521 | 2.39E-11    |
| hsa_circ_0088340 | circRNA | 1.38215892  | 4.53E-06    |
| GPC1             | mRNA    | 1.381815437 | 1.06E-05    |
| hsa_circ_0019511 | circRNA | 1.379309863 | 0.015442499 |
| DUSP10           | mRNA    | 1.378063783 | 0.004305687 |
| NPPA-AS1         | lncRNA  | 1.376813056 | 0.009152458 |
| hsa_circ_0043260 | circRNA | 1.374316542 | 7.10E-06    |
| SC5D             | mRNA    | 1.374042425 | 1.40E-20    |
| AKAP12           | mRNA    | 1.373678609 | 8.34E-05    |
| TMEM171          | mRNA    | 1.372033262 | 2.83E-05    |
| hsa_circ_0043726 | circRNA | 1.371394257 | 2.09E-05    |
| hsa_circ_0085655 | circRNA | 1.370368015 | 0.004113085 |
| BGIG9606_49374   | lncRNA  | 1.369208227 | 0.009569867 |
| hsa_circ_0083855 | circRNA | 1.368155232 | 0.004793928 |
| LOC107986178     | lncRNA  | 1.36734076  | 1.52E-07    |
| LOC102724580     | pseudo  | 1.366895482 | 0.001245267 |
| LINC02435        | lncRNA  | 1.366596822 | 0.01883371  |
| LOC105376205     | lncRNA  | 1.36594704  | 0.045244276 |
| hsa_circ_0005613 | circRNA | 1.36486932  | 5.66E-06    |
| hsa_circ_0005714 | circRNA | 1.364788479 | 0.009402221 |
| EBP              | mRNA    | 1.36173489  | 1.46E-06    |
| hsa_circ_0116655 | circRNA | 1.357367097 | 0.001707158 |

|                  |         |             |             |
|------------------|---------|-------------|-------------|
| hsa_circ_0070752 | circRNA | 1.352990581 | 3.75E-12    |
| PCYT2            | mRNA    | 1.352014309 | 3.06E-09    |
| APOL4            | mRNA    | 1.351798183 | 0.00123917  |
| hsa_circ_0124083 | circRNA | 1.351279631 | 1.78E-11    |
| LOC105378526     | lncRNA  | 1.351166312 | 9.71E-05    |
| CDKN2B           | mRNA    | 1.350621802 | 0.011166975 |
| FAM3D            | mRNA    | 1.350552945 | 0.030487421 |
| BGIG9606_50266   | lncRNA  | 1.348390008 | 0.047464597 |
| APOB             | mRNA    | 1.347722827 | 0.019921683 |
| BGIG9606_55956   | lncRNA  | 1.347401566 | 0.024197278 |
| hsa_circ_0089374 | circRNA | 1.345490383 | 0.001318741 |
| hsa_circ_0051428 | circRNA | 1.344645066 | 5.25E-04    |
| PFKFB4           | mRNA    | 1.343853117 | 4.62E-07    |
| CDKN1A           | mRNA    | 1.341175611 | 4.79E-06    |
| hsa_circ_0118844 | circRNA | 1.340905052 | 2.30E-15    |
| GRAMD2B          | mRNA    | 1.339128085 | 3.90E-13    |
| hsa_circ_0094049 | circRNA | 1.33899251  | 0.032029771 |
| SLCO2A1          | mRNA    | 1.338354552 | 0.008226885 |
| CTSL             | mRNA    | 1.334899281 | 3.96E-04    |
| hsa_circ_0044645 | circRNA | 1.33463329  | 9.84E-06    |
| hsa_circ_0029565 | circRNA | 1.333834401 | 0.013235405 |
| NES              | mRNA    | 1.333231211 | 3.38E-04    |
| LINC02454        | lncRNA  | 1.328082236 | 2.86E-11    |
| hsa_circ_0090938 | circRNA | 1.327889939 | 4.29E-10    |
| hsa_circ_0022965 | circRNA | 1.327828339 | 4.88E-16    |

|                  |         |             |             |
|------------------|---------|-------------|-------------|
| hsa_circ_0043709 | circRNA | 1.326589722 | 0.007239942 |
| hsa_circ_0023448 | circRNA | 1.324086883 | 1.17E-07    |
| PHLDA2           | mRNA    | 1.32346952  | 1.44E-04    |
| hsa_circ_0068315 | circRNA | 1.322357202 | 0.01852778  |
| TRNP1            | mRNA    | 1.322255896 | 7.68E-05    |
| MMP24            | mRNA    | 1.32147258  | 1.15E-04    |
| OAS1             | mRNA    | 1.317672302 | 1.25E-05    |
| hsa_circ_0097447 | circRNA | 1.316106745 | 0.001576361 |
| hsa_circ_0045566 | circRNA | 1.315445199 | 8.12E-05    |
| hsa_circ_0114538 | circRNA | 1.315113483 | 0.001595656 |
| ANKRD44          | mRNA    | 1.313155073 | 0.005615439 |
| LOC102724740     | lncRNA  | 1.313079917 | 1.22E-04    |
| hsa_circ_0009732 | circRNA | 1.311652241 | 9.03E-04    |
| KCNK1            | mRNA    | 1.307197602 | 0.008647833 |
| SLC16A9          | mRNA    | 1.306575845 | 0.045790785 |
| hsa_circ_0106839 | circRNA | 1.306143669 | 6.04E-06    |
| DHH              | mRNA    | 1.302426189 | 0.009088581 |
| HES6             | mRNA    | 1.300745313 | 0.00108395  |
| hsa_circ_0013222 | circRNA | 1.29998886  | 0.003438284 |
| hsa_circ_0138796 | circRNA | 1.299948893 | 0.00436705  |
| ARHGDIG          | mRNA    | 1.298069539 | 0.038964917 |
| PANX2            | mRNA    | 1.297667558 | 9.16E-05    |
| ARL4C            | mRNA    | 1.29711189  | 0.001531369 |
| PLAUR            | mRNA    | 1.296105977 | 8.26E-04    |
| hsa_circ_0075323 | circRNA | 1.295290985 | 0.009165987 |



|                  |         |             |             |
|------------------|---------|-------------|-------------|
| hsa_circ_0014421 | circRNA | 1.294918906 | 0.007582773 |
| APOL3            | mRNA    | 1.292091025 | 3.52E-19    |
| YIF1A            | mRNA    | 1.289768443 | 7.42E-14    |
| hsa_circ_0003987 | circRNA | 1.288746298 | 0.022921154 |
| hsa_circ_0106159 | circRNA | 1.288027643 | 4.07E-07    |
| ITGA10           | mRNA    | 1.287268105 | 0.002421727 |
| PLPP3            | mRNA    | 1.283508012 | 7.01E-06    |
| EEF1AKMT4        | mRNA    | 1.278146089 | 2.19E-06    |
| RNF122           | mRNA    | 1.276609251 | 0.011342335 |
| hsa_circ_0106155 | circRNA | 1.275275967 | 3.07E-05    |
| hsa_circ_0128328 | circRNA | 1.272795856 | 5.14E-04    |
| SLC6A6           | mRNA    | 1.271528349 | 0.002196855 |
| hsa_circ_0118840 | circRNA | 1.270736474 | 0.002109955 |
| HSPA1B           | mRNA    | 1.269366676 | 1.67E-05    |
| hsa_circ_0009724 | circRNA | 1.268983817 | 0.0351108   |
| hsa_circ_0069770 | circRNA | 1.268536649 | 0.022357767 |
| SPRY4            | mRNA    | 1.26461702  | 5.52E-10    |
| hsa_circ_0044220 | circRNA | 1.264025418 | 1.21E-05    |
| IL10RA           | mRNA    | 1.262030684 | 5.21E-04    |
| TNFRSF11B        | mRNA    | 1.261751888 | 0.034738642 |
| hsa_circ_0045577 | circRNA | 1.259643412 | 9.25E-08    |
| PGD              | mRNA    | 1.259634102 | 5.60E-05    |
| SH3BP5           | mRNA    | 1.258258012 | 9.42E-08    |
| RCN3             | mRNA    | 1.256548876 | 2.72E-07    |
| C11orf24         | mRNA    | 1.256495402 | 5.72E-08    |

|                  |         |             |             |
|------------------|---------|-------------|-------------|
| SPRY1            | mRNA    | 1.256145347 | 1.37E-19    |
| PAQR4            | mRNA    | 1.255482549 | 9.04E-05    |
| LOC100507564     | lncRNA  | 1.253860682 | 5.39E-06    |
| hsa_circ_0051351 | circRNA | 1.253095594 | 0.029231486 |
| hsa_circ_0009735 | circRNA | 1.250478285 | 0.023672721 |
| HID1-AS1         | lncRNA  | 1.246548289 | 0.005524341 |
| HYAL3            | mRNA    | 1.246475202 | 1.39E-13    |
| TFEC             | mRNA    | 1.245833761 | 0.03609475  |
| KLHL35           | mRNA    | 1.244513768 | 0.001345424 |
| hsa_circ_0051352 | circRNA | 1.24076603  | 0.034139165 |
| TNFRSF10A        | mRNA    | 1.239665216 | 5.92E-05    |
| hsa_circ_0091212 | circRNA | 1.237560963 | 0.047236964 |
| FXVD6-FXVD2      | mRNA    | 1.237294556 | 0.034969622 |
| hsa_circ_0003090 | circRNA | 1.235967948 | 1.64E-04    |
| ADCY7            | mRNA    | 1.23547155  | 4.96E-10    |
| hsa_circ_0043722 | circRNA | 1.234875548 | 1.00E-07    |
| hsa_circ_0118843 | circRNA | 1.233953879 | 1.07E-11    |
| hsa_circ_0046273 | circRNA | 1.230743183 | 1.19E-09    |
| hsa_circ_0129926 | circRNA | 1.230551897 | 0.007253908 |
| SLC2A6           | mRNA    | 1.230036006 | 1.63E-07    |
| hsa_circ_0138691 | circRNA | 1.227785259 | 1.66E-05    |
| hsa_circ_0071726 | circRNA | 1.226247936 | 1.82E-04    |
| hsa_circ_0075322 | circRNA | 1.226136676 | 0.012056832 |
| ME1              | mRNA    | 1.225724442 | 9.68E-05    |
| SLC41A2          | mRNA    | 1.225282961 | 3.71E-09    |

|                  |         |             |             |
|------------------|---------|-------------|-------------|
| hsa_circ_0043735 | circRNA | 1.224815741 | 0.036909429 |
| SNAI1            | mRNA    | 1.223771554 | 1.84E-04    |
| hsa_circ_0018636 | circRNA | 1.222825597 | 0.005391349 |
| hsa_circ_0066176 | circRNA | 1.221428233 | 0.005990161 |
| hsa_circ_0006078 | circRNA | 1.220484083 | 2.63E-07    |
| EFNB1            | mRNA    | 1.220467386 | 1.51E-05    |
| hsa_circ_0110931 | circRNA | 1.219872303 | 2.05E-05    |
| hsa_circ_0003513 | circRNA | 1.21878731  | 0.03687346  |
| hsa_circ_0005129 | circRNA | 1.218557485 | 2.24E-05    |
| hsa_circ_0136327 | circRNA | 1.214582264 | 0.007780652 |
| hsa_circ_0043730 | circRNA | 1.213801532 | 0.018409932 |
| hsa_circ_0124342 | circRNA | 1.21119518  | 1.73E-08    |
| hsa_circ_0140515 | circRNA | 1.210512784 | 6.44E-05    |
| FRRS1            | mRNA    | 1.210194172 | 0.047779299 |
| hsa_circ_0022966 | circRNA | 1.210010666 | 5.17E-14    |
| SQSTM1           | mRNA    | 1.209427997 | 3.39E-04    |
| hsa_circ_0075321 | circRNA | 1.208771735 | 0.005842615 |
| hsa_circ_0066259 | circRNA | 1.207404421 | 1.86E-08    |
| hsa_circ_0066579 | circRNA | 1.206706827 | 1.31E-06    |
| LPCAT1           | mRNA    | 1.206290798 | 8.29E-09    |
| hsa_circ_0106699 | circRNA | 1.205454254 | 0.005998025 |
| hsa_circ_0008610 | circRNA | 1.204175645 | 1.25E-05    |
| RASA4DP          | pseudo  | 1.203210535 | 0.001591439 |
| hsa_circ_0061145 | circRNA | 1.203156646 | 0.001753632 |
| AACS             | mRNA    | 1.202544037 | 5.71E-12    |

|                  |         |             |             |
|------------------|---------|-------------|-------------|
| SNAI3-AS1        | lncRNA  | 1.201925683 | 2.67E-18    |
| MFSD6            | mRNA    | 1.200835351 | 1.25E-04    |
| hsa_circ_0092081 | circRNA | 1.200372385 | 0.001108113 |
| hsa_circ_0058476 | circRNA | 1.199562748 | 6.35E-07    |
| hsa_circ_0077210 | circRNA | 1.198041968 | 0.009279338 |
| hsa_circ_0002997 | circRNA | 1.191643449 | 2.96E-07    |
| hsa_circ_0042525 | circRNA | 1.190885862 | 8.56E-05    |
| TMEM217          | mRNA    | 1.189782006 | 8.26E-04    |
| hsa_circ_0069434 | circRNA | 1.189216617 | 3.36E-11    |
| hsa_circ_0009728 | circRNA | 1.189118174 | 0.038497412 |
| hsa_circ_0115809 | circRNA | 1.184735852 | 0.003385094 |
| hsa_circ_0032281 | circRNA | 1.183454758 | 5.80E-04    |
| hsa_circ_0013891 | circRNA | 1.183173071 | 0.031150679 |
| hsa_circ_0078299 | circRNA | 1.182659813 | 0.001975964 |
| hsa_circ_0083854 | circRNA | 1.182279496 | 0.023862771 |
| hsa_circ_0075318 | circRNA | 1.181207905 | 0.024588703 |
| hsa_circ_0087008 | circRNA | 1.181047201 | 1.66E-04    |
| hsa_circ_0051740 | circRNA | 1.180867912 | 0.021128417 |
| hsa_circ_0014538 | circRNA | 1.18000163  | 2.28E-04    |
| hsa_circ_0029383 | circRNA | 1.179298067 | 4.28E-07    |
| hsa_circ_0129539 | circRNA | 1.179238323 | 3.35E-04    |
| ALDOC            | mRNA    | 1.178314934 | 8.96E-06    |
| hsa_circ_0131624 | circRNA | 1.177627073 | 1.76E-07    |
| hsa_circ_0019712 | circRNA | 1.175644024 | 6.17E-04    |
| hsa_circ_0043725 | circRNA | 1.173197591 | 0.009418207 |

|                  |         |             |             |
|------------------|---------|-------------|-------------|
| DCST1-AS1        | lncRNA  | 1.170647333 | 0.002879702 |
| hsa_circ_0101181 | circRNA | 1.170604427 | 0.010318986 |
| hsa_circ_0077014 | circRNA | 1.168928748 | 0.032865795 |
| hsa_circ_0049435 | circRNA | 1.168545156 | 7.34E-04    |
| ADCY1            | mRNA    | 1.168484702 | 0.016998262 |
| hsa_circ_0106689 | circRNA | 1.168478347 | 2.03E-05    |
| hsa_circ_0106156 | circRNA | 1.168381915 | 3.12E-04    |
| hsa_circ_0073995 | circRNA | 1.166941247 | 0.014340248 |
| hsa_circ_0119233 | circRNA | 1.166787217 | 6.79E-07    |
| hsa_circ_0090939 | circRNA | 1.164287049 | 0.011256036 |
| hsa_circ_0073773 | circRNA | 1.162537044 | 0.036955937 |
| hsa_circ_0043710 | circRNA | 1.162351877 | 0.002222171 |
| MYC              | mRNA    | 1.160131316 | 4.58E-08    |
| hsa_circ_0138032 | circRNA | 1.158942859 | 0.001830131 |
| EMILIN2          | mRNA    | 1.158787373 | 7.16E-06    |
| FAM114A1         | mRNA    | 1.155437882 | 1.89E-13    |
| TLCD1            | mRNA    | 1.155122151 | 3.42E-04    |
| CREB5            | mRNA    | 1.15297704  | 0.030027363 |
| hsa_circ_0006253 | circRNA | 1.152857487 | 3.70E-04    |
| hsa_circ_0025419 | circRNA | 1.151371499 | 0.001213412 |
| hsa_circ_0067254 | circRNA | 1.150488322 | 1.59E-06    |
| TUBB2A           | mRNA    | 1.150400064 | 3.63E-07    |
| hsa_circ_0043729 | circRNA | 1.150252715 | 1.53E-14    |
| hsa_circ_0106124 | circRNA | 1.149420557 | 0.022086721 |
| hsa_circ_0007751 | circRNA | 1.148712474 | 0.01491131  |

|                  |         |             |             |
|------------------|---------|-------------|-------------|
| CXCL8            | mRNA    | 1.148171265 | 0.011968959 |
| hsa_circ_0118839 | circRNA | 1.147092445 | 0.027219599 |
| hsa_circ_0066584 | circRNA | 1.146695037 | 0.010728753 |
| PLPP1            | mRNA    | 1.146279391 | 4.47E-11    |
| BCL2             | mRNA    | 1.145247272 | 0.004111435 |
| hsa_circ_0071730 | circRNA | 1.145146615 | 0.003107119 |
| hsa_circ_0049424 | circRNA | 1.144891485 | 0.009814244 |
| hsa_circ_0043744 | circRNA | 1.144105466 | 1.86E-13    |
| hsa_circ_0106837 | circRNA | 1.143581973 | 9.02E-05    |
| SLC25A1          | mRNA    | 1.143010264 | 1.62E-08    |
| NENF             | mRNA    | 1.142957212 | 6.69E-05    |
| hsa_circ_0043707 | circRNA | 1.142413326 | 2.87E-08    |
| IL18BP           | mRNA    | 1.142369555 | 1.41E-07    |
| GBE1             | mRNA    | 1.142233757 | 3.11E-04    |
| hsa_circ_0031127 | circRNA | 1.141905961 | 1.17E-07    |
| hsa_circ_0013175 | circRNA | 1.14176369  | 0.041671584 |
| LOC101927825     | lncRNA  | 1.140357218 | 4.14E-04    |
| CGREF1           | mRNA    | 1.138750883 | 0.031477313 |
| hsa_circ_0066257 | circRNA | 1.137717529 | 0.00201697  |
| SYT1             | mRNA    | 1.137238062 | 0.044903641 |
| hsa_circ_0003267 | circRNA | 1.136603257 | 0.016095614 |
| hsa_circ_0097927 | circRNA | 1.136298124 | 1.25E-08    |
| ZMYND15          | mRNA    | 1.136241866 | 0.005203441 |
| hsa_circ_0132273 | circRNA | 1.133697031 | 2.79E-09    |
| hsa_circ_0001092 | circRNA | 1.133477433 | 0.034870941 |

|                  |         |             |             |
|------------------|---------|-------------|-------------|
| ARHGAP27         | mRNA    | 1.132999682 | 1.51E-05    |
| hsa_circ_0097926 | circRNA | 1.132815716 | 1.97E-08    |
| hsa_circ_0066258 | circRNA | 1.132247314 | 8.48E-04    |
| CMPK2            | mRNA    | 1.131199696 | 0.018628046 |
| hsa_circ_0067255 | circRNA | 1.130483742 | 1.22E-04    |
| hsa_circ_0097841 | circRNA | 1.12900606  | 1.11E-05    |
| GPR3             | mRNA    | 1.12684005  | 8.50E-07    |
| hsa_circ_0074137 | circRNA | 1.126711284 | 0.024550838 |
| hsa_circ_0131040 | circRNA | 1.126130051 | 3.03E-06    |
| hsa_circ_0118841 | circRNA | 1.126026955 | 0.028238148 |
| ANKRD20A1        | mRNA    | 1.12585112  | 0.016018377 |
| hsa_circ_0029374 | circRNA | 1.125797565 | 8.58E-09    |
| hsa_circ_0027610 | circRNA | 1.125697897 | 0.038710036 |
| hsa_circ_0005864 | circRNA | 1.125174714 | 0.001714066 |
| hsa_circ_0038055 | circRNA | 1.123539311 | 0.001408146 |
| hsa_circ_0088698 | circRNA | 1.120415228 | 2.75E-04    |
| SLC25A37         | mRNA    | 1.120051898 | 2.87E-05    |
| hsa_circ_0127818 | circRNA | 1.11996418  | 1.50E-05    |
| hsa_circ_0002994 | circRNA | 1.119900698 | 3.66E-14    |
| hsa_circ_0115402 | circRNA | 1.119772317 | 4.35E-09    |
| hsa_circ_0139847 | circRNA | 1.119298295 | 0.023441384 |
| hsa_circ_0127831 | circRNA | 1.118576742 | 4.64E-04    |
| hsa_circ_0136320 | circRNA | 1.118219922 | 0.005646299 |
| NKX3-1           | mRNA    | 1.117912153 | 0.005916587 |
| hsa_circ_0043713 | circRNA | 1.117815575 | 2.08E-11    |

|                  |         |             |             |
|------------------|---------|-------------|-------------|
| SOD2-OT1         | lncRNA  | 1.116277322 | 0.022439881 |
| DOCK5            | mRNA    | 1.116044573 | 0.043050154 |
| EMP3             | mRNA    | 1.114897382 | 1.34E-06    |
| hsa_circ_0106160 | circRNA | 1.113697991 | 8.16E-05    |
| hsa_circ_0043720 | circRNA | 1.113571112 | 1.17E-07    |
| hsa_circ_0069436 | circRNA | 1.113434616 | 0.003736176 |
| OAS3             | mRNA    | 1.112374835 | 2.90E-07    |
| SERPINE2         | mRNA    | 1.112179669 | 6.44E-07    |
| hsa_circ_0069435 | circRNA | 1.111900477 | 4.82E-07    |
| FAM107A          | mRNA    | 1.111848164 | 2.13E-05    |
| CATSPERG         | mRNA    | 1.111360651 | 0.018680834 |
| FXVD6            | mRNA    | 1.111349724 | 3.02E-06    |
| LOC107986558     | lncRNA  | 1.110985232 | 0.007328162 |
| hsa_circ_0066589 | circRNA | 1.109106711 | 0.014097793 |
| hsa_circ_0110848 | circRNA | 1.108980206 | 0.001864437 |
| TAF13            | mRNA    | 1.10819086  | 5.25E-08    |
| hsa_circ_0014887 | circRNA | 1.108002628 | 0.025345129 |
| CD55             | mRNA    | 1.107772296 | 3.55E-06    |
| hsa_circ_0066586 | circRNA | 1.107734365 | 0.031014981 |
| BGIG9606_46452   | mRNA    | 1.107632291 | 0.034941534 |
| hsa_circ_0110671 | circRNA | 1.107621928 | 0.008815393 |
| ACLY             | mRNA    | 1.106405083 | 9.41E-10    |
| CASKIN2          | mRNA    | 1.105658126 | 5.50E-05    |
| hsa_circ_0050021 | circRNA | 1.104641723 | 0.01670908  |
| IRAK2            | mRNA    | 1.103125241 | 0.004739501 |



|                  |         |             |             |
|------------------|---------|-------------|-------------|
| hsa_circ_0058350 | circRNA | 1.102691266 | 0.009447966 |
| hsa_circ_0106693 | circRNA | 1.102415134 | 2.21E-06    |
| hsa_circ_0066585 | circRNA | 1.102268697 | 0.015279255 |
| MEF2A            | mRNA    | 1.102056834 | 5.74E-04    |
| hsa_circ_0077208 | circRNA | 1.101767597 | 0.001777335 |
| hsa_circ_0028772 | circRNA | 1.101181545 | 0.003818917 |
| SLC12A2          | mRNA    | 1.101117868 | 8.07E-04    |
| hsa_circ_0043737 | circRNA | 1.099964014 | 4.33E-09    |
| CKB              | mRNA    | 1.098862602 | 0.001952674 |
| hsa_circ_0047177 | circRNA | 1.098559259 | 3.48E-04    |
| hsa_circ_0136324 | circRNA | 1.097467876 | 0.007374376 |
| hsa_circ_0043702 | circRNA | 1.097127173 | 0.001491688 |
| hsa_circ_0007438 | circRNA | 1.096025505 | 2.56E-08    |
| EXOC3L1          | mRNA    | 1.095536343 | 0.00396687  |
| hsa_circ_0043741 | circRNA | 1.094950536 | 2.13E-10    |
| hsa_circ_0042561 | circRNA | 1.09306543  | 0.022288072 |
| NFKB2            | mRNA    | 1.09290815  | 2.21E-11    |
| hsa_circ_0049427 | circRNA | 1.092595143 | 0.022105883 |
| hsa_circ_0120168 | circRNA | 1.089475609 | 0.005296461 |
| PALD1            | mRNA    | 1.088054423 | 3.78E-04    |
| hsa_circ_0128607 | circRNA | 1.087886541 | 7.05E-05    |
| IER5             | mRNA    | 1.087065065 | 9.82E-05    |
| PNP              | mRNA    | 1.086805747 | 8.86E-05    |
| hsa_circ_0043731 | circRNA | 1.085971653 | 1.19E-04    |
| CLDN15           | mRNA    | 1.085808892 | 0.009946944 |

|                  |         |             |             |
|------------------|---------|-------------|-------------|
| hsa_circ_0052677 | circRNA | 1.084785733 | 0.003699113 |
| hsa_circ_0133005 | circRNA | 1.084743556 | 1.37E-04    |
| PIM1             | mRNA    | 1.084651736 | 6.08E-06    |
| hsa_circ_0130811 | circRNA | 1.084641675 | 0.02955537  |
| TMEM189          | mRNA    | 1.084503216 | 1.53E-09    |
| FUT1             | mRNA    | 1.084294738 | 4.84E-11    |
| hsa_circ_0088694 | circRNA | 1.084148373 | 2.64E-04    |
| GSR              | mRNA    | 1.083596851 | 8.38E-05    |
| FLRT3            | mRNA    | 1.082603228 | 0.049014973 |
| STMN3            | mRNA    | 1.081416416 | 0.04225039  |
| hsa_circ_0001000 | circRNA | 1.079431881 | 0.016264508 |
| ARF4             | mRNA    | 1.077697408 | 1.16E-06    |
| NCALD            | mRNA    | 1.077106278 | 0.009568072 |
| EPS8L2           | mRNA    | 1.076891596 | 0.009256135 |
| LOC100130283     | lncRNA  | 1.07685182  | 0.013039288 |
| PLAT             | mRNA    | 1.075770482 | 0.014231466 |
| TTC7A            | mRNA    | 1.075589347 | 4.30E-06    |
| hsa_circ_0032099 | circRNA | 1.07558074  | 0.001404631 |
| hsa_circ_0048491 | circRNA | 1.075219654 | 1.10E-04    |
| SLC17A5          | mRNA    | 1.074464142 | 8.33E-15    |
| hsa_circ_0014420 | circRNA | 1.074211329 | 0.015442499 |
| hsa_circ_0085533 | circRNA | 1.07409531  | 0.013850162 |
| hsa_circ_0106162 | circRNA | 1.073734405 | 0.001116536 |
| hsa_circ_0110291 | circRNA | 1.073316183 | 3.56E-05    |
| TBC1D8           | mRNA    | 1.073148433 | 2.01E-06    |

|                  |         |             |             |
|------------------|---------|-------------|-------------|
| hsa_circ_0047166 | circRNA | 1.071109744 | 2.39E-05    |
| hsa_circ_0084097 | circRNA | 1.070348021 | 0.022216785 |
| BGIG9606_54991   | mRNA    | 1.066244746 | 3.51E-06    |
| hsa_circ_0095107 | circRNA | 1.06554087  | 0.009428627 |
| hsa_circ_0008107 | circRNA | 1.065194743 | 1.23E-09    |
| SEMA6A           | mRNA    | 1.064428636 | 7.68E-05    |
| hsa_circ_0124717 | circRNA | 1.064176733 | 0.018266632 |
| KLF8             | mRNA    | 1.062427163 | 1.15E-04    |
| hsa_circ_0042027 | circRNA | 1.062314835 | 1.60E-06    |
| C9orf139         | mRNA    | 1.061525731 | 0.014165716 |
| hsa_circ_0083865 | circRNA | 1.059195359 | 2.22E-07    |
| SPTBN5           | mRNA    | 1.059081827 | 7.96E-06    |
| hsa_circ_0107057 | circRNA | 1.058441097 | 0.011631338 |
| hsa_circ_0081895 | circRNA | 1.05837209  | 0.044076412 |
| hsa_circ_0044638 | circRNA | 1.058051124 | 8.23E-06    |
| hsa_circ_0136321 | circRNA | 1.057787508 | 0.043187929 |
| hsa_circ_0051847 | circRNA | 1.056749616 | 0.012841128 |
| PPP1R14A         | mRNA    | 1.056624093 | 0.039874547 |
| NEDD9            | mRNA    | 1.056472298 | 2.39E-09    |
| hsa_circ_0062210 | circRNA | 1.055046741 | 2.17E-09    |
| hsa_circ_0057750 | circRNA | 1.054991054 | 0.010218843 |
| TRIB3            | mRNA    | 1.054927114 | 0.001153321 |
| PMAIP1           | mRNA    | 1.054679627 | 0.039409006 |
| hsa_circ_0073775 | circRNA | 1.054482868 | 4.36E-05    |
| hsa_circ_0107066 | circRNA | 1.052981669 | 2.02E-05    |

|                  |         |             |             |
|------------------|---------|-------------|-------------|
| hsa_circ_0088689 | circRNA | 1.052897307 | 4.89E-07    |
| TLR6             | mRNA    | 1.052595395 | 2.57E-05    |
| hsa_circ_0047185 | circRNA | 1.051532945 | 4.83E-07    |
| UCHL1            | mRNA    | 1.050950661 | 2.06E-05    |
| L3HYPDH          | mRNA    | 1.050185929 | 0.001275163 |
| hsa_circ_0043266 | circRNA | 1.050126898 | 5.14E-04    |
| hsa_circ_0129931 | circRNA | 1.048215719 | 1.31E-07    |
| KIAA1614         | mRNA    | 1.047985034 | 0.006070617 |
| hsa_circ_0014224 | circRNA | 1.047688831 | 3.06E-08    |
| hsa_circ_0132275 | circRNA | 1.045918291 | 5.21E-07    |
| BGIG9606_51708   | lncRNA  | 1.045851399 | 3.12E-06    |
| hsa_circ_0009049 | circRNA | 1.04550276  | 0.039945557 |
| hsa_circ_0088763 | circRNA | 1.044955417 | 5.14E-04    |
| EVA1C            | mRNA    | 1.044713059 | 4.30E-06    |
| hsa_circ_0101786 | circRNA | 1.044295383 | 0.028790513 |
| hsa_circ_0014537 | circRNA | 1.044150338 | 2.46E-12    |
| RUSC2            | mRNA    | 1.043573233 | 1.45E-06    |
| NPC1             | mRNA    | 1.04129301  | 8.33E-14    |
| hsa_circ_0037056 | circRNA | 1.040769597 | 6.66E-05    |
| hsa_circ_0136323 | circRNA | 1.040671726 | 0.042559107 |
| hsa_circ_0042123 | circRNA | 1.040424054 | 0.022495889 |
| RADIL            | mRNA    | 1.040329796 | 0.045358661 |
| hsa_circ_0029170 | circRNA | 1.039372859 | 0.048667815 |
| hsa_circ_0005595 | circRNA | 1.039209564 | 3.17E-06    |
| KANK3            | mRNA    | 1.039000213 | 2.08E-05    |

|                  |         |             |             |
|------------------|---------|-------------|-------------|
| BGIG9606_52716   | lncRNA  | 1.038949162 | 0.037215594 |
| hsa_circ_0106688 | circRNA | 1.038128623 | 0.002732866 |
| hsa_circ_0013559 | circRNA | 1.037282241 | 1.52E-07    |
| hsa_circ_0077217 | circRNA | 1.036137442 | 1.67E-04    |
| CD93             | mRNA    | 1.035443619 | 3.17E-07    |
| LOC101927472     | lncRNA  | 1.033894452 | 0.00357303  |
| hsa_circ_0075320 | circRNA | 1.03235819  | 0.025588992 |
| hsa_circ_0014539 | circRNA | 1.029443362 | 0.027586074 |
| hsa_circ_0053098 | circRNA | 1.029333664 | 2.03E-08    |
| hsa_circ_0005614 | circRNA | 1.029110975 | 0.005592985 |
| hsa_circ_0066177 | circRNA | 1.029070174 | 0.014374262 |
| hsa_circ_0003522 | circRNA | 1.028883462 | 0.003158059 |
| AK8              | mRNA    | 1.028428015 | 0.023807426 |
| hsa_circ_0022990 | circRNA | 1.028116748 | 0.032185139 |
| GPR85            | mRNA    | 1.028053417 | 0.004044952 |
| MICA             | mRNA    | 1.027592466 | 2.23E-05    |
| SLC44A4          | mRNA    | 1.027469748 | 0.034385819 |
| ZFP36            | mRNA    | 1.026841876 | 6.17E-14    |
| hsa_circ_0075324 | circRNA | 1.026121943 | 0.0480124   |
| ACTL10           | mRNA    | 1.025904777 | 5.96E-04    |
| hsa_circ_0077009 | circRNA | 1.024800785 | 9.89E-09    |
| ABCB6            | mRNA    | 1.022616293 | 3.19E-06    |
| hsa_circ_0080169 | circRNA | 1.02252059  | 0.041032602 |
| hsa_circ_0088695 | circRNA | 1.022053903 | 0.001201066 |
| hsa_circ_0051358 | circRNA | 1.020694121 | 0.03313518  |

|                  |         |             |             |
|------------------|---------|-------------|-------------|
| hsa_circ_0037398 | circRNA | 1.019984787 | 8.81E-04    |
| BGIG9606_41392   | lncRNA  | 1.019943477 | 0.003330702 |
| LINC01537        | lncRNA  | 1.019074688 | 6.16E-05    |
| hsa_circ_0013558 | circRNA | 1.01803778  | 0.03878819  |
| hsa_circ_0060832 | circRNA | 1.017582927 | 5.50E-07    |
| hsa_circ_0037057 | circRNA | 1.017191456 | 5.86E-05    |
| hsa_circ_0131036 | circRNA | 1.017131737 | 0.04148127  |
| hsa_circ_0068616 | circRNA | 1.017105961 | 0.006573202 |
| hsa_circ_0083858 | circRNA | 1.016314523 | 0.002370637 |
| TMEM104          | mRNA    | 1.016139529 | 9.83E-11    |
| LINC00941        | lncRNA  | 1.015996161 | 1.90E-04    |
| hsa_circ_0016292 | circRNA | 1.015861184 | 7.52E-06    |
| hsa_circ_0042524 | circRNA | 1.015749294 | 0.007108325 |
| hsa_circ_0028971 | circRNA | 1.015251206 | 0.026485773 |
| CDC42EP2         | mRNA    | 1.015248518 | 2.04E-08    |
| LOC105377663     | lncRNA  | 1.013325954 | 2.45E-05    |
| SEC24D           | mRNA    | 1.012840272 | 9.84E-16    |
| TBC1D2           | mRNA    | 1.012126541 | 9.50E-07    |
| hsa_circ_0045572 | circRNA | 1.011206677 | 1.21E-04    |
| hsa_circ_0069575 | circRNA | 1.010703519 | 6.64E-08    |
| hsa_circ_0098320 | circRNA | 1.010231343 | 0.007715395 |
| hsa_circ_0081343 | circRNA | 1.00819114  | 9.25E-08    |
| hsa_circ_0029569 | circRNA | 1.008168241 | 0.006837799 |
| SPAG9            | mRNA    | 1.007141318 | 5.93E-06    |
| JUND             | mRNA    | 1.006316689 | 4.93E-08    |

|                  |         |             |             |
|------------------|---------|-------------|-------------|
| hsa_circ_0058455 | circRNA | 1.005948577 | 8.08E-04    |
| hsa_circ_0134374 | circRNA | 1.005743748 | 0.032844494 |
| CORO6            | mRNA    | 1.005582562 | 0.020317805 |
| hsa_circ_0020261 | circRNA | 1.005485971 | 0.036372042 |
| hsa_circ_0042776 | circRNA | 1.003773058 | 2.32E-05    |
| NUMBL            | mRNA    | 1.003706874 | 1.42E-21    |
| PMP22            | mRNA    | 1.003323879 | 1.62E-06    |
| CCM2L            | mRNA    | 1.00325004  | 2.33E-10    |
| hsa_circ_0007202 | circRNA | 1.002895828 | 0.041032602 |
| hsa_circ_0093032 | circRNA | 1.002587874 | 0.021849267 |
| PTP4A3           | mRNA    | 1.002225943 | 0.004963257 |
| TLNRD1           | mRNA    | 1.001734675 | 2.23E-05    |
| GOLGA3           | mRNA    | 1.000769075 | 3.20E-10    |
| hsa_circ_0078265 | circRNA | 1.000442262 | 0.022741176 |
| hsa_circ_0107056 | circRNA | 1.000356989 | 6.34E-05    |
| hsa_circ_0067252 | circRNA | 1.000178705 | 1.11E-05    |
| ATP8B2           | mRNA    | 0.999586655 | 1.06E-06    |
| FAM167B          | mRNA    | 0.999051982 | 1.39E-05    |
| FAM177A1         | mRNA    | 0.998689182 | 2.16E-06    |
| TDRKH            | mRNA    | 0.998588762 | 1.36E-11    |
| hsa_circ_0118836 | circRNA | 0.997524301 | 2.07E-04    |
| hsa_circ_0042560 | circRNA | 0.997254163 | 0.029460688 |
| hsa_circ_0106838 | circRNA | 0.996289666 | 1.94E-08    |
| hsa_circ_0083862 | circRNA | 0.995945005 | 1.22E-06    |
| SLC1A1           | mRNA    | 0.995002664 | 2.55E-04    |

|                  |         |             |             |
|------------------|---------|-------------|-------------|
| CXCL16           | mRNA    | 0.994756236 | 0.007858358 |
| MCEE             | mRNA    | 0.992739702 | 3.97E-07    |
| hsa_circ_0039151 | circRNA | 0.99131498  | 0.037448212 |
| hsa_circ_0132282 | circRNA | 0.99071264  | 1.87E-09    |
| hsa_circ_0001974 | circRNA | 0.99014757  | 0.014681191 |
| hsa_circ_0097098 | circRNA | 0.990146242 | 0.010835264 |
| FDPS             | mRNA    | 0.989358031 | 7.45E-09    |
| hsa_circ_0009865 | circRNA | 0.989286261 | 0.036652909 |
| hsa_circ_0013560 | circRNA | 0.989190636 | 0.024800195 |
| GIT1             | mRNA    | 0.988994709 | 1.38E-06    |
| hsa_circ_0058353 | circRNA | 0.988105891 | 0.010176704 |
| hsa_circ_0007281 | circRNA | 0.987576554 | 3.53E-12    |
| hsa_circ_0121705 | circRNA | 0.987463768 | 0.022101168 |
| hsa_circ_0138795 | circRNA | 0.987106882 | 0.0038962   |
| hsa_circ_0083863 | circRNA | 0.98696569  | 1.58E-05    |
| hsa_circ_0127082 | circRNA | 0.98690687  | 1.46E-06    |
| hsa_circ_0083861 | circRNA | 0.986581596 | 0.020457766 |
| hsa_circ_0088692 | circRNA | 0.986085179 | 3.42E-04    |
| hsa_circ_0001216 | circRNA | 0.984887052 | 0.011743013 |
| TMEM45A          | mRNA    | 0.984841313 | 3.75E-11    |
| STXBP1           | mRNA    | 0.984765451 | 1.12E-12    |
| NRCAM            | mRNA    | 0.984150048 | 0.007854066 |
| hsa_circ_0126362 | circRNA | 0.983764714 | 4.30E-10    |
| LOC105369340     | lncRNA  | 0.983322125 | 4.71E-04    |
| hsa_circ_0060833 | circRNA | 0.983286625 | 0.024664218 |



|                  |         |             |             |
|------------------|---------|-------------|-------------|
| hsa_circ_0051742 | circRNA | 0.983041698 | 0.003402305 |
| hsa_circ_0014225 | circRNA | 0.981905041 | 5.86E-07    |
| BHLHE40          | mRNA    | 0.981294768 | 0.007432594 |
| KCNN3            | mRNA    | 0.980730873 | 0.012279772 |
| hsa_circ_0081349 | circRNA | 0.980107797 | 1.26E-16    |
| LOC105379443     | pseudo  | 0.980002617 | 0.015603411 |
| hsa_circ_0045497 | circRNA | 0.979790701 | 7.71E-08    |
| hsa_circ_0136223 | circRNA | 0.979420718 | 3.27E-08    |
| PODXL            | mRNA    | 0.979313141 | 0.012283924 |
| hsa_circ_0073992 | circRNA | 0.978529052 | 9.02E-05    |
| hsa_circ_0102479 | circRNA | 0.978500243 | 6.03E-06    |
| MARC1            | mRNA    | 0.977600804 | 0.037084333 |
| hsa_circ_0032800 | circRNA | 0.977363822 | 0.018964164 |
| hsa_circ_0020695 | circRNA | 0.977131325 | 0.024484738 |
| hsa_circ_0137954 | circRNA | 0.976479452 | 0.015428665 |
| ARID5A           | mRNA    | 0.976141677 | 0.005228332 |
| CAVIN3           | mRNA    | 0.976133164 | 3.77E-10    |
| CFAP157          | mRNA    | 0.976125567 | 0.033505673 |
| hsa_circ_0019721 | circRNA | 0.975961805 | 3.16E-08    |
| hsa_circ_0044644 | circRNA | 0.975489651 | 2.39E-05    |
| hsa_circ_0050173 | circRNA | 0.974787176 | 0.040305852 |
| hsa_circ_0009738 | circRNA | 0.974779455 | 0.002650549 |
| hsa_circ_0045498 | circRNA | 0.974498291 | 2.53E-09    |
| hsa_circ_0073759 | circRNA | 0.974368147 | 0.023592469 |
| hsa_circ_0061481 | circRNA | 0.974272365 | 7.68E-04    |

|                  |         |             |             |
|------------------|---------|-------------|-------------|
| hsa_circ_0005105 | circRNA | 0.973857995 | 0.01189572  |
| hsa_circ_0114130 | circRNA | 0.97381481  | 0.020847128 |
| hsa_circ_0069572 | circRNA | 0.972911207 | 0.008595247 |
| TM4SF18          | mRNA    | 0.971209136 | 6.54E-07    |
| CDK5R1           | mRNA    | 0.970680191 | 0.030817534 |
| S100A6           | mRNA    | 0.97051949  | 7.96E-06    |
| HSPA1A           | mRNA    | 0.969333499 | 1.75E-04    |
| MAP3K14          | mRNA    | 0.968690191 | 3.49E-08    |
| hsa_circ_0073761 | circRNA | 0.968081116 | 0.001284497 |
| hsa_circ_0106701 | circRNA | 0.96798861  | 7.50E-06    |
| hsa_circ_0112237 | circRNA | 0.967505164 | 6.63E-08    |
| SCFD2            | mRNA    | 0.965532426 | 2.03E-04    |
| hsa_circ_0100691 | circRNA | 0.965019942 | 4.14E-05    |
| hsa_circ_0019261 | circRNA | 0.964858406 | 0.00465516  |
| hsa_circ_0002259 | circRNA | 0.96453859  | 1.37E-04    |
| hsa_circ_0126361 | circRNA | 0.963670222 | 5.11E-07    |
| hsa_circ_0029577 | circRNA | 0.963426494 | 0.016523348 |
| IFFO2            | mRNA    | 0.962344515 | 0.005243241 |
| hsa_circ_0055037 | circRNA | 0.961042044 | 2.97E-07    |
| hsa_circ_0081348 | circRNA | 0.960961054 | 0.001374039 |
| BGIG9606_47018   | mRNA    | 0.960334121 | 0.046068239 |
| CHN2             | mRNA    | 0.959785492 | 5.46E-04    |
| hsa_circ_0000754 | circRNA | 0.957435702 | 0.001039131 |
| hsa_circ_0064481 | circRNA | 0.956906997 | 0.017214767 |
| hsa_circ_0069735 | circRNA | 0.956588777 | 0.004781394 |

|                  |         |             |             |
|------------------|---------|-------------|-------------|
| hsa_circ_0042781 | circRNA | 0.954463932 | 1.89E-05    |
| hsa_circ_0014540 | circRNA | 0.9543815   | 4.35E-09    |
| CCDC78           | mRNA    | 0.954182357 | 4.14E-04    |
| hsa_circ_0029580 | circRNA | 0.95360037  | 1.07E-05    |
| CLIC2            | mRNA    | 0.952841605 | 5.06E-04    |
| hsa_circ_0132274 | circRNA | 0.952657831 | 1.78E-05    |
| CDKN2D           | mRNA    | 0.952012321 | 1.02E-06    |
| hsa_circ_0107065 | circRNA | 0.951845532 | 0.045026768 |
| SELENOI          | mRNA    | 0.95168094  | 3.69E-07    |
| hsa_circ_0121827 | circRNA | 0.95074896  | 0.004836798 |
| hsa_circ_0069769 | circRNA | 0.950032105 | 0.046337313 |
| GMFG             | mRNA    | 0.949906561 | 5.92E-05    |
| hsa_circ_0106157 | circRNA | 0.946146025 | 0.003610093 |
| hsa_circ_0070246 | circRNA | 0.944763957 | 2.53E-05    |
| hsa_circ_0116896 | circRNA | 0.942900097 | 0.011198979 |
| hsa_circ_0107467 | circRNA | 0.942492394 | 1.46E-04    |
| hsa_circ_0079563 | circRNA | 0.941637537 | 4.93E-04    |
| hsa_circ_0014677 | circRNA | 0.941067598 | 7.59E-04    |
| ENTPD7           | mRNA    | 0.940954308 | 2.52E-08    |
| hsa_circ_0019258 | circRNA | 0.940777176 | 0.040164927 |
| RHOC             | mRNA    | 0.940556356 | 9.97E-05    |
| hsa_circ_0061340 | circRNA | 0.940210133 | 0.002726843 |
| B4GALT5          | mRNA    | 0.940039989 | 3.24E-04    |
| hsa_circ_0073998 | circRNA | 0.940009707 | 4.49E-05    |
| SELENOS          | mRNA    | 0.939851916 | 7.10E-11    |

|                  |         |             |             |
|------------------|---------|-------------|-------------|
| BGIG9606_40405   | lncRNA  | 0.938026764 | 0.00607777  |
| INKA2            | mRNA    | 0.937318233 | 0.048676507 |
| hsa_circ_0044639 | circRNA | 0.937104735 | 7.43E-05    |
| hsa_circ_0129924 | circRNA | 0.936315167 | 9.98E-06    |
| hsa_circ_0002863 | circRNA | 0.935372112 | 2.02E-05    |
| SMAGP            | mRNA    | 0.934937405 | 3.80E-04    |
| hsa_circ_0115414 | circRNA | 0.934854186 | 3.87E-06    |
| PLEKHG1          | mRNA    | 0.934376271 | 0.002696166 |
| hsa_circ_0067868 | circRNA | 0.933879649 | 0.040734076 |
| hsa_circ_0012028 | circRNA | 0.933787053 | 8.12E-04    |
| hsa_circ_0076027 | circRNA | 0.933608434 | 0.001671101 |
| MYLK-AS1         | lncRNA  | 0.93340089  | 2.20E-05    |
| hsa_circ_0026796 | circRNA | 0.932403061 | 3.23E-04    |
| SLC25A22         | mRNA    | 0.932131212 | 4.34E-06    |
| hsa_circ_0069581 | circRNA | 0.931437601 | 8.01E-08    |
| GRIN3B           | mRNA    | 0.9309666   | 0.013521093 |
| hsa_circ_0042026 | circRNA | 0.930901723 | 8.38E-07    |
| ACAP3            | mRNA    | 0.930855814 | 1.21E-06    |
| IQCJ-SCHIP1      | mRNA    | 0.930663159 | 0.006922209 |
| hsa_circ_0042784 | circRNA | 0.930080171 | 3.83E-06    |
| hsa_circ_0107061 | circRNA | 0.929777955 | 9.41E-05    |
| VEGFA            | mRNA    | 0.929714894 | 0.004061285 |
| hsa_circ_0043256 | circRNA | 0.929305979 | 8.78E-06    |
| MFSD12           | mRNA    | 0.929179699 | 7.16E-06    |
| hsa_circ_0134507 | circRNA | 0.928610933 | 3.09E-05    |

|                  |         |             |             |
|------------------|---------|-------------|-------------|
| hsa_circ_0044636 | circRNA | 0.928047806 | 1.35E-05    |
| hsa_circ_0071409 | circRNA | 0.92757801  | 0.00481177  |
| hsa_circ_0070757 | circRNA | 0.92732617  | 2.45E-06    |
| LOC105376325     | lncRNA  | 0.926765846 | 7.61E-07    |
| hsa_circ_0138791 | circRNA | 0.926520404 | 1.02E-04    |
| hsa_circ_0114133 | circRNA | 0.926486458 | 5.11E-07    |
| FAS              | mRNA    | 0.926060597 | 0.007342674 |
| hsa_circ_0001939 | circRNA | 0.925996918 | 0.011941083 |
| RPS6KL1          | mRNA    | 0.925911092 | 0.02509908  |
| hsa_circ_0074397 | circRNA | 0.925452365 | 0.001773835 |
| LLGL2            | mRNA    | 0.925046871 | 0.004656267 |
| ACACA            | mRNA    | 0.924891947 | 2.89E-18    |
| hsa_circ_0136222 | circRNA | 0.924315034 | 8.02E-04    |
| hsa_circ_0019260 | circRNA | 0.922842228 | 4.85E-05    |
| BCAM             | mRNA    | 0.921812975 | 4.17E-07    |
| KLF13            | mRNA    | 0.920315763 | 7.02E-11    |
| hsa_circ_0115602 | circRNA | 0.920024161 | 0.013390215 |
| hsa_circ_0065843 | circRNA | 0.919766496 | 1.42E-13    |
| LOC101448202     | lncRNA  | 0.919284961 | 0.034038154 |
| hsa_circ_0079074 | circRNA | 0.919167136 | 7.20E-05    |
| BGIG9606_55579   | lncRNA  | 0.919116634 | 0.002377666 |
| RETREG1          | mRNA    | 0.918338101 | 0.001217903 |
| hsa_circ_0014423 | circRNA | 0.918202296 | 6.39E-06    |
| PLXNA3           | mRNA    | 0.918053792 | 1.99E-24    |
| hsa_circ_0110040 | circRNA | 0.917680768 | 4.14E-06    |

|                  |         |             |             |
|------------------|---------|-------------|-------------|
| hsa_circ_0029340 | circRNA | 0.916347065 | 3.47E-04    |
| hsa_circ_0062913 | circRNA | 0.915922244 | 0.029627365 |
| DMTN             | mRNA    | 0.91572849  | 2.12E-05    |
| hsa_circ_0004518 | circRNA | 0.915638053 | 4.10E-10    |
| hsa_circ_0028958 | circRNA | 0.915476364 | 0.033399794 |
| hsa_circ_0002168 | circRNA | 0.915152042 | 7.52E-06    |
| hsa_circ_0110035 | circRNA | 0.914647623 | 0.005823041 |
| hsa_circ_0070750 | circRNA | 0.913888681 | 1.30E-04    |
| SYT17            | mRNA    | 0.913843098 | 7.78E-10    |
| EIF2AK3          | mRNA    | 0.913575981 | 5.04E-10    |
| ARHGEF15         | mRNA    | 0.913216303 | 9.57E-08    |
| hsa_circ_0132271 | circRNA | 0.91275208  | 3.50E-05    |
| hsa_circ_0060827 | circRNA | 0.912235856 | 1.28E-06    |
| RPGRIP1L         | mRNA    | 0.911914957 | 9.45E-08    |
| hsa_circ_0115098 | circRNA | 0.911579978 | 3.77E-04    |
| hsa_circ_0099712 | circRNA | 0.911538217 | 0.008514798 |
| P4HA2            | mRNA    | 0.910814821 | 1.47E-11    |
| hsa_circ_0070759 | circRNA | 0.910354432 | 8.03E-09    |
| TKT              | mRNA    | 0.909773291 | 0.005832428 |
| HLX-AS1          | lncRNA  | 0.909724845 | 0.023913629 |
| hsa_circ_0139545 | circRNA | 0.909149098 | 1.48E-04    |
| hsa_circ_0032280 | circRNA | 0.909060456 | 0.002392478 |
| ST6GALNAC3       | mRNA    | 0.908596538 | 8.45E-09    |
| hsa_circ_0062211 | circRNA | 0.908531132 | 0.022357021 |
| hsa_circ_0079636 | circRNA | 0.907100104 | 0.028790513 |

|                   |         |             |             |
|-------------------|---------|-------------|-------------|
| hsa_circ_0043230  | circRNA | 0.906914185 | 4.85E-05    |
| PCDHGA12          | mRNA    | 0.906458868 | 0.004750115 |
| hsa_circ_0011991  | circRNA | 0.906324436 | 0.029287234 |
| hsa_circ_0001025  | circRNA | 0.90577058  | 0.002499761 |
| DUSP4             | mRNA    | 0.905596028 | 0.04812195  |
| hsa_circ_0090882  | circRNA | 0.905532356 | 0.002129316 |
| hsa_circ_0045501  | circRNA | 0.904853059 | 2.91E-04    |
| hsa_circ_0100593  | circRNA | 0.904472856 | 0.017470149 |
| HELZ2             | mRNA    | 0.904382451 | 3.81E-07    |
| LLOXNC01-250H12.3 | lncRNA  | 0.904269641 | 1.27E-05    |
| hsa_circ_0043724  | circRNA | 0.904094056 | 2.23E-07    |
| SLFNL1-AS1        | lncRNA  | 0.903294569 | 0.017618328 |
| KDEL2             | mRNA    | 0.902145766 | 6.73E-07    |
| hsa_circ_0076610  | circRNA | 0.901570889 | 0.008726585 |
| GOLT1B            | mRNA    | 0.901468859 | 8.28E-06    |
| CELSR3            | mRNA    | 0.901148189 | 0.001336215 |
| hsa_circ_0008432  | circRNA | 0.900660369 | 8.63E-07    |
| hsa_circ_0105414  | circRNA | 0.900457453 | 0.002476328 |
| hsa_circ_0110972  | circRNA | 0.899382526 | 0.002194254 |
| hsa_circ_0063152  | circRNA | 0.898993806 | 0.01482698  |
| ANKRD9            | mRNA    | 0.897892833 | 4.40E-05    |
| TRIB1             | mRNA    | 0.897234172 | 0.002576756 |
| hsa_circ_0044650  | circRNA | 0.896837639 | 0.022694254 |
| hsa_circ_0003848  | circRNA | 0.896264206 | 0.002976639 |
| H1FOO             | mRNA    | 0.896237431 | 0.006589525 |

|                  |         |             |             |
|------------------|---------|-------------|-------------|
| RNF125           | mRNA    | 0.89617195  | 0.001520287 |
| hsa_circ_0080074 | circRNA | 0.894906696 | 0.008870434 |
| hsa_circ_0119219 | circRNA | 0.894744222 | 1.64E-05    |
| hsa_circ_0030562 | circRNA | 0.89416586  | 0.024296575 |
| hsa_circ_0097925 | circRNA | 0.893866181 | 7.58E-06    |
| hsa_circ_0013547 | circRNA | 0.892026258 | 0.013624672 |
| hsa_circ_0006452 | circRNA | 0.891667799 | 0.032185139 |
| hsa_circ_0084546 | circRNA | 0.891545555 | 0.021138906 |
| hsa_circ_0074547 | circRNA | 0.890873492 | 0.017418583 |
| PRR7             | mRNA    | 0.890424407 | 0.02509908  |
| GPR160           | mRNA    | 0.889708695 | 0.043795505 |
| hsa_circ_0055892 | circRNA | 0.889516023 | 0.022461612 |
| hsa_circ_0129545 | circRNA | 0.889116858 | 1.51E-04    |
| hsa_circ_0064280 | circRNA | 0.889047769 | 0.029597428 |
| hsa_circ_0088688 | circRNA | 0.888688064 | 1.18E-05    |
| hsa_circ_0007046 | circRNA | 0.888629576 | 8.29E-07    |
| RELB             | mRNA    | 0.888440298 | 0.001551521 |
| BGIG9606_39888   | lncRNA  | 0.887636457 | 0.00180502  |
| METTL1           | mRNA    | 0.887196353 | 5.31E-05    |
| hsa_circ_0106158 | circRNA | 0.88650369  | 0.004577516 |
| hsa_circ_0014676 | circRNA | 0.88631486  | 0.028956854 |
| hsa_circ_0049860 | circRNA | 0.886053227 | 1.20E-08    |
| hsa_circ_0067283 | circRNA | 0.885649836 | 8.80E-09    |
| ARL4D            | mRNA    | 0.885538441 | 1.70E-04    |
| hsa_circ_0112099 | circRNA | 0.885534929 | 0.007498735 |



|                  |         |             |             |
|------------------|---------|-------------|-------------|
| hsa_circ_0076025 | circRNA | 0.884861139 | 1.36E-04    |
| NDEL1            | mRNA    | 0.884404583 | 1.00E-10    |
| MAP3K6           | mRNA    | 0.884319624 | 2.53E-05    |
| hsa_circ_0109642 | circRNA | 0.882793462 | 5.04E-04    |
| DIAPH2           | mRNA    | 0.882691847 | 3.78E-04    |
| GFPT1            | mRNA    | 0.882285572 | 8.35E-11    |
| hsa_circ_0009007 | circRNA | 0.881014724 | 0.010837734 |
| BLZF1            | mRNA    | 0.880976977 | 5.32E-10    |
| KDR              | mRNA    | 0.879086101 | 3.19E-07    |
| hsa_circ_0136329 | circRNA | 0.878521127 | 0.022950097 |
| TMEM38A          | mRNA    | 0.878049349 | 0.020738187 |
| KLF11            | mRNA    | 0.877556331 | 1.53E-04    |
| hsa_circ_0129544 | circRNA | 0.877553087 | 4.58E-06    |
| PRRC1            | mRNA    | 0.877478493 | 1.04E-11    |
| ITPR3            | mRNA    | 0.877301469 | 0.003076417 |
| hsa_circ_0005013 | circRNA | 0.877149515 | 8.98E-09    |
| hsa_circ_0138036 | circRNA | 0.876894286 | 0.001453702 |
| hsa_circ_0090885 | circRNA | 0.876013025 | 1.33E-04    |
| hsa_circ_0036791 | circRNA | 0.875160575 | 0.020338076 |
| hsa_circ_0002914 | circRNA | 0.875144956 | 0.008676982 |
| GNE              | mRNA    | 0.874882062 | 1.20E-23    |
| hsa_circ_0008983 | circRNA | 0.874034773 | 2.79E-04    |
| hsa_circ_0008341 | circRNA | 0.873866526 | 1.60E-11    |
| hsa_circ_0056865 | circRNA | 0.873602458 | 0.004177422 |
| hsa_circ_0129546 | circRNA | 0.873558701 | 8.44E-05    |

|                  |         |             |             |
|------------------|---------|-------------|-------------|
| hsa_circ_0081340 | circRNA | 0.873473251 | 0.025484698 |
| hsa_circ_0040503 | circRNA | 0.872364155 | 0.001660892 |
| hsa_circ_0100692 | circRNA | 0.872249021 | 3.73E-04    |
| hsa_circ_0045502 | circRNA | 0.871028862 | 2.57E-05    |
| TBC1D8B          | mRNA    | 0.871017129 | 1.49E-08    |
| hsa_circ_0073997 | circRNA | 0.869614956 | 0.014975604 |
| APOL6            | mRNA    | 0.869548472 | 1.47E-06    |
| hsa_circ_0054535 | circRNA | 0.869159824 | 4.44E-04    |
| TRIM2            | mRNA    | 0.869125075 | 0.010463489 |
| hsa_circ_0127098 | circRNA | 0.868628699 | 4.03E-06    |
| LIPG             | mRNA    | 0.868547512 | 7.75E-07    |
| hsa_circ_0004868 | circRNA | 0.868140152 | 2.51E-04    |
| hsa_circ_0083751 | circRNA | 0.86798539  | 0.004244552 |
| PDLIM3           | mRNA    | 0.867126563 | 0.022638611 |
| TMTC1            | mRNA    | 0.867061463 | 0.029000407 |
| hsa_circ_0136225 | circRNA | 0.866989915 | 5.32E-07    |
| hsa_circ_0014422 | circRNA | 0.866963268 | 0.001714066 |
| TSKU             | mRNA    | 0.866788546 | 1.43E-05    |
| hsa_circ_0127083 | circRNA | 0.866135037 | 3.03E-05    |
| SULT1A4          | mRNA    | 0.865170687 | 0.001340991 |
| hsa_circ_0002071 | circRNA | 0.865082072 | 0.02856605  |
| LRR3             | mRNA    | 0.864761761 | 2.21E-08    |
| NOCT             | mRNA    | 0.864305192 | 0.00667866  |
| KLHL5            | mRNA    | 0.862734086 | 0.003179779 |
| hsa_circ_0032520 | circRNA | 0.862620218 | 3.35E-04    |

|                  |         |             |             |
|------------------|---------|-------------|-------------|
| hsa_circ_0050974 | circRNA | 0.862131623 | 0.001476785 |
| CALM1            | mRNA    | 0.860244463 | 2.17E-10    |
| hsa_circ_0034083 | circRNA | 0.860223709 | 0.008283971 |
| MRAS             | mRNA    | 0.859978891 | 0.002858281 |
| hsa_circ_0106161 | circRNA | 0.859669002 | 0.015693019 |
| UGDH             | mRNA    | 0.859482215 | 8.15E-07    |
| ADAMTS9-AS1      | lncRNA  | 0.85909489  | 0.00285412  |
| LOC107984338     | lncRNA  | 0.858798553 | 0.001699381 |
| hsa_circ_0099658 | circRNA | 0.858655854 | 0.004991829 |
| CCND1            | mRNA    | 0.858627762 | 0.010119556 |
| hsa_circ_0070254 | circRNA | 0.858623912 | 7.04E-06    |
| hsa_circ_0138033 | circRNA | 0.858083223 | 4.54E-05    |
| hsa_circ_0095124 | circRNA | 0.857556139 | 0.016929527 |
| hsa_circ_0014679 | circRNA | 0.857364954 | 2.22E-07    |
| hsa_circ_0090894 | circRNA | 0.857131145 | 0.015427171 |
| ZBTB47           | mRNA    | 0.856414945 | 9.24E-10    |
| ADAMTSL4         | mRNA    | 0.855524718 | 0.018594778 |
| hsa_circ_0038985 | circRNA | 0.855425371 | 0.005091733 |
| hsa_circ_0045496 | circRNA | 0.855285469 | 3.96E-07    |
| BGIG9606_66354   | lncRNA  | 0.855232406 | 0.003907148 |
| hsa_circ_0050587 | circRNA | 0.854855209 | 3.70E-04    |
| hsa_circ_0102480 | circRNA | 0.854739483 | 0.00140294  |
| LMO7             | mRNA    | 0.854695136 | 0.020599882 |
| hsa_circ_0128562 | circRNA | 0.85405568  | 0.014613435 |
| hsa_circ_0081338 | circRNA | 0.853968308 | 8.36E-05    |

|                  |         |             |             |
|------------------|---------|-------------|-------------|
| hsa_circ_0129538 | circRNA | 0.852303824 | 0.002823004 |
| hsa_circ_0005192 | circRNA | 0.851881911 | 0.014143391 |
| DOCK6            | mRNA    | 0.851844032 | 1.39E-04    |
| RHBDF2           | mRNA    | 0.850722002 | 0.002131477 |
| ARPC1B           | mRNA    | 0.850715711 | 5.63E-16    |
| hsa_circ_0008163 | circRNA | 0.8506771   | 2.56E-08    |
| hsa_circ_0013556 | circRNA | 0.850649714 | 1.11E-06    |
| hsa_circ_0061151 | circRNA | 0.849374804 | 2.68E-04    |
| MAFF             | mRNA    | 0.848931506 | 0.015662256 |
| hsa_circ_0061103 | circRNA | 0.848400275 | 0.030950515 |
| KCNK6            | mRNA    | 0.848172507 | 8.77E-06    |
| hsa_circ_0076019 | circRNA | 0.847614949 | 0.00543788  |
| hsa_circ_0127091 | circRNA | 0.847519031 | 1.32E-04    |
| hsa_circ_0049861 | circRNA | 0.84734933  | 1.33E-09    |
| hsa_circ_0002357 | circRNA | 0.846926671 | 2.52E-06    |
| hsa_circ_0116440 | circRNA | 0.846418863 | 1.66E-04    |
| hsa_circ_0040848 | circRNA | 0.845800626 | 0.018043986 |
| hsa_circ_0025293 | circRNA | 0.845352844 | 1.58E-05    |
| hsa_circ_0047779 | circRNA | 0.845300314 | 0.01670908  |
| hsa_circ_0049857 | circRNA | 0.844805533 | 9.44E-05    |
| SH3PXD2A         | mRNA    | 0.844670142 | 0.004502689 |
| hsa_circ_0054562 | circRNA | 0.844440922 | 0.033935026 |
| hsa_circ_0063602 | circRNA | 0.844068636 | 4.24E-04    |
| PALM             | mRNA    | 0.843567177 | 0.0016953   |
| hsa_circ_0016291 | circRNA | 0.84308493  | 0.015843294 |

|                  |         |             |             |
|------------------|---------|-------------|-------------|
| hsa_circ_0030187 | circRNA | 0.843030049 | 0.034098996 |
| hsa_circ_0003716 | circRNA | 0.842814938 | 0.002783223 |
| EHD3             | mRNA    | 0.842204649 | 6.34E-04    |
| POLR3D           | mRNA    | 0.840142547 | 4.07E-08    |
| hsa_circ_0013549 | circRNA | 0.839804478 | 8.23E-04    |
| hsa_circ_0083214 | circRNA | 0.839657895 | 1.89E-05    |
| IDH1             | mRNA    | 0.839217707 | 1.44E-09    |
| SLC46A1          | mRNA    | 0.839187709 | 0.001764044 |
| SPRYD7           | mRNA    | 0.838790263 | 4.03E-05    |
| hsa_circ_0136075 | circRNA | 0.838504293 | 0.011104283 |
| LOC284454        | lncRNA  | 0.838249047 | 0.009193191 |
| GIPC3            | mRNA    | 0.838106537 | 0.001993163 |
| MAFG             | mRNA    | 0.83734305  | 6.50E-04    |
| hsa_circ_0007940 | circRNA | 0.837228478 | 3.76E-12    |
| PPM1F            | mRNA    | 0.837147059 | 9.39E-06    |
| UFSP1            | mRNA    | 0.836770122 | 0.037534028 |
| hsa_circ_0067422 | circRNA | 0.836721265 | 0.020485242 |
| hsa_circ_0043250 | circRNA | 0.836512353 | 5.91E-05    |
| hsa_circ_0081339 | circRNA | 0.835900834 | 4.52E-09    |
| hsa_circ_0121134 | circRNA | 0.835731069 | 0.007101278 |
| hsa_circ_0129523 | circRNA | 0.835323697 | 9.51E-04    |
| PTGER4           | mRNA    | 0.835315516 | 0.002889586 |
| hsa_circ_0107811 | circRNA | 0.835081154 | 1.05E-06    |
| hsa_circ_0059406 | circRNA | 0.834161874 | 0.014917608 |
| hsa_circ_0064274 | circRNA | 0.833626076 | 5.21E-10    |

|                  |         |             |             |
|------------------|---------|-------------|-------------|
| ARL1             | mRNA    | 0.833374752 | 4.27E-09    |
| hsa_circ_0127081 | circRNA | 0.832848962 | 0.007220825 |
| hsa_circ_0132626 | circRNA | 0.832421907 | 0.018204327 |
| hsa_circ_0074003 | circRNA | 0.832011667 | 9.41E-05    |
| hsa_circ_0052674 | circRNA | 0.83186149  | 0.004632907 |
| hsa_circ_0026173 | circRNA | 0.830818949 | 8.58E-04    |
| PMM2             | mRNA    | 0.830537602 | 8.37E-07    |
| hsa_circ_0125299 | circRNA | 0.830266227 | 0.047695988 |
| CAMKK1           | mRNA    | 0.829850824 | 0.018594778 |
| hsa_circ_0088562 | circRNA | 0.829709934 | 0.021696929 |
| hsa_circ_0136212 | circRNA | 0.829366051 | 0.001857811 |
| hsa_circ_0029579 | circRNA | 0.829359407 | 0.027724654 |
| hsa_circ_0016703 | circRNA | 0.828230386 | 9.78E-05    |
| STN1             | mRNA    | 0.828145162 | 0.003179779 |
| hsa_circ_0004086 | circRNA | 0.827995589 | 8.61E-06    |
| YEATS2-AS1       | lncRNA  | 0.827855258 | 0.044270253 |
| SPRYD3           | mRNA    | 0.827041044 | 4.86E-12    |
| hsa_circ_0069771 | circRNA | 0.825399397 | 1.57E-05    |
| hsa_circ_0073754 | circRNA | 0.824778781 | 8.13E-06    |
| SSH1             | mRNA    | 0.823552118 | 3.18E-04    |
| LOC100996660     | lncRNA  | 0.82317504  | 1.91E-07    |
| HSPB8            | mRNA    | 0.823140251 | 9.21E-05    |
| hsa_circ_0067261 | circRNA | 0.821890015 | 4.32E-05    |
| SH3PXD2B         | mRNA    | 0.821772447 | 0.001954715 |
| LOC102724193     | lncRNA  | 0.821682049 | 0.045514509 |

|                  |         |             |             |
|------------------|---------|-------------|-------------|
| hsa_circ_0003374 | circRNA | 0.821397347 | 9.71E-05    |
| hsa_circ_0108929 | circRNA | 0.821194139 | 0.006550969 |
| hsa_circ_0004253 | circRNA | 0.82087749  | 6.62E-06    |
| SLC35A2          | mRNA    | 0.820456225 | 1.43E-05    |
| SEC13            | mRNA    | 0.819873636 | 1.87E-07    |
| LMNA             | mRNA    | 0.819738739 | 6.15E-04    |
| hsa_circ_0067282 | circRNA | 0.819530447 | 4.11E-11    |
| GOLGA2           | mRNA    | 0.819522406 | 1.88E-15    |
| MLKL             | mRNA    | 0.819212129 | 6.22E-07    |
| ARFGAP1          | mRNA    | 0.8190769   | 5.32E-10    |
| hsa_circ_0065846 | circRNA | 0.818754126 | 0.002108123 |
| hsa_circ_0055051 | circRNA | 0.81811993  | 7.24E-05    |
| hsa_circ_0029336 | circRNA | 0.818093553 | 1.26E-04    |
| TCTEX1D1         | mRNA    | 0.817692813 | 5.90E-04    |
| YWHAH            | mRNA    | 0.816834581 | 2.58E-05    |
| hsa_circ_0066181 | circRNA | 0.8163821   | 2.60E-04    |
| BGIG9606_51347   | lncRNA  | 0.816080104 | 0.013949671 |
| hsa_circ_0070998 | circRNA | 0.815220049 | 2.35E-04    |
| MEF2C            | mRNA    | 0.814950197 | 2.17E-04    |
| MED8             | mRNA    | 0.814927668 | 5.19E-08    |
| hsa_circ_0076323 | circRNA | 0.81421903  | 4.45E-04    |
| SLC27A3          | mRNA    | 0.813987504 | 7.51E-07    |
| PGM3             | mRNA    | 0.813765312 | 1.01E-07    |
| hsa_circ_0055883 | circRNA | 0.812851397 | 0.041070799 |
| ACBD3            | mRNA    | 0.812708979 | 3.34E-12    |

|                  |         |             |             |
|------------------|---------|-------------|-------------|
| hsa_circ_0110037 | circRNA | 0.812380383 | 0.045499205 |
| hsa_circ_0004682 | circRNA | 0.812328029 | 0.006553758 |
| SCARB1           | mRNA    | 0.812189043 | 3.74E-06    |
| COPG1            | mRNA    | 0.811943637 | 1.28E-09    |
| FUS              | mRNA    | 0.811571717 | 9.83E-08    |
| WIPI1            | mRNA    | 0.811266029 | 3.27E-09    |
| hsa_circ_0090890 | circRNA | 0.811029291 | 0.012309371 |
| JAK3             | mRNA    | 0.811001584 | 0.001171346 |
| DLGAP1-AS1       | lncRNA  | 0.810190788 | 3.89E-04    |
| GPR180           | mRNA    | 0.809881895 | 1.38E-05    |
| ACSL3            | mRNA    | 0.809694145 | 1.61E-06    |
| hsa_circ_0103280 | circRNA | 0.809113787 | 8.31E-05    |
| SELENOM          | mRNA    | 0.808990068 | 5.05E-04    |
| SLFN11           | mRNA    | 0.80868095  | 4.93E-11    |
| hsa_circ_0081345 | circRNA | 0.808325032 | 0.035160387 |
| SH3RF3           | mRNA    | 0.808101689 | 1.72E-06    |
| hsa_circ_0070241 | circRNA | 0.808022607 | 9.63E-05    |
| hsa_circ_0060807 | circRNA | 0.807709156 | 0.002811776 |
| hsa_circ_0073978 | circRNA | 0.807357219 | 5.12E-04    |
| hsa_circ_0083983 | circRNA | 0.806755164 | 0.03687346  |
| SLCO3A1          | mRNA    | 0.806365942 | 0.009976802 |
| MICA-AS1         | lncRNA  | 0.806355327 | 0.00697635  |
| MINDY2           | mRNA    | 0.806211801 | 1.32E-14    |
| HEG1             | mRNA    | 0.806183089 | 1.50E-04    |
| hsa_circ_0067281 | circRNA | 0.806123934 | 1.74E-04    |



|                  |         |             |             |
|------------------|---------|-------------|-------------|
| hsa_circ_0044646 | circRNA | 0.805906327 | 3.86E-04    |
| SCN1B            | mRNA    | 0.804937102 | 3.46E-07    |
| hsa_circ_0117005 | circRNA | 0.803353194 | 0.003413311 |
| hsa_circ_0102842 | circRNA | 0.802844637 | 0.045958912 |
| RDH11            | mRNA    | 0.802184105 | 2.90E-07    |
| SH2D3C           | mRNA    | 0.802050304 | 0.001245267 |
| SMCO4            | mRNA    | 0.802026983 | 6.09E-06    |
| hsa_circ_0120814 | circRNA | 0.800788021 | 1.01E-05    |
| hsa_circ_0042844 | circRNA | 0.800739823 | 0.007524425 |
| hsa_circ_0029887 | circRNA | 0.799976557 | 0.006298437 |
| ELOVL1           | mRNA    | 0.799958513 | 2.09E-10    |
| FAM151B          | mRNA    | 0.79983788  | 0.002073748 |
| hsa_circ_0077832 | circRNA | 0.799623477 | 0.032024714 |
| hsa_circ_0031707 | circRNA | 0.79962326  | 0.012984201 |
| hsa_circ_0029421 | circRNA | 0.799107328 | 0.014164086 |
| CCDC69           | mRNA    | 0.798605272 | 8.48E-04    |
| MSTO2P           | pseudo  | 0.798572669 | 0.006320156 |
| OSBPL3           | mRNA    | 0.797867392 | 0.003979019 |
| SPRED3           | mRNA    | 0.797699548 | 1.73E-05    |
| hsa_circ_0120818 | circRNA | 0.797487599 | 9.97E-06    |
| hsa_circ_0088720 | circRNA | 0.796948426 | 0.018417482 |
| hsa_circ_0053112 | circRNA | 0.796656528 | 1.27E-04    |
| hsa_circ_0081342 | circRNA | 0.796131968 | 6.27E-09    |
| hsa_circ_0018637 | circRNA | 0.796087419 | 6.76E-05    |
| hsa_circ_0073976 | circRNA | 0.795843736 | 1.05E-04    |

|                  |         |             |             |
|------------------|---------|-------------|-------------|
| hsa_circ_0076627 | circRNA | 0.794576109 | 0.030703325 |
| hsa_circ_0127917 | circRNA | 0.793997052 | 0.01126407  |
| CPNE8            | mRNA    | 0.793994302 | 8.80E-06    |
| hsa_circ_0004299 | circRNA | 0.793605494 | 3.98E-07    |
| JMJD6            | mRNA    | 0.793386826 | 7.61E-07    |
| DLL1             | mRNA    | 0.793316547 | 1.38E-04    |
| hsa_circ_0062889 | circRNA | 0.791808913 | 0.042824532 |
| TMEM184B         | mRNA    | 0.791767725 | 1.55E-07    |
| MPV17L           | mRNA    | 0.79140192  | 0.022718794 |
| SLC48A1          | mRNA    | 0.791014416 | 0.001912902 |
| hsa_circ_0003948 | circRNA | 0.790994337 | 1.72E-06    |
| ARFGEF3          | mRNA    | 0.790833977 | 3.63E-09    |
| hsa_circ_0127092 | circRNA | 0.79032782  | 0.002534451 |
| hsa_circ_0102840 | circRNA | 0.789793363 | 1.56E-05    |
| hsa_circ_0031716 | circRNA | 0.789350594 | 0.00161381  |
| hsa_circ_0090888 | circRNA | 0.788880548 | 5.66E-05    |
| hsa_circ_0049432 | circRNA | 0.788615291 | 0.001707158 |
| hsa_circ_0070245 | circRNA | 0.786323426 | 1.13E-09    |
| DAGLA            | mRNA    | 0.786316743 | 0.01070261  |
| hsa_circ_0055061 | circRNA | 0.785862591 | 2.10E-04    |
| CFAP410          | mRNA    | 0.785414038 | 1.38E-06    |
| hsa_circ_0004345 | circRNA | 0.785117963 | 1.00E-05    |
| hsa_circ_0059948 | circRNA | 0.785027109 | 0.01677778  |
| BGIG9606_51524   | lncRNA  | 0.784443547 | 0.039888404 |
| PITPNM2          | mRNA    | 0.783680757 | 1.06E-04    |

|                  |         |             |             |
|------------------|---------|-------------|-------------|
| hsa_circ_0082184 | circRNA | 0.782981921 | 7.12E-04    |
| hsa_circ_0064821 | circRNA | 0.782851583 | 0.04917849  |
| hsa_circ_0127097 | circRNA | 0.78206241  | 7.34E-04    |
| TXN              | mRNA    | 0.781473002 | 0.001673676 |
| DNAJC25          | mRNA    | 0.781405307 | 4.02E-06    |
| FAM219A          | mRNA    | 0.780929484 | 5.57E-04    |
| hsa_circ_0067278 | circRNA | 0.780289981 | 6.96E-08    |
| hsa_circ_0007629 | circRNA | 0.779516898 | 0.014069396 |
| hsa_circ_0044582 | circRNA | 0.779219717 | 4.21E-05    |
| hsa_circ_0039957 | circRNA | 0.778192966 | 0.014941229 |
| ICAM1            | mRNA    | 0.777756526 | 0.009404888 |
| hsa_circ_0128012 | circRNA | 0.777219278 | 3.76E-05    |
| hsa_circ_0136218 | circRNA | 0.777125906 | 0.001607515 |
| hsa_circ_0124912 | circRNA | 0.777045379 | 0.014554396 |
| FTH1             | mRNA    | 0.77640812  | 0.006905957 |
| hsa_circ_0054577 | circRNA | 0.775660591 | 0.048524329 |
| BSN              | mRNA    | 0.774940822 | 0.008281368 |
| hsa_circ_0019257 | circRNA | 0.774509824 | 6.58E-04    |
| hsa_circ_0070250 | circRNA | 0.774499384 | 2.97E-04    |
| hsa_circ_0048507 | circRNA | 0.773105691 | 0.041671584 |
| hsa_circ_0070249 | circRNA | 0.772925522 | 2.07E-04    |
| hsa_circ_0068629 | circRNA | 0.77144635  | 0.006056351 |
| hsa_circ_0112129 | circRNA | 0.770749698 | 0.033132085 |
| MID1IP1          | mRNA    | 0.770708443 | 0.002368739 |
| hsa_circ_0079037 | circRNA | 0.770438348 | 0.019117274 |

|                  |         |             |             |
|------------------|---------|-------------|-------------|
| hsa_circ_0031708 | circRNA | 0.76967712  | 7.25E-04    |
| hsa_circ_0114987 | circRNA | 0.769580849 | 3.59E-04    |
| TMEM106A         | mRNA    | 0.769312879 | 0.001149992 |
| hsa_circ_0000684 | circRNA | 0.768486299 | 0.002289291 |
| hsa_circ_0003908 | circRNA | 0.766831848 | 4.54E-07    |
| CLIC4            | mRNA    | 0.766592581 | 4.57E-05    |
| MX1              | mRNA    | 0.766016029 | 0.023490021 |
| hsa_circ_0049269 | circRNA | 0.765925034 | 0.009295291 |
| hsa_circ_0037515 | circRNA | 0.765924481 | 0.00342596  |
| hsa_circ_0068636 | circRNA | 0.765637264 | 0.018382168 |
| TAGLN2           | mRNA    | 0.765403263 | 0.002534086 |
| hsa_circ_0119173 | circRNA | 0.765115612 | 0.044376405 |
| hsa_circ_0101729 | circRNA | 0.764998051 | 0.001669438 |
| LPIN1            | mRNA    | 0.764321784 | 0.001280216 |
| hsa_circ_0024577 | circRNA | 0.76422528  | 2.18E-07    |
| hsa_circ_0039955 | circRNA | 0.764175961 | 0.001225292 |
| hsa_circ_0031556 | circRNA | 0.764011001 | 0.022405658 |
| hsa_circ_0121735 | circRNA | 0.763787577 | 0.00668646  |
| LOC389641        | lncRNA  | 0.763749905 | 8.94E-05    |
| ALDH18A1         | mRNA    | 0.763465262 | 8.62E-06    |
| hsa_circ_0029335 | circRNA | 0.763382553 | 0.007598335 |
| hsa_circ_0005773 | circRNA | 0.763132027 | 0.010490103 |
| GPR68            | mRNA    | 0.762128745 | 0.023899157 |
| hsa_circ_0068431 | circRNA | 0.761775481 | 0.035276261 |
| hsa_circ_0024815 | circRNA | 0.761713784 | 5.22E-05    |

|                  |         |             |             |
|------------------|---------|-------------|-------------|
| hsa_circ_0079068 | circRNA | 0.761573933 | 9.42E-05    |
| hsa_circ_0033579 | circRNA | 0.761534643 | 4.20E-05    |
| SAMD14           | mRNA    | 0.761517423 | 5.20E-05    |
| hsa_circ_0049438 | circRNA | 0.760901655 | 0.001298463 |
| CEACAM19         | mRNA    | 0.759490407 | 0.00857795  |
| ABCA3            | mRNA    | 0.759405386 | 6.56E-17    |
| hsa_circ_0006278 | circRNA | 0.758723498 | 9.89E-05    |
| hsa_circ_0128606 | circRNA | 0.758573855 | 0.017590664 |
| CHST11           | mRNA    | 0.758539192 | 3.69E-05    |
| hsa_circ_0039153 | circRNA | 0.758022259 | 1.08E-04    |
| hsa_circ_0106690 | circRNA | 0.75792877  | 0.018289837 |
| PLK3             | mRNA    | 0.757797972 | 1.73E-05    |
| LOC107986119     | lncRNA  | 0.757304522 | 0.00117184  |
| SEC24A           | mRNA    | 0.756983861 | 4.23E-08    |
| GCH1             | mRNA    | 0.756909367 | 5.13E-04    |
| hsa_circ_0025869 | circRNA | 0.756715955 | 0.038476902 |
| CRIP2            | mRNA    | 0.756627921 | 1.46E-06    |
| hsa_circ_0028088 | circRNA | 0.756549864 | 0.040697088 |
| SLC35G2          | mRNA    | 0.755770063 | 3.31E-05    |
| hsa_circ_0102931 | circRNA | 0.75472672  | 1.49E-05    |
| GOLIM4           | mRNA    | 0.753408748 | 4.28E-09    |
| hsa_circ_0138040 | circRNA | 0.753251737 | 0.007981522 |
| hsa_circ_0064085 | circRNA | 0.753037261 | 0.001111378 |
| SRPRB            | mRNA    | 0.752890515 | 1.19E-05    |
| FAM214B          | mRNA    | 0.752811595 | 6.66E-05    |

|                  |         |             |             |
|------------------|---------|-------------|-------------|
| hsa_circ_0022417 | circRNA | 0.752256901 | 0.030415478 |
| hsa_circ_0002671 | circRNA | 0.751854608 | 2.68E-05    |
| CRACR2A          | mRNA    | 0.751451239 | 2.13E-04    |
| hsa_circ_0054558 | circRNA | 0.751310437 | 4.00E-04    |
| hsa_circ_0020536 | circRNA | 0.751256286 | 0.001021989 |
| hsa_circ_0007307 | circRNA | 0.751133882 | 0.03169328  |
| hsa_circ_0024480 | circRNA | 0.750525008 | 0.003324172 |
| SLC52A2          | mRNA    | 0.750435038 | 1.90E-06    |
| FAM129A          | mRNA    | 0.749863986 | 0.006771665 |
| FAM98A           | mRNA    | 0.749646636 | 7.83E-07    |
| ERLEC1           | mRNA    | 0.749540547 | 9.19E-07    |
| MTHFD2           | mRNA    | 0.749268261 | 0.00117184  |
| SRPRA            | mRNA    | 0.748963675 | 5.60E-05    |
| hsa_circ_0070242 | circRNA | 0.748937234 | 0.001070405 |
| MUC1             | mRNA    | 0.747939734 | 0.030700405 |
| hsa_circ_0024477 | circRNA | 0.747703632 | 4.03E-07    |
| GLUD1P3          | pseudo  | 0.747610412 | 0.013501893 |
| hsa_circ_0112295 | circRNA | 0.74751859  | 4.18E-05    |
| NFKBIZ           | mRNA    | 0.747141606 | 0.002190346 |
| hsa_circ_0019259 | circRNA | 0.74666624  | 7.92E-04    |
| GPR135           | mRNA    | 0.746661757 | 0.00637838  |
| hsa_circ_0067554 | circRNA | 0.746408316 | 0.03313518  |
| LOC220729        | pseudo  | 0.745790994 | 1.95E-04    |
| hsa_circ_0128558 | circRNA | 0.745584105 | 9.80E-06    |
| PANK3            | mRNA    | 0.744992718 | 3.51E-07    |

|                  |         |             |             |
|------------------|---------|-------------|-------------|
| hsa_circ_0069442 | circRNA | 0.744862765 | 0.001491875 |
| ICAM3            | mRNA    | 0.744329712 | 0.002629531 |
| hsa_circ_0002018 | circRNA | 0.744305549 | 0.029825338 |
| QPCT             | mRNA    | 0.743916946 | 8.70E-04    |
| hsa_circ_0059702 | circRNA | 0.743883773 | 4.36E-04    |
| BAG3             | mRNA    | 0.743407252 | 5.66E-06    |
| hsa_circ_0063287 | circRNA | 0.743388957 | 1.00E-05    |
| hsa_circ_0031724 | circRNA | 0.743236995 | 4.16E-05    |
| RAC3             | mRNA    | 0.743150858 | 7.86E-05    |
| STIM2            | mRNA    | 0.742623324 | 3.89E-04    |
| hsa_circ_0026240 | circRNA | 0.742620215 | 0.020092096 |
| SRA1             | mRNA    | 0.74227553  | 5.46E-05    |
| hsa_circ_0116682 | circRNA | 0.741924607 | 0.014583421 |
| hsa_circ_0121694 | circRNA | 0.741859451 | 0.01048376  |
| B3GAT3           | mRNA    | 0.740858462 | 8.57E-04    |
| hsa_circ_0029332 | circRNA | 0.740014011 | 5.13E-04    |
| hsa_circ_0014202 | circRNA | 0.739090234 | 0.036474997 |
| PPRC1            | mRNA    | 0.738770271 | 1.44E-04    |
| hsa_circ_0062448 | circRNA | 0.738518525 | 3.76E-05    |
| hsa_circ_0083750 | circRNA | 0.737979568 | 1.12E-04    |
| hsa_circ_0033623 | circRNA | 0.737641385 | 0.005535562 |
| hsa_circ_0006543 | circRNA | 0.737558487 | 0.008433191 |
| TMEM214          | mRNA    | 0.737504615 | 5.37E-08    |
| hsa_circ_0079564 | circRNA | 0.737254914 | 0.012803994 |
| ACSL5            | mRNA    | 0.736967793 | 0.001486947 |

|                  |         |             |             |
|------------------|---------|-------------|-------------|
| DZIP1L           | mRNA    | 0.736104057 | 0.014672213 |
| hsa_circ_0049864 | circRNA | 0.735699721 | 4.35E-09    |
| hsa_circ_0128441 | circRNA | 0.735598585 | 0.047636836 |
| hsa_circ_0060575 | circRNA | 0.735492797 | 0.047934229 |
| CRNDE            | mRNA    | 0.735251806 | 0.033509526 |
| P2RY1            | mRNA    | 0.734749874 | 0.002105837 |
| DBI              | mRNA    | 0.734028851 | 1.05E-04    |
| FTL              | mRNA    | 0.733883837 | 0.026751008 |
| ST3GAL1          | mRNA    | 0.733185927 | 5.92E-05    |
| hsa_circ_0067013 | circRNA | 0.732656297 | 0.008899928 |
| FLVCR1           | mRNA    | 0.732479425 | 0.025368155 |
| CHSY3            | mRNA    | 0.7318117   | 0.003418494 |
| hsa_circ_0074542 | circRNA | 0.731481391 | 0.006385675 |
| PTPRN2           | mRNA    | 0.731448519 | 7.07E-05    |
| hsa_circ_0004559 | circRNA | 0.731147082 | 0.045026768 |
| hsa_circ_0029006 | circRNA | 0.730724227 | 0.046053873 |
| hsa_circ_0139546 | circRNA | 0.730637932 | 8.39E-04    |
| hsa_circ_0071386 | circRNA | 0.730450137 | 0.0184085   |
| hsa_circ_0050394 | circRNA | 0.729495399 | 0.012229252 |
| hsa_circ_0016306 | circRNA | 0.727947343 | 0.010678106 |
| SNHG20           | lncRNA  | 0.727789783 | 0.034560579 |
| hsa_circ_0101550 | circRNA | 0.727591415 | 0.032933255 |
| LRRRC59          | mRNA    | 0.727233165 | 0.001437247 |
| hsa_circ_0005609 | circRNA | 0.726923107 | 5.76E-06    |
| hsa_circ_0081344 | circRNA | 0.726155911 | 0.01710763  |



|                  |         |             |             |
|------------------|---------|-------------|-------------|
| PLEKHO2          | mRNA    | 0.725979671 | 2.32E-05    |
| hsa_circ_0031651 | circRNA | 0.72559348  | 0.046964637 |
| hsa_circ_0079075 | circRNA | 0.725581394 | 5.73E-06    |
| hsa_circ_0133939 | circRNA | 0.724913072 | 0.020342608 |
| hsa_circ_0063635 | circRNA | 0.724803226 | 0.012301819 |
| hsa_circ_0051808 | circRNA | 0.724776846 | 1.17E-04    |
| hsa_circ_0048486 | circRNA | 0.724443073 | 0.034859647 |
| hsa_circ_0064277 | circRNA | 0.723514423 | 0.006946309 |
| hsa_circ_0061105 | circRNA | 0.723198285 | 0.014619524 |
| LOC100286925     | lncRNA  | 0.722612941 | 0.002218247 |
| hsa_circ_0003762 | circRNA | 0.721830524 | 0.00826626  |
| hsa_circ_0050585 | circRNA | 0.721725713 | 1.11E-06    |
| hsa_circ_0032763 | circRNA | 0.721616884 | 0.009775389 |
| hsa_circ_0079320 | circRNA | 0.721383909 | 0.027618871 |
| hsa_circ_0007129 | circRNA | 0.721347423 | 0.029828008 |
| hsa_circ_0000058 | circRNA | 0.721215573 | 5.24E-04    |
| hsa_circ_0014859 | circRNA | 0.721073516 | 1.01E-05    |
| hsa_circ_0054563 | circRNA | 0.721055314 | 0.039914779 |
| hsa_circ_0037516 | circRNA | 0.720894067 | 0.001051865 |
| hsa_circ_0036202 | circRNA | 0.720874906 | 0.001993681 |
| hsa_circ_0031368 | circRNA | 0.720669514 | 0.001317067 |
| CSF2RB           | mRNA    | 0.720145849 | 3.39E-07    |
| TFRC             | mRNA    | 0.719974444 | 0.00746706  |
| hsa_circ_0067259 | circRNA | 0.719403945 | 0.003989981 |
| PPP2R5B          | mRNA    | 0.719394639 | 3.73E-04    |

|                  |         |             |             |
|------------------|---------|-------------|-------------|
| hsa_circ_0003808 | circRNA | 0.719064106 | 8.33E-04    |
| hsa_circ_0062875 | circRNA | 0.718981941 | 0.005931012 |
| SLC4A5           | mRNA    | 0.717774435 | 0.002541536 |
| SLC25A45         | mRNA    | 0.717375118 | 1.54E-04    |
| SRP54            | mRNA    | 0.717324498 | 1.61E-04    |
| hsa_circ_0087501 | circRNA | 0.717075205 | 0.046740573 |
| hsa_circ_0089922 | circRNA | 0.71707198  | 2.49E-05    |
| MAP1B            | mRNA    | 0.716811964 | 0.001892441 |
| hsa_circ_0023882 | circRNA | 0.716152276 | 0.025472333 |
| MCAM             | mRNA    | 0.716067055 | 1.32E-05    |
| CALU             | mRNA    | 0.716011691 | 2.38E-06    |
| hsa_circ_0090901 | circRNA | 0.715274514 | 2.39E-05    |
| UBALD2           | mRNA    | 0.715236624 | 1.53E-04    |
| hsa_circ_0129527 | circRNA | 0.715233016 | 1.44E-04    |
| hsa_circ_0021886 | circRNA | 0.715011056 | 8.71E-04    |
| ATG9B            | mRNA    | 0.714318787 | 0.021786055 |
| hsa_circ_0090887 | circRNA | 0.714075961 | 0.011675637 |
| ACSS2            | mRNA    | 0.713213219 | 0.00211629  |
| hsa_circ_0107786 | circRNA | 0.712633184 | 0.001045777 |
| ELMSAN1          | mRNA    | 0.712627054 | 0.001332857 |
| TPM4             | mRNA    | 0.712563221 | 4.25E-10    |
| hsa_circ_0049428 | circRNA | 0.712479691 | 0.007455409 |
| CEP85            | mRNA    | 0.712375083 | 0.005603892 |
| hsa_circ_0025415 | circRNA | 0.712158137 | 0.003078231 |
| hsa_circ_0028845 | circRNA | 0.712082201 | 0.010837734 |

|                  |         |             |             |
|------------------|---------|-------------|-------------|
| hsa_circ_0126264 | circRNA | 0.711419466 | 9.22E-04    |
| hsa_circ_0050911 | circRNA | 0.711373054 | 0.014178345 |
| hsa_circ_0073993 | circRNA | 0.711304079 | 0.002409843 |
| COPB2            | mRNA    | 0.711166255 | 2.02E-06    |
| SRM              | mRNA    | 0.711001549 | 0.001748114 |
| FAM156B          | mRNA    | 0.710845749 | 5.50E-09    |
| hsa_circ_0007083 | circRNA | 0.708611649 | 3.21E-07    |
| CDR2             | mRNA    | 0.708515804 | 1.51E-04    |
| hsa_circ_0042824 | circRNA | 0.708182014 | 0.023484368 |
| hsa_circ_0003728 | circRNA | 0.708021904 | 0.006046503 |
| TTLL12           | mRNA    | 0.70739086  | 0.048929647 |
| CEP83            | mRNA    | 0.70676107  | 0.003218308 |
| CEBPG            | mRNA    | 0.706243764 | 2.45E-05    |
| hsa_circ_0115597 | circRNA | 0.705788098 | 0.012815721 |
| hsa_circ_0077830 | circRNA | 0.705590357 | 0.00327116  |
| hsa_circ_0025431 | circRNA | 0.705145503 | 9.15E-04    |
| hsa_circ_0084753 | circRNA | 0.705035044 | 0.004677111 |
| hsa_circ_0122203 | circRNA | 0.705034318 | 2.34E-04    |
| hsa_circ_0029325 | circRNA | 0.704636826 | 1.46E-04    |
| C17orf51         | lncRNA  | 0.704524851 | 0.004927829 |
| SLFN13           | mRNA    | 0.703945689 | 5.29E-05    |
| hsa_circ_0105625 | circRNA | 0.703908918 | 0.001595656 |
| hsa_circ_0079565 | circRNA | 0.703680996 | 0.02498847  |
| UBE2J1           | mRNA    | 0.703617312 | 0.010463489 |
| hsa_circ_0030564 | circRNA | 0.703476363 | 0.003305303 |

|                  |         |             |             |
|------------------|---------|-------------|-------------|
| hsa_circ_0007626 | circRNA | 0.702954548 | 0.014078056 |
| hsa_circ_0067253 | circRNA | 0.702826743 | 1.10E-05    |
| hsa_circ_0062876 | circRNA | 0.702299218 | 0.013063634 |
| PDXK             | mRNA    | 0.702203295 | 1.24E-05    |
| hsa_circ_0098688 | circRNA | 0.701901393 | 0.012000727 |
| RSPH3            | mRNA    | 0.701652096 | 2.07E-04    |
| PDGFA            | mRNA    | 0.700346088 | 0.036794906 |
| hsa_circ_0094626 | circRNA | 0.700189361 | 0.015693019 |
| PCDH1            | mRNA    | 0.699912109 | 0.0434775   |
| LOC102724143     | lncRNA  | 0.699831476 | 0.028089513 |
| hsa_circ_0104004 | circRNA | 0.69926979  | 0.049879218 |
| hsa_circ_0110665 | circRNA | 0.699194004 | 0.0381414   |
| hsa_circ_0041267 | circRNA | 0.699029554 | 0.014209689 |
| hsa_circ_0070234 | circRNA | 0.698886876 | 2.63E-09    |
| hsa_circ_0029341 | circRNA | 0.698292317 | 0.005901017 |
| hsa_circ_0023883 | circRNA | 0.697807125 | 0.004475924 |
| hsa_circ_0004271 | circRNA | 0.697535237 | 4.82E-05    |
| hsa_circ_0013693 | circRNA | 0.697256196 | 0.03425846  |
| hsa_circ_0059422 | circRNA | 0.697210493 | 0.001610825 |
| TP53INP2         | mRNA    | 0.696931158 | 6.70E-07    |
| GOSR2            | mRNA    | 0.69685199  | 1.98E-06    |
| GOLGA5           | mRNA    | 0.696821906 | 3.57E-08    |
| hsa_circ_0133562 | circRNA | 0.696814108 | 0.007661012 |
| KLF10            | mRNA    | 0.696481279 | 6.74E-04    |
| POLD2            | mRNA    | 0.696177904 | 0.001535968 |

|                  |         |             |             |
|------------------|---------|-------------|-------------|
| hsa_circ_0031732 | circRNA | 0.696158455 | 9.59E-04    |
| hsa_circ_0070247 | circRNA | 0.696055791 | 0.021696929 |
| hsa_circ_0120356 | circRNA | 0.695359936 | 5.09E-06    |
| DPYSL2           | mRNA    | 0.695213626 | 8.94E-05    |
| hsa_circ_0064279 | circRNA | 0.694720437 | 4.43E-05    |
| FAM126A          | mRNA    | 0.69397339  | 0.016872385 |
| PRDX5            | mRNA    | 0.693572866 | 3.79E-06    |
| APOL2            | mRNA    | 0.693152583 | 9.11E-05    |
| CACNB1           | mRNA    | 0.693077792 | 0.024209897 |
| KIFC3            | mRNA    | 0.692465683 | 0.002079846 |
| hsa_circ_0125712 | circRNA | 0.69229276  | 0.022144694 |
| hsa_circ_0094398 | circRNA | 0.691818624 | 0.034537877 |
| hsa_circ_0124321 | circRNA | 0.691759875 | 0.044374932 |
| SLC7A1           | mRNA    | 0.691164617 | 2.99E-04    |
| HCLS1            | mRNA    | 0.690454731 | 0.017023595 |
| hsa_circ_0136214 | circRNA | 0.690147483 | 2.13E-04    |
| hsa_circ_0082149 | circRNA | 0.689954345 | 0.021204366 |
| SEC31A           | mRNA    | 0.689893773 | 1.02E-14    |
| KALRN            | mRNA    | 0.68975419  | 2.47E-06    |
| hsa_circ_0024580 | circRNA | 0.689731909 | 1.40E-04    |
| hsa_circ_0012121 | circRNA | 0.689677724 | 0.015191114 |
| hsa_circ_0092069 | circRNA | 0.689404102 | 0.010216553 |
| hsa_circ_0061892 | circRNA | 0.68940063  | 0.007375184 |
| hsa_circ_0120361 | circRNA | 0.688979414 | 2.85E-04    |
| SLC39A7          | mRNA    | 0.688132937 | 4.71E-05    |

|                  |         |             |             |
|------------------|---------|-------------|-------------|
| hsa_circ_0008530 | circRNA | 0.688128276 | 0.002670996 |
| hsa_circ_0068992 | circRNA | 0.688062402 | 1.29E-04    |
| RAPGEF5          | mRNA    | 0.68766243  | 0.018127224 |
| hsa_circ_0036200 | circRNA | 0.687353037 | 3.27E-04    |
| DNM3             | mRNA    | 0.687100797 | 0.018137633 |
| TICAM1           | mRNA    | 0.686323683 | 3.22E-04    |
| SH3RF3-AS1       | lncRNA  | 0.686090966 | 2.24E-04    |
| hsa_circ_0058382 | circRNA | 0.685614165 | 0.005460628 |
| CD59             | mRNA    | 0.68558289  | 8.90E-06    |
| GK5              | mRNA    | 0.685401599 | 1.88E-05    |
| hsa_circ_0074892 | circRNA | 0.684680725 | 0.002999265 |
| LOC101929204     | lncRNA  | 0.684085482 | 0.020380113 |
| hsa_circ_0096173 | circRNA | 0.683738573 | 0.005646299 |
| hsa_circ_0026128 | circRNA | 0.683535566 | 0.00430618  |
| hsa_circ_0027902 | circRNA | 0.683064946 | 0.039723101 |
| hsa_circ_0019036 | circRNA | 0.683003052 | 7.42E-05    |
| PRAF2            | mRNA    | 0.681752604 | 1.22E-07    |
| hsa_circ_0099900 | circRNA | 0.681546287 | 0.007780652 |
| hsa_circ_0067420 | circRNA | 0.681359319 | 0.001468434 |
| hsa_circ_0005855 | circRNA | 0.680764915 | 0.021441401 |
| hsa_circ_0060831 | circRNA | 0.680513356 | 0.006056351 |
| HEATR5A          | mRNA    | 0.679942385 | 2.55E-09    |
| hsa_circ_0076003 | circRNA | 0.679912659 | 0.045327291 |
| PCDHGA10         | mRNA    | 0.679440698 | 0.010736496 |
| hsa_circ_0008661 | circRNA | 0.679393714 | 9.74E-06    |

|                  |         |             |             |
|------------------|---------|-------------|-------------|
| hsa_circ_0061078 | circRNA | 0.679345891 | 0.038709216 |
| C12orf57         | mRNA    | 0.678851276 | 8.46E-04    |
| CDC42EP3         | mRNA    | 0.678666414 | 2.58E-05    |
| DESI1            | mRNA    | 0.678492323 | 0.003555826 |
| DNHD1            | mRNA    | 0.678291796 | 0.010779166 |
| NUAK2            | mRNA    | 0.678010767 | 0.026875619 |
| LOC112268301     | lncRNA  | 0.677700103 | 2.83E-04    |
| LOC105369332     | lncRNA  | 0.67740309  | 9.29E-04    |
| hsa_circ_0116681 | circRNA | 0.677037444 | 3.26E-04    |
| hsa_circ_0039537 | circRNA | 0.676880932 | 0.005068808 |
| hsa_circ_0132630 | circRNA | 0.675704935 | 0.010894072 |
| hsa_circ_0074002 | circRNA | 0.675667916 | 0.02788788  |
| ZBTB21           | mRNA    | 0.675241737 | 2.45E-06    |
| hsa_circ_0060012 | circRNA | 0.675183957 | 0.011755614 |
| hsa_circ_0120815 | circRNA | 0.675154784 | 7.19E-04    |
| PHYHIP           | mRNA    | 0.674697516 | 0.006728445 |
| hsa_circ_0004596 | circRNA | 0.674448676 | 4.32E-05    |
| ETS2             | mRNA    | 0.673487817 | 0.004289343 |
| NAMPT            | mRNA    | 0.673388163 | 1.48E-04    |
| TVP23B           | mRNA    | 0.673178002 | 9.20E-05    |
| hsa_circ_0107680 | circRNA | 0.672604675 | 0.033110565 |
| LOC101926956     | lncRNA  | 0.672575479 | 0.024904859 |
| RTL8C            | mRNA    | 0.672522281 | 1.63E-08    |
| hsa_circ_0005742 | circRNA | 0.672148337 | 0.001485756 |
| hsa_circ_0054585 | circRNA | 0.671006206 | 2.02E-04    |

|                  |         |             |             |
|------------------|---------|-------------|-------------|
| hsa_circ_0127093 | circRNA | 0.670955085 | 1.97E-07    |
| BGIG9606_41928   | lncRNA  | 0.670838922 | 4.50E-04    |
| hsa_circ_0079079 | circRNA | 0.670739661 | 1.55E-04    |
| LINC00921        | lncRNA  | 0.670689033 | 0.007755051 |
| LGALSL           | mRNA    | 0.670562272 | 3.53E-05    |
| TALDO1           | mRNA    | 0.670213994 | 0.012953158 |
| hsa_circ_0006670 | circRNA | 0.670040111 | 0.04477533  |
| UCP2             | mRNA    | 0.67000714  | 0.032596625 |
| hsa_circ_0096185 | circRNA | 0.66974665  | 0.019237932 |
| GMPPA            | mRNA    | 0.6696336   | 1.37E-05    |
| hsa_circ_0024583 | circRNA | 0.668843055 | 0.013040988 |
| HABP4            | mRNA    | 0.668786696 | 0.003572503 |
| CD276            | mRNA    | 0.667829178 | 0.012806579 |
| LOC107985200     | lncRNA  | 0.667747795 | 0.022147036 |
| TAF4B            | mRNA    | 0.667466936 | 9.68E-04    |
| CETN2            | mRNA    | 0.66740429  | 6.48E-07    |
| ZBTB42           | mRNA    | 0.667353222 | 4.00E-08    |
| hsa_circ_0134442 | circRNA | 0.66726341  | 0.001443135 |
| hsa_circ_0135681 | circRNA | 0.667092218 | 0.014078056 |
| hsa_circ_0000954 | circRNA | 0.667071647 | 0.002392036 |
| hsa_circ_0002703 | circRNA | 0.666311159 | 0.014990324 |
| FNTB             | mRNA    | 0.666094435 | 0.006444562 |
| IL15RA           | mRNA    | 0.666045723 | 6.65E-05    |
| hsa_circ_0081341 | circRNA | 0.66598735  | 0.008949684 |
| hsa_circ_0024581 | circRNA | 0.665361665 | 9.37E-04    |



|                  |         |             |             |
|------------------|---------|-------------|-------------|
| GUK1             | mRNA    | 0.665146264 | 1.00E-10    |
| KRT10            | mRNA    | 0.665123605 | 1.55E-04    |
| LIMK2            | mRNA    | 0.664148866 | 5.68E-04    |
| hsa_circ_0001329 | circRNA | 0.664132198 | 0.010646152 |
| JAG2             | mRNA    | 0.663941927 | 0.006468765 |
| hsa_circ_0093013 | circRNA | 0.66387535  | 0.007422306 |
| SLC30A5          | mRNA    | 0.663147311 | 5.59E-04    |
| MYO7A            | mRNA    | 0.662982638 | 0.018136338 |
| hsa_circ_0004716 | circRNA | 0.662914306 | 0.001716749 |
| hsa_circ_0101727 | circRNA | 0.662392989 | 0.010116461 |
| hsa_circ_0129530 | circRNA | 0.661993211 | 0.009449907 |
| MARVELD1         | mRNA    | 0.661500948 | 6.18E-10    |
| RABEPK           | mRNA    | 0.661421551 | 0.001489154 |
| hsa_circ_0058273 | circRNA | 0.660092349 | 0.018293194 |
| hsa_circ_0054561 | circRNA | 0.660011458 | 0.001047711 |
| PGP              | mRNA    | 0.659747929 | 0.018673611 |
| hsa_circ_0088768 | circRNA | 0.659462285 | 0.003647447 |
| FXD5             | mRNA    | 0.659275703 | 5.68E-04    |
| hsa_circ_0067592 | circRNA | 0.658743447 | 0.039689246 |
| hsa_circ_0053115 | circRNA | 0.658684778 | 2.77E-05    |
| BGIG9606_45075   | lncRNA  | 0.657914885 | 0.020329353 |
| SPTSSA           | mRNA    | 0.65759711  | 6.72E-06    |
| ZNF526           | mRNA    | 0.657447111 | 5.13E-04    |
| hsa_circ_0088701 | circRNA | 0.657383697 | 0.037202055 |
| ZFP69B           | mRNA    | 0.657154186 | 0.03470128  |

|                  |         |             |             |
|------------------|---------|-------------|-------------|
| LOC112268225     | lncRNA  | 0.657051692 | 0.001089624 |
| GNAI2            | mRNA    | 0.656937284 | 3.23E-07    |
| QPCTL            | mRNA    | 0.656849706 | 6.68E-04    |
| SLC35C1          | mRNA    | 0.656687049 | 1.15E-04    |
| CREB3            | mRNA    | 0.656520934 | 6.54E-07    |
| hsa_circ_0120359 | circRNA | 0.656426365 | 1.74E-06    |
| SUN1             | mRNA    | 0.655666407 | 1.91E-07    |
| hsa_circ_0029354 | circRNA | 0.655185029 | 1.41E-06    |
| C16orf45         | mRNA    | 0.655070271 | 0.004616766 |
| hsa_circ_0009749 | circRNA | 0.654889857 | 0.023326068 |
| SH3BGRL3         | mRNA    | 0.654225684 | 1.73E-05    |
| hsa_circ_0025728 | circRNA | 0.654125661 | 0.029627365 |
| hsa_circ_0079082 | circRNA | 0.653794366 | 4.64E-04    |
| HRAT92           | lncRNA  | 0.653740142 | 0.023295447 |
| ACSL4            | mRNA    | 0.653644095 | 0.001931596 |
| hsa_circ_0055054 | circRNA | 0.653405568 | 0.01331942  |
| XBP1             | mRNA    | 0.653275785 | 5.09E-04    |
| COTL1            | mRNA    | 0.653228864 | 3.97E-04    |
| hsa_circ_0001850 | circRNA | 0.653131424 | 0.006410468 |
| DNAJA4           | mRNA    | 0.652839082 | 0.02047637  |
| PTPRM            | mRNA    | 0.652710653 | 0.0014594   |
| hsa_circ_0062885 | circRNA | 0.652191778 | 0.039808867 |
| hsa_circ_0036775 | circRNA | 0.652072892 | 0.002851506 |
| GORASP2          | mRNA    | 0.651912446 | 2.14E-06    |
| FLOT1            | mRNA    | 0.65119007  | 0.006242485 |

|                  |         |             |             |
|------------------|---------|-------------|-------------|
| SLC43A2          | mRNA    | 0.651164469 | 7.21E-05    |
| hsa_circ_0053116 | circRNA | 0.651104148 | 6.87E-05    |
| hsa_circ_0132629 | circRNA | 0.650699008 | 0.001491688 |
| hsa_circ_0077467 | circRNA | 0.650693339 | 0.033076375 |
| ZDHHC18          | mRNA    | 0.65012686  | 1.45E-05    |
| hsa_circ_0018635 | circRNA | 0.649641025 | 5.25E-04    |
| hsa_circ_0003319 | circRNA | 0.649633214 | 0.001990179 |
| IER2             | mRNA    | 0.649488243 | 0.001478237 |
| hsa_circ_0023338 | circRNA | 0.64926857  | 0.027441597 |
| MRPL17           | mRNA    | 0.648977805 | 8.53E-06    |
| hsa_circ_0021621 | circRNA | 0.648969282 | 7.50E-06    |
| hsa_circ_0014866 | circRNA | 0.648894503 | 0.015789389 |
| CLIC1            | mRNA    | 0.648007732 | 0.003919603 |
| hsa_circ_0067872 | circRNA | 0.647828309 | 0.017388354 |
| DAAM1            | mRNA    | 0.647693442 | 8.61E-04    |
| hsa_circ_0019697 | circRNA | 0.647584226 | 0.0125096   |
| hsa_circ_0042807 | circRNA | 0.64723343  | 0.018508192 |
| YIPF2            | mRNA    | 0.647111618 | 3.82E-06    |
| hsa_circ_0007432 | circRNA | 0.646791465 | 0.046387573 |
| UBC              | mRNA    | 0.646700549 | 1.02E-05    |
| hsa_circ_0120352 | circRNA | 0.646459602 | 4.78E-06    |
| SAR1A            | mRNA    | 0.645789549 | 2.18E-05    |
| hsa_circ_0101402 | circRNA | 0.64527129  | 0.002324543 |
| hsa_circ_0091322 | circRNA | 0.645241304 | 0.001893902 |
| hsa_circ_0127076 | circRNA | 0.644595709 | 2.06E-05    |

|                  |         |             |             |
|------------------|---------|-------------|-------------|
| GPAT4            | mRNA    | 0.644555833 | 7.84E-04    |
| hsa_circ_0108936 | circRNA | 0.644413529 | 0.010116461 |
| LAMA5            | mRNA    | 0.644309192 | 0.002375111 |
| TMF1             | mRNA    | 0.643813398 | 5.05E-09    |
| hsa_circ_0061092 | circRNA | 0.643644272 | 0.04628003  |
| hsa_circ_0009140 | circRNA | 0.643564394 | 0.028187112 |
| hsa_circ_0125389 | circRNA | 0.643138667 | 5.87E-04    |
| WDR45            | mRNA    | 0.642854763 | 4.71E-04    |
| SLC31A1          | mRNA    | 0.642766272 | 1.47E-04    |
| RAP2B            | mRNA    | 0.642547025 | 0.009638733 |
| hsa_circ_0105245 | circRNA | 0.642499028 | 8.56E-06    |
| hsa_circ_0028950 | circRNA | 0.642352181 | 0.002554266 |
| hsa_circ_0023884 | circRNA | 0.642304515 | 0.005130608 |
| MSN              | mRNA    | 0.641321529 | 2.34E-05    |
| hsa_circ_0019422 | circRNA | 0.641316424 | 0.005187928 |
| hsa_circ_0005504 | circRNA | 0.641181338 | 0.002251709 |
| hsa_circ_0109024 | circRNA | 0.641115037 | 0.025915174 |
| hsa_circ_0111071 | circRNA | 0.640968077 | 0.001737925 |
| hsa_circ_0016770 | circRNA | 0.640765886 | 1.65E-06    |
| SEPT6            | mRNA    | 0.639958304 | 0.003688177 |
| hsa_circ_0003307 | circRNA | 0.639903542 | 0.006009065 |
| hsa_circ_0014208 | circRNA | 0.639871802 | 0.003413311 |
| DHDDS            | mRNA    | 0.639756535 | 3.36E-06    |
| PLEKHA1          | mRNA    | 0.63927415  | 0.004774499 |
| hsa_circ_0028949 | circRNA | 0.63927227  | 0.006830087 |

|                  |         |             |             |
|------------------|---------|-------------|-------------|
| MSTO1            | mRNA    | 0.639155034 | 1.79E-04    |
| hsa_circ_0004470 | circRNA | 0.638935677 | 0.028255625 |
| TMEM167A         | mRNA    | 0.638445184 | 9.88E-05    |
| hsa_circ_0104878 | circRNA | 0.63839358  | 0.004339815 |
| CMTM3            | mRNA    | 0.638337353 | 0.021873758 |
| BGIG9606_54989   | mRNA    | 0.638313302 | 1.61E-04    |
| hsa_circ_0000653 | circRNA | 0.638090399 | 9.51E-04    |
| hsa_circ_0014910 | circRNA | 0.638089576 | 0.044451627 |
| hsa_circ_0031729 | circRNA | 0.637736358 | 0.00668815  |
| SLC7A6           | mRNA    | 0.637151074 | 9.44E-08    |
| NACAD            | mRNA    | 0.636746179 | 0.011114668 |
| hsa_circ_0084613 | circRNA | 0.634570432 | 0.020003806 |
| hsa_circ_0038054 | circRNA | 0.634360238 | 0.030505626 |
| hsa_circ_0067275 | circRNA | 0.634203098 | 7.76E-05    |
| hsa_circ_0079080 | circRNA | 0.633605379 | 0.005217455 |
| HID1             | mRNA    | 0.633528184 | 7.81E-10    |
| hsa_circ_0070253 | circRNA | 0.633338147 | 0.007674614 |
| hsa_circ_0025046 | circRNA | 0.633244357 | 0.022876334 |
| hsa_circ_0074661 | circRNA | 0.633065181 | 3.64E-04    |
| ZBED8            | mRNA    | 0.632955238 | 4.39E-04    |
| AEN              | mRNA    | 0.632940859 | 0.009358401 |
| TBC1D9           | mRNA    | 0.632188746 | 0.006569125 |
| hsa_circ_0020696 | circRNA | 0.632119047 | 0.005787    |
| GLRX             | mRNA    | 0.631735344 | 0.006905957 |
| hsa_circ_0003549 | circRNA | 0.631362066 | 8.23E-06    |

|                  |         |             |             |
|------------------|---------|-------------|-------------|
| hsa_circ_0058391 | circRNA | 0.631195479 | 0.017959634 |
| SSH2             | mRNA    | 0.630921397 | 0.010512338 |
| hsa_circ_0042820 | circRNA | 0.63089659  | 0.010885303 |
| MOSMO            | mRNA    | 0.630769236 | 0.006998568 |
| OGFOD1           | mRNA    | 0.630718425 | 7.29E-04    |
| SRD5A3           | mRNA    | 0.630475363 | 1.06E-04    |
| hsa_circ_0046816 | circRNA | 0.630245545 | 0.026546082 |
| hsa_circ_0111658 | circRNA | 0.630208663 | 7.82E-04    |
| hsa_circ_0108932 | circRNA | 0.629960245 | 0.00668815  |
| hsa_circ_0106447 | circRNA | 0.629626491 | 0.003064532 |
| MAGED1           | mRNA    | 0.62951227  | 0.001782116 |
| hsa_circ_0127088 | circRNA | 0.629317311 | 8.02E-04    |
| hsa_circ_0047776 | circRNA | 0.629136328 | 0.003279744 |
| SLC10A3          | mRNA    | 0.629100273 | 1.55E-07    |
| ATAD3A           | mRNA    | 0.628981221 | 0.004964272 |
| hsa_circ_0126963 | circRNA | 0.628312991 | 0.047636836 |
| hsa_circ_0033548 | circRNA | 0.628226391 | 0.025614217 |
| SCARF2           | mRNA    | 0.628155154 | 0.001398948 |
| NPHP4            | mRNA    | 0.628101232 | 0.001520035 |
| hsa_circ_0054978 | circRNA | 0.627677786 | 6.74E-06    |
| hsa_circ_0079065 | circRNA | 0.627501769 | 0.001974056 |
| MAGEH1           | mRNA    | 0.627454796 | 4.74E-06    |
| hsa_circ_0042799 | circRNA | 0.627001018 | 0.048669619 |
| hsa_circ_0003107 | circRNA | 0.626990745 | 5.47E-04    |
| PWWP2B           | mRNA    | 0.62663709  | 0.009399885 |

|                           |         |             |             |
|---------------------------|---------|-------------|-------------|
| hsa_circ_0129528          | circRNA | 0.62606783  | 0.044107877 |
| hsa_circ_0106506          | circRNA | 0.625977369 | 0.026881972 |
| hsa_circ_0042810          | circRNA | 0.625949374 | 0.001487875 |
| hsa_circ_0129531          | circRNA | 0.625543451 | 0.037202055 |
| hsa_circ_0008955          | circRNA | 0.625540936 | 0.005281932 |
| hsa_circ_0079064          | circRNA | 0.625493436 | 0.001528119 |
| hsa_circ_0077207          | circRNA | 0.625454666 | 0.01148743  |
| hsa_circ_0110427          | circRNA | 0.625410198 | 0.02735311  |
| hsa_circ_0067705          | circRNA | 0.625332544 | 0.039895567 |
| CHPF2                     | mRNA    | 0.625252355 | 1.34E-04    |
| ARHGAP27P1-BPTFP1-KPNA2P3 | pseudo  | 0.625226212 | 3.61E-05    |
| hsa_circ_0065847          | circRNA | 0.625089889 | 1.22E-06    |
| BGIG9606_42210            | lncRNA  | 0.624910848 | 0.012256154 |
| POMT2                     | mRNA    | 0.624544908 | 0.00204087  |
| SPTBN1                    | mRNA    | 0.624438039 | 3.30E-05    |
| hsa_circ_0009497          | circRNA | 0.624418739 | 0.008664153 |
| hsa_circ_0019421          | circRNA | 0.624373503 | 0.040186187 |
| hsa_circ_0004261          | circRNA | 0.623983788 | 0.016628322 |
| hsa_circ_0115395          | circRNA | 0.62308608  | 0.012483156 |
| hsa_circ_0004618          | circRNA | 0.622679622 | 0.016021655 |
| AHRR                      | mRNA    | 0.622676376 | 0.039409006 |
| hsa_circ_0000753          | circRNA | 0.622625203 | 0.021272295 |
| hsa_circ_0014888          | circRNA | 0.622540208 | 0.027619437 |
| hsa_circ_0101724          | circRNA | 0.622447014 | 0.002795016 |
| hsa_circ_0026130          | circRNA | 0.622214461 | 0.021138906 |

|                  |         |             |             |
|------------------|---------|-------------|-------------|
| EHBP1L1          | mRNA    | 0.622009005 | 0.036477952 |
| CORO7            | mRNA    | 0.621852581 | 0.004514569 |
| hsa_circ_0045937 | circRNA | 0.621850433 | 0.045245238 |
| hsa_circ_0003121 | circRNA | 0.621693207 | 0.005390466 |
| PPFIBP1          | mRNA    | 0.620983731 | 2.33E-08    |
| hsa_circ_0096402 | circRNA | 0.620935794 | 0.002497738 |
| OAT              | mRNA    | 0.620915652 | 9.21E-06    |
| CIB1             | mRNA    | 0.620422711 | 3.48E-07    |
| DGKA             | mRNA    | 0.620289825 | 3.85E-04    |
| LRFN4            | mRNA    | 0.619964031 | 1.23E-04    |
| SYNC             | mRNA    | 0.61987892  | 0.002055753 |
| SPAG5-AS1        | lncRNA  | 0.619479269 | 0.01706378  |
| hsa_circ_0007451 | circRNA | 0.619290864 | 0.004138322 |
| LIPA             | mRNA    | 0.619203497 | 3.06E-14    |
| hsa_circ_0136221 | circRNA | 0.618772707 | 0.00263322  |
| hsa_circ_0136213 | circRNA | 0.618618186 | 0.006460929 |
| hsa_circ_0128010 | circRNA | 0.617966572 | 0.00357183  |
| hsa_circ_0057332 | circRNA | 0.617833089 | 0.001141912 |
| SEC23A           | mRNA    | 0.617780645 | 2.48E-05    |
| hsa_circ_0053118 | circRNA | 0.617451315 | 0.005210999 |
| TMEM140          | mRNA    | 0.617244064 | 0.02985415  |
| hsa_circ_0000339 | circRNA | 0.617191476 | 0.003842903 |
| DNAJC10          | mRNA    | 0.617082348 | 2.85E-06    |
| CCND3            | mRNA    | 0.6169679   | 9.68E-05    |
| LY6E             | mRNA    | 0.616852857 | 0.006117644 |



|                  |         |             |             |
|------------------|---------|-------------|-------------|
| TBL2             | mRNA    | 0.616590999 | 2.39E-05    |
| hsa_circ_0018634 | circRNA | 0.616554416 | 1.62E-04    |
| STX2             | mRNA    | 0.616512235 | 7.20E-10    |
| AGAP2-AS1        | lncRNA  | 0.616286986 | 0.009974154 |
| hsa_circ_0067274 | circRNA | 0.616002961 | 3.70E-04    |
| BET1L            | mRNA    | 0.615691501 | 3.19E-05    |
| RAB6A            | mRNA    | 0.614364359 | 2.27E-13    |
| LINC01128        | lncRNA  | 0.614324719 | 0.006348892 |
| hsa_circ_0039448 | circRNA | 0.614072519 | 0.025081735 |
| ESYT2            | mRNA    | 0.613757369 | 1.90E-05    |
| CD46             | mRNA    | 0.613741529 | 1.85E-07    |
| hsa_circ_0011992 | circRNA | 0.613639874 | 0.007129887 |
| EML6             | mRNA    | 0.613420243 | 4.22E-04    |
| FIGNL2           | mRNA    | 0.612800557 | 0.006469895 |
| P2RY2            | mRNA    | 0.612781237 | 0.042925898 |
| hsa_circ_0107722 | circRNA | 0.612742027 | 0.041555069 |
| hsa_circ_0140372 | circRNA | 0.612365584 | 0.001777335 |
| ZNF598           | mRNA    | 0.61196137  | 0.005716891 |
| MORF4L2          | mRNA    | 0.611960614 | 1.79E-04    |
| hsa_circ_0006894 | circRNA | 0.611607879 | 0.009741082 |
| hsa_circ_0014901 | circRNA | 0.611236171 | 0.002139247 |
| RUSC1-AS1        | lncRNA  | 0.611089763 | 0.002499666 |
| hsa_circ_0120779 | circRNA | 0.610900991 | 6.57E-06    |
| DPH2             | mRNA    | 0.610321623 | 0.004842361 |
| hsa_circ_0023508 | circRNA | 0.610169251 | 0.008625659 |

|                  |         |             |             |
|------------------|---------|-------------|-------------|
| IMPDH1           | mRNA    | 0.610011993 | 5.74E-04    |
| hsa_circ_0004088 | circRNA | 0.608978928 | 0.019893757 |
| NAGA             | mRNA    | 0.608799991 | 2.18E-04    |
| hsa_circ_0098197 | circRNA | 0.608782781 | 0.02849211  |
| PCBD2            | mRNA    | 0.608649162 | 8.66E-04    |
| MANF             | mRNA    | 0.608631359 | 0.011486176 |
| hsa_circ_0129526 | circRNA | 0.60792081  | 0.008430997 |
| UFM1             | mRNA    | 0.607660455 | 5.90E-04    |
| hsa_circ_0083196 | circRNA | 0.607204142 | 0.022250974 |
| INF2             | mRNA    | 0.607185802 | 5.82E-04    |
| hsa_circ_0069368 | circRNA | 0.607123568 | 0.00392823  |
| RASSF1           | mRNA    | 0.606630268 | 1.69E-05    |
| CAMKK2           | mRNA    | 0.606433789 | 0.0011395   |
| YKT6             | mRNA    | 0.606281912 | 0.001968986 |
| hsa_circ_0011207 | circRNA | 0.604826618 | 0.030999246 |
| hsa_circ_0088129 | circRNA | 0.604701364 | 0.032019588 |
| hsa_circ_0022689 | circRNA | 0.604205883 | 0.006344075 |
| hsa_circ_0001225 | circRNA | 0.604025975 | 0.002914893 |
| REEP3            | mRNA    | 0.603714205 | 0.023068772 |
| GLUD1            | mRNA    | 0.603705367 | 6.34E-07    |
| hsa_circ_0070997 | circRNA | 0.603542838 | 0.001022424 |
| hsa_circ_0061089 | circRNA | 0.603453725 | 0.023183805 |
| hsa_circ_0090886 | circRNA | 0.603386777 | 7.24E-05    |
| IL4R             | mRNA    | 0.603356353 | 1.77E-12    |
| hsa_circ_0039445 | circRNA | 0.603056151 | 0.015102124 |

|                  |         |             |             |
|------------------|---------|-------------|-------------|
| hsa_circ_0097078 | circRNA | 0.602693744 | 0.021113208 |
| hsa_circ_0080218 | circRNA | 0.602637477 | 0.007660044 |
| hsa_circ_0088767 | circRNA | 0.602632108 | 0.02431567  |
| hsa_circ_0023503 | circRNA | 0.602332032 | 1.18E-04    |
| P3H4             | mRNA    | 0.602303664 | 0.001753985 |
| LINC00888        | lncRNA  | 0.601543121 | 0.022509946 |
| APAF1            | mRNA    | 0.601396731 | 2.66E-06    |
| ZEB1             | mRNA    | 0.601301674 | 0.018431547 |
| hsa_circ_0134373 | circRNA | 0.601299536 | 0.010318986 |
| SEC61G           | mRNA    | 0.601278082 | 0.002625743 |
| CEBPB            | mRNA    | 0.601138509 | 0.001377555 |
| CFLAR            | mRNA    | 0.599857891 | 2.28E-06    |
| SIAH2            | mRNA    | 0.599753605 | 6.59E-04    |
| LYSMD4           | mRNA    | 0.599543685 | 8.95E-04    |
| hsa_circ_0036197 | circRNA | 0.599334009 | 0.003662344 |
| hsa_circ_0057015 | circRNA | 0.599263397 | 0.030891206 |
| ATG101           | mRNA    | 0.599185363 | 1.91E-07    |
| TULP3            | mRNA    | 0.599041405 | 5.49E-08    |
| PKM              | mRNA    | 0.598987377 | 0.013126816 |
| DUSP7            | mRNA    | 0.598752891 | 2.10E-05    |
| BGIG9606_54350   | mRNA    | 0.59860325  | 0.047571523 |
| LAPTM5           | mRNA    | 0.598531766 | 0.04836633  |
| MCM3AP-AS1       | lncRNA  | 0.598031845 | 0.030372292 |
| TMEM120B         | mRNA    | 0.597970076 | 0.001993163 |
| hsa_circ_0004106 | circRNA | 0.597719961 | 0.006171983 |

|                  |         |             |             |
|------------------|---------|-------------|-------------|
| hsa_circ_0001776 | circRNA | 0.597196891 | 0.004241963 |
| ORAI2            | mRNA    | 0.597050511 | 2.03E-06    |
| hsa_circ_0022828 | circRNA | 0.596863053 | 0.021711922 |
| RECQL            | mRNA    | 0.596651822 | 1.05E-09    |
| hsa_circ_0098604 | circRNA | 0.596234231 | 0.01204008  |
| hsa_circ_0106504 | circRNA | 0.595965695 | 0.046401286 |
| SLC36A4          | mRNA    | 0.595847257 | 0.001149992 |
| RNF141           | mRNA    | 0.595627172 | 0.028959411 |
| SLC2A10          | mRNA    | 0.595135548 | 0.019808035 |
| hsa_circ_0087225 | circRNA | 0.594821913 | 0.003315745 |
| hsa_circ_0075045 | circRNA | 0.594318263 | 0.004495211 |
| TCTA             | mRNA    | 0.594294247 | 1.59E-13    |
| KIAA1522         | mRNA    | 0.594030649 | 0.006272016 |
| hsa_circ_0022582 | circRNA | 0.59383301  | 0.013747319 |
| hsa_circ_0029349 | circRNA | 0.593657889 | 2.94E-05    |
| hsa_circ_0025438 | circRNA | 0.593063849 | 0.011882044 |
| hsa_circ_0018803 | circRNA | 0.592874386 | 0.027619437 |
| ZDHHC1           | mRNA    | 0.592651522 | 0.008500912 |
| hsa_circ_0128551 | circRNA | 0.592596381 | 0.017556376 |
| hsa_circ_0063634 | circRNA | 0.592365751 | 0.016453947 |
| CSTB             | mRNA    | 0.592285222 | 8.05E-08    |
| hsa_circ_0031712 | circRNA | 0.592132145 | 0.001404631 |
| hsa_circ_0004426 | circRNA | 0.591735811 | 0.011725572 |
| hsa_circ_0047780 | circRNA | 0.591576787 | 0.005281932 |
| hsa_circ_0127086 | circRNA | 0.590926972 | 0.002313442 |

|                  |         |             |             |
|------------------|---------|-------------|-------------|
| hsa_circ_0079278 | circRNA | 0.590784908 | 0.038260925 |
| hsa_circ_0000458 | circRNA | 0.590612591 | 8.58E-04    |
| hsa_circ_0116684 | circRNA | 0.590411383 | 0.003108846 |
| CDK2AP2          | mRNA    | 0.59013011  | 0.008125436 |
| hsa_circ_0074658 | circRNA | 0.590114343 | 0.002486727 |
| hsa_circ_0042946 | circRNA | 0.589872254 | 0.035551348 |
| TXNDC11          | mRNA    | 0.589671263 | 1.91E-05    |
| hsa_circ_0014924 | circRNA | 0.58898721  | 0.00218306  |
| CALCRL           | mRNA    | 0.58896041  | 0.008025879 |
| hsa_circ_0083205 | circRNA | 0.588913336 | 0.008289431 |
| hsa_circ_0002872 | circRNA | 0.588693465 | 0.039556116 |
| PDE4DIP          | mRNA    | 0.58850448  | 5.54E-04    |
| hsa_circ_0042843 | circRNA | 0.588456673 | 0.027619437 |
| hsa_circ_0009142 | circRNA | 0.588372547 | 0.027496654 |
| hsa_circ_0024766 | circRNA | 0.588259674 | 0.001439963 |
| DUSP1            | mRNA    | 0.588039064 | 2.61E-07    |
| NPR1             | mRNA    | 0.587087136 | 0.001062716 |
| RAP1B            | mRNA    | 0.587041896 | 9.71E-04    |
| GPR173           | mRNA    | 0.586562107 | 0.001014751 |
| MYBBP1A          | mRNA    | 0.586295792 | 0.006008657 |
| PLCB1            | mRNA    | 0.585567542 | 5.97E-11    |
| NDE1             | mRNA    | 0.58531604  | 4.28E-05    |
| hsa_circ_0026896 | circRNA | 0.585310411 | 0.007251928 |
| COQ10B           | mRNA    | 0.584792095 | 0.006171388 |
| SLC35E1          | mRNA    | 0.584535487 | 6.59E-06    |

|                  |         |             |             |
|------------------|---------|-------------|-------------|
| VSIG2            | mRNA    | 0.584322676 | 0.024431547 |
| SH3BP5-AS1       | lncRNA  | 0.584108559 | 0.001172143 |
| hsa_circ_0043683 | circRNA | 0.583610371 | 0.001828438 |
| hsa_circ_0120358 | circRNA | 0.583504327 | 0.02162586  |
| hsa_circ_0070836 | circRNA | 0.583400277 | 0.046980874 |
| hsa_circ_0091324 | circRNA | 0.583283969 | 0.045326933 |
| N6AMT1           | mRNA    | 0.583076043 | 0.005710589 |
| hsa_circ_0054979 | circRNA | 0.582675248 | 0.008984773 |
| CLCN6            | mRNA    | 0.582015179 | 1.91E-07    |
| hsa_circ_0092068 | circRNA | 0.582005899 | 0.011182134 |
| SH3BGRL2         | mRNA    | 0.581785216 | 0.001089624 |
| hsa_circ_0037869 | circRNA | 0.581682079 | 0.013928438 |
| hsa_circ_0009750 | circRNA | 0.581509419 | 0.009328307 |
| ARFGAP3          | mRNA    | 0.581255349 | 3.75E-11    |
| NLN              | mRNA    | 0.581056924 | 0.008171546 |
| ETV5             | mRNA    | 0.580905532 | 5.08E-04    |
| MYADM            | mRNA    | 0.580566833 | 7.21E-05    |
| SLC35C2          | mRNA    | 0.580019696 | 6.48E-10    |
| hsa_circ_0127094 | circRNA | 0.579969487 | 1.96E-04    |
| hsa_circ_0089921 | circRNA | 0.579798664 | 5.28E-04    |
| hsa_circ_0003927 | circRNA | 0.579581933 | 0.002808203 |
| LPCAT4           | mRNA    | 0.579475545 | 0.00225627  |
| ATP1B3           | mRNA    | 0.579239641 | 0.003067971 |
| ARHGAP1          | mRNA    | 0.579071833 | 9.83E-11    |
| hsa_circ_0058280 | circRNA | 0.578846915 | 0.012761167 |

|                  |         |             |             |
|------------------|---------|-------------|-------------|
| hsa_circ_0130911 | circRNA | 0.578694457 | 0.037905137 |
| TMSB10           | mRNA    | 0.578638368 | 1.95E-06    |
| hsa_circ_0024579 | circRNA | 0.578398898 | 0.049183851 |
| PLCB3            | mRNA    | 0.578377963 | 5.19E-05    |
| hsa_circ_0025625 | circRNA | 0.578039852 | 0.014359458 |
| SEC23IP          | mRNA    | 0.577876178 | 2.77E-04    |
| hsa_circ_0011985 | circRNA | 0.577601878 | 0.003910929 |
| hsa_circ_0139651 | circRNA | 0.577589739 | 0.013662901 |
| EMP1             | mRNA    | 0.577563862 | 0.006689655 |
| NOS3             | mRNA    | 0.577480284 | 0.023203493 |
| hsa_circ_0102937 | circRNA | 0.577267098 | 0.00295689  |
| hsa_circ_0080219 | circRNA | 0.576843067 | 0.002831258 |
| MSRB3            | mRNA    | 0.576262732 | 6.39E-06    |
| SLC26A1          | mRNA    | 0.57610372  | 0.011345931 |
| hsa_circ_0116546 | circRNA | 0.576101116 | 0.024995357 |
| SLC39A14         | mRNA    | 0.576088736 | 0.029369075 |
| hsa_circ_0127505 | circRNA | 0.576054957 | 2.60E-04    |
| TRAK2            | mRNA    | 0.575967342 | 0.00245839  |
| GNPNAT1          | mRNA    | 0.575923155 | 0.001043953 |
| FRMD8            | mRNA    | 0.575799284 | 2.32E-04    |
| TMEM263          | mRNA    | 0.574632878 | 4.95E-04    |
| YIF1B            | mRNA    | 0.574082087 | 0.008166806 |
| ARHGAP27P1       | pseudo  | 0.573373959 | 0.012739825 |
| TIMM10B          | mRNA    | 0.573277816 | 7.40E-06    |
| MED31            | mRNA    | 0.573222296 | 3.99E-04    |

|                  |         |             |             |
|------------------|---------|-------------|-------------|
| PHETA2           | mRNA    | 0.572519854 | 1.15E-04    |
| hsa_circ_0096355 | circRNA | 0.572337945 | 0.015892126 |
| hsa_circ_0046808 | circRNA | 0.572242611 | 0.044461959 |
| hsa_circ_0018810 | circRNA | 0.572048115 | 0.004454615 |
| IKBIP            | mRNA    | 0.572046702 | 2.13E-08    |
| A2M              | mRNA    | 0.571902135 | 0.002050635 |
| P4HA1            | mRNA    | 0.571417937 | 3.07E-04    |
| KIAA1841         | mRNA    | 0.571346894 | 6.74E-04    |
| hsa_circ_0040696 | circRNA | 0.571332679 | 0.011636689 |
| ANKRD40          | mRNA    | 0.570985441 | 0.00975883  |
| FKBP14           | mRNA    | 0.570677585 | 0.010492623 |
| ZNF799           | mRNA    | 0.570364089 | 0.001302545 |
| hsa_circ_0107780 | circRNA | 0.570221694 | 0.041630541 |
| SLC39A13         | mRNA    | 0.570001032 | 2.10E-05    |
| EBLN3P           | pseudo  | 0.56982745  | 8.07E-07    |
| hsa_circ_0069243 | circRNA | 0.569784059 | 0.013083524 |
| hsa_circ_0094256 | circRNA | 0.56964693  | 0.007498735 |
| hsa_circ_0067024 | circRNA | 0.569303399 | 0.007405982 |
| C15orf39         | mRNA    | 0.568664009 | 0.042178912 |
| HEMK1            | mRNA    | 0.568654221 | 5.57E-04    |
| COG6             | mRNA    | 0.568542948 | 1.89E-05    |
| GRK5             | mRNA    | 0.568476028 | 0.015481943 |
| CYP20A1          | mRNA    | 0.568258828 | 4.99E-10    |
| RRAS             | mRNA    | 0.568211586 | 0.001117808 |
| LARP1B           | mRNA    | 0.567788795 | 8.04E-05    |



|                  |         |             |             |
|------------------|---------|-------------|-------------|
| hsa_circ_0028951 | circRNA | 0.567778869 | 0.0086266   |
| hsa_circ_0068221 | circRNA | 0.567566729 | 0.010894714 |
| ZFYVE28          | mRNA    | 0.567526846 | 2.17E-10    |
| hsa_circ_0134988 | circRNA | 0.567404231 | 0.013244599 |
| KLF9             | mRNA    | 0.56712806  | 0.046757085 |
| hsa_circ_0014934 | circRNA | 0.567097089 | 0.011636689 |
| C2CD2L           | mRNA    | 0.567070996 | 0.009212654 |
| hsa_circ_0004467 | circRNA | 0.566994735 | 0.037962713 |
| hsa_circ_0101132 | circRNA | 0.565836405 | 0.035346271 |
| hsa_circ_0027461 | circRNA | 0.565573197 | 0.007498735 |
| IQCE             | mRNA    | 0.56548266  | 1.38E-04    |
| PPP1R18          | mRNA    | 0.564937136 | 0.039821756 |
| TNFAIP1          | mRNA    | 0.564478008 | 7.09E-07    |
| hsa_circ_0036780 | circRNA | 0.563501225 | 0.005689146 |
| hsa_circ_0096172 | circRNA | 0.563483429 | 0.00676003  |
| PTGES2-AS1       | lncRNA  | 0.563474131 | 0.036891901 |
| hsa_circ_0067189 | circRNA | 0.563094953 | 6.00E-04    |
| hsa_circ_0057333 | circRNA | 0.56283638  | 0.007811709 |
| CD81             | mRNA    | 0.562401986 | 6.17E-04    |
| CSNK1G2          | mRNA    | 0.561996094 | 4.86E-05    |
| hsa_circ_0101788 | circRNA | 0.56176235  | 0.001296719 |
| ATP8B1           | mRNA    | 0.561570823 | 0.005096109 |
| COPA             | mRNA    | 0.561446288 | 2.42E-08    |
| hsa_circ_0007000 | circRNA | 0.561027839 | 0.002422279 |
| hsa_circ_0061707 | circRNA | 0.560784243 | 0.043187929 |

|                  |         |             |             |
|------------------|---------|-------------|-------------|
| hsa_circ_0031054 | circRNA | 0.560664802 | 0.027721962 |
| SREBF1           | mRNA    | 0.560640495 | 0.021963044 |
| TRPM4            | mRNA    | 0.56018849  | 0.037184711 |
| PLPPR2           | mRNA    | 0.559130461 | 1.40E-06    |
| hsa_circ_0127087 | circRNA | 0.55887305  | 0.001756843 |
| SLC26A6          | mRNA    | 0.558849523 | 0.004355556 |
| hsa_circ_0068306 | circRNA | 0.558578964 | 0.032844494 |
| hsa_circ_0009357 | circRNA | 0.55849089  | 0.020706617 |
| hsa_circ_0025292 | circRNA | 0.558448563 | 0.002313442 |
| hsa_circ_0096403 | circRNA | 0.55838952  | 0.022461612 |
| ITPRIPL2         | mRNA    | 0.558317305 | 0.00511032  |
| hsa_circ_0043244 | circRNA | 0.557998746 | 0.017171743 |
| hsa_circ_0002676 | circRNA | 0.557863204 | 0.002741436 |
| hsa_circ_0001848 | circRNA | 0.557631672 | 0.015023785 |
| TTLL7            | mRNA    | 0.556943454 | 0.016797255 |
| hsa_circ_0095123 | circRNA | 0.556589163 | 0.00707892  |
| UBE2D4           | mRNA    | 0.556281587 | 0.003329689 |
| DCLK2            | mRNA    | 0.556229674 | 0.001676746 |
| MMP15            | mRNA    | 0.555721393 | 0.009789511 |
| hsa_circ_0016550 | circRNA | 0.555677222 | 0.048667815 |
| hsa_circ_0009356 | circRNA | 0.555477729 | 0.033110565 |
| hsa_circ_0014930 | circRNA | 0.555416827 | 0.00226014  |
| hsa_circ_0136217 | circRNA | 0.555067804 | 0.001983687 |
| POGLUT1          | mRNA    | 0.554873115 | 5.39E-04    |
| ATP13A1          | mRNA    | 0.55472185  | 5.18E-05    |

|                  |         |             |             |
|------------------|---------|-------------|-------------|
| SYNE1            | mRNA    | 0.554166934 | 0.022933752 |
| TIMP1            | mRNA    | 0.554058152 | 2.44E-06    |
| hsa_circ_0020802 | circRNA | 0.553625412 | 0.00137368  |
| SH2B3            | mRNA    | 0.553501129 | 8.52E-04    |
| hsa_circ_0097529 | circRNA | 0.55347487  | 0.005553795 |
| hsa_circ_0067555 | circRNA | 0.552780725 | 8.72E-04    |
| C2orf76          | mRNA    | 0.552700014 | 0.005963302 |
| hsa_circ_0083216 | circRNA | 0.552461656 | 0.011842673 |
| hsa_circ_0042308 | circRNA | 0.55165206  | 0.018295239 |
| hsa_circ_0115730 | circRNA | 0.551160197 | 0.036292609 |
| hsa_circ_0086397 | circRNA | 0.550888377 | 0.039740662 |
| MGST2            | mRNA    | 0.550363797 | 7.02E-06    |
| PPAN-P2RY11      | mRNA    | 0.550042997 | 0.002526666 |
| hsa_circ_0101790 | circRNA | 0.5497169   | 0.001332982 |
| hsa_circ_0007264 | circRNA | 0.5493764   | 0.006277854 |
| hsa_circ_0014361 | circRNA | 0.549365047 | 0.025397611 |
| hsa_circ_0109158 | circRNA | 0.548563645 | 0.008869339 |
| hsa_circ_0003376 | circRNA | 0.547805661 | 0.021992611 |
| SPATA2L          | mRNA    | 0.547767989 | 0.002534473 |
| SGTB             | mRNA    | 0.5477559   | 0.013019932 |
| MINAR1           | mRNA    | 0.54741399  | 0.039840706 |
| hsa_circ_0059050 | circRNA | 0.547392545 | 0.030822295 |
| IER3IP1          | mRNA    | 0.547089823 | 0.006249572 |
| IFT20            | mRNA    | 0.546545085 | 3.77E-04    |
| hsa_circ_0024051 | circRNA | 0.546066833 | 0.022180757 |

|                  |         |             |             |
|------------------|---------|-------------|-------------|
| hsa_circ_0090447 | circRNA | 0.545807992 | 0.037941183 |
| SERPINB8         | mRNA    | 0.545310348 | 0.00947183  |
| hsa_circ_0096643 | circRNA | 0.54528666  | 0.031325204 |
| hsa_circ_0094354 | circRNA | 0.54494339  | 0.001472761 |
| PVRIG2P          | pseudo  | 0.54487661  | 0.01489954  |
| hsa_circ_0078098 | circRNA | 0.544737226 | 0.045843499 |
| PDIA5            | mRNA    | 0.543896457 | 7.57E-04    |
| hsa_circ_0096354 | circRNA | 0.543712437 | 8.79E-04    |
| hsa_circ_0029345 | circRNA | 0.543703068 | 0.032668037 |
| hsa_circ_0079282 | circRNA | 0.543437027 | 0.011801801 |
| GBF1             | mRNA    | 0.543407713 | 1.07E-04    |
| MLEC             | mRNA    | 0.543260211 | 0.026843007 |
| SEC11C           | mRNA    | 0.54319792  | 0.02992686  |
| hsa_circ_0026131 | circRNA | 0.543187741 | 0.022422157 |
| hsa_circ_0075174 | circRNA | 0.543100292 | 0.018387706 |
| hsa_circ_0055345 | circRNA | 0.543092432 | 0.007055848 |
| GARS             | mRNA    | 0.543053379 | 0.004842361 |
| hsa_circ_0001227 | circRNA | 0.542791094 | 0.02853803  |
| ZNF70            | mRNA    | 0.542684601 | 0.001904273 |
| hsa_circ_0039546 | circRNA | 0.54265304  | 0.00668815  |
| hsa_circ_0074886 | circRNA | 0.542270209 | 0.024687657 |
| SHISA5           | mRNA    | 0.542243234 | 4.33E-05    |
| GLT8D1           | mRNA    | 0.542098354 | 4.01E-08    |
| hsa_circ_0006791 | circRNA | 0.541884591 | 0.008768531 |
| HPCAL1           | mRNA    | 0.541550971 | 0.018920711 |

|                  |         |             |             |
|------------------|---------|-------------|-------------|
| hsa_circ_0036203 | circRNA | 0.541138277 | 0.041032602 |
| KLF6             | mRNA    | 0.541058008 | 8.55E-06    |
| hsa_circ_0026136 | circRNA | 0.540486208 | 0.027373375 |
| LOC100506571     | lncRNA  | 0.540448572 | 0.013785833 |
| hsa_circ_0059701 | circRNA | 0.540418353 | 0.007331861 |
| HM13             | mRNA    | 0.539850441 | 2.38E-06    |
| GNL3             | mRNA    | 0.539630177 | 0.004537643 |
| ZNF275           | mRNA    | 0.539268651 | 2.83E-04    |
| hsa_circ_0067556 | circRNA | 0.538814234 | 0.03313518  |
| hsa_circ_0067014 | circRNA | 0.53841848  | 0.024762495 |
| hsa_circ_0059699 | circRNA | 0.538408879 | 0.00357183  |
| hsa_circ_0119649 | circRNA | 0.538372299 | 0.032435572 |
| ALG3             | mRNA    | 0.53820986  | 0.003330702 |
| PNPLA8           | mRNA    | 0.537784383 | 9.43E-04    |
| RNF216P1         | pseudo  | 0.537570482 | 2.82E-05    |
| ZNFX1            | mRNA    | 0.537531723 | 1.61E-05    |
| hsa_circ_0065844 | circRNA | 0.537207833 | 5.26E-04    |
| SLC36A1          | mRNA    | 0.537052877 | 0.00838653  |
| hsa_circ_0056490 | circRNA | 0.536958249 | 0.010722404 |
| CNOT9            | mRNA    | 0.536374273 | 0.012245075 |
| MOB3C            | mRNA    | 0.536317408 | 0.011169518 |
| UVSSA            | mRNA    | 0.536099286 | 0.001336925 |
| hsa_circ_0134661 | circRNA | 0.535837954 | 0.00362502  |
| CAP1             | mRNA    | 0.535435617 | 0.001127167 |
| hsa_circ_0132969 | circRNA | 0.535251165 | 0.036371598 |

|                  |         |             |             |
|------------------|---------|-------------|-------------|
| hsa_circ_0038986 | circRNA | 0.5346062   | 0.001605755 |
| hsa_circ_0001421 | circRNA | 0.534415912 | 0.002106136 |
| TMEM208          | mRNA    | 0.534379889 | 3.59E-04    |
| ITGA6            | mRNA    | 0.534256698 | 0.00604998  |
| hsa_circ_0022670 | circRNA | 0.5338614   | 0.026954203 |
| TTL11            | mRNA    | 0.533554192 | 1.73E-05    |
| hsa_circ_0011989 | circRNA | 0.53319873  | 0.009302894 |
| hsa_circ_0006618 | circRNA | 0.532308386 | 0.002903763 |
| hsa_circ_0094124 | circRNA | 0.532177414 | 0.036050386 |
| GPX8             | mRNA    | 0.532049856 | 0.042525181 |
| CYB561D2         | mRNA    | 0.531837422 | 0.032841329 |
| GRAMD4           | mRNA    | 0.53177589  | 2.33E-04    |
| hsa_circ_0062359 | circRNA | 0.531747013 | 0.026881972 |
| DPP9             | mRNA    | 0.531585751 | 6.06E-04    |
| NXPE3            | mRNA    | 0.531526919 | 0.015651164 |
| hsa_circ_0059697 | circRNA | 0.531218034 | 0.001272316 |
| C1orf198         | mRNA    | 0.531007126 | 1.25E-05    |
| hsa_circ_0023885 | circRNA | 0.530467872 | 0.043332833 |
| hsa_circ_0121196 | circRNA | 0.53033352  | 0.012899173 |
| hsa_circ_0019068 | circRNA | 0.530137422 | 0.001041202 |
| CBX2             | mRNA    | 0.52990255  | 0.006171388 |
| hsa_circ_0029350 | circRNA | 0.529856202 | 0.00325145  |
| hsa_circ_0036796 | circRNA | 0.529545641 | 0.03891606  |
| TMEM273          | mRNA    | 0.529540244 | 0.029369075 |
| hsa_circ_0098198 | circRNA | 0.529487137 | 0.006622995 |

|                  |         |             |             |
|------------------|---------|-------------|-------------|
| SLC30A1          | mRNA    | 0.529435112 | 1.05E-04    |
| hsa_circ_0068346 | circRNA | 0.529257426 | 0.033639362 |
| hsa_circ_0021889 | circRNA | 0.528924037 | 0.018198725 |
| B4GALT2          | mRNA    | 0.528741274 | 0.022439881 |
| hsa_circ_0019715 | circRNA | 0.528654781 | 0.008122375 |
| hsa_circ_0075208 | circRNA | 0.52863346  | 0.034740498 |
| RPL23AP53        | pseudo  | 0.52852379  | 0.010853037 |
| KLF16            | mRNA    | 0.528230579 | 0.012857171 |
| hsa_circ_0101148 | circRNA | 0.52805846  | 0.007606906 |
| hsa_circ_0111785 | circRNA | 0.528037131 | 0.001108113 |
| CPEB4            | mRNA    | 0.527555104 | 0.01600153  |
| hsa_circ_0041800 | circRNA | 0.527452671 | 0.01852778  |
| hsa_circ_0087553 | circRNA | 0.527428667 | 0.010678106 |
| GTPBP2           | mRNA    | 0.52700124  | 0.001352567 |
| SLC20A1          | mRNA    | 0.52653267  | 0.013314944 |
| hsa_circ_0069371 | circRNA | 0.526528383 | 0.018274245 |
| hsa_circ_0009000 | circRNA | 0.526271806 | 0.014854053 |
| hsa_circ_0061344 | circRNA | 0.525852846 | 0.014475145 |
| AMOTL1           | mRNA    | 0.525685505 | 0.001486947 |
| MFSD14A          | mRNA    | 0.525340024 | 5.01E-06    |
| hsa_circ_0020197 | circRNA | 0.525176413 | 0.01670908  |
| hsa_circ_0087223 | circRNA | 0.524641946 | 0.008765722 |
| hsa_circ_0061339 | circRNA | 0.524361113 | 0.003346558 |
| hsa_circ_0067033 | circRNA | 0.524197963 | 0.004172526 |
| ACKR3            | mRNA    | 0.52391556  | 0.038998391 |

|                  |         |             |             |
|------------------|---------|-------------|-------------|
| SPTY2D1          | mRNA    | 0.523491433 | 2.70E-05    |
| hsa_circ_0023935 | circRNA | 0.522986188 | 0.007811709 |
| hsa_circ_0024719 | circRNA | 0.522854994 | 0.015731173 |
| SLK              | mRNA    | 0.522706611 | 0.045326452 |
| hsa_circ_0074807 | circRNA | 0.522625918 | 0.019899479 |
| HTT              | mRNA    | 0.52248901  | 5.31E-05    |
| PIR              | mRNA    | 0.521766728 | 0.022804419 |
| ORMDL3           | mRNA    | 0.521590106 | 5.80E-05    |
| DTX3L            | mRNA    | 0.521216586 | 0.001281937 |
| TRIM35           | mRNA    | 0.521120234 | 6.01E-05    |
| ADPRH            | mRNA    | 0.520579647 | 4.85E-04    |
| hsa_circ_0051989 | circRNA | 0.520222207 | 0.033639362 |
| hsa_circ_0078439 | circRNA | 0.520166638 | 0.004334107 |
| RAB33B           | mRNA    | 0.519365955 | 0.001147731 |
| hsa_circ_0009020 | circRNA | 0.519364489 | 0.003142239 |
| MOGS             | mRNA    | 0.518912613 | 3.59E-04    |
| hsa_circ_0003183 | circRNA | 0.518105264 | 0.025918147 |
| TMED7-TICAM2     | mRNA    | 0.517915067 | 1.85E-05    |
| CPNE2            | mRNA    | 0.517167899 | 8.11E-07    |
| KLC2             | mRNA    | 0.517068206 | 0.024489308 |
| BNIP1            | mRNA    | 0.516907303 | 6.67E-04    |
| hsa_circ_0027462 | circRNA | 0.516471718 | 0.016969279 |
| hsa_circ_0002885 | circRNA | 0.516127513 | 0.031508736 |
| hsa_circ_0016769 | circRNA | 0.516057838 | 0.033066803 |
| ANO6             | mRNA    | 0.516020138 | 6.34E-04    |



|                  |         |             |             |
|------------------|---------|-------------|-------------|
| hsa_circ_0101119 | circRNA | 0.515504571 | 0.003131674 |
| SHROOM4          | mRNA    | 0.514602108 | 7.68E-04    |
| P3H1             | mRNA    | 0.514418913 | 0.010875168 |
| PHLDA3           | mRNA    | 0.514091058 | 0.040043139 |
| STEAP3           | mRNA    | 0.513987912 | 0.030492088 |
| SCAMP2           | mRNA    | 0.513615498 | 5.46E-07    |
| PCYT1A           | mRNA    | 0.513182831 | 4.27E-06    |
| LOC642852        | lncRNA  | 0.513102062 | 0.005214513 |
| S100A10          | mRNA    | 0.51300805  | 0.01599232  |
| BAK1             | mRNA    | 0.512796898 | 0.00516974  |
| C22orf23         | mRNA    | 0.512674471 | 0.001964922 |
| IFT27            | mRNA    | 0.51251793  | 1.96E-04    |
| PJA2             | mRNA    | 0.512488141 | 1.75E-07    |
| TECPR1           | mRNA    | 0.512295504 | 6.99E-05    |
| CD109            | mRNA    | 0.511964973 | 0.014446378 |
| CDYL2            | mRNA    | 0.511651364 | 0.013714339 |
| hsa_circ_0038984 | circRNA | 0.511643977 | 0.015111569 |
| hsa_circ_0128358 | circRNA | 0.511258287 | 0.007994848 |
| CDC42SE1         | mRNA    | 0.511080926 | 0.004364412 |
| LOC101927979     | lncRNA  | 0.510907226 | 0.00346323  |
| hsa_circ_0098199 | circRNA | 0.510785952 | 0.040164139 |
| CENPB1P1         | pseudo  | 0.510585594 | 0.001149992 |
| hsa_circ_0042617 | circRNA | 0.510270601 | 0.002380564 |
| IRF7             | mRNA    | 0.509707837 | 0.00511032  |
| hsa_circ_0014892 | circRNA | 0.509595534 | 0.026992389 |

|                  |         |             |             |
|------------------|---------|-------------|-------------|
| VPS37C           | mRNA    | 0.509567601 | 0.00529158  |
| hsa_circ_0105072 | circRNA | 0.509368145 | 0.030509234 |
| hsa_circ_0075202 | circRNA | 0.508901047 | 0.035760882 |
| DSTN             | mRNA    | 0.50878024  | 1.57E-04    |
| LOC101927809     | lncRNA  | 0.507715975 | 0.034615593 |
| hsa_circ_0121907 | circRNA | 0.507623618 | 0.012369028 |
| EDEM1            | mRNA    | 0.507410642 | 0.002275436 |
| SNHG15           | lncRNA  | 0.507193315 | 0.031111497 |
| DEGS1            | mRNA    | 0.506854002 | 2.82E-06    |
| hsa_circ_0116686 | circRNA | 0.506470332 | 0.008622301 |
| hsa_circ_0023342 | circRNA | 0.506415919 | 0.006385788 |
| hsa_circ_0044441 | circRNA | 0.506306051 | 0.009295291 |
| hsa_circ_0000976 | circRNA | 0.506233881 | 0.031014981 |
| SEC23B           | mRNA    | 0.506034661 | 5.46E-04    |
| ZBTB11-AS1       | lncRNA  | 0.505781546 | 0.0015953   |
| hsa_circ_0031725 | circRNA | 0.50572921  | 0.006831727 |
| hsa_circ_0014925 | circRNA | 0.505615093 | 9.50E-05    |
| hsa_circ_0055389 | circRNA | 0.505492192 | 1.91E-04    |
| KLHL2            | mRNA    | 0.505472011 | 7.70E-06    |
| hsa_circ_0000008 | circRNA | 0.5053653   | 0.005018172 |
| RIOX2            | mRNA    | 0.505320256 | 0.006975051 |
| JOSD1            | mRNA    | 0.505045711 | 0.00670701  |
| UBN1             | mRNA    | 0.504824596 | 6.06E-04    |
| DAP              | mRNA    | 0.504708162 | 1.34E-10    |
| KIAA1671         | mRNA    | 0.50395197  | 0.047019247 |

|                  |         |             |             |
|------------------|---------|-------------|-------------|
| TMED2            | mRNA    | 0.503881284 | 0.001436338 |
| hsa_circ_0024767 | circRNA | 0.503712079 | 0.003627708 |
| hsa_circ_0053047 | circRNA | 0.503350905 | 0.041046313 |
| SNX9             | mRNA    | 0.503283646 | 0.004889114 |
| MPZL1            | mRNA    | 0.503170525 | 0.001280216 |
| hsa_circ_0038992 | circRNA | 0.503143455 | 0.0010897   |
| hsa_circ_0004700 | circRNA | 0.503106494 | 0.013658273 |
| hsa_circ_0119498 | circRNA | 0.502739519 | 0.006553758 |
| ARCN1            | mRNA    | 0.502646849 | 3.43E-05    |
| hsa_circ_0050905 | circRNA | 0.502397117 | 0.03745765  |
| hsa_circ_0065649 | circRNA | 0.502289663 | 3.83E-04    |
| SEC14L2          | mRNA    | 0.502181519 | 8.62E-06    |
| BCL3             | mRNA    | 0.501924556 | 0.014057404 |
| NCDN             | mRNA    | 0.501827907 | 0.012057252 |
| IL6R             | mRNA    | 0.501562166 | 0.001442639 |
| ZNF398           | mRNA    | 0.501009247 | 2.79E-05    |
| ESRRA            | mRNA    | 0.500469002 | 0.036754637 |
| NXT1             | mRNA    | 0.500211219 | 0.036968257 |
| APOL1            | mRNA    | 0.499540929 | 0.00667866  |
| DNAJC2           | mRNA    | 0.499536001 | 0.001663343 |
| TMEM243          | mRNA    | 0.499181412 | 1.22E-04    |
| ZDHHC16          | mRNA    | 0.499145316 | 0.002017158 |
| hsa_circ_0007984 | circRNA | 0.498731154 | 0.030916745 |
| NANS             | mRNA    | 0.49861869  | 0.003179779 |
| CBR1             | mRNA    | 0.498484402 | 0.043707024 |

|                  |         |             |             |
|------------------|---------|-------------|-------------|
| ZNF841           | mRNA    | 0.498387068 | 2.19E-04    |
| RABL3            | mRNA    | 0.498353067 | 0.002455251 |
| GDI1             | mRNA    | 0.498198873 | 3.74E-05    |
| NPDC1            | mRNA    | 0.498083482 | 3.30E-06    |
| TYRO3            | mRNA    | 0.49768302  | 0.02509908  |
| TMEM267          | mRNA    | 0.497521123 | 0.007758782 |
| DPM2             | mRNA    | 0.497518574 | 0.013386303 |
| TUT1             | mRNA    | 0.497269441 | 1.81E-04    |
| CYTH1            | mRNA    | 0.497147693 | 0.003266078 |
| PLPBP            | mRNA    | 0.497051448 | 1.98E-07    |
| NOL6             | mRNA    | 0.496753663 | 0.024177724 |
| hsa_circ_0011877 | circRNA | 0.496637706 | 0.014276655 |
| ARHGEF3          | mRNA    | 0.496324436 | 0.032231143 |
| hsa_circ_0004882 | circRNA | 0.495600242 | 0.03697731  |
| PIBF1            | mRNA    | 0.495441204 | 2.63E-08    |
| SLC2A13          | mRNA    | 0.495205552 | 0.042481714 |
| TBC1D24          | mRNA    | 0.494884559 | 0.010483651 |
| TUBB6            | mRNA    | 0.494625541 | 0.032727052 |
| ARFIP2           | mRNA    | 0.494150734 | 1.89E-04    |
| RIPOR1           | mRNA    | 0.493548432 | 4.02E-06    |
| hsa_circ_0020799 | circRNA | 0.493537215 | 0.018198725 |
| CLINT1           | mRNA    | 0.493487268 | 0.001506895 |
| TPD52L2          | mRNA    | 0.49332716  | 7.71E-07    |
| SURF4            | mRNA    | 0.493239329 | 0.00277115  |
| hsa_circ_0124517 | circRNA | 0.493221886 | 0.044507398 |

|                  |         |             |             |
|------------------|---------|-------------|-------------|
| DRAM1            | mRNA    | 0.492762455 | 5.51E-04    |
| ANKRD13D         | mRNA    | 0.49259487  | 0.00168839  |
| COG3             | mRNA    | 0.491458373 | 3.00E-06    |
| B3GNTL1          | mRNA    | 0.491402433 | 0.013483886 |
| hsa_circ_0084601 | circRNA | 0.491388301 | 0.040734076 |
| DVL1             | mRNA    | 0.491271759 | 0.008429503 |
| HIVEP3           | mRNA    | 0.491270531 | 8.27E-05    |
| hsa_circ_0089542 | circRNA | 0.491230043 | 0.018262448 |
| EEF2KMT          | mRNA    | 0.49099923  | 0.011138188 |
| hsa_circ_0059695 | circRNA | 0.49095864  | 0.002811776 |
| NAA80            | mRNA    | 0.490699053 | 0.028299413 |
| PROSER3          | mRNA    | 0.490482509 | 0.015991755 |
| DPH3             | mRNA    | 0.490410874 | 0.004304977 |
| CIC              | mRNA    | 0.489918763 | 0.003382681 |
| BTG3             | mRNA    | 0.489541091 | 0.034043983 |
| B4GALT7          | mRNA    | 0.489301562 | 0.003330194 |
| ALDOA            | mRNA    | 0.489288329 | 0.001453551 |
| SCYL1            | mRNA    | 0.489194419 | 5.28E-04    |
| KDELC2           | mRNA    | 0.488977012 | 0.002734992 |
| hsa_circ_0067317 | circRNA | 0.488185487 | 0.00499562  |
| PELO             | mRNA    | 0.488139167 | 0.010020892 |
| PTP4A1           | mRNA    | 0.488017245 | 0.001985633 |
| S1PR2            | mRNA    | 0.487886802 | 0.033711074 |
| STAM2            | mRNA    | 0.487429854 | 1.64E-05    |
| hsa_circ_0092075 | circRNA | 0.487106666 | 0.005180533 |

|                  |         |             |             |
|------------------|---------|-------------|-------------|
| ABHD15           | mRNA    | 0.486955227 | 0.007976783 |
| hsa_circ_0061338 | circRNA | 0.486877228 | 0.014581404 |
| hsa_circ_0007841 | circRNA | 0.486819026 | 0.02190769  |
| hsa_circ_0064089 | circRNA | 0.486757334 | 0.032625784 |
| hsa_circ_0085282 | circRNA | 0.486665116 | 0.009578232 |
| DYNC1LI2         | mRNA    | 0.48645278  | 6.92E-04    |
| AMPD2            | mRNA    | 0.486243635 | 0.017112845 |
| HILPDA           | mRNA    | 0.486136523 | 0.016357326 |
| OXR1             | mRNA    | 0.485826094 | 0.009120883 |
| RASIP1           | mRNA    | 0.485372972 | 4.22E-07    |
| hsa_circ_0057016 | circRNA | 0.485363494 | 0.008913798 |
| hsa_circ_0011994 | circRNA | 0.485179001 | 0.009325262 |
| ZC3HAV1L         | mRNA    | 0.485146218 | 0.011494938 |
| hsa_circ_0085431 | circRNA | 0.485075845 | 0.035012283 |
| hsa_circ_0024787 | circRNA | 0.484691391 | 0.035022915 |
| TAP2             | mRNA    | 0.484085718 | 6.00E-04    |
| hsa_circ_0075311 | circRNA | 0.483980116 | 0.013956158 |
| hsa_circ_0046237 | circRNA | 0.483879069 | 0.043791765 |
| IKBKG            | mRNA    | 0.483636166 | 0.006759386 |
| hsa_circ_0051923 | circRNA | 0.483191439 | 0.007468776 |
| hsa_circ_0055387 | circRNA | 0.483039768 | 6.02E-04    |
| hsa_circ_0026895 | circRNA | 0.48284189  | 0.013255935 |
| LOC100506544     | lncRNA  | 0.482627834 | 0.044815957 |
| RAB1A            | mRNA    | 0.482553677 | 4.71E-05    |
| LOC107987141     | lncRNA  | 0.482551711 | 0.018528139 |

|                  |         |             |             |
|------------------|---------|-------------|-------------|
| FKBP7            | mRNA    | 0.482367601 | 0.022072044 |
| TREX1            | mRNA    | 0.482322127 | 0.035816474 |
| CYB5B            | mRNA    | 0.482144562 | 0.032015113 |
| PRXL2B           | mRNA    | 0.48204316  | 9.19E-07    |
| hsa_circ_0007581 | circRNA | 0.482016437 | 0.020099604 |
| hsa_circ_0002450 | circRNA | 0.481791884 | 0.010585962 |
| SCFD1            | mRNA    | 0.481438328 | 9.55E-08    |
| hsa_circ_0110971 | circRNA | 0.481406969 | 8.23E-04    |
| ARHGAP21         | mRNA    | 0.48135771  | 1.90E-06    |
| PI4K2B           | mRNA    | 0.48131637  | 0.003533234 |
| UTP6             | mRNA    | 0.480590339 | 9.51E-04    |
| hsa_circ_0090451 | circRNA | 0.480461915 | 0.001977901 |
| NAAA             | mRNA    | 0.480461654 | 0.001529997 |
| PYGB             | mRNA    | 0.479762983 | 1.84E-06    |
| ZBTB7A           | mRNA    | 0.479419328 | 9.07E-04    |
| hsa_circ_0069778 | circRNA | 0.479384997 | 0.034163868 |
| OSTF1            | mRNA    | 0.479207273 | 0.016509196 |
| hsa_circ_0083932 | circRNA | 0.479133481 | 0.030505626 |
| hsa_circ_0109465 | circRNA | 0.479091218 | 0.038803904 |
| GORAB            | mRNA    | 0.479079868 | 0.003104675 |
| SLC27A4          | mRNA    | 0.478692186 | 0.00629434  |
| CRLS1            | mRNA    | 0.478592501 | 0.001382415 |
| EPM2A            | mRNA    | 0.478385975 | 0.036871972 |
| ITGA3            | mRNA    | 0.477716547 | 3.75E-04    |
| hsa_circ_0031705 | circRNA | 0.477712746 | 0.00556922  |

|                  |         |             |             |
|------------------|---------|-------------|-------------|
| C10orf88         | mRNA    | 0.477459904 | 0.043762926 |
| DOK4             | mRNA    | 0.477246963 | 6.15E-04    |
| hsa_circ_0085278 | circRNA | 0.477161213 | 0.045326933 |
| CTU2             | mRNA    | 0.477063796 | 0.011193001 |
| hsa_circ_0111190 | circRNA | 0.477060412 | 0.029819458 |
| TMEM50B          | mRNA    | 0.476764242 | 0.039065188 |
| ARHGEF10         | mRNA    | 0.476505362 | 0.034460082 |
| LINC01465        | lncRNA  | 0.476343034 | 0.033932816 |
| hsa_circ_0000652 | circRNA | 0.476255218 | 0.048878554 |
| TNIP2            | mRNA    | 0.476046928 | 6.82E-04    |
| hsa_circ_0044445 | circRNA | 0.47582668  | 0.038843756 |
| DERL1            | mRNA    | 0.475525712 | 0.001532215 |
| SEL1L3           | mRNA    | 0.475416666 | 0.018606332 |
| PLEKHM1          | mRNA    | 0.475211266 | 0.005967476 |
| hsa_circ_0104862 | circRNA | 0.475210182 | 0.028816929 |
| hsa_circ_0008895 | circRNA | 0.474824431 | 0.034667457 |
| UBE2E2           | mRNA    | 0.4747453   | 0.009190483 |
| hsa_circ_0086620 | circRNA | 0.474741345 | 0.00130444  |
| TEAD4            | mRNA    | 0.474641366 | 0.007917534 |
| hsa_circ_0128731 | circRNA | 0.473838716 | 0.017145413 |
| SLC9B2           | mRNA    | 0.473615234 | 0.004708654 |
| hsa_circ_0074676 | circRNA | 0.473256807 | 0.011881443 |
| GNL2             | mRNA    | 0.473255717 | 0.011511807 |
| SERF2            | mRNA    | 0.47321536  | 1.23E-04    |
| ROM1             | mRNA    | 0.472947337 | 0.038983736 |



|                  |         |             |             |
|------------------|---------|-------------|-------------|
| MANCR            | lncRNA  | 0.472764579 | 0.019942874 |
| hsa_circ_0024789 | circRNA | 0.472362237 | 0.019745806 |
| RTN4             | mRNA    | 0.472082324 | 0.024177724 |
| hsa_circ_0014932 | circRNA | 0.471862599 | 0.002156578 |
| GIMAP6           | mRNA    | 0.47128268  | 1.08E-05    |
| hsa_circ_0101146 | circRNA | 0.470882021 | 0.03624142  |
| HMOX2            | mRNA    | 0.470677387 | 0.010236875 |
| SEC61A1          | mRNA    | 0.470325657 | 2.11E-04    |
| GCN1             | mRNA    | 0.469758459 | 0.009472065 |
| TSPAN14          | mRNA    | 0.469751718 | 1.88E-05    |
| hsa_circ_0125390 | circRNA | 0.469311322 | 0.018059318 |
| hsa_circ_0079716 | circRNA | 0.469188048 | 0.040380972 |
| TCP11L1          | mRNA    | 0.469158778 | 2.65E-07    |
| hsa_circ_0074659 | circRNA | 0.469037334 | 0.013624672 |
| hsa_circ_0024975 | circRNA | 0.468927588 | 0.045755063 |
| hsa_circ_0073984 | circRNA | 0.468923413 | 0.037561177 |
| hsa_circ_0055388 | circRNA | 0.468829283 | 0.001847128 |
| PTRH2            | mRNA    | 0.468824212 | 0.012645233 |
| CKAP4            | mRNA    | 0.46870585  | 0.020730735 |
| COG5             | mRNA    | 0.468685694 | 3.85E-05    |
| LYSMD3           | mRNA    | 0.468523177 | 0.00208844  |
| GRASP            | mRNA    | 0.468504138 | 0.008235778 |
| hsa_circ_0023894 | circRNA | 0.468262232 | 0.034752977 |
| FICD             | mRNA    | 0.468116752 | 0.001616135 |
| hsa_circ_0056489 | circRNA | 0.467667369 | 0.044677584 |

|                  |         |             |             |
|------------------|---------|-------------|-------------|
| ALAS1            | mRNA    | 0.467497401 | 0.019888109 |
| hsa_circ_0123690 | circRNA | 0.467453843 | 0.035329212 |
| ZNF805           | mRNA    | 0.467293504 | 2.01E-05    |
| NAT9             | mRNA    | 0.467213597 | 8.07E-06    |
| hsa_circ_0079726 | circRNA | 0.466664792 | 0.01852778  |
| hsa_circ_0063142 | circRNA | 0.466458056 | 0.015642334 |
| hsa_circ_0008982 | circRNA | 0.466409438 | 0.0173046   |
| TFE3             | mRNA    | 0.466226578 | 3.59E-04    |
| hsa_circ_0099944 | circRNA | 0.465998589 | 0.0311716   |
| ENSA             | mRNA    | 0.465798126 | 1.29E-05    |
| RARS             | mRNA    | 0.465445873 | 0.00127287  |
| hsa_circ_0057018 | circRNA | 0.465047691 | 0.012833241 |
| hsa_circ_0008702 | circRNA | 0.464778658 | 0.010894072 |
| hsa_circ_0024710 | circRNA | 0.464414285 | 0.015381553 |
| hsa_circ_0005589 | circRNA | 0.464201521 | 0.003662344 |
| SEC16A           | mRNA    | 0.464071118 | 0.003437504 |
| PCAT19           | lncRNA  | 0.463595063 | 0.007174106 |
| SBNO2            | mRNA    | 0.463393713 | 2.77E-04    |
| MPC1             | mRNA    | 0.463152536 | 0.001368254 |
| DMPK             | mRNA    | 0.463004708 | 0.015616169 |
| hsa_circ_0116690 | circRNA | 0.462969432 | 0.014178345 |
| hsa_circ_0004406 | circRNA | 0.462596858 | 0.039289188 |
| TIMMDC1          | mRNA    | 0.462530854 | 0.001247235 |
| CYB5A            | mRNA    | 0.462494353 | 0.001168871 |
| hsa_circ_0089559 | circRNA | 0.462157296 | 0.012022164 |

|                  |         |             |             |
|------------------|---------|-------------|-------------|
| KEAP1            | mRNA    | 0.461974923 | 0.001289198 |
| LOC100996724     | pseudo  | 0.461916528 | 0.028319775 |
| RAB11A           | mRNA    | 0.461497982 | 4.25E-07    |
| hsa_circ_0089362 | circRNA | 0.461384206 | 0.030713784 |
| hsa_circ_0027734 | circRNA | 0.461233038 | 0.029729905 |
| hsa_circ_0056007 | circRNA | 0.461125331 | 0.009992095 |
| ZC3H12A          | mRNA    | 0.461108771 | 0.043886609 |
| ATP6V0A2         | mRNA    | 0.460840725 | 0.004726018 |
| hsa_circ_0008368 | circRNA | 0.46046912  | 0.041610007 |
| FEZ1             | mRNA    | 0.459697521 | 0.001489154 |
| TOMM5            | mRNA    | 0.459599681 | 0.028155281 |
| MAP4             | mRNA    | 0.459504074 | 2.64E-05    |
| hsa_circ_0038971 | circRNA | 0.459458538 | 0.041126301 |
| hsa_circ_0055144 | circRNA | 0.458894852 | 0.044338902 |
| ZFPL1            | mRNA    | 0.458456153 | 5.75E-04    |
| SCML1            | mRNA    | 0.458319991 | 0.039635591 |
| ABCA2            | mRNA    | 0.458013869 | 1.25E-04    |
| TAP1             | mRNA    | 0.457975632 | 0.012115963 |
| SH3BP2           | mRNA    | 0.457950766 | 0.029196052 |
| ZNF25            | mRNA    | 0.45766603  | 0.031111497 |
| LOC105369623     | lncRNA  | 0.457636483 | 0.014828176 |
| JMJD4            | mRNA    | 0.457439055 | 0.032786776 |
| PUM3             | mRNA    | 0.456814489 | 0.045326452 |
| SMCHD1           | mRNA    | 0.456694953 | 0.006589546 |
| PDE8A            | mRNA    | 0.456384048 | 0.02269353  |

|                  |         |             |             |
|------------------|---------|-------------|-------------|
| RAP1A            | mRNA    | 0.455810828 | 0.030067911 |
| hsa_circ_0014201 | circRNA | 0.455671397 | 0.021390664 |
| SGSM3            | mRNA    | 0.455571111 | 4.59E-05    |
| hsa_circ_0104875 | circRNA | 0.455282556 | 0.012722816 |
| ZNF438           | mRNA    | 0.455110256 | 0.016207522 |
| UGGT2            | mRNA    | 0.454867587 | 0.014328254 |
| WDR44            | mRNA    | 0.454662348 | 6.97E-04    |
| hsa_circ_0128546 | circRNA | 0.454428735 | 0.025511133 |
| hsa_circ_0046122 | circRNA | 0.453769592 | 0.043232449 |
| hsa_circ_0089363 | circRNA | 0.453767257 | 0.016799152 |
| hsa_circ_0096138 | circRNA | 0.453493176 | 0.038206071 |
| NAB2             | mRNA    | 0.453169988 | 0.016605846 |
| ICMT             | mRNA    | 0.45316809  | 0.019942874 |
| FBXO8            | mRNA    | 0.453162518 | 5.07E-05    |
| hsa_circ_0084762 | circRNA | 0.45315668  | 0.017418583 |
| ANXA7            | mRNA    | 0.453035473 | 0.002418203 |
| CSRNP1           | mRNA    | 0.452948502 | 0.011525857 |
| hsa_circ_0006694 | circRNA | 0.452851961 | 0.011556589 |
| TMEM41B          | mRNA    | 0.45211564  | 0.005036647 |
| hsa_circ_0025626 | circRNA | 0.451941445 | 0.028796401 |
| hsa_circ_0058214 | circRNA | 0.451865158 | 0.02290569  |
| RNF145           | mRNA    | 0.451798144 | 0.029036492 |
| hsa_circ_0090452 | circRNA | 0.451759787 | 0.006821813 |
| RIN2             | mRNA    | 0.451696528 | 0.00948554  |
| TMEM231          | mRNA    | 0.451517539 | 0.010315771 |

|                  |         |             |             |
|------------------|---------|-------------|-------------|
| ATOX1            | mRNA    | 0.45069378  | 3.70E-05    |
| hsa_circ_0061345 | circRNA | 0.449484521 | 0.022105883 |
| EGFL7            | mRNA    | 0.449051188 | 0.00975883  |
| hsa_circ_0126057 | circRNA | 0.448407208 | 0.048600557 |
| PRCP             | mRNA    | 0.448266681 | 0.002135947 |
| hsa_circ_0002948 | circRNA | 0.448265885 | 0.012372677 |
| hsa_circ_0024338 | circRNA | 0.448184285 | 0.011080071 |
| hsa_circ_0037742 | circRNA | 0.448120285 | 0.015896611 |
| LARS             | mRNA    | 0.447590087 | 0.025192459 |
| DAG1             | mRNA    | 0.447356475 | 5.45E-09    |
| MTCL1            | mRNA    | 0.447150126 | 0.041703067 |
| ZNF622           | mRNA    | 0.447139753 | 0.001211464 |
| DNAJC24          | mRNA    | 0.446999698 | 0.043742211 |
| hsa_circ_0003029 | circRNA | 0.446099209 | 0.009741082 |
| ZMYND19          | mRNA    | 0.445155012 | 0.013224474 |
| MRPL33           | mRNA    | 0.444933406 | 0.032250579 |
| KIF26A           | mRNA    | 0.444895763 | 0.038417591 |
| DDA1             | mRNA    | 0.444512996 | 0.009391378 |
| INCA1            | mRNA    | 0.444486239 | 0.04048403  |
| hsa_circ_0038989 | circRNA | 0.444261226 | 0.014290402 |
| PDLIM7           | mRNA    | 0.444238328 | 0.02180423  |
| SSR1             | mRNA    | 0.44400039  | 0.013586703 |
| ITPRID2          | mRNA    | 0.443995144 | 5.41E-05    |
| OSTC             | mRNA    | 0.443991735 | 0.001184382 |
| GNA12            | mRNA    | 0.443783753 | 2.15E-04    |

|                  |         |             |             |
|------------------|---------|-------------|-------------|
| hsa_circ_0019716 | circRNA | 0.443449553 | 0.034104706 |
| NFIL3            | mRNA    | 0.443388882 | 0.009318079 |
| TMED3            | mRNA    | 0.443333348 | 0.001051412 |
| NOL3             | mRNA    | 0.442915091 | 0.041799331 |
| hsa_circ_0063088 | circRNA | 0.442836685 | 0.024266099 |
| MICALL1          | mRNA    | 0.442792595 | 4.71E-04    |
| RAB10            | mRNA    | 0.442691007 | 3.26E-04    |
| L3MBTL3          | mRNA    | 0.442686385 | 0.011097625 |
| hsa_circ_0001006 | circRNA | 0.442624338 | 0.010895491 |
| CMPK1            | mRNA    | 0.442210275 | 0.00899248  |
| hsa_circ_0023933 | circRNA | 0.442085658 | 0.03720775  |
| FASTK            | mRNA    | 0.441439094 | 3.83E-04    |
| MALINC1          | lncRNA  | 0.44138052  | 0.005763294 |
| WDR5B            | mRNA    | 0.441158511 | 7.17E-04    |
| hsa_circ_0095840 | circRNA | 0.441111813 | 0.039944272 |
| MDM2             | mRNA    | 0.440657275 | 0.020738187 |
| SLC15A3          | mRNA    | 0.440083447 | 0.04579236  |
| TNKS1BP1         | mRNA    | 0.439698974 | 0.001039687 |
| ARHGEF1          | mRNA    | 0.439462207 | 0.005135036 |
| TMEM39A          | mRNA    | 0.439237201 | 9.30E-04    |
| NDUFAF2          | mRNA    | 0.438914608 | 0.018891832 |
| DIS3             | mRNA    | 0.438780726 | 5.75E-04    |
| ZFP69            | mRNA    | 0.438696614 | 0.048851093 |
| SERP1            | mRNA    | 0.438690164 | 0.00462834  |
| PHPT1            | mRNA    | 0.43842694  | 0.01747924  |

|                  |         |             |             |
|------------------|---------|-------------|-------------|
| ZNF460           | mRNA    | 0.438118186 | 0.005287351 |
| BBS7             | mRNA    | 0.438009212 | 7.07E-05    |
| RABAC1           | mRNA    | 0.437690388 | 7.39E-04    |
| PSMG3            | mRNA    | 0.437528783 | 0.018386459 |
| hsa_circ_0116538 | circRNA | 0.43746181  | 0.016509994 |
| MTF1             | mRNA    | 0.436819049 | 0.001557683 |
| CSNK1E           | mRNA    | 0.436578915 | 0.037925278 |
| hsa_circ_0084757 | circRNA | 0.43574934  | 0.012488638 |
| C7orf43          | mRNA    | 0.435628399 | 0.008455459 |
| hsa_circ_0058641 | circRNA | 0.435545953 | 0.032607033 |
| SPRED2           | mRNA    | 0.434885093 | 0.001954751 |
| PICALM           | mRNA    | 0.434865378 | 0.012255854 |
| OPA3             | mRNA    | 0.434755971 | 0.00272915  |
| MAP3K13          | mRNA    | 0.434340868 | 0.006884817 |
| TRIQK            | mRNA    | 0.434196542 | 0.001522567 |
| hsa_circ_0009358 | circRNA | 0.434114036 | 0.032625784 |
| RPS6KC1          | mRNA    | 0.433906861 | 0.003520179 |
| JAM3             | mRNA    | 0.433698764 | 0.032629923 |
| MVP              | mRNA    | 0.433675782 | 0.045835589 |
| TNFRSF10B        | mRNA    | 0.433660646 | 0.001677625 |
| hsa_circ_0038982 | circRNA | 0.433383013 | 0.008545687 |
| LOC105373786     | lncRNA  | 0.432931054 | 0.005716891 |
| hsa_circ_0013691 | circRNA | 0.432807718 | 0.022231474 |
| ASPH             | mRNA    | 0.432429237 | 0.013906966 |
| EIF2AK1          | mRNA    | 0.432424337 | 0.022509946 |

|                  |         |             |             |
|------------------|---------|-------------|-------------|
| RAB5IF           | mRNA    | 0.432056584 | 0.004971314 |
| SORBS3           | mRNA    | 0.432014444 | 1.04E-04    |
| IFITM3           | mRNA    | 0.431891046 | 0.041797072 |
| NAPG             | mRNA    | 0.430676191 | 0.039931304 |
| SELENOK          | mRNA    | 0.430625054 | 0.005957666 |
| TRAM1            | mRNA    | 0.430607649 | 2.45E-04    |
| hsa_circ_0110689 | circRNA | 0.43023505  | 0.022652738 |
| hsa_circ_0131796 | circRNA | 0.430086928 | 0.037503325 |
| FNDC4            | mRNA    | 0.429787855 | 4.81E-04    |
| hsa_circ_0004733 | circRNA | 0.428872513 | 0.01852778  |
| DENND4B          | mRNA    | 0.428762489 | 0.009892516 |
| PECAM1           | mRNA    | 0.428721694 | 0.003012376 |
| ABLIM3           | mRNA    | 0.428454161 | 0.048638348 |
| ABCC10           | mRNA    | 0.428352207 | 8.95E-07    |
| TFG              | mRNA    | 0.427801784 | 0.001505002 |
| MNT              | mRNA    | 0.427472009 | 3.04E-04    |
| IARS             | mRNA    | 0.427433915 | 0.048551258 |
| PGRMC2           | mRNA    | 0.426540353 | 1.97E-04    |
| hsa_circ_0023925 | circRNA | 0.426491732 | 0.027848088 |
| hsa_circ_0059700 | circRNA | 0.426460334 | 0.032029771 |
| LOC105370792     | lncRNA  | 0.426143694 | 2.79E-05    |
| NFE2L2           | mRNA    | 0.425999208 | 0.006849072 |
| hsa_circ_0061347 | circRNA | 0.425998829 | 0.027373375 |
| TRIOBP           | mRNA    | 0.425940873 | 0.006008657 |
| hsa_circ_0061341 | circRNA | 0.425912246 | 0.01856113  |



|                  |         |             |             |
|------------------|---------|-------------|-------------|
| hsa_circ_0038980 | circRNA | 0.425847688 | 0.015797859 |
| hsa_circ_0089560 | circRNA | 0.424680947 | 0.00677559  |
| MIDN             | mRNA    | 0.424283032 | 0.030700405 |
| hsa_circ_0002590 | circRNA | 0.424231329 | 0.042689432 |
| FSCN1            | mRNA    | 0.424150158 | 0.023822355 |
| G6PC3            | mRNA    | 0.424098063 | 0.007912167 |
| hsa_circ_0061346 | circRNA | 0.423959026 | 0.021221587 |
| DIAPH1           | mRNA    | 0.423553319 | 1.33E-04    |
| PRPF3            | mRNA    | 0.423426483 | 2.21E-04    |
| hsa_circ_0061518 | circRNA | 0.423079948 | 0.041476854 |
| KTI12            | mRNA    | 0.423027044 | 0.022332447 |
| SLC37A3          | mRNA    | 0.422890469 | 0.023490021 |
| SMIM13           | mRNA    | 0.422856169 | 0.044911993 |
| NBL1             | mRNA    | 0.422467401 | 0.001645054 |
| CTTN             | mRNA    | 0.422356059 | 0.007918357 |
| SECISBP2         | mRNA    | 0.421242983 | 0.018082745 |
| ZDHHC9           | mRNA    | 0.421094985 | 2.63E-05    |
| PLPP5            | mRNA    | 0.420896918 | 0.022566656 |
| YIPF5            | mRNA    | 0.42087677  | 0.001153321 |
| LMAN1            | mRNA    | 0.420452788 | 0.009082399 |
| hsa_circ_0060035 | circRNA | 0.420208069 | 0.040594967 |
| EML1             | mRNA    | 0.419974053 | 4.50E-04    |
| PLEKHB2          | mRNA    | 0.419363612 | 0.022742139 |
| hsa_circ_0063686 | circRNA | 0.419181397 | 0.009390125 |
| hsa_circ_0018809 | circRNA | 0.418920419 | 0.028997077 |

|                  |         |             |             |
|------------------|---------|-------------|-------------|
| TMEM165          | mRNA    | 0.418902416 | 0.002125202 |
| TMEM127          | mRNA    | 0.4187886   | 8.83E-04    |
| LRRRC8A          | mRNA    | 0.418476705 | 1.59E-04    |
| ANKRD11          | mRNA    | 0.417978734 | 0.0026015   |
| EP400P1          | pseudo  | 0.417847633 | 0.00803242  |
| BMS1P20          | pseudo  | 0.417419797 | 0.009675607 |
| ILK              | mRNA    | 0.417335381 | 3.75E-04    |
| hsa_circ_0123982 | circRNA | 0.417214904 | 0.02395251  |
| hsa_circ_0104326 | circRNA | 0.416692982 | 0.026450321 |
| MPHOSPH10        | mRNA    | 0.416368159 | 4.25E-04    |
| SBDS             | mRNA    | 0.416304956 | 5.22E-06    |
| MORC4            | mRNA    | 0.416142114 | 5.60E-05    |
| MGAT4B           | mRNA    | 0.415593361 | 0.004642327 |
| PTPDC1           | mRNA    | 0.415441876 | 0.0098656   |
| ACOT9            | mRNA    | 0.415414637 | 3.24E-05    |
| hsa_circ_0059638 | circRNA | 0.41536731  | 0.025793774 |
| KCTD21           | mRNA    | 0.415305788 | 5.07E-05    |
| DEAF1            | mRNA    | 0.415206721 | 0.00595508  |
| CAPN10           | mRNA    | 0.415160162 | 0.025846037 |
| MGAT1            | mRNA    | 0.415012642 | 4.04E-10    |
| hsa_circ_0082150 | circRNA | 0.414908839 | 0.037941183 |
| NAGK             | mRNA    | 0.414667701 | 2.70E-05    |
| PIAS3            | mRNA    | 0.414415403 | 8.35E-05    |
| LONRF1           | mRNA    | 0.414219006 | 0.032536043 |
| SLC35F5          | mRNA    | 0.414193371 | 0.001454983 |

|                  |         |             |             |
|------------------|---------|-------------|-------------|
| APP              | mRNA    | 0.413657947 | 0.003704866 |
| CCDC9            | mRNA    | 0.413118434 | 5.95E-04    |
| DNASE1L1         | mRNA    | 0.412906795 | 0.012255854 |
| SEC22B           | mRNA    | 0.412539279 | 0.001790427 |
| TPM3             | mRNA    | 0.412494785 | 0.025461186 |
| hsa_circ_0008201 | circRNA | 0.41234406  | 0.031311138 |
| HGS              | mRNA    | 0.412139862 | 0.002555047 |
| hsa_circ_0059057 | circRNA | 0.411934995 | 0.005019517 |
| OSBP             | mRNA    | 0.411783524 | 4.31E-07    |
| NDUFA12          | mRNA    | 0.411613776 | 0.043527154 |
| hsa_circ_0099896 | circRNA | 0.411242624 | 0.036344003 |
| ITGB1BP1         | mRNA    | 0.410860807 | 1.53E-05    |
| hsa_circ_0104874 | circRNA | 0.410775771 | 0.007498735 |
| hsa_circ_0115726 | circRNA | 0.410619773 | 0.01102465  |
| RHOA             | mRNA    | 0.410491859 | 2.58E-05    |
| VPS25            | mRNA    | 0.409879702 | 0.004848848 |
| IQGAP1           | mRNA    | 0.409573879 | 9.24E-06    |
| hsa_circ_0089583 | circRNA | 0.409536031 | 0.049644284 |
| hsa_circ_0020625 | circRNA | 0.409195659 | 0.046358415 |
| MAPK7            | mRNA    | 0.409158767 | 8.76E-04    |
| KIF1BP           | mRNA    | 0.409041038 | 0.019017107 |
| FBXL12           | mRNA    | 0.40787212  | 0.0067565   |
| TRIM47           | mRNA    | 0.407037393 | 0.038964917 |
| LIG3             | mRNA    | 0.406767199 | 0.00863567  |
| NFKBIA           | mRNA    | 0.406471578 | 0.025846037 |

|                  |         |             |             |
|------------------|---------|-------------|-------------|
| FTSJ1            | mRNA    | 0.406359474 | 0.014817409 |
| CAMTA2           | mRNA    | 0.406246903 | 4.22E-06    |
| hsa_circ_0038976 | circRNA | 0.405098269 | 0.023841572 |
| ARNTL2           | mRNA    | 0.404944743 | 0.019942874 |
| TGFB1I1          | mRNA    | 0.404598164 | 0.015946832 |
| SYVN1            | mRNA    | 0.404224374 | 3.11E-04    |
| TMEM102          | mRNA    | 0.403960035 | 0.004771805 |
| MORN4            | mRNA    | 0.403326261 | 0.039888404 |
| BRPF1            | mRNA    | 0.403019875 | 0.005532865 |
| RTL6             | mRNA    | 0.402995922 | 0.00103846  |
| hsa_circ_0088735 | circRNA | 0.402790723 | 0.026728444 |
| WBP2             | mRNA    | 0.402604009 | 0.013761837 |
| NUMB             | mRNA    | 0.40229342  | 0.001994174 |
| hsa_circ_0061336 | circRNA | 0.402156012 | 0.032625784 |
| CAMK1            | mRNA    | 0.401649809 | 0.009608087 |
| hsa_circ_0068347 | circRNA | 0.401347942 | 0.046966717 |
| hsa_circ_0087224 | circRNA | 0.401189151 | 0.042694697 |
| EIF4G1           | mRNA    | 0.401122023 | 0.006025342 |
| ALG2             | mRNA    | 0.401098653 | 0.005737114 |
| MYO1C            | mRNA    | 0.401031947 | 0.048929647 |
| AGPAT4           | mRNA    | 0.400863124 | 0.003818834 |
| INPP1            | mRNA    | 0.400381262 | 0.014965972 |
| ARHGDI1          | mRNA    | 0.400124125 | 0.039687919 |
| TBC1D17          | mRNA    | 0.400103765 | 0.004888155 |
| C16orf58         | mRNA    | 0.399982647 | 0.005615439 |

|                  |         |             |             |
|------------------|---------|-------------|-------------|
| TP53I13          | mRNA    | 0.399765466 | 0.023862226 |
| RNPEPL1          | mRNA    | 0.399658853 | 8.18E-04    |
| hsa_circ_0128761 | circRNA | 0.399449903 | 0.039808867 |
| hsa_circ_0074887 | circRNA | 0.399392834 | 0.039825528 |
| TP53             | mRNA    | 0.399171744 | 0.008352324 |
| CHST7            | mRNA    | 0.398764371 | 0.016650356 |
| KIAA0232         | mRNA    | 0.398718517 | 0.035510131 |
| KIF3C            | mRNA    | 0.398550692 | 0.020169963 |
| hsa_circ_0036792 | circRNA | 0.397734298 | 0.025770124 |
| TSPO             | mRNA    | 0.397609937 | 3.00E-04    |
| TBC1D20          | mRNA    | 0.397486437 | 0.002635191 |
| hsa_circ_0036810 | circRNA | 0.397464825 | 0.010133565 |
| hsa_circ_0115727 | circRNA | 0.397176947 | 0.035675516 |
| CYFIP1           | mRNA    | 0.397019278 | 0.008196781 |
| HOXB6            | mRNA    | 0.396947949 | 0.012176762 |
| ENTPD4           | mRNA    | 0.396916913 | 0.001105621 |
| ZNF550           | mRNA    | 0.396780285 | 0.022439881 |
| CMAS             | mRNA    | 0.396669888 | 0.032231143 |
| SOX13            | mRNA    | 0.3965659   | 0.036648341 |
| TBC1D23          | mRNA    | 0.396286547 | 0.00146542  |
| hsa_circ_0003203 | circRNA | 0.395127986 | 0.049711721 |
| MIER2            | mRNA    | 0.394171483 | 0.028771981 |
| SLC38A10         | mRNA    | 0.393964402 | 0.007463972 |
| WDR92            | mRNA    | 0.393696551 | 0.028368635 |
| LZTR1            | mRNA    | 0.393477477 | 0.001463375 |

|                  |         |             |             |
|------------------|---------|-------------|-------------|
| ZCCHC9           | mRNA    | 0.393434101 | 0.002280972 |
| RNF13            | mRNA    | 0.392942234 | 0.013696402 |
| TWF2             | mRNA    | 0.392749355 | 0.02942904  |
| NR1H2            | mRNA    | 0.392694684 | 0.001651942 |
| SOGA1            | mRNA    | 0.392632439 | 0.008259817 |
| TPCN2            | mRNA    | 0.39171327  | 9.18E-04    |
| POR              | mRNA    | 0.391607939 | 0.011231437 |
| KIAA0100         | mRNA    | 0.391522479 | 0.003183918 |
| STK10            | mRNA    | 0.391369965 | 0.040527257 |
| ZNF672           | mRNA    | 0.391170487 | 0.021897048 |
| HGSNAT           | mRNA    | 0.390877265 | 0.003567727 |
| C9orf16          | mRNA    | 0.390649971 | 0.023566248 |
| hsa_circ_0016554 | circRNA | 0.390075129 | 0.028402708 |
| SEH1L            | mRNA    | 0.389146146 | 0.006195271 |
| TOR4A            | mRNA    | 0.388828553 | 0.025606964 |
| YIPF3            | mRNA    | 0.388813279 | 1.57E-04    |
| STT3A            | mRNA    | 0.388610282 | 0.003149735 |
| hsa_circ_0084756 | circRNA | 0.387737089 | 0.017171743 |
| PIP5K1C          | mRNA    | 0.387585032 | 0.042476974 |
| hsa_circ_0028517 | circRNA | 0.387409121 | 0.039204768 |
| MOB2             | mRNA    | 0.387069243 | 0.008005215 |
| ARHGAP23         | mRNA    | 0.38698754  | 1.67E-04    |
| PWP1             | mRNA    | 0.386901416 | 6.12E-04    |
| hsa_circ_0009004 | circRNA | 0.38656013  | 0.035652366 |
| PRKAA2           | mRNA    | 0.386311194 | 0.025368155 |

|                  |         |             |             |
|------------------|---------|-------------|-------------|
| ARMCX3           | mRNA    | 0.385940208 | 7.94E-05    |
| KCTD20           | mRNA    | 0.385811841 | 0.021657633 |
| hsa_circ_0026722 | circRNA | 0.385604741 | 0.034581602 |
| MYL12A           | mRNA    | 0.385591251 | 0.004289343 |
| DOCK9            | mRNA    | 0.385208636 | 0.006011417 |
| hsa_circ_0096190 | circRNA | 0.385017744 | 0.025765131 |
| MGRN1            | mRNA    | 0.384594385 | 7.35E-05    |
| RUBCN            | mRNA    | 0.384241977 | 5.57E-04    |
| hsa_circ_0093430 | circRNA | 0.383763916 | 0.031963096 |
| TMEM250          | mRNA    | 0.383338387 | 0.02704882  |
| TSPAN18          | mRNA    | 0.382735532 | 0.005031033 |
| DDX41            | mRNA    | 0.382500554 | 0.012915508 |
| AZIN1            | mRNA    | 0.382485435 | 0.013521093 |
| PPARA            | mRNA    | 0.382359658 | 0.033969552 |
| ITPKC            | mRNA    | 0.382279245 | 0.006781445 |
| TATDN2           | mRNA    | 0.382261653 | 0.037236186 |
| ELMO2            | mRNA    | 0.381650988 | 0.009946407 |
| RAB4B            | mRNA    | 0.381189549 | 0.007931052 |
| NAA10            | mRNA    | 0.381073575 | 0.017793374 |
| STYX             | mRNA    | 0.380924467 | 8.18E-04    |
| hsa_circ_0006869 | circRNA | 0.380260773 | 0.040164139 |
| hsa_circ_0104880 | circRNA | 0.380194444 | 0.046354475 |
| hsa_circ_0045948 | circRNA | 0.380161943 | 0.043504817 |
| USP36            | mRNA    | 0.379925741 | 0.016257868 |
| MICB             | mRNA    | 0.379898691 | 0.039555095 |

|                  |         |             |             |
|------------------|---------|-------------|-------------|
| GLYR1            | mRNA    | 0.379259056 | 0.001514026 |
| GOLPH3           | mRNA    | 0.378659953 | 6.74E-04    |
| SF3B2            | mRNA    | 0.37819768  | 0.008429503 |
| ARPC2            | mRNA    | 0.378147059 | 5.24E-05    |
| SRF              | mRNA    | 0.37788839  | 0.001331126 |
| ANAPC5           | mRNA    | 0.377105172 | 0.003957536 |
| CBARP            | mRNA    | 0.376739152 | 0.00737943  |
| FAM3C            | mRNA    | 0.376490707 | 0.01568587  |
| SACM1L           | mRNA    | 0.376315371 | 0.002444276 |
| ARL3             | mRNA    | 0.375861744 | 0.005535427 |
| hsa_circ_0137075 | circRNA | 0.375673554 | 0.027584665 |
| CCDC149          | mRNA    | 0.375237951 | 0.005094157 |
| RNF7             | mRNA    | 0.374344841 | 6.58E-04    |
| USP14            | mRNA    | 0.373916473 | 0.007854127 |
| RPN1             | mRNA    | 0.373837573 | 0.011505212 |
| ELOVL5           | mRNA    | 0.373428522 | 0.032084303 |
| BLOC1S4          | mRNA    | 0.373142107 | 0.012053019 |
| VASP             | mRNA    | 0.37298794  | 0.003927401 |
| MOV10            | mRNA    | 0.372810932 | 0.014049446 |
| RAB5B            | mRNA    | 0.372657097 | 1.10E-06    |
| PKNOX1           | mRNA    | 0.371998067 | 0.011514055 |
| hsa_circ_0061342 | circRNA | 0.371582244 | 0.034890377 |
| JTB              | mRNA    | 0.371436343 | 0.019873844 |
| TSPAN9           | mRNA    | 0.369792351 | 0.003638431 |
| RRP36            | mRNA    | 0.369633019 | 0.003710673 |



|                  |         |             |             |
|------------------|---------|-------------|-------------|
| TMEM63B          | mRNA    | 0.369377433 | 0.035960441 |
| LZTFL1           | mRNA    | 0.369293347 | 7.83E-04    |
| RP2              | mRNA    | 0.369290492 | 0.019370909 |
| G3BP1            | mRNA    | 0.369095773 | 0.044336582 |
| SUCO             | mRNA    | 0.368907849 | 0.009568072 |
| hsa_circ_0012869 | circRNA | 0.368752135 | 0.027175326 |
| ECE1             | mRNA    | 0.368627079 | 8.81E-04    |
| ASCC3            | mRNA    | 0.368306393 | 0.034688307 |
| JARID2           | mRNA    | 0.368147367 | 0.002161888 |
| CXorf40B         | mRNA    | 0.367887166 | 0.009022441 |
| CRYBG3           | mRNA    | 0.367618169 | 0.006676849 |
| SNHG12           | lncRNA  | 0.367499663 | 0.03345367  |
| FAM129B          | mRNA    | 0.367420901 | 0.014754949 |
| hsa_circ_0069779 | circRNA | 0.367267107 | 0.039723101 |
| JAK1             | mRNA    | 0.366822243 | 0.001404465 |
| ATP5MD           | mRNA    | 0.366206739 | 0.01531839  |
| hsa_circ_0000651 | circRNA | 0.364765728 | 0.031230989 |
| SAMD4B           | mRNA    | 0.364296621 | 0.04025715  |
| ZNF276           | mRNA    | 0.364234722 | 0.024268502 |
| IRF1             | mRNA    | 0.36356387  | 0.005615439 |
| GSTP1            | mRNA    | 0.363467439 | 0.022804419 |
| EIF1AD           | mRNA    | 0.363450796 | 0.024071113 |
| SDHAF2           | mRNA    | 0.362956269 | 0.002596489 |
| FAR1             | mRNA    | 0.36276737  | 4.19E-04    |
| TTC19            | mRNA    | 0.362470866 | 0.001678114 |

|                  |         |             |             |
|------------------|---------|-------------|-------------|
| YME1L1           | mRNA    | 0.362264377 | 7.13E-04    |
| hsa_circ_0051254 | circRNA | 0.361967851 | 0.023387812 |
| C1orf174         | mRNA    | 0.361570925 | 0.045644608 |
| IFNGR2           | mRNA    | 0.361130361 | 0.012504702 |
| RAB2A            | mRNA    | 0.361033415 | 0.007758782 |
| TPRN             | mRNA    | 0.360621695 | 0.032581072 |
| TXNDC9           | mRNA    | 0.360005059 | 0.037341113 |
| BAG5             | mRNA    | 0.359487264 | 6.85E-06    |
| HDAC6            | mRNA    | 0.358079674 | 0.010434201 |
| ALKBH5           | mRNA    | 0.357146464 | 0.001280235 |
| hsa_circ_0051251 | circRNA | 0.356774417 | 0.038389557 |
| hsa_circ_0065344 | circRNA | 0.356546344 | 0.045502678 |
| EIF4E2           | mRNA    | 0.355788841 | 0.003965189 |
| ZNF865           | mRNA    | 0.3552278   | 0.004226613 |
| ASB13            | mRNA    | 0.35515898  | 0.019942874 |
| MDC1             | mRNA    | 0.354819439 | 6.61E-04    |
| REEP5            | mRNA    | 0.354442671 | 0.001784145 |
| ITCH             | mRNA    | 0.354167763 | 1.60E-04    |
| PIK3CB           | mRNA    | 0.353550696 | 0.017401456 |
| OIP5-AS1         | lncRNA  | 0.352440499 | 8.86E-04    |
| ADIPOR1          | mRNA    | 0.352266151 | 0.015796028 |
| ARL8A            | mRNA    | 0.351472823 | 0.015431599 |
| hsa_circ_0009348 | circRNA | 0.350948103 | 0.040165538 |
| KIF1C            | mRNA    | 0.35070681  | 0.006641705 |
| KLC1             | mRNA    | 0.350556004 | 0.01086994  |

|                  |         |             |             |
|------------------|---------|-------------|-------------|
| KIF3B            | mRNA    | 0.350478645 | 0.030826699 |
| ELOF1            | mRNA    | 0.349804586 | 0.01234666  |
| TRIM11           | mRNA    | 0.349754406 | 0.035960441 |
| DMWD             | mRNA    | 0.34905364  | 0.002190503 |
| CAST             | mRNA    | 0.348741994 | 0.011065263 |
| SAYS1            | mRNA    | 0.348686936 | 0.006272016 |
| hsa_circ_0036799 | circRNA | 0.34822125  | 0.024732774 |
| NSUN4            | mRNA    | 0.348195356 | 0.039706352 |
| SETD7            | mRNA    | 0.347778331 | 0.014894327 |
| NRBP1            | mRNA    | 0.347762464 | 0.007674985 |
| STX5             | mRNA    | 0.346708147 | 8.81E-05    |
| RTL8B            | mRNA    | 0.346495587 | 0.03398006  |
| MRPL24           | mRNA    | 0.346088637 | 0.034043983 |
| PTPRA            | mRNA    | 0.34485548  | 0.00145404  |
| FAM76A           | mRNA    | 0.344456971 | 0.023085156 |
| YIPF6            | mRNA    | 0.344035537 | 0.011764307 |
| GOLGA4           | mRNA    | 0.343927463 | 9.21E-04    |
| DXO              | mRNA    | 0.343425955 | 0.048241245 |
| hsa_circ_0082132 | circRNA | 0.343323007 | 0.043450978 |
| PUSL1            | mRNA    | 0.342865749 | 0.043946723 |
| LPIN2            | mRNA    | 0.342564747 | 0.009022441 |
| COPB1            | mRNA    | 0.342401489 | 6.33E-04    |
| LTN1             | mRNA    | 0.341735227 | 0.026040743 |
| INTS3            | mRNA    | 0.34141476  | 0.001379534 |
| NADSYN1          | mRNA    | 0.340575547 | 0.010594175 |

|                  |         |             |             |
|------------------|---------|-------------|-------------|
| RTL8A            | mRNA    | 0.340502754 | 0.036320096 |
| hsa_circ_0009353 | circRNA | 0.3402662   | 0.025604732 |
| DNAJC1           | mRNA    | 0.339760498 | 9.73E-04    |
| PRDX1            | mRNA    | 0.339456478 | 0.022933752 |
| FAM8A1           | mRNA    | 0.339136165 | 0.010578263 |
| ARHGEF7          | mRNA    | 0.33896887  | 0.007829821 |
| GZF1             | mRNA    | 0.338819959 | 0.002736684 |
| LRP11            | mRNA    | 0.338706665 | 0.027801143 |
| SRRT             | mRNA    | 0.338162845 | 0.043725503 |
| FBXW5            | mRNA    | 0.337880703 | 0.010862061 |
| MAP7D1           | mRNA    | 0.336317536 | 0.042925898 |
| ZCCHC2           | mRNA    | 0.334996091 | 0.001523283 |
| RIOK1            | mRNA    | 0.334540684 | 0.004877625 |
| C14orf119        | mRNA    | 0.334442302 | 8.69E-04    |
| RAB3GAP2         | mRNA    | 0.334187538 | 0.00131907  |
| ARF3             | mRNA    | 0.33406348  | 0.008566287 |
| ZBTB11           | mRNA    | 0.334042246 | 0.035808405 |
| SCAMP3           | mRNA    | 0.333721141 | 0.015435911 |
| FERMT2           | mRNA    | 0.33364073  | 0.001419054 |
| NECAP2           | mRNA    | 0.332821559 | 9.91E-05    |
| AUP1             | mRNA    | 0.332788878 | 0.033623355 |
| NDUFA6           | mRNA    | 0.332699734 | 0.048405168 |
| ARHGAP26         | mRNA    | 0.332692621 | 0.039236443 |
| TM9SF1           | mRNA    | 0.332296252 | 2.88E-04    |
| SND1             | mRNA    | 0.331601878 | 9.68E-04    |

|                  |         |             |             |
|------------------|---------|-------------|-------------|
| TRIM52           | mRNA    | 0.331286142 | 0.018137633 |
| ZSCAN22          | mRNA    | 0.330796547 | 0.043102269 |
| hsa_circ_0045947 | circRNA | 0.330547818 | 0.04720965  |
| REXO2            | mRNA    | 0.330414254 | 0.005077536 |
| MBNL1            | mRNA    | 0.329870357 | 0.002360524 |
| MON2             | mRNA    | 0.329195676 | 0.006010948 |
| TMPPE            | mRNA    | 0.329097206 | 0.04771321  |
| SLC30A4          | mRNA    | 0.328642038 | 0.007527003 |
| KLF7             | mRNA    | 0.328627003 | 0.027299334 |
| ECSCR            | mRNA    | 0.327766172 | 0.030120489 |
| BMS1             | mRNA    | 0.32773598  | 0.021549386 |
| UBFD1            | mRNA    | 0.327614469 | 0.005013664 |
| GAS6             | mRNA    | 0.327065244 | 0.048475951 |
| UBAP2            | mRNA    | 0.326613541 | 0.03885033  |
| hsa_circ_0010503 | circRNA | 0.325065895 | 0.0405317   |
| TADA2B           | mRNA    | 0.324094582 | 0.039421244 |
| MAPKAPK2         | mRNA    | 0.323940045 | 0.005936198 |
| ATG9A            | mRNA    | 0.3233999   | 7.96E-05    |
| POFUT2           | mRNA    | 0.323337154 | 0.048880481 |
| GOSR1            | mRNA    | 0.323043639 | 0.011166975 |
| PCMT1            | mRNA    | 0.32242072  | 0.035205967 |
| ARL2BP           | mRNA    | 0.320640135 | 0.009118387 |
| SKAP2            | mRNA    | 0.32031079  | 0.010862061 |
| CCNYL1           | mRNA    | 0.320232744 | 0.040195738 |
| CEP104           | mRNA    | 0.319908906 | 0.045476539 |

|                  |         |             |             |
|------------------|---------|-------------|-------------|
| ORMDL2           | mRNA    | 0.319320454 | 0.034720285 |
| TOM1L2           | mRNA    | 0.319043392 | 5.82E-05    |
| EPRS             | mRNA    | 0.318305444 | 0.011338423 |
| hsa_circ_0119142 | circRNA | 0.318126271 | 0.042415816 |
| HPS6             | mRNA    | 0.317753782 | 0.026856889 |
| VPS4A            | mRNA    | 0.316466126 | 0.003487821 |
| RAVER1           | mRNA    | 0.316386162 | 0.043504369 |
| DUSP14           | mRNA    | 0.315895412 | 0.036705654 |
| STARD7-AS1       | lncRNA  | 0.314911094 | 0.022258826 |
| RER1             | mRNA    | 0.314867678 | 0.011175941 |
| TRAPPC10         | mRNA    | 0.313853011 | 0.042925898 |
| NRBF2            | mRNA    | 0.313604585 | 0.018209005 |
| PJA1             | mRNA    | 0.313536088 | 0.002196855 |
| ZDHHC5           | mRNA    | 0.313023159 | 0.005663409 |
| ARL6IP6          | mRNA    | 0.313019436 | 0.010524061 |
| INTS2            | mRNA    | 0.313002015 | 0.003967194 |
| USP35            | mRNA    | 0.311229386 | 0.030029222 |
| LRFN3            | mRNA    | 0.311196028 | 0.007420802 |
| FEM1C            | mRNA    | 0.309890412 | 0.049022729 |
| HEATR6           | mRNA    | 0.30966655  | 0.025527781 |
| NDST2            | mRNA    | 0.308403512 | 5.48E-04    |
| ATXN7            | mRNA    | 0.308364057 | 0.026053172 |
| AP1M1            | mRNA    | 0.308360772 | 0.049805724 |
| GNB1             | mRNA    | 0.308123666 | 0.004178399 |
| TNK2             | mRNA    | 0.308079071 | 0.02126841  |

|           |        |             |             |
|-----------|--------|-------------|-------------|
| JKAMP     | mRNA   | 0.307965369 | 0.023798652 |
| NME6      | mRNA   | 0.306822069 | 0.02484857  |
| FAM219B   | mRNA   | 0.306524357 | 0.01297433  |
| LOC648987 | lncRNA | 0.305691209 | 0.023173159 |
| LPGAT1    | mRNA   | 0.304910003 | 0.008650566 |
| SEC22C    | mRNA   | 0.304518385 | 0.001514026 |
| CC2D1B    | mRNA   | 0.3044319   | 0.001880193 |
| FUT4      | mRNA   | 0.304365949 | 0.003314318 |
| SS18      | mRNA   | 0.30425556  | 0.002991312 |
| DDX1      | mRNA   | 0.304062276 | 0.032231143 |
| RNF187    | mRNA   | 0.302818012 | 0.017934969 |
| EIF5B     | mRNA   | 0.302786796 | 0.021024861 |
| RAB11FIP5 | mRNA   | 0.302344456 | 0.003250328 |
| SUPT5H    | mRNA   | 0.302324994 | 2.40E-04    |
| KIF1B     | mRNA   | 0.301324573 | 0.025039079 |
| SETD3     | mRNA   | 0.301236539 | 0.012098677 |
| SLC35B3   | mRNA   | 0.299948436 | 0.017190381 |
| SOX7      | mRNA   | 0.299773474 | 0.023745296 |
| TDRD7     | mRNA   | 0.299603325 | 0.011065263 |
| SYNGR2    | mRNA   | 0.299300622 | 0.043778336 |
| ASCC2     | mRNA   | 0.298941387 | 0.034531151 |
| TRIM21    | mRNA   | 0.298895893 | 0.015092764 |
| DNAJC5    | mRNA   | 0.298309497 | 0.017664578 |
| EIF2B5    | mRNA   | 0.297858187 | 0.020870324 |
| SEPT2     | mRNA   | 0.297092673 | 0.033390933 |

|          |      |             |             |
|----------|------|-------------|-------------|
| PI4K2A   | mRNA | 0.296559005 | 0.033401859 |
| S1PR1    | mRNA | 0.295063813 | 0.001795781 |
| SHC1     | mRNA | 0.294667703 | 4.62E-07    |
| UTP14C   | mRNA | 0.293948765 | 0.007718722 |
| POMK     | mRNA | 0.293829953 | 0.048301201 |
| ANO10    | mRNA | 0.293020194 | 0.008045418 |
| RFX1     | mRNA | 0.292915077 | 0.018824683 |
| MIA2     | mRNA | 0.29262026  | 0.039254245 |
| ZBTB4    | mRNA | 0.292100888 | 0.021897048 |
| EXOC8    | mRNA | 0.291602193 | 0.045716519 |
| PSMD1    | mRNA | 0.290268476 | 0.045702171 |
| EPM2AIP1 | mRNA | 0.289924934 | 0.048846429 |
| HERPUD2  | mRNA | 0.289881235 | 0.00127169  |
| RNF216   | mRNA | 0.289856995 | 0.001208545 |
| TIMP2    | mRNA | 0.289604988 | 0.020713407 |
| CDC37    | mRNA | 0.289526263 | 0.037300508 |
| FBXO34   | mRNA | 0.289020907 | 0.013362755 |
| PKD1     | mRNA | 0.288590769 | 0.013634312 |
| MORF4L1  | mRNA | 0.288575743 | 0.004249767 |
| ST3GAL2  | mRNA | 0.288497569 | 0.002485598 |
| INO80    | mRNA | 0.287487813 | 0.019310486 |
| GNPDA2   | mRNA | 0.287129195 | 0.04048403  |
| PSMA5    | mRNA | 0.286151433 | 0.032250579 |
| DYNLL1   | mRNA | 0.285502366 | 0.027299334 |
| R3HDM4   | mRNA | 0.285166559 | 0.006879904 |



|           |      |             |             |
|-----------|------|-------------|-------------|
| BDP1      | mRNA | 0.283946362 | 0.017385218 |
| TMEM8A    | mRNA | 0.28381141  | 0.016961857 |
| PDPK1     | mRNA | 0.283632269 | 0.009860757 |
| ZNF333    | mRNA | 0.282443179 | 0.048209966 |
| UBE2O     | mRNA | 0.281662063 | 0.017860472 |
| COPZ1     | mRNA | 0.281193207 | 0.01599232  |
| YEATS2    | mRNA | 0.280909405 | 0.0434775   |
| F8A1      | mRNA | 0.280555927 | 0.038630503 |
| NAA35     | mRNA | 0.279437282 | 0.001478237 |
| PITPNA    | mRNA | 0.278915722 | 0.020303228 |
| PIP4P1    | mRNA | 0.278231763 | 0.012406364 |
| ATL3      | mRNA | 0.278161893 | 4.87E-04    |
| DDX5      | mRNA | 0.276533828 | 0.017101906 |
| SLTM      | mRNA | 0.276257857 | 8.39E-04    |
| TRIP4     | mRNA | 0.276153756 | 0.022118891 |
| MKRN2     | mRNA | 0.274983934 | 0.047529758 |
| EIF4ENIF1 | mRNA | 0.273340192 | 0.001377555 |
| RIPK1     | mRNA | 0.273301529 | 6.18E-04    |
| SLC35A4   | mRNA | 0.272218165 | 0.01318047  |
| TUT7      | mRNA | 0.271379359 | 0.007625956 |
| ZNF512    | mRNA | 0.270894347 | 0.013112261 |
| STAT3     | mRNA | 0.270351948 | 0.026856889 |
| PRKAB1    | mRNA | 0.269934497 | 0.017451213 |
| ZCCHC8    | mRNA | 0.269564833 | 0.01747924  |
| PIKFYVE   | mRNA | 0.268148505 | 0.035808405 |

|          |      |             |             |
|----------|------|-------------|-------------|
| RAB40C   | mRNA | 0.267216416 | 0.018136338 |
| NCOA5    | mRNA | 0.267075557 | 0.049014973 |
| SEC24C   | mRNA | 0.266204517 | 0.00756836  |
| LYPLA2   | mRNA | 0.266001353 | 0.015641556 |
| TPRG1L   | mRNA | 0.264035941 | 0.017853845 |
| FYN      | mRNA | 0.263697254 | 0.021772846 |
| MFNG     | mRNA | 0.262011055 | 0.01086994  |
| EMC3     | mRNA | 0.261906978 | 0.033981929 |
| PTP4A2   | mRNA | 0.261020494 | 0.039635591 |
| NT5DC3   | mRNA | 0.260832145 | 0.049410122 |
| STIMATE  | mRNA | 0.2585833   | 0.042925898 |
| TXLNA    | mRNA | 0.258576558 | 0.016616606 |
| SNIP1    | mRNA | 0.258177767 | 0.012843338 |
| PPP1R15B | mRNA | 0.258148608 | 0.043946723 |
| ARPC4    | mRNA | 0.257178408 | 0.004888155 |
| CHMP7    | mRNA | 0.254980677 | 0.025562983 |
| ASB6     | mRNA | 0.254832651 | 0.032015113 |
| ELOA     | mRNA | 0.254287673 | 0.049143042 |
| ADCY6    | mRNA | 0.253517748 | 0.025715172 |
| PPIC     | mRNA | 0.253050329 | 0.012597747 |
| KAT5     | mRNA | 0.252975122 | 0.017027635 |
| SH3GLB1  | mRNA | 0.250113946 | 0.003937194 |
| PPP1R12C | mRNA | 0.249970399 | 0.021455513 |
| NFKB1    | mRNA | 0.249152655 | 0.018812867 |
| CD47     | mRNA | 0.247949627 | 0.029552701 |

|         |      |             |             |
|---------|------|-------------|-------------|
| INTS5   | mRNA | 0.247597593 | 0.034470624 |
| TERF2IP | mRNA | 0.24708928  | 0.012705118 |
| UBQLN2  | mRNA | 0.246751763 | 0.047505822 |
| RETSAT  | mRNA | 0.246029304 | 0.007715758 |
| TMEM259 | mRNA | 0.245226758 | 0.023790053 |
| BCAP31  | mRNA | 0.245021451 | 0.016183039 |
| TECPR2  | mRNA | 0.245006494 | 0.001797983 |
| KRIT1   | mRNA | 0.244775473 | 0.011793361 |
| GNB2    | mRNA | 0.24274016  | 0.031149809 |
| AKAP9   | mRNA | 0.240942261 | 0.029136273 |
| ZDHHC24 | mRNA | 0.240592345 | 0.024918378 |
| MFSD10  | mRNA | 0.239513179 | 0.027277792 |
| YWHAB   | mRNA | 0.239151235 | 0.034446758 |
| FKBP15  | mRNA | 0.237276804 | 0.008103111 |
| BMP1    | mRNA | 0.236320643 | 0.008260595 |
| ATG13   | mRNA | 0.235234746 | 0.036173066 |
| ATP2C1  | mRNA | 0.234818286 | 0.037673905 |
| WDR47   | mRNA | 0.233660172 | 0.012646045 |
| SLC39A9 | mRNA | 0.232916941 | 0.019481225 |
| PLOD3   | mRNA | 0.230649189 | 0.018241285 |
| FYCO1   | mRNA | 0.225130608 | 0.039753254 |
| AIDA    | mRNA | 0.223741666 | 0.002498377 |
| CDS2    | mRNA | 0.223653798 | 0.040202968 |
| MIA3    | mRNA | 0.222522296 | 0.016741485 |
| MOB3A   | mRNA | 0.221524843 | 0.049837238 |

|         |      |              |             |
|---------|------|--------------|-------------|
| PI4KA   | mRNA | 0.220097173  | 0.001984509 |
| NDFIP1  | mRNA | 0.21668484   | 0.017616393 |
| PTPN9   | mRNA | 0.216611796  | 0.04579236  |
| SRP68   | mRNA | 0.216517724  | 0.029581    |
| GAK     | mRNA | 0.214102951  | 0.036705654 |
| NUB1    | mRNA | 0.214039916  | 0.04262732  |
| ANKFY1  | mRNA | 0.209871381  | 0.048178219 |
| FKBP1A  | mRNA | 0.209360131  | 0.02588482  |
| CERS5   | mRNA | 0.207732003  | 0.015641556 |
| TOB2    | mRNA | 0.20009055   | 0.022668399 |
| BAHD1   | mRNA | 0.192819155  | 0.031149809 |
| USO1    | mRNA | 0.192807212  | 0.020536259 |
| HSF1    | mRNA | 0.192090677  | 0.032015113 |
| RRAGA   | mRNA | 0.189535937  | 0.019440905 |
| EGLN2   | mRNA | 0.179359564  | 0.035705778 |
| TMBIM6  | mRNA | 0.166595406  | 0.04806737  |
| LSM14A  | mRNA | -0.185152492 | 0.032164417 |
| TNRC6A  | mRNA | -0.18865914  | 0.027894648 |
| RBBP6   | mRNA | -0.194824064 | 0.040969854 |
| TAB2    | mRNA | -0.19848636  | 0.012842252 |
| USP22   | mRNA | -0.199104331 | 0.037673905 |
| SCD5    | mRNA | -0.218071831 | 0.041441764 |
| RABGAP1 | mRNA | -0.221227021 | 0.041399953 |
| BCL9    | mRNA | -0.221751181 | 0.039095151 |
| RBM22   | mRNA | -0.222025917 | 0.031034108 |

|          |      |              |             |
|----------|------|--------------|-------------|
| MATR3    | mRNA | -0.227034376 | 0.030489287 |
| USP28    | mRNA | -0.229074487 | 0.044056761 |
| TRIM37   | mRNA | -0.229815158 | 0.028319775 |
| RBBP4    | mRNA | -0.231649032 | 0.009125844 |
| ARHGAP35 | mRNA | -0.231689485 | 0.032864938 |
| PPP6C    | mRNA | -0.234898438 | 0.005135931 |
| RBM4     | mRNA | -0.235196209 | 0.030988271 |
| KPNB1    | mRNA | -0.235288649 | 0.015863461 |
| ANKRD26  | mRNA | -0.237014826 | 0.026407597 |
| MAN2B1   | mRNA | -0.237905844 | 0.03793949  |
| SNX2     | mRNA | -0.238649429 | 0.042726803 |
| EIF5     | mRNA | -0.240642939 | 0.010012053 |
| METAP2   | mRNA | -0.241654373 | 0.037246522 |
| NAB1     | mRNA | -0.242925762 | 0.03421771  |
| RWDD2B   | mRNA | -0.243079022 | 0.032390582 |
| SPATA20  | mRNA | -0.248132821 | 0.037948888 |
| CAMK2D   | mRNA | -0.248953399 | 0.001997371 |
| LMTK2    | mRNA | -0.249429145 | 0.005615439 |
| NOC3L    | mRNA | -0.249748938 | 0.049915677 |
| EML4     | mRNA | -0.255368234 | 0.007014026 |
| ANKRD13A | mRNA | -0.256187796 | 0.046096343 |
| PHLPP1   | mRNA | -0.256808579 | 0.028396991 |
| HKR1     | mRNA | -0.258128278 | 0.03958397  |
| TRAF7    | mRNA | -0.258464834 | 0.010619546 |
| STAG2    | mRNA | -0.25920102  | 0.018524652 |

|          |      |              |             |
|----------|------|--------------|-------------|
| SMG6     | mRNA | -0.259894914 | 0.012098677 |
| NDUFB5   | mRNA | -0.259936406 | 0.025849556 |
| RANBP10  | mRNA | -0.260157096 | 0.042927617 |
| TRAPPC2L | mRNA | -0.260164927 | 0.036678157 |
| DYRK1A   | mRNA | -0.260694276 | 0.006372463 |
| ZNF555   | mRNA | -0.260731091 | 0.041189929 |
| SLC25A3  | mRNA | -0.262778184 | 0.040001746 |
| ZNF45    | mRNA | -0.262896742 | 0.012255854 |
| PRUNE1   | mRNA | -0.2652075   | 0.044080902 |
| GTF2H1   | mRNA | -0.266073931 | 0.010261011 |
| DDX17    | mRNA | -0.266511264 | 0.025715172 |
| RAP2C    | mRNA | -0.266987404 | 0.049014973 |
| NAGLU    | mRNA | -0.267450469 | 0.041072208 |
| TNPO2    | mRNA | -0.267873093 | 0.032320106 |
| ARHGAP29 | mRNA | -0.268619661 | 0.00803242  |
| TTC21B   | mRNA | -0.269529771 | 0.040196984 |
| ZMYM2    | mRNA | -0.269765425 | 0.038613005 |
| GPR137B  | mRNA | -0.272250192 | 0.03072471  |
| SPG21    | mRNA | -0.279759662 | 0.015930839 |
| FAM53C   | mRNA | -0.280290733 | 0.008190591 |
| EIF3D    | mRNA | -0.281220381 | 0.020074288 |
| DEDD     | mRNA | -0.281979607 | 0.003500434 |
| ZZZ3     | mRNA | -0.282751762 | 0.023801502 |
| MAST3    | mRNA | -0.284407034 | 0.046373055 |
| RNF146   | mRNA | -0.284921871 | 0.007524731 |

|         |      |              |             |
|---------|------|--------------|-------------|
| TIA1    | mRNA | -0.28604664  | 0.011917715 |
| CNOT7   | mRNA | -0.286151649 | 0.006589525 |
| AZI2    | mRNA | -0.286296087 | 0.038737392 |
| PCBP2   | mRNA | -0.287261055 | 0.004830933 |
| HIBCH   | mRNA | -0.28784359  | 0.031353336 |
| RARA    | mRNA | -0.28795556  | 0.027168397 |
| NSD3    | mRNA | -0.288371593 | 6.50E-04    |
| BTBD3   | mRNA | -0.289717787 | 0.001790427 |
| EDEM2   | mRNA | -0.290609964 | 0.011231683 |
| STK38L  | mRNA | -0.291456483 | 0.016497553 |
| TOPORS  | mRNA | -0.292558795 | 0.006095514 |
| RNF121  | mRNA | -0.293850267 | 0.035096115 |
| BRWD3   | mRNA | -0.293994146 | 0.001655474 |
| TEAD2   | mRNA | -0.294790436 | 0.02519928  |
| R3HCC1L | mRNA | -0.294843107 | 0.015250204 |
| NEK7    | mRNA | -0.29550777  | 0.014367972 |
| REXO4   | mRNA | -0.29620598  | 0.034468832 |
| ZNF316  | mRNA | -0.297257464 | 0.016924743 |
| MED28   | mRNA | -0.297353366 | 0.02811267  |
| NT5DC1  | mRNA | -0.299581116 | 0.002649805 |
| ATG2A   | mRNA | -0.299622762 | 0.024166305 |
| FGD1    | mRNA | -0.301109798 | 0.037062286 |
| GBA     | mRNA | -0.301755453 | 0.001330618 |
| EGLN1   | mRNA | -0.302068089 | 0.013068315 |
| ZNF282  | mRNA | -0.305725586 | 0.002748723 |

|                  |         |              |             |
|------------------|---------|--------------|-------------|
| ADH5             | mRNA    | -0.306609164 | 0.00153345  |
| MLYCD            | mRNA    | -0.30708577  | 0.015048362 |
| LDLRAD3          | mRNA    | -0.307158592 | 0.038908155 |
| CHD4             | mRNA    | -0.30774744  | 0.004526142 |
| PCNX1            | mRNA    | -0.308582378 | 0.009027893 |
| EIF3L            | mRNA    | -0.309315451 | 2.93E-04    |
| GTF2IP1          | pseudo  | -0.309502695 | 4.14E-04    |
| PEX19            | mRNA    | -0.310068291 | 6.48E-04    |
| CCNC             | mRNA    | -0.310236223 | 0.036868119 |
| FAM171B          | mRNA    | -0.31049502  | 0.021619357 |
| COBLL1           | mRNA    | -0.31108381  | 0.005937419 |
| CLCN7            | mRNA    | -0.313047083 | 0.017073995 |
| ZFAND4           | mRNA    | -0.314983176 | 0.022742139 |
| HSDL1            | mRNA    | -0.315624495 | 0.002300898 |
| TEAD1            | mRNA    | -0.315841617 | 0.032872429 |
| SPOP             | mRNA    | -0.316551336 | 0.029003431 |
| UBL7             | mRNA    | -0.317396686 | 0.011881838 |
| CCT4             | mRNA    | -0.317734158 | 0.010862061 |
| DHX40            | mRNA    | -0.317997873 | 0.013098732 |
| RPL6             | mRNA    | -0.318683878 | 0.003672694 |
| hsa_circ_0026703 | circRNA | -0.319002664 | 0.041052623 |
| PHF20            | mRNA    | -0.320824747 | 1.95E-04    |
| MRPS24           | mRNA    | -0.320921769 | 0.026922775 |
| CHKA             | mRNA    | -0.321433965 | 0.032231143 |
| ATF7IP2          | mRNA    | -0.321562953 | 0.029000407 |



|                  |         |              |             |
|------------------|---------|--------------|-------------|
| ERLIN1           | mRNA    | -0.32222603  | 0.012685301 |
| KCTD1            | mRNA    | -0.322273603 | 0.039236443 |
| HEXB             | mRNA    | -0.323763035 | 3.49E-04    |
| GLB1             | mRNA    | -0.326796847 | 6.49E-04    |
| COPRS            | mRNA    | -0.327048066 | 0.023866442 |
| CBX1             | mRNA    | -0.327133893 | 0.014936459 |
| CDAN1            | mRNA    | -0.327270338 | 0.006218684 |
| GRN              | mRNA    | -0.327775584 | 0.012798112 |
| TNFAIP8L1        | mRNA    | -0.328794872 | 0.022854663 |
| ZNF426           | mRNA    | -0.329061251 | 0.037673905 |
| CSDE1            | mRNA    | -0.32919751  | 4.33E-04    |
| CIAO2A           | mRNA    | -0.329811902 | 0.018867031 |
| TAL1             | mRNA    | -0.330017268 | 0.01542439  |
| PTCD2            | mRNA    | -0.330723677 | 0.012200182 |
| ZNF776           | mRNA    | -0.331462434 | 0.006738646 |
| SH3BP4           | mRNA    | -0.331730424 | 2.21E-04    |
| hsa_circ_0063260 | circRNA | -0.332688887 | 0.028170626 |
| HEXA             | mRNA    | -0.333712379 | 0.003614366 |
| hsa_circ_0063262 | circRNA | -0.333769728 | 0.0365149   |
| ZNF189           | mRNA    | -0.334624043 | 0.042680758 |
| HIF1A            | mRNA    | -0.336367641 | 0.004838512 |
| IPO5             | mRNA    | -0.336765935 | 0.032939267 |
| EHMT2            | mRNA    | -0.337274568 | 0.014181042 |
| PBX2             | mRNA    | -0.338578111 | 0.049443301 |
| FBXO10           | mRNA    | -0.338642481 | 9.81E-04    |

|                  |         |              |             |
|------------------|---------|--------------|-------------|
| HDAC7            | mRNA    | -0.339403533 | 0.001834247 |
| PCCA             | mRNA    | -0.340135462 | 0.023802549 |
| SUZ12P1          | pseudo  | -0.340934743 | 0.026462337 |
| HADHB            | mRNA    | -0.341166505 | 0.016048101 |
| SNHG14           | lncRNA  | -0.341700918 | 0.013362755 |
| FOPNL            | mRNA    | -0.341873369 | 0.001623231 |
| SNRNP48          | mRNA    | -0.342176209 | 0.005916587 |
| ZDHHC2           | mRNA    | -0.343502957 | 0.001025128 |
| NSD1             | mRNA    | -0.343755054 | 0.010594175 |
| ATP6V1A          | mRNA    | -0.344318257 | 0.01189445  |
| PAM              | mRNA    | -0.345219093 | 0.012255854 |
| CDK14            | mRNA    | -0.345495635 | 0.048260462 |
| ACAA2            | mRNA    | -0.346300847 | 0.006905957 |
| PPP1CC           | mRNA    | -0.346529289 | 0.019873844 |
| TMC6             | mRNA    | -0.347178124 | 0.014965972 |
| PLEKHG2          | mRNA    | -0.347481501 | 0.013470061 |
| hsa_circ_0074647 | circRNA | -0.348277649 | 0.036212781 |
| HOXD8            | mRNA    | -0.348426513 | 0.017101906 |
| hsa_circ_0026704 | circRNA | -0.348478805 | 0.036909429 |
| OXA1L            | mRNA    | -0.349429733 | 1.88E-04    |
| GALNS            | mRNA    | -0.349434907 | 0.021966864 |
| TUT4             | mRNA    | -0.352253226 | 0.017386393 |
| ZC4H2            | mRNA    | -0.352503664 | 0.011123963 |
| hsa_circ_0035110 | circRNA | -0.354162441 | 0.037962713 |
| SLC25A13         | mRNA    | -0.354224678 | 3.77E-04    |

|                  |         |              |             |
|------------------|---------|--------------|-------------|
| TPGS2            | mRNA    | -0.354304665 | 0.008235902 |
| GPAM             | mRNA    | -0.356453699 | 0.006045713 |
| SPARC            | mRNA    | -0.357172607 | 0.029807231 |
| CTSD             | mRNA    | -0.357883637 | 0.016593706 |
| ERCC2            | mRNA    | -0.357999066 | 0.043433754 |
| hsa_circ_0008803 | circRNA | -0.358235171 | 0.04885345  |
| FOXO3            | mRNA    | -0.358530444 | 0.028850223 |
| RRAS2            | mRNA    | -0.35875829  | 0.008281368 |
| TMEM192          | mRNA    | -0.358797029 | 0.018617114 |
| AIG1             | mRNA    | -0.359082045 | 0.031314645 |
| FAM171A1         | mRNA    | -0.359959904 | 0.048178219 |
| ST13             | mRNA    | -0.360161102 | 5.07E-05    |
| GNS              | mRNA    | -0.360263893 | 0.014914982 |
| NPEPPS           | mRNA    | -0.360321098 | 4.11E-04    |
| SEPT11           | mRNA    | -0.360445861 | 0.015489828 |
| ALKBH4           | mRNA    | -0.360521464 | 0.04579236  |
| ZNF510           | mRNA    | -0.360854469 | 0.011815586 |
| NT5C3A           | mRNA    | -0.363152113 | 0.034353224 |
| TBC1D16          | mRNA    | -0.363187823 | 0.017992767 |
| SLC27A1          | mRNA    | -0.363398244 | 0.044916415 |
| RPL5             | mRNA    | -0.364044252 | 8.87E-04    |
| UNKL             | mRNA    | -0.364341746 | 0.037948888 |
| FLJ22447         | lncRNA  | -0.364852497 | 0.041295162 |
| ADAT2            | mRNA    | -0.365520287 | 0.03156338  |
| B3GLCT           | mRNA    | -0.367417425 | 2.81E-04    |

|                  |         |              |             |
|------------------|---------|--------------|-------------|
| PCMTD2           | mRNA    | -0.367770972 | 0.029760754 |
| ZNF292           | mRNA    | -0.368036898 | 0.002626065 |
| B2M              | mRNA    | -0.368882485 | 0.02099464  |
| hsa_circ_0003069 | circRNA | -0.369261816 | 0.003649035 |
| KCTD18           | mRNA    | -0.369549042 | 0.017425602 |
| EHBP1            | mRNA    | -0.369850592 | 3.73E-04    |
| MAML3            | mRNA    | -0.370238322 | 0.006377407 |
| SPIN1            | mRNA    | -0.370824699 | 0.006646167 |
| ABCB7            | mRNA    | -0.370929666 | 0.035860371 |
| hsa_circ_0074652 | circRNA | -0.371026473 | 0.011292767 |
| PHF21A           | mRNA    | -0.374359053 | 0.026219166 |
| ZKSCAN3          | mRNA    | -0.374525018 | 0.002190503 |
| LY75             | mRNA    | -0.37597707  | 0.048923107 |
| hsa_circ_0049591 | circRNA | -0.375982519 | 0.024242716 |
| ZNF232           | mRNA    | -0.375985326 | 0.030681184 |
| CCDC88A          | mRNA    | -0.377240902 | 0.021026821 |
| PRAG1            | mRNA    | -0.377330754 | 0.046096343 |
| JCAD             | mRNA    | -0.377395313 | 0.002747159 |
| SESTD1           | mRNA    | -0.378402089 | 4.51E-04    |
| TMEM126B         | mRNA    | -0.378698862 | 0.017124721 |
| hsa_circ_0074640 | circRNA | -0.378914896 | 0.01852778  |
| C20orf27         | mRNA    | -0.379118447 | 0.025227027 |
| HOXA9            | mRNA    | -0.3794838   | 0.018209005 |
| SCAI             | mRNA    | -0.379514234 | 0.044632407 |
| UBA2             | mRNA    | -0.380196599 | 0.006120417 |

|                  |         |              |             |
|------------------|---------|--------------|-------------|
| CCNJL            | mRNA    | -0.381650514 | 0.036657645 |
| POLB             | mRNA    | -0.382474728 | 0.042012212 |
| NIPSNAP2         | mRNA    | -0.383106546 | 0.002426576 |
| CCDC120          | mRNA    | -0.383247836 | 0.044883063 |
| ALPK1            | mRNA    | -0.383538346 | 0.013579096 |
| hsa_circ_0052486 | circRNA | -0.383940713 | 0.014340248 |
| ZNF606           | mRNA    | -0.385179556 | 0.029797499 |
| TGIF2            | mRNA    | -0.385382562 | 1.29E-05    |
| GCDH             | mRNA    | -0.387391191 | 0.012739825 |
| hsa_circ_0020457 | circRNA | -0.387442693 | 0.045484457 |
| ZNHIT3           | mRNA    | -0.387719433 | 0.037302993 |
| LOC101927060     | lncRNA  | -0.387831053 | 0.021211114 |
| UIMC1            | mRNA    | -0.388024308 | 0.004384808 |
| RPUSD4           | mRNA    | -0.388329575 | 0.028669786 |
| LAMA4            | mRNA    | -0.389747648 | 0.020440692 |
| hsa_circ_0103154 | circRNA | -0.389821471 | 0.035813455 |
| TRIM68           | mRNA    | -0.390230526 | 0.027458008 |
| PCGF5            | mRNA    | -0.390527947 | 0.045254572 |
| hsa_circ_0129595 | circRNA | -0.390720382 | 0.045715934 |
| BCKDHB           | mRNA    | -0.391020089 | 7.06E-04    |
| HMG1             | mRNA    | -0.391266138 | 9.79E-04    |
| hsa_circ_0063463 | circRNA | -0.391299611 | 0.005952542 |
| hsa_circ_0074648 | circRNA | -0.391934574 | 0.003242139 |
| ZNF211           | mRNA    | -0.393898589 | 0.025917754 |
| FN3K             | mRNA    | -0.394480515 | 0.003862935 |

|                  |         |              |             |
|------------------|---------|--------------|-------------|
| KANSL1L          | mRNA    | -0.394881098 | 0.042525181 |
| PAWR             | mRNA    | -0.395238767 | 0.002495688 |
| KATNA1           | mRNA    | -0.395273806 | 0.026506454 |
| USP49            | mRNA    | -0.395770741 | 0.010462387 |
| LANCL1           | mRNA    | -0.395851252 | 3.76E-04    |
| TTBK2            | mRNA    | -0.39596035  | 0.019563504 |
| MPND             | mRNA    | -0.396667764 | 0.024729252 |
| ZNF615           | mRNA    | -0.39675469  | 0.020114775 |
| WDR19            | mRNA    | -0.397254657 | 0.020730735 |
| TRIM62           | mRNA    | -0.397263433 | 0.002279792 |
| OTUD1            | mRNA    | -0.39756167  | 0.042478545 |
| ZNF813           | mRNA    | -0.398834591 | 0.038109026 |
| hsa_circ_0050515 | circRNA | -0.399946628 | 0.037767485 |
| BORCS5           | mRNA    | -0.400260427 | 5.59E-04    |
| LPCAT3           | mRNA    | -0.401077953 | 0.006075129 |
| hsa_circ_0050521 | circRNA | -0.401130223 | 0.035813455 |
| hsa_circ_0021292 | circRNA | -0.401431126 | 0.00698213  |
| ZNF532           | mRNA    | -0.401652816 | 0.002082806 |
| hsa_circ_0084044 | circRNA | -0.402653239 | 0.043071089 |
| POLD4            | mRNA    | -0.403457416 | 0.012067086 |
| SOCS5            | mRNA    | -0.40407288  | 0.009094014 |
| hsa_circ_0026646 | circRNA | -0.404849849 | 0.005701336 |
| hsa_circ_0004293 | circRNA | -0.405090204 | 0.027619437 |
| CLCN5            | mRNA    | -0.40533332  | 0.011343834 |
| STXBP2           | mRNA    | -0.405378355 | 0.012515134 |

|                  |         |              |             |
|------------------|---------|--------------|-------------|
| FBXL20           | mRNA    | -0.40629485  | 0.014070756 |
| CEP57            | mRNA    | -0.406879046 | 0.016492407 |
| hsa_circ_0074643 | circRNA | -0.408122511 | 0.038673635 |
| LOC101930370     | lncRNA  | -0.408125951 | 0.049259008 |
| LINC01578        | lncRNA  | -0.408170873 | 0.005314479 |
| DYRK1B           | mRNA    | -0.408956695 | 8.83E-04    |
| NPM1             | mRNA    | -0.409089014 | 0.002664302 |
| XXYLT1           | mRNA    | -0.409105624 | 0.013086758 |
| POLR2M           | mRNA    | -0.409497481 | 9.31E-07    |
| STK17B           | mRNA    | -0.409904515 | 0.00168839  |
| hsa_circ_0043385 | circRNA | -0.410942584 | 0.043791765 |
| WSB2             | mRNA    | -0.411549474 | 0.001495811 |
| CYP2U1           | mRNA    | -0.411642942 | 0.04035601  |
| HIP1R            | mRNA    | -0.411670048 | 0.016003793 |
| RPS6KB2          | mRNA    | -0.41216453  | 0.002310647 |
| EPB41L4A-AS1     | lncRNA  | -0.412875396 | 5.77E-04    |
| HHAT             | mRNA    | -0.413132096 | 0.03058459  |
| hsa_circ_0017874 | circRNA | -0.413138693 | 0.016095614 |
| hsa_circ_0075009 | circRNA | -0.413307046 | 0.024680613 |
| LINC01278        | lncRNA  | -0.413482684 | 6.06E-04    |
| SPOPL            | mRNA    | -0.413667814 | 6.17E-04    |
| ZFP3             | mRNA    | -0.413761054 | 0.049443301 |
| DZIP1            | mRNA    | -0.413762456 | 1.59E-06    |
| EVC              | mRNA    | -0.413921437 | 6.11E-05    |
| hsa_circ_0026654 | circRNA | -0.414506203 | 0.007026585 |

|                  |         |              |             |
|------------------|---------|--------------|-------------|
| GTDC1            | mRNA    | -0.414720337 | 1.54E-04    |
| hsa_circ_0075012 | circRNA | -0.414945768 | 0.00435372  |
| hsa_circ_0026652 | circRNA | -0.41538339  | 0.006073807 |
| SNX5             | mRNA    | -0.415935058 | 0.001611373 |
| hsa_circ_0043675 | circRNA | -0.416988873 | 0.041904534 |
| NFATC2           | mRNA    | -0.417000485 | 0.005617282 |
| MYO18A           | mRNA    | -0.417372353 | 0.003753318 |
| hsa_circ_0044315 | circRNA | -0.417381967 | 0.026485773 |
| MYL6B            | mRNA    | -0.417492246 | 0.004309894 |
| hsa_circ_0106997 | circRNA | -0.419543334 | 0.015693019 |
| hsa_circ_0044063 | circRNA | -0.419865199 | 0.03673965  |
| hsa_circ_0026645 | circRNA | -0.420414198 | 0.003182206 |
| ZNF518A          | mRNA    | -0.420613823 | 0.00339835  |
| BCKDHA           | mRNA    | -0.421104701 | 0.009837373 |
| hsa_circ_0008092 | circRNA | -0.421493854 | 0.009718302 |
| hsa_circ_0063171 | circRNA | -0.421971339 | 0.007192557 |
| TUBG2            | mRNA    | -0.422586626 | 0.018285779 |
| hsa_circ_0023079 | circRNA | -0.423299849 | 0.03342834  |
| SUOX             | mRNA    | -0.423892622 | 0.002530145 |
| hsa_circ_0060894 | circRNA | -0.424400889 | 0.04370161  |
| SLC25A38         | mRNA    | -0.424730203 | 0.001616135 |
| hsa_circ_0047659 | circRNA | -0.424735703 | 0.035941274 |
| TIFA             | mRNA    | -0.425086642 | 0.030088849 |
| TPP1             | mRNA    | -0.42514209  | 0.001520972 |
| hsa_circ_0074656 | circRNA | -0.425721929 | 0.014374262 |



|                  |         |              |             |
|------------------|---------|--------------|-------------|
| DBT              | mRNA    | -0.425945345 | 4.59E-04    |
| hsa_circ_0063268 | circRNA | -0.426481866 | 4.78E-04    |
| CTPS2            | mRNA    | -0.426651976 | 8.25E-04    |
| PGPEP1           | mRNA    | -0.427289996 | 1.14E-04    |
| hsa_circ_0044265 | circRNA | -0.429309609 | 0.022652738 |
| ARL5A            | mRNA    | -0.430981429 | 0.001936337 |
| UPF3B            | mRNA    | -0.431128064 | 0.020713407 |
| MRPL22           | mRNA    | -0.431265708 | 0.028456508 |
| RFTN2            | mRNA    | -0.431502901 | 0.008834725 |
| ING3             | mRNA    | -0.431786303 | 0.003224216 |
| hsa_circ_0078558 | circRNA | -0.432265475 | 0.042063118 |
| ZBTB44           | mRNA    | -0.432266365 | 0.006905957 |
| hsa_circ_0079970 | circRNA | -0.432671674 | 0.009069308 |
| hsa_circ_0064717 | circRNA | -0.432854127 | 0.029524743 |
| hsa_circ_0107564 | circRNA | -0.433957606 | 0.024266099 |
| FBXL5            | mRNA    | -0.434382234 | 1.51E-04    |
| ZSCAN2           | mRNA    | -0.434736672 | 0.022810739 |
| C1RL             | mRNA    | -0.434757584 | 0.01119989  |
| hsa_circ_0054401 | circRNA | -0.43488719  | 0.045500196 |
| RFK              | mRNA    | -0.435332818 | 0.016998262 |
| EFEMP2           | mRNA    | -0.436074763 | 0.003045897 |
| hsa_circ_0026883 | circRNA | -0.43621232  | 0.035941274 |
| hsa_circ_0137631 | circRNA | -0.436437269 | 0.021998896 |
| RBBP9            | mRNA    | -0.436717077 | 1.72E-05    |
| GALT             | mRNA    | -0.437208441 | 0.016782884 |

|                  |         |              |             |
|------------------|---------|--------------|-------------|
| TMEM131L         | mRNA    | -0.437466592 | 0.001127167 |
| hsa_circ_0064716 | circRNA | -0.437655731 | 0.013266499 |
| hsa_circ_0043382 | circRNA | -0.437940995 | 0.029811942 |
| hsa_circ_0028229 | circRNA | -0.437943467 | 0.016469331 |
| ZFPM2            | mRNA    | -0.438467955 | 0.029552701 |
| hsa_circ_0021998 | circRNA | -0.438609276 | 0.047697841 |
| hsa_circ_0087831 | circRNA | -0.4390762   | 0.0192961   |
| hsa_circ_0003595 | circRNA | -0.439127267 | 0.042229752 |
| EPHB2            | mRNA    | -0.439656062 | 0.027243736 |
| hsa_circ_0017835 | circRNA | -0.439740692 | 0.043011788 |
| STRBP            | mRNA    | -0.440907453 | 1.72E-05    |
| BHLHB9           | mRNA    | -0.441103619 | 0.036947347 |
| PPP3CA           | mRNA    | -0.441646057 | 0.009421278 |
| hsa_circ_0075004 | circRNA | -0.44204566  | 0.017590664 |
| hsa_circ_0037483 | circRNA | -0.443593535 | 0.03722613  |
| VIM              | mRNA    | -0.44367763  | 0.019972214 |
| HDAC10           | mRNA    | -0.443785626 | 0.028716568 |
| PHTF2            | mRNA    | -0.443801481 | 0.02180423  |
| SIPA1L1          | mRNA    | -0.444063892 | 8.89E-05    |
| hsa_circ_0036431 | circRNA | -0.444083794 | 0.041496477 |
| hsa_circ_0003443 | circRNA | -0.444237303 | 0.042063118 |
| LOC101927556     | lncRNA  | -0.444648027 | 4.11E-04    |
| hsa_circ_0109653 | circRNA | -0.445108461 | 0.00435372  |
| GAMT             | mRNA    | -0.445419608 | 0.018891832 |
| hsa_circ_0002358 | circRNA | -0.446270955 | 0.009418207 |

|                  |         |              |             |
|------------------|---------|--------------|-------------|
| FZD1             | mRNA    | -0.446778586 | 0.046325724 |
| hsa_circ_0057516 | circRNA | -0.446802917 | 0.037855531 |
| ZNF662           | mRNA    | -0.446906775 | 0.009391378 |
| hsa_circ_0029150 | circRNA | -0.447867692 | 0.032745575 |
| hsa_circ_0057521 | circRNA | -0.448042337 | 0.032865795 |
| TAF9B            | mRNA    | -0.448651909 | 0.001419054 |
| CHD3             | mRNA    | -0.449172455 | 0.015969054 |
| SNX30            | mRNA    | -0.449274324 | 0.002281719 |
| SLC25A29         | mRNA    | -0.449413678 | 0.001537123 |
| hsa_circ_0137621 | circRNA | -0.449808297 | 0.036751974 |
| hsa_circ_0012213 | circRNA | -0.449883914 | 0.020807852 |
| APH1B            | mRNA    | -0.450035825 | 0.002056831 |
| FAM214A          | mRNA    | -0.450670631 | 0.00494826  |
| ZNF655           | mRNA    | -0.450979379 | 0.024889421 |
| hsa_circ_0017879 | circRNA | -0.451836594 | 0.006825012 |
| MINDY4           | mRNA    | -0.451971996 | 0.004309083 |
| AGPAT5           | mRNA    | -0.452465872 | 1.02E-04    |
| hsa_circ_0057517 | circRNA | -0.452749747 | 0.025472333 |
| hsa_circ_0075001 | circRNA | -0.453604325 | 0.030475574 |
| hsa_circ_0075019 | circRNA | -0.454111343 | 0.036613236 |
| MLLT1            | mRNA    | -0.454237935 | 0.001564431 |
| NCEH1            | mRNA    | -0.454550665 | 0.006970381 |
| hsa_circ_0074995 | circRNA | -0.454627003 | 0.010793689 |
| hsa_circ_0024164 | circRNA | -0.454628013 | 0.027969199 |
| BMT2             | mRNA    | -0.454801112 | 0.005798206 |

|                  |         |              |             |
|------------------|---------|--------------|-------------|
| GIMAP2           | mRNA    | -0.454860468 | 0.007182296 |
| hsa_circ_0064863 | circRNA | -0.455335571 | 0.04917849  |
| SCMH1            | mRNA    | -0.455592829 | 6.33E-05    |
| hsa_circ_0006662 | circRNA | -0.456576668 | 0.032763955 |
| hsa_circ_0061227 | circRNA | -0.456773365 | 0.016000708 |
| hsa_circ_0026649 | circRNA | -0.457389781 | 0.001345251 |
| hsa_circ_0093230 | circRNA | -0.457826417 | 0.039723101 |
| CDIP1            | mRNA    | -0.458403776 | 0.013103791 |
| hsa_circ_0011885 | circRNA | -0.458703278 | 0.029375906 |
| hsa_circ_0112922 | circRNA | -0.459500262 | 0.030221927 |
| hsa_circ_0001007 | circRNA | -0.459519686 | 0.042824532 |
| hsa_circ_0112281 | circRNA | -0.459822821 | 0.044581155 |
| DCAF11           | mRNA    | -0.460073137 | 0.005473733 |
| hsa_circ_0050526 | circRNA | -0.460467663 | 0.018295239 |
| MOSPD3           | mRNA    | -0.46083351  | 0.004879848 |
| BOK              | mRNA    | -0.461339982 | 6.27E-04    |
| RBMS3            | mRNA    | -0.461578149 | 0.039421244 |
| TGFBRAP1         | mRNA    | -0.461768488 | 4.49E-04    |
| hsa_circ_0059499 | circRNA | -0.462067263 | 0.014018431 |
| CEP162           | mRNA    | -0.462808814 | 0.008204337 |
| ZMYM3            | mRNA    | -0.463864889 | 0.031477313 |
| AGPAT2           | mRNA    | -0.464865524 | 0.010999706 |
| hsa_circ_0007007 | circRNA | -0.46601782  | 0.04257512  |
| RCBTB2           | mRNA    | -0.466073962 | 0.006879904 |
| SMURF2           | mRNA    | -0.467711585 | 4.93E-07    |

|                  |         |              |             |
|------------------|---------|--------------|-------------|
| METRNL           | mRNA    | -0.468019687 | 0.027190117 |
| hsa_circ_0115451 | circRNA | -0.46804783  | 0.034350047 |
| LINC00938        | lncRNA  | -0.468600311 | 0.006924793 |
| PHC1             | mRNA    | -0.468999137 | 3.90E-04    |
| ZNF620           | mRNA    | -0.469083258 | 0.045219245 |
| BLOC1S5          | mRNA    | -0.469127256 | 0.004540122 |
| hsa_circ_0085321 | circRNA | -0.47025363  | 0.043071089 |
| hsa_circ_0062521 | circRNA | -0.470865853 | 0.0351108   |
| hsa_circ_0110585 | circRNA | -0.471101425 | 0.045114256 |
| TAF6L            | mRNA    | -0.471245188 | 8.29E-05    |
| hsa_circ_0013185 | circRNA | -0.471308129 | 0.004506025 |
| hsa_circ_0026908 | circRNA | -0.472606479 | 0.018911328 |
| PUS10            | mRNA    | -0.473269927 | 0.007021639 |
| hsa_circ_0012210 | circRNA | -0.473933379 | 0.010124157 |
| hsa_circ_0017880 | circRNA | -0.47403321  | 0.005331392 |
| OAZ1             | mRNA    | -0.474261184 | 6.80E-04    |
| hsa_circ_0045321 | circRNA | -0.474285033 | 0.014034242 |
| hsa_circ_0097671 | circRNA | -0.475500599 | 0.037950933 |
| STMN1            | mRNA    | -0.475542899 | 0.047671236 |
| PINK1            | mRNA    | -0.47594605  | 0.027246259 |
| ODC1             | mRNA    | -0.476191821 | 0.041644429 |
| hsa_circ_0128537 | circRNA | -0.477398862 | 0.01493257  |
| IGF2R            | mRNA    | -0.477800443 | 0.022661755 |
| DNMT3B           | mRNA    | -0.477860547 | 0.014915275 |
| RNF8             | mRNA    | -0.477979124 | 0.00975883  |

|                  |         |              |             |
|------------------|---------|--------------|-------------|
| hsa_circ_0075005 | circRNA | -0.478524226 | 0.002726843 |
| OXCT1            | mRNA    | -0.478654172 | 0.017393069 |
| HTRA1            | mRNA    | -0.478841534 | 2.09E-05    |
| ATP7A            | mRNA    | -0.479561392 | 0.018550769 |
| EXTL2            | mRNA    | -0.479984355 | 4.16E-04    |
| hsa_circ_0106585 | circRNA | -0.480305575 | 0.030891206 |
| RNF144A          | mRNA    | -0.480347998 | 0.014866109 |
| PFKM             | mRNA    | -0.48094719  | 5.16E-08    |
| EEF1AKMT1        | mRNA    | -0.481016544 | 0.00601365  |
| hsa_circ_0026015 | circRNA | -0.4813256   | 0.013274003 |
| NID1             | mRNA    | -0.481643053 | 2.96E-04    |
| ZNF91            | mRNA    | -0.481861628 | 1.03E-04    |
| RAB4A            | mRNA    | -0.482103606 | 0.005937419 |
| LYRM1            | mRNA    | -0.482256985 | 0.049963759 |
| hsa_circ_0124869 | circRNA | -0.482449068 | 0.033420468 |
| FAM13A           | mRNA    | -0.482560998 | 0.005203441 |
| MYO10            | mRNA    | -0.482684329 | 0.028155281 |
| hsa_circ_0005671 | circRNA | -0.482768376 | 0.036578677 |
| NDRG3            | mRNA    | -0.48326994  | 0.002275436 |
| SLC16A1          | mRNA    | -0.48336277  | 0.003854266 |
| TSPYL4           | mRNA    | -0.483907847 | 7.68E-04    |
| hsa_circ_0008081 | circRNA | -0.484002717 | 0.001468434 |
| CMTR2            | mRNA    | -0.484375741 | 2.29E-04    |
| hsa_circ_0048178 | circRNA | -0.484402933 | 0.004879908 |
| hsa_circ_0050505 | circRNA | -0.484545423 | 0.022588216 |

|                  |         |              |             |
|------------------|---------|--------------|-------------|
| ABCA5            | mRNA    | -0.484927522 | 0.010443089 |
| SNAPC1           | mRNA    | -0.485350446 | 0.009843902 |
| LRRC37A2         | mRNA    | -0.485633359 | 0.006149601 |
| MAP10            | mRNA    | -0.485978019 | 0.030305896 |
| hsa_circ_0006987 | circRNA | -0.486495099 | 0.019781362 |
| hsa_circ_0030680 | circRNA | -0.487144563 | 0.038526779 |
| hsa_circ_0006385 | circRNA | -0.488329758 | 0.022694254 |
| GNPDA1           | mRNA    | -0.488438642 | 0.022790267 |
| SPATA6           | mRNA    | -0.488672206 | 0.012645233 |
| CACHD1           | mRNA    | -0.488810512 | 0.001240157 |
| GAB1             | mRNA    | -0.488817732 | 0.047700694 |
| hsa_circ_0027608 | circRNA | -0.489073282 | 0.040525599 |
| CSNK2A2          | mRNA    | -0.489332574 | 2.02E-04    |
| hsa_circ_0075000 | circRNA | -0.489475228 | 0.00337781  |
| RIMKLB           | mRNA    | -0.489729328 | 7.77E-06    |
| FLCN             | mRNA    | -0.489845353 | 0.032786776 |
| hsa_circ_0107015 | circRNA | -0.490486369 | 0.039740662 |
| hsa_circ_0007050 | circRNA | -0.491285517 | 0.047984701 |
| hsa_circ_0004457 | circRNA | -0.49169706  | 0.015351231 |
| hsa_circ_0007591 | circRNA | -0.49169706  | 0.015351231 |
| KCNC3            | mRNA    | -0.492097992 | 0.041493626 |
| MET              | mRNA    | -0.49211623  | 0.023729652 |
| CYB5RL           | mRNA    | -0.492134177 | 6.11E-04    |
| hsa_circ_0007434 | circRNA | -0.492875358 | 0.015769883 |
| FRAT1            | mRNA    | -0.493236626 | 0.024634985 |

|                  |         |              |             |
|------------------|---------|--------------|-------------|
| HNMT             | mRNA    | -0.493296081 | 0.045651361 |
| hsa_circ_0008212 | circRNA | -0.493300868 | 0.036126175 |
| LCORL            | mRNA    | -0.494625088 | 9.14E-05    |
| hsa_circ_0087827 | circRNA | -0.495613665 | 0.030505626 |
| DTX3             | mRNA    | -0.495784409 | 6.63E-04    |
| BCAS3            | mRNA    | -0.495793161 | 0.002133917 |
| hsa_circ_0008820 | circRNA | -0.496437967 | 0.02290569  |
| hsa_circ_0031219 | circRNA | -0.496784375 | 0.011195558 |
| AHCYL2           | mRNA    | -0.497520172 | 0.011556316 |
| ZNF346           | mRNA    | -0.497616971 | 1.32E-06    |
| hsa_circ_0017095 | circRNA | -0.498468199 | 0.001446633 |
| MGLL             | mRNA    | -0.499734258 | 0.023338593 |
| hsa_circ_0056386 | circRNA | -0.499955559 | 0.044983106 |
| hsa_circ_0119636 | circRNA | -0.499993298 | 0.001623258 |
| FAM124B          | mRNA    | -0.500153251 | 0.030615988 |
| CACFD1           | mRNA    | -0.500557501 | 0.011097625 |
| hsa_circ_0108334 | circRNA | -0.500565734 | 0.018586409 |
| hsa_circ_0109471 | circRNA | -0.501010172 | 0.00375756  |
| TFB1M            | mRNA    | -0.501033042 | 0.00357303  |
| hsa_circ_0070502 | circRNA | -0.501207402 | 0.032655151 |
| hsa_circ_0015073 | circRNA | -0.501365654 | 0.027577228 |
| DIS3L            | mRNA    | -0.501397813 | 3.82E-06    |
| hsa_circ_0106833 | circRNA | -0.501679329 | 0.01971967  |
| ZEB2             | mRNA    | -0.501840535 | 0.006128309 |
| hsa_circ_0081813 | circRNA | -0.50184512  | 0.023314861 |



|                  |         |              |             |
|------------------|---------|--------------|-------------|
| ZNF43            | mRNA    | -0.502343551 | 3.11E-04    |
| hsa_circ_0078651 | circRNA | -0.50259449  | 0.007439092 |
| LOC102723694     | lncRNA  | -0.503088974 | 0.031477313 |
| LRP6             | mRNA    | -0.504016595 | 0.04579236  |
| PABPC4L          | mRNA    | -0.504283893 | 0.04225039  |
| hsa_circ_0048640 | circRNA | -0.505227436 | 0.0365149   |
| hsa_circ_0005341 | circRNA | -0.506208818 | 0.014078056 |
| SMO              | mRNA    | -0.506243896 | 0.043558066 |
| hsa_circ_0050549 | circRNA | -0.506644767 | 0.017941679 |
| hsa_circ_0048177 | circRNA | -0.506774997 | 0.005947637 |
| hsa_circ_0027609 | circRNA | -0.508375581 | 0.037941183 |
| TUSC3            | mRNA    | -0.508582294 | 0.037127416 |
| hsa_circ_0050947 | circRNA | -0.508603852 | 0.034098996 |
| hsa_circ_0058096 | circRNA | -0.508745535 | 0.030414009 |
| hsa_circ_0107465 | circRNA | -0.510957894 | 0.009265506 |
| SUMF1            | mRNA    | -0.511169025 | 0.008749227 |
| hsa_circ_0100010 | circRNA | -0.511698724 | 0.002787662 |
| REL              | mRNA    | -0.511886277 | 0.041275395 |
| MOCS1            | mRNA    | -0.512159585 | 7.60E-04    |
| hsa_circ_0117035 | circRNA | -0.51220155  | 0.019717117 |
| hsa_circ_0029151 | circRNA | -0.512306216 | 0.005570055 |
| RHNO1            | mRNA    | -0.51232161  | 0.036444041 |
| COL4A5           | mRNA    | -0.512631063 | 0.024275479 |
| ZBED3            | mRNA    | -0.513186252 | 8.31E-06    |
| hsa_circ_0118330 | circRNA | -0.513224327 | 0.023887613 |

|                  |         |              |             |
|------------------|---------|--------------|-------------|
| hsa_circ_0017099 | circRNA | -0.513893986 | 0.007396553 |
| FAM234B          | mRNA    | -0.514462366 | 1.83E-07    |
| hsa_circ_0051287 | circRNA | -0.514935067 | 0.010793689 |
| hsa_circ_0136892 | circRNA | -0.515007047 | 0.010008066 |
| hsa_circ_0052601 | circRNA | -0.515084116 | 0.021441401 |
| hsa_circ_0007681 | circRNA | -0.515253054 | 0.041794921 |
| ELK4             | mRNA    | -0.515363759 | 0.001387357 |
| hsa_circ_0078652 | circRNA | -0.515434257 | 0.007811709 |
| RHOD             | mRNA    | -0.515569173 | 0.008716012 |
| NINL             | mRNA    | -0.515980878 | 0.001883751 |
| USP30            | mRNA    | -0.516151144 | 0.002311047 |
| hsa_circ_0007981 | circRNA | -0.51629749  | 0.039821776 |
| GM2A             | mRNA    | -0.516364148 | 2.88E-07    |
| hsa_circ_0017878 | circRNA | -0.517264301 | 0.00435372  |
| MPP1             | mRNA    | -0.517941302 | 0.006917389 |
| PLEKHA4          | mRNA    | -0.518110267 | 0.021966864 |
| PTK7             | mRNA    | -0.518469031 | 0.049462024 |
| hsa_circ_0122956 | circRNA | -0.518737761 | 0.01971967  |
| hsa_circ_0077671 | circRNA | -0.518745586 | 0.002414008 |
| PPT1             | mRNA    | -0.519071754 | 0.014754949 |
| hsa_circ_0017094 | circRNA | -0.519162552 | 0.033420468 |
| ING4             | mRNA    | -0.519293281 | 7.83E-06    |
| MTA3             | mRNA    | -0.519348819 | 1.67E-04    |
| ARVCF            | mRNA    | -0.520213789 | 0.011817454 |
| GGT7             | mRNA    | -0.520269691 | 0.042107204 |

|                  |         |              |             |
|------------------|---------|--------------|-------------|
| hsa_circ_0077073 | circRNA | -0.521095472 | 0.017556376 |
| ZNF792           | mRNA    | -0.522128032 | 0.020385008 |
| PRPSAP1          | mRNA    | -0.522631171 | 1.75E-05    |
| RAD51B           | mRNA    | -0.522726074 | 0.001269474 |
| CCDC171          | mRNA    | -0.523430472 | 0.037481662 |
| hsa_circ_0004594 | circRNA | -0.523458234 | 0.003568445 |
| BGIG9606_43971   | lncRNA  | -0.523716127 | 0.034147885 |
| YPEL5            | mRNA    | -0.524153943 | 0.019063232 |
| LMO4             | mRNA    | -0.524545622 | 0.005483235 |
| hsa_circ_0112916 | circRNA | -0.524577379 | 0.041610007 |
| DNMT3A           | mRNA    | -0.524675416 | 1.85E-07    |
| hsa_circ_0011886 | circRNA | -0.525272829 | 0.025081735 |
| hsa_circ_0050522 | circRNA | -0.525418005 | 0.004138322 |
| hsa_circ_0118410 | circRNA | -0.525666945 | 0.038364388 |
| OSBPL1A          | mRNA    | -0.525930182 | 0.001067024 |
| hsa_circ_0036214 | circRNA | -0.526285806 | 6.17E-04    |
| MCU              | mRNA    | -0.52675219  | 9.05E-06    |
| ZNF30            | mRNA    | -0.527170698 | 0.001797983 |
| hsa_circ_0134451 | circRNA | -0.527398333 | 0.014554396 |
| ARID5B           | mRNA    | -0.527971128 | 0.022636934 |
| EPB41            | mRNA    | -0.528348256 | 2.22E-05    |
| hsa_circ_0129206 | circRNA | -0.528886894 | 0.041630541 |
| hsa_circ_0037588 | circRNA | -0.528942021 | 0.020201677 |
| HSPBAP1          | mRNA    | -0.529228155 | 0.033981929 |
| TJP2             | mRNA    | -0.529262103 | 0.022387019 |

|                  |         |              |             |
|------------------|---------|--------------|-------------|
| hsa_circ_0110550 | circRNA | -0.529426783 | 0.006791831 |
| hsa_circ_0009686 | circRNA | -0.530035485 | 0.022216785 |
| LYRM9            | mRNA    | -0.530794191 | 0.006377407 |
| hsa_circ_0094111 | circRNA | -0.531012178 | 0.02723206  |
| ZNF667           | mRNA    | -0.531707076 | 0.028146249 |
| hsa_circ_0127586 | circRNA | -0.532480243 | 0.023841572 |
| hsa_circ_0016150 | circRNA | -0.532529012 | 0.011801801 |
| HIVEP1           | mRNA    | -0.532919413 | 0.00127287  |
| hsa_circ_0045479 | circRNA | -0.533673493 | 0.01400084  |
| AMZ2P1           | pseudo  | -0.535886263 | 0.033623355 |
| hsa_circ_0072013 | circRNA | -0.536658593 | 0.005187928 |
| hsa_circ_0066913 | circRNA | -0.536800929 | 0.003007321 |
| PPP2R3A          | mRNA    | -0.536994273 | 0.037236186 |
| RCN2             | mRNA    | -0.537010608 | 0.028494879 |
| hsa_circ_0016859 | circRNA | -0.537389804 | 0.00790792  |
| GMDS             | mRNA    | -0.53874926  | 0.003372833 |
| hsa_circ_0020339 | circRNA | -0.53927338  | 0.045821251 |
| C7orf31          | mRNA    | -0.539705322 | 0.032786776 |
| hsa_circ_0110015 | circRNA | -0.539862511 | 0.00460902  |
| hsa_circ_0123721 | circRNA | -0.54008365  | 0.01975962  |
| MMP16            | mRNA    | -0.540791988 | 8.94E-04    |
| HOXA11           | mRNA    | -0.540993719 | 0.041266908 |
| hsa_circ_0060205 | circRNA | -0.541053582 | 0.029614262 |
| TSPAN6           | mRNA    | -0.541098044 | 2.01E-04    |
| hsa_circ_0083964 | circRNA | -0.541190668 | 0.011801801 |

|                  |         |              |             |
|------------------|---------|--------------|-------------|
| hsa_circ_0008252 | circRNA | -0.541322806 | 0.047697841 |
| RASSF4           | mRNA    | -0.541981171 | 0.015435911 |
| hsa_circ_0017875 | circRNA | -0.542309944 | 0.001491688 |
| hsa_circ_0059508 | circRNA | -0.54266257  | 0.002608424 |
| hsa_circ_0016851 | circRNA | -0.542749925 | 0.034843649 |
| ABI2             | mRNA    | -0.543080637 | 4.04E-07    |
| KANTR            | lncRNA  | -0.545141093 | 0.029552262 |
| FSTL1            | mRNA    | -0.545453384 | 6.07E-05    |
| CLN8             | mRNA    | -0.545501506 | 0.012093681 |
| hsa_circ_0107031 | circRNA | -0.545861751 | 0.014178345 |
| hsa_circ_0066909 | circRNA | -0.545964804 | 0.003438284 |
| MAPRE2           | mRNA    | -0.546257057 | 9.87E-04    |
| SPATA5           | mRNA    | -0.546358771 | 0.01895796  |
| PIGK             | mRNA    | -0.546422263 | 0.00499266  |
| CPPED1           | mRNA    | -0.547586053 | 9.60E-06    |
| hsa_circ_0010697 | circRNA | -0.547673622 | 0.035022915 |
| hsa_circ_0064713 | circRNA | -0.547800551 | 8.15E-04    |
| PEX2             | mRNA    | -0.549428605 | 0.04225039  |
| TMEM135          | mRNA    | -0.549736498 | 1.40E-04    |
| hsa_circ_0109714 | circRNA | -0.549779267 | 0.037448212 |
| hsa_circ_0017865 | circRNA | -0.550006504 | 0.003863288 |
| hsa_circ_0116929 | circRNA | -0.550022078 | 0.029460688 |
| NFATC1           | mRNA    | -0.550133767 | 3.65E-04    |
| hsa_circ_0125711 | circRNA | -0.550438157 | 0.0365149   |
| hsa_circ_0064037 | circRNA | -0.550488632 | 0.015960934 |

|                  |         |              |             |
|------------------|---------|--------------|-------------|
| UBE4B            | mRNA    | -0.550498289 | 2.27E-05    |
| THAP8            | mRNA    | -0.550843304 | 0.00189418  |
| hsa_circ_0066711 | circRNA | -0.551029706 | 0.023751112 |
| hsa_circ_0114368 | circRNA | -0.551220879 | 0.031580566 |
| KANK1            | mRNA    | -0.551359348 | 0.049837238 |
| MAP2K5           | mRNA    | -0.551453427 | 0.011710787 |
| hsa_circ_0051028 | circRNA | -0.551479231 | 0.005480693 |
| hsa_circ_0075018 | circRNA | -0.551707777 | 0.032931036 |
| C18orf54         | mRNA    | -0.552181424 | 0.014603391 |
| hsa_circ_0075021 | circRNA | -0.552284579 | 0.01644576  |
| hsa_circ_0043673 | circRNA | -0.553023405 | 0.016999395 |
| ZNF462           | mRNA    | -0.553215775 | 3.52E-04    |
| LOC107985544     | lncRNA  | -0.553378017 | 0.031477313 |
| RNF41            | mRNA    | -0.554126417 | 0.026102589 |
| hsa_circ_0110583 | circRNA | -0.554457002 | 0.002995036 |
| RBM43            | mRNA    | -0.554500275 | 0.011169518 |
| SH3D19           | mRNA    | -0.554651985 | 0.011746545 |
| hsa_circ_0015876 | circRNA | -0.555620424 | 0.001478642 |
| THRA             | mRNA    | -0.555732472 | 0.005483235 |
| hsa_circ_0002720 | circRNA | -0.555928641 | 0.011191609 |
| LHFPL6           | mRNA    | -0.556520176 | 0.015880135 |
| ACP2             | mRNA    | -0.557123313 | 1.60E-04    |
| CCDC85C          | mRNA    | -0.557144385 | 0.004921482 |
| hsa_circ_0002862 | circRNA | -0.557423884 | 0.010585962 |
| hsa_circ_0018762 | circRNA | -0.557562996 | 0.013681834 |

|                  |         |              |             |
|------------------|---------|--------------|-------------|
| hsa_circ_0010388 | circRNA | -0.557627721 | 0.022950097 |
| hsa_circ_0075685 | circRNA | -0.558366843 | 0.006746665 |
| CPQ              | mRNA    | -0.558524613 | 0.001091443 |
| ZNF844           | mRNA    | -0.559089319 | 0.029859852 |
| hsa_circ_0058150 | circRNA | -0.559365826 | 0.016733263 |
| hsa_circ_0075154 | circRNA | -0.559423046 | 0.040300666 |
| hsa_circ_0075590 | circRNA | -0.559514881 | 0.030306714 |
| hsa_circ_0123838 | circRNA | -0.560602385 | 0.018823188 |
| hsa_circ_0001260 | circRNA | -0.561984823 | 0.011198979 |
| GPRASP2          | mRNA    | -0.562548921 | 0.0075817   |
| MICAL2           | mRNA    | -0.563150237 | 0.002554937 |
| CERS6            | mRNA    | -0.56347014  | 8.60E-06    |
| WASF3            | mRNA    | -0.563949693 | 0.048846429 |
| hsa_circ_0072003 | circRNA | -0.564300944 | 0.008545687 |
| hsa_circ_0083670 | circRNA | -0.564538486 | 0.001475407 |
| hsa_circ_0010703 | circRNA | -0.564705721 | 0.03912351  |
| hsa_circ_0010701 | circRNA | -0.56485523  | 0.024807331 |
| FSD1             | mRNA    | -0.56494749  | 0.03693834  |
| LDB1             | mRNA    | -0.564952074 | 2.40E-05    |
| ZNF711           | mRNA    | -0.565168478 | 1.87E-04    |
| hsa_circ_0112915 | circRNA | -0.565434506 | 0.029973341 |
| FAM78A           | mRNA    | -0.565668786 | 0.045567796 |
| PBLD             | mRNA    | -0.565735212 | 1.75E-04    |
| MEF2C-AS1        | lncRNA  | -0.565849941 | 0.03383259  |
| GRIK5            | mRNA    | -0.565971205 | 0.006148937 |

|                  |         |              |             |
|------------------|---------|--------------|-------------|
| hsa_circ_0088410 | circRNA | -0.566929004 | 0.013059655 |
| hsa_circ_0017111 | circRNA | -0.567106066 | 1.37E-04    |
| RHOJ             | mRNA    | -0.567108425 | 3.05E-04    |
| hsa_circ_0048823 | circRNA | -0.567315626 | 0.01853926  |
| hsa_circ_0026493 | circRNA | -0.568684392 | 0.029001703 |
| CEP68            | mRNA    | -0.569017719 | 0.00396687  |
| RBMX             | mRNA    | -0.569398258 | 8.50E-04    |
| ARSB             | mRNA    | -0.569470349 | 0.021786055 |
| hsa_circ_0097493 | circRNA | -0.569715828 | 0.004825977 |
| ZNF93            | mRNA    | -0.570046271 | 0.031297766 |
| PDK3             | mRNA    | -0.570126176 | 0.024164533 |
| KAT2B            | mRNA    | -0.570326438 | 5.07E-05    |
| hsa_circ_0004940 | circRNA | -0.570327268 | 0.023875906 |
| LYL1             | mRNA    | -0.571031013 | 0.024853498 |
| hsa_circ_0012248 | circRNA | -0.571146488 | 0.015442499 |
| CDKN1B           | mRNA    | -0.571463766 | 2.61E-04    |
| hsa_circ_0023092 | circRNA | -0.571661292 | 0.030303502 |
| hsa_circ_0026909 | circRNA | -0.572985039 | 0.04120107  |
| MPP7             | mRNA    | -0.573210428 | 0.034778817 |
| hsa_circ_0027436 | circRNA | -0.573233851 | 0.023833786 |
| hsa_circ_0017867 | circRNA | -0.573382439 | 0.002714749 |
| TMEM268          | mRNA    | -0.575220129 | 0.016324256 |
| RMND1            | mRNA    | -0.575269239 | 0.004763129 |
| hsa_circ_0130783 | circRNA | -0.576466006 | 0.024517296 |
| hsa_circ_0009052 | circRNA | -0.576544063 | 0.035627066 |



|                  |         |              |             |
|------------------|---------|--------------|-------------|
| ZNF827           | mRNA    | -0.576653909 | 6.80E-06    |
| hsa_circ_0017882 | circRNA | -0.577977614 | 3.21E-04    |
| hsa_circ_0010607 | circRNA | -0.578959995 | 0.020341011 |
| hsa_circ_0032150 | circRNA | -0.579286312 | 0.003122198 |
| hsa_circ_0066912 | circRNA | -0.579974826 | 3.48E-04    |
| MBTD1            | mRNA    | -0.580119151 | 4.77E-04    |
| hsa_circ_0010095 | circRNA | -0.581183539 | 0.02735311  |
| GMPR             | mRNA    | -0.581190038 | 6.39E-06    |
| VEGFB            | mRNA    | -0.581206337 | 1.44E-05    |
| MERTK            | mRNA    | -0.581338995 | 2.32E-06    |
| hsa_circ_0071992 | circRNA | -0.581473078 | 3.47E-04    |
| hsa_circ_0025472 | circRNA | -0.58229605  | 0.01855845  |
| ABL2             | mRNA    | -0.582756528 | 4.85E-07    |
| APLP1            | mRNA    | -0.582895456 | 0.037153818 |
| S1PR3            | mRNA    | -0.58314903  | 0.043050154 |
| hsa_circ_0022399 | circRNA | -0.583168428 | 0.02290569  |
| OSER1-DT         | lncRNA  | -0.583445877 | 0.002296118 |
| YPEL3            | mRNA    | -0.583662468 | 0.003437048 |
| hsa_circ_0108327 | circRNA | -0.585060154 | 0.004977128 |
| hsa_circ_0041978 | circRNA | -0.585983379 | 0.001051865 |
| hsa_circ_0061009 | circRNA | -0.58618253  | 0.001437663 |
| HHIP-AS1         | lncRNA  | -0.586399895 | 0.029279473 |
| hsa_circ_0028938 | circRNA | -0.587124926 | 0.018302621 |
| hsa_circ_0003582 | circRNA | -0.587375264 | 0.023183805 |
| BGIG9606_56119   | lncRNA  | -0.588244145 | 0.036812772 |

|                  |         |              |             |
|------------------|---------|--------------|-------------|
| hsa_circ_0026912 | circRNA | -0.588514045 | 0.043752409 |
| hsa_circ_0050556 | circRNA | -0.58854322  | 0.004596715 |
| hsa_circ_0066311 | circRNA | -0.589108216 | 0.004558527 |
| PTGFRN           | mRNA    | -0.589728018 | 7.47E-04    |
| hsa_circ_0111798 | circRNA | -0.59117651  | 0.014143391 |
| hsa_circ_0027428 | circRNA | -0.591627099 | 0.019982278 |
| SEMA6C           | mRNA    | -0.591801754 | 0.028228645 |
| hsa_circ_0044814 | circRNA | -0.592367135 | 0.009677673 |
| hsa_circ_0064030 | circRNA | -0.592422587 | 0.007487573 |
| hsa_circ_0006620 | circRNA | -0.592855728 | 0.028796401 |
| HIBADH           | mRNA    | -0.593099937 | 8.72E-06    |
| hsa_circ_0051500 | circRNA | -0.593384234 | 0.015581991 |
| hsa_circ_0109473 | circRNA | -0.593919639 | 0.016302139 |
| LOXL2            | mRNA    | -0.594695447 | 1.86E-07    |
| hsa_circ_0000369 | circRNA | -0.595124707 | 0.009918998 |
| hsa_circ_0020946 | circRNA | -0.595468411 | 0.020050771 |
| TRIM45           | mRNA    | -0.595623413 | 0.003481474 |
| hsa_circ_0043670 | circRNA | -0.596203592 | 0.027373375 |
| TMCC3            | mRNA    | -0.59627699  | 0.01598238  |
| hsa_circ_0030858 | circRNA | -0.596872828 | 2.18E-04    |
| hsa_circ_0047822 | circRNA | -0.597229739 | 0.023259741 |
| hsa_circ_0055982 | circRNA | -0.598116132 | 0.026881972 |
| ZNF521           | mRNA    | -0.59813638  | 0.012255854 |
| MDK              | mRNA    | -0.598769859 | 0.014894327 |
| hsa_circ_0107678 | circRNA | -0.598896341 | 0.020650732 |

|                  |         |              |             |
|------------------|---------|--------------|-------------|
| GTF2IRD2         | mRNA    | -0.598904369 | 0.016357326 |
| hsa_circ_0064714 | circRNA | -0.599682865 | 0.003676085 |
| LOC389765        | pseudo  | -0.599828117 | 0.00302562  |
| hsa_circ_0017884 | circRNA | -0.600100389 | 6.00E-04    |
| hsa_circ_0061010 | circRNA | -0.600509321 | 0.006621776 |
| hsa_circ_0004124 | circRNA | -0.600673588 | 0.0351108   |
| hsa_circ_0010677 | circRNA | -0.600677787 | 0.042181654 |
| MBNL3            | mRNA    | -0.600861576 | 7.28E-06    |
| MXI1             | mRNA    | -0.6010044   | 0.005820699 |
| PYCARD           | mRNA    | -0.60115828  | 0.030754608 |
| ACADS            | mRNA    | -0.60119979  | 4.32E-05    |
| SYNGR1           | mRNA    | -0.602798466 | 4.27E-04    |
| hsa_circ_0030844 | circRNA | -0.60296528  | 0.013641453 |
| hsa_circ_0066365 | circRNA | -0.603229926 | 0.037254018 |
| ANKRD50          | mRNA    | -0.603319319 | 5.59E-04    |
| USP51            | mRNA    | -0.603609576 | 0.008169955 |
| hsa_circ_0076292 | circRNA | -0.604037929 | 0.045326933 |
| SEMA4D           | mRNA    | -0.604461716 | 0.001565876 |
| ZNF821           | mRNA    | -0.60451318  | 2.74E-05    |
| hsa_circ_0030850 | circRNA | -0.604842886 | 0.007878116 |
| hsa_circ_0112921 | circRNA | -0.605005232 | 0.003603997 |
| PBX1             | mRNA    | -0.605010939 | 6.47E-04    |
| hsa_circ_0081567 | circRNA | -0.605072769 | 0.015088425 |
| hsa_circ_0130893 | circRNA | -0.605377675 | 0.045874225 |
| BGIG9606_66731   | lncRNA  | -0.605662775 | 0.02014644  |

|                  |         |              |             |
|------------------|---------|--------------|-------------|
| hsa_circ_0065702 | circRNA | -0.60570472  | 0.032202778 |
| hsa_circ_0116839 | circRNA | -0.60661714  | 0.027602952 |
| CBS              | mRNA    | -0.606629883 | 0.014914982 |
| hsa_circ_0074690 | circRNA | -0.607160445 | 0.038330284 |
| COL4A2           | mRNA    | -0.60736004  | 1.41E-06    |
| hsa_circ_0086375 | circRNA | -0.607596409 | 0.018949953 |
| hsa_circ_0003705 | circRNA | -0.607732076 | 0.013244599 |
| FGD4             | mRNA    | -0.609048796 | 2.08E-04    |
| hsa_circ_0066346 | circRNA | -0.610130493 | 0.027505381 |
| TXNRD2           | mRNA    | -0.610137871 | 0.04298137  |
| hsa_circ_0030846 | circRNA | -0.610636055 | 0.024221346 |
| hsa_circ_0064711 | circRNA | -0.610768964 | 1.31E-04    |
| hsa_circ_0072007 | circRNA | -0.61113907  | 0.014613435 |
| hsa_circ_0087835 | circRNA | -0.61133082  | 0.001284497 |
| TWSG1            | mRNA    | -0.61147242  | 0.001373478 |
| hsa_circ_0066345 | circRNA | -0.612401609 | 0.022461612 |
| CGNL1            | mRNA    | -0.613102469 | 0.024958415 |
| EVA1A            | mRNA    | -0.613301788 | 0.033277584 |
| hsa_circ_0126378 | circRNA | -0.613436941 | 0.025915174 |
| hsa_circ_0096397 | circRNA | -0.613502576 | 0.021712416 |
| CTNNBIP1         | mRNA    | -0.615171051 | 1.60E-04    |
| TMEM25           | mRNA    | -0.615268449 | 0.007755051 |
| RAB38            | mRNA    | -0.615415428 | 0.00244785  |
| hsa_circ_0003006 | circRNA | -0.616594908 | 0.004470026 |
| LOC285074        | pseudo  | -0.6175185   | 9.51E-04    |

|                  |         |              |             |
|------------------|---------|--------------|-------------|
| MACROD1          | mRNA    | -0.618943466 | 0.00217611  |
| hsa_circ_0001018 | circRNA | -0.619564625 | 0.011641494 |
| hsa_circ_0020305 | circRNA | -0.619639058 | 0.010917525 |
| hsa_circ_0043671 | circRNA | -0.62032345  | 0.002936228 |
| hsa_circ_0128534 | circRNA | -0.620534583 | 0.038307745 |
| hsa_circ_0050533 | circRNA | -0.620609706 | 4.87E-04    |
| hsa_circ_0128535 | circRNA | -0.620644078 | 0.003242139 |
| hsa_circ_0035875 | circRNA | -0.620982693 | 0.030641715 |
| hsa_circ_0010686 | circRNA | -0.621407753 | 0.016570356 |
| PAFAH1B3         | mRNA    | -0.621643358 | 2.34E-05    |
| MARCKS           | mRNA    | -0.622235424 | 0.004044952 |
| PDE7B            | mRNA    | -0.623291046 | 0.042895515 |
| hsa_circ_0075020 | circRNA | -0.623308764 | 3.75E-04    |
| hsa_circ_0010600 | circRNA | -0.624699398 | 0.018409932 |
| THEMIS2          | mRNA    | -0.624702014 | 0.002311047 |
| hsa_circ_0055814 | circRNA | -0.625271178 | 0.004084694 |
| hsa_circ_0010097 | circRNA | -0.625335541 | 0.019696682 |
| hsa_circ_0066295 | circRNA | -0.625454969 | 0.025509409 |
| ANXA2R           | mRNA    | -0.625635289 | 0.030876254 |
| CREBRF           | mRNA    | -0.625710232 | 0.019699772 |
| hsa_circ_0066308 | circRNA | -0.626691941 | 0.007236394 |
| LXN              | mRNA    | -0.626762967 | 0.009147687 |
| ZNF713           | mRNA    | -0.627130661 | 0.001289198 |
| OPRL1            | mRNA    | -0.62788942  | 0.006489973 |
| hsa_circ_0005351 | circRNA | -0.628601968 | 0.012421973 |

|                  |         |              |             |
|------------------|---------|--------------|-------------|
| hsa_circ_0070664 | circRNA | -0.628681201 | 0.036292609 |
| PIP4K2C          | mRNA    | -0.628979031 | 1.17E-04    |
| CISH             | mRNA    | -0.629349697 | 0.005092511 |
| BGIG9606_45434   | lncRNA  | -0.63044629  | 0.037141748 |
| hsa_circ_0097495 | circRNA | -0.630854308 | 0.00497594  |
| hsa_circ_0054259 | circRNA | -0.631304741 | 0.01172375  |
| GTF2IRD2B        | mRNA    | -0.631591135 | 0.019649265 |
| hsa_circ_0058098 | circRNA | -0.631960928 | 0.010395205 |
| hsa_circ_0010609 | circRNA | -0.63220186  | 0.003868633 |
| hsa_circ_0052598 | circRNA | -0.632993773 | 0.002702957 |
| TET1             | mRNA    | -0.6331522   | 2.06E-06    |
| ATP8A1           | mRNA    | -0.633166675 | 0.038233929 |
| hsa_circ_0110048 | circRNA | -0.633954969 | 0.028255625 |
| HOMER3           | mRNA    | -0.634613887 | 0.001714221 |
| CTSC             | mRNA    | -0.635101328 | 4.01E-06    |
| FOXO1            | mRNA    | -0.635495256 | 0.046858899 |
| GLS              | mRNA    | -0.635541057 | 2.84E-07    |
| hsa_circ_0071980 | circRNA | -0.635664446 | 0.024099165 |
| hsa_circ_0058138 | circRNA | -0.635729975 | 0.007322884 |
| ZNF850           | mRNA    | -0.635913964 | 0.004332433 |
| ADGRL1           | mRNA    | -0.636465221 | 2.08E-04    |
| hsa_circ_0114304 | circRNA | -0.636746518 | 0.003242494 |
| hsa_circ_0026490 | circRNA | -0.637490245 | 7.18E-05    |
| hsa_circ_0000061 | circRNA | -0.6380678   | 0.045660896 |
| LDLRAD4          | mRNA    | -0.638341407 | 0.001026797 |

|                  |         |              |             |
|------------------|---------|--------------|-------------|
| NMRK1            | mRNA    | -0.639374941 | 1.86E-04    |
| hsa_circ_0060416 | circRNA | -0.639649515 | 0.014149215 |
| FBXO42           | mRNA    | -0.640105175 | 2.21E-04    |
| YAP1             | mRNA    | -0.642043463 | 0.003952064 |
| hsa_circ_0007075 | circRNA | -0.642252073 | 0.005759019 |
| AXIN2            | mRNA    | -0.642267807 | 0.00948554  |
| hsa_circ_0047390 | circRNA | -0.642668916 | 9.81E-05    |
| LINC01776        | lncRNA  | -0.643236625 | 0.006758179 |
| hsa_circ_0115349 | circRNA | -0.643297505 | 0.008319373 |
| hsa_circ_0010601 | circRNA | -0.643799598 | 0.003028845 |
| hsa_circ_0137624 | circRNA | -0.64392923  | 0.001829947 |
| TP53INP1         | mRNA    | -0.644004792 | 7.84E-05    |
| hsa_circ_0135246 | circRNA | -0.644536349 | 0.025472333 |
| AP1B1            | mRNA    | -0.644784478 | 0.017653916 |
| CHST15           | mRNA    | -0.64495756  | 0.007546315 |
| hsa_circ_0087289 | circRNA | -0.645463084 | 0.02373636  |
| hsa_circ_0010146 | circRNA | -0.646059209 | 0.024456011 |
| SORD             | mRNA    | -0.646223203 | 4.60E-05    |
| hsa_circ_0070054 | circRNA | -0.646273776 | 0.019187688 |
| hsa_circ_0002198 | circRNA | -0.646334951 | 0.016173303 |
| hsa_circ_0091638 | circRNA | -0.646454483 | 0.001040669 |
| hsa_circ_0072014 | circRNA | -0.647450231 | 2.88E-04    |
| TMEM44           | mRNA    | -0.647566862 | 0.002595324 |
| hsa_circ_0136471 | circRNA | -0.64832664  | 0.015059445 |
| DSP              | mRNA    | -0.648671003 | 0.02119597  |

|                  |         |              |             |
|------------------|---------|--------------|-------------|
| hsa_circ_0010608 | circRNA | -0.64890019  | 0.005330204 |
| hsa_circ_0013332 | circRNA | -0.648958839 | 0.027181388 |
| CIRBP            | mRNA    | -0.649063083 | 8.86E-04    |
| hsa_circ_0060889 | circRNA | -0.65017059  | 0.011053854 |
| C5               | mRNA    | -0.650674039 | 0.014221976 |
| ARRDC4           | mRNA    | -0.65109582  | 0.009720561 |
| PECR             | mRNA    | -0.652637711 | 0.02215003  |
| hsa_circ_0015420 | circRNA | -0.654268299 | 0.001517533 |
| ZNF425           | mRNA    | -0.654860016 | 0.04884558  |
| KLF12            | mRNA    | -0.654926956 | 0.002534458 |
| BTG1             | mRNA    | -0.655169036 | 0.00132612  |
| hsa_circ_0104124 | circRNA | -0.65569458  | 0.002486727 |
| FAM172A          | mRNA    | -0.655871119 | 2.61E-04    |
| hsa_circ_0066067 | circRNA | -0.656518253 | 0.01670908  |
| PIK3CD           | mRNA    | -0.65652152  | 0.011793361 |
| hsa_circ_0081574 | circRNA | -0.656756513 | 0.002182609 |
| SPINT1           | mRNA    | -0.656774207 | 0.007700964 |
| MSI2             | mRNA    | -0.657124709 | 0.006017906 |
| hsa_circ_0128403 | circRNA | -0.657690339 | 0.003635015 |
| hsa_circ_0006887 | circRNA | -0.658691463 | 0.03687346  |
| hsa_circ_0058140 | circRNA | -0.659473524 | 0.006475741 |
| hsa_circ_0109320 | circRNA | -0.659585391 | 0.029063002 |
| hsa_circ_0030847 | circRNA | -0.659663183 | 9.23E-05    |
| ZBED3-AS1        | lncRNA  | -0.659715714 | 0.00270801  |
| hsa_circ_0120084 | circRNA | -0.661889019 | 0.001071052 |



|                  |         |              |             |
|------------------|---------|--------------|-------------|
| ZC3H12B          | mRNA    | -0.662035233 | 0.046571608 |
| WNK3             | mRNA    | -0.662219799 | 6.54E-06    |
| hsa_circ_0044436 | circRNA | -0.66245423  | 0.001672027 |
| TLE1             | mRNA    | -0.662847105 | 1.04E-06    |
| TRIM59           | mRNA    | -0.663369171 | 0.001415599 |
| hsa_circ_0010702 | circRNA | -0.663634977 | 0.003603997 |
| hsa_circ_0055981 | circRNA | -0.663642692 | 2.93E-04    |
| hsa_circ_0061567 | circRNA | -0.664659022 | 0.043029095 |
| LOC105369968     | lncRNA  | -0.664860088 | 0.001737288 |
| ADM              | mRNA    | -0.664969399 | 0.039254668 |
| hsa_circ_0066301 | circRNA | -0.665153877 | 0.005560124 |
| hsa_circ_0006969 | circRNA | -0.665284506 | 0.018240234 |
| PRRG2            | mRNA    | -0.665753178 | 0.040941399 |
| hsa_circ_0128553 | circRNA | -0.66590231  | 0.005249405 |
| CCNJ             | mRNA    | -0.666090125 | 9.50E-05    |
| HEPH             | mRNA    | -0.666163348 | 0.00127287  |
| hsa_circ_0086376 | circRNA | -0.667646638 | 0.00434195  |
| ARHGEF28         | mRNA    | -0.667929944 | 0.008188938 |
| LOC374443        | pseudo  | -0.668051859 | 0.001835168 |
| TIPARP           | mRNA    | -0.668068551 | 0.015431599 |
| hsa_circ_0042242 | circRNA | -0.668169028 | 0.00244015  |
| hsa_circ_0073120 | circRNA | -0.668790908 | 0.016629964 |
| PLCG2            | mRNA    | -0.669575286 | 0.002914313 |
| hsa_circ_0047391 | circRNA | -0.669662364 | 9.97E-06    |
| H2AFZ            | mRNA    | -0.670240305 | 0.007091326 |

|                  |         |              |             |
|------------------|---------|--------------|-------------|
| hsa_circ_0056395 | circRNA | -0.670391043 | 0.004514168 |
| hsa_circ_0066370 | circRNA | -0.67122586  | 0.040697088 |
| CERK             | mRNA    | -0.671736221 | 0.00934573  |
| hsa_circ_0077626 | circRNA | -0.673229815 | 0.044964598 |
| ERCC6            | mRNA    | -0.673450861 | 5.41E-04    |
| hsa_circ_0066302 | circRNA | -0.673462028 | 0.004539567 |
| MYOZ3            | mRNA    | -0.673566436 | 0.012071219 |
| GALNT10          | mRNA    | -0.673765174 | 0.003301491 |
| hsa_circ_0115107 | circRNA | -0.673771091 | 0.010423523 |
| hsa_circ_0072995 | circRNA | -0.673959969 | 0.004084694 |
| hsa_circ_0126694 | circRNA | -0.674484766 | 0.004084694 |
| hsa_circ_0094053 | circRNA | -0.674658358 | 0.004852737 |
| hsa_circ_0072994 | circRNA | -0.674715273 | 0.006736439 |
| hsa_circ_0087317 | circRNA | -0.675154    | 2.38E-04    |
| hsa_circ_0045476 | circRNA | -0.675219378 | 0.010131547 |
| FOXP4            | mRNA    | -0.675497322 | 0.004888155 |
| TMEM132A         | mRNA    | -0.676189286 | 3.10E-04    |
| PBXIP1           | mRNA    | -0.676189494 | 6.44E-05    |
| PLA2R1           | mRNA    | -0.676377503 | 0.013650657 |
| hsa_circ_0090061 | circRNA | -0.676671327 | 4.93E-04    |
| hsa_circ_0015424 | circRNA | -0.676775145 | 0.022490348 |
| hsa_circ_0043498 | circRNA | -0.676948475 | 0.006298437 |
| hsa_circ_0006310 | circRNA | -0.677035143 | 0.005432091 |
| RASL11A          | mRNA    | -0.677036523 | 0.0455665   |
| hsa_circ_0010591 | circRNA | -0.67736606  | 0.001484908 |

|                  |         |              |             |
|------------------|---------|--------------|-------------|
| hsa_circ_0105104 | circRNA | -0.677396061 | 0.004539567 |
| hsa_circ_0058136 | circRNA | -0.677999989 | 0.004495211 |
| HSPG2            | mRNA    | -0.678027923 | 0.046325724 |
| hsa_circ_0036064 | circRNA | -0.678054944 | 8.28E-04    |
| RRAGB            | mRNA    | -0.678073403 | 4.86E-05    |
| hsa_circ_0041178 | circRNA | -0.679716936 | 0.00483392  |
| hsa_circ_0008753 | circRNA | -0.680609274 | 1.35E-04    |
| hsa_circ_0008348 | circRNA | -0.680609274 | 1.35E-04    |
| hsa_circ_0081923 | circRNA | -0.681657698 | 0.021005539 |
| hsa_circ_0039154 | circRNA | -0.681902962 | 0.010215231 |
| ARL6IP1          | mRNA    | -0.682417553 | 0.024259919 |
| hsa_circ_0072996 | circRNA | -0.682934005 | 0.004717058 |
| ZNF608           | mRNA    | -0.683011806 | 6.25E-04    |
| hsa_circ_0063841 | circRNA | -0.683300792 | 0.005823041 |
| hsa_circ_0093190 | circRNA | -0.683398231 | 0.016999395 |
| hsa_circ_0067185 | circRNA | -0.683705445 | 0.022001684 |
| hsa_circ_0046855 | circRNA | -0.684337824 | 0.006271121 |
| hsa_circ_0066330 | circRNA | -0.684457649 | 0.019002115 |
| hsa_circ_0080094 | circRNA | -0.684687513 | 0.015368585 |
| LOC100506731     | lncRNA  | -0.685067166 | 2.77E-04    |
| hsa_circ_0061748 | circRNA | -0.685115971 | 0.012649075 |
| hsa_circ_0072515 | circRNA | -0.685388253 | 0.006750892 |
| hsa_circ_0010595 | circRNA | -0.685522539 | 6.53E-04    |
| PARD3            | mRNA    | -0.685899551 | 6.22E-07    |
| hsa_circ_0010605 | circRNA | -0.686124299 | 3.42E-04    |

|                  |         |              |             |
|------------------|---------|--------------|-------------|
| hsa_circ_0058120 | circRNA | -0.68634062  | 0.004369961 |
| hsa_circ_0079629 | circRNA | -0.686518823 | 0.017491457 |
| ZMAT3            | mRNA    | -0.686947998 | 0.004562549 |
| hsa_circ_0025491 | circRNA | -0.687113467 | 0.002959365 |
| MPZL2            | mRNA    | -0.687131154 | 0.016956245 |
| hsa_circ_0015427 | circRNA | -0.687180266 | 9.36E-04    |
| hsa_circ_0068072 | circRNA | -0.688067553 | 5.73E-04    |
| hsa_circ_0057230 | circRNA | -0.688447764 | 0.02431567  |
| FAM171A2         | mRNA    | -0.688732    | 3.34E-04    |
| GMFB             | mRNA    | -0.689085811 | 7.19E-06    |
| hsa_circ_0075013 | circRNA | -0.68937123  | 4.26E-04    |
| hsa_circ_0058111 | circRNA | -0.689491864 | 0.006121934 |
| PPM1M            | mRNA    | -0.689595852 | 7.62E-05    |
| hsa_circ_0010597 | circRNA | -0.689750182 | 5.14E-04    |
| hsa_circ_0010687 | circRNA | -0.68997018  | 0.004241963 |
| hsa_circ_0039155 | circRNA | -0.690597498 | 0.004443958 |
| hsa_circ_0116809 | circRNA | -0.691629385 | 0.001639596 |
| hsa_circ_0132990 | circRNA | -0.693112288 | 0.042824532 |
| hsa_circ_0066366 | circRNA | -0.693200705 | 0.006460929 |
| hsa_circ_0050183 | circRNA | -0.693435073 | 6.76E-04    |
| PARD6G           | mRNA    | -0.693621305 | 0.034460082 |
| LOC100130987     | lncRNA  | -0.693940331 | 0.023790053 |
| hsa_circ_0116928 | circRNA | -0.694358233 | 2.56E-04    |
| hsa_circ_0010606 | circRNA | -0.694424646 | 8.95E-04    |
| COL4A1           | mRNA    | -0.694781521 | 4.91E-05    |

|                  |         |              |             |
|------------------|---------|--------------|-------------|
| LOC730268        | pseudo  | -0.695072976 | 0.022254535 |
| SMIM10L2A        | mRNA    | -0.695215841 | 0.0330589   |
| LIMS1            | mRNA    | -0.695734617 | 6.49E-04    |
| hsa_circ_0136470 | circRNA | -0.696081179 | 0.001265774 |
| hsa_circ_0010612 | circRNA | -0.697781232 | 3.71E-04    |
| hsa_circ_0081575 | circRNA | -0.697878888 | 0.003736176 |
| hsa_circ_0126377 | circRNA | -0.698267445 | 0.013800157 |
| ARHGEF17         | mRNA    | -0.698340792 | 7.92E-04    |
| hsa_circ_0066368 | circRNA | -0.698630215 | 0.025327287 |
| hsa_circ_0010598 | circRNA | -0.69864771  | 6.57E-04    |
| hsa_circ_0071981 | circRNA | -0.698868308 | 0.024800195 |
| SBK1             | mRNA    | -0.699568115 | 0.041082698 |
| hsa_circ_0010593 | circRNA | -0.699838638 | 5.00E-04    |
| hsa_circ_0010577 | circRNA | -0.700010528 | 0.013662901 |
| TSPAN5           | mRNA    | -0.700207831 | 0.010462387 |
| hsa_circ_0077824 | circRNA | -0.700428703 | 0.001932248 |
| hsa_circ_0001432 | circRNA | -0.700440152 | 0.009106439 |
| hsa_circ_0043666 | circRNA | -0.702311607 | 5.57E-04    |
| IPO5P1           | pseudo  | -0.703233713 | 0.004755018 |
| hsa_circ_0058149 | circRNA | -0.70332188  | 7.90E-04    |
| ARHGEF9          | mRNA    | -0.703513122 | 0.001067507 |
| KRT18            | mRNA    | -0.703578179 | 4.35E-09    |
| hsa_circ_0075014 | circRNA | -0.703813343 | 3.43E-04    |
| hsa_circ_0010614 | circRNA | -0.704167401 | 0.002151747 |
| SMS              | mRNA    | -0.705318187 | 8.22E-05    |

|                  |         |              |             |
|------------------|---------|--------------|-------------|
| LOC105378663     | lncRNA  | -0.705523789 | 0.00244785  |
| hsa_circ_0115105 | circRNA | -0.705877528 | 0.021998896 |
| CUBN             | mRNA    | -0.706047834 | 0.001353073 |
| hsa_circ_0093596 | circRNA | -0.706370226 | 0.015381553 |
| hsa_circ_0058139 | circRNA | -0.706445532 | 0.00384998  |
| hsa_circ_0010563 | circRNA | -0.706759742 | 0.009301256 |
| hsa_circ_0010604 | circRNA | -0.706936358 | 4.36E-04    |
| MDFI             | mRNA    | -0.707546875 | 0.002629531 |
| hsa_circ_0023979 | circRNA | -0.707595433 | 4.46E-04    |
| hsa_circ_0062762 | circRNA | -0.708101269 | 0.004565275 |
| hsa_circ_0140039 | circRNA | -0.708126562 | 0.046991634 |
| hsa_circ_0083666 | circRNA | -0.708221753 | 1.22E-06    |
| SOCS3            | mRNA    | -0.708390466 | 4.71E-05    |
| hsa_circ_0058137 | circRNA | -0.708946235 | 0.001429292 |
| PCDH10           | mRNA    | -0.709052883 | 0.035096115 |
| FOXC1            | mRNA    | -0.709382855 | 0.018594778 |
| HOXA11-AS        | lncRNA  | -0.709843431 | 0.001631688 |
| hsa_circ_0113363 | circRNA | -0.710095574 | 0.006898121 |
| hsa_circ_0010602 | circRNA | -0.710501039 | 2.37E-04    |
| NR1D1            | mRNA    | -0.710501804 | 2.69E-04    |
| MYCL             | mRNA    | -0.710693652 | 0.006969086 |
| ZSCAN16          | mRNA    | -0.712501197 | 1.94E-05    |
| hsa_circ_0010615 | circRNA | -0.713348723 | 0.001291944 |
| hsa_circ_0134719 | circRNA | -0.71389801  | 0.044374932 |
| hsa_circ_0090058 | circRNA | -0.714621299 | 1.66E-05    |

|                  |         |              |             |
|------------------|---------|--------------|-------------|
| hsa_circ_0010592 | circRNA | -0.715307023 | 3.60E-04    |
| hsa_circ_0017873 | circRNA | -0.7153727   | 0.001429292 |
| hsa_circ_0047389 | circRNA | -0.716177501 | 0.001518953 |
| ARRDC2           | mRNA    | -0.716629532 | 0.003254534 |
| hsa_circ_0104348 | circRNA | -0.717197476 | 0.001407287 |
| hsa_circ_0026911 | circRNA | -0.717816053 | 0.026881972 |
| NR1D2            | mRNA    | -0.717855495 | 0.00102238  |
| GCHFR            | mRNA    | -0.718274044 | 0.02397727  |
| hsa_circ_0010603 | circRNA | -0.718357636 | 2.37E-04    |
| hsa_circ_0042241 | circRNA | -0.718516053 | 0.00277432  |
| hsa_circ_0083669 | circRNA | -0.720049066 | 0.04120107  |
| hsa_circ_0010688 | circRNA | -0.720180689 | 7.20E-04    |
| hsa_circ_0030835 | circRNA | -0.720632115 | 9.78E-05    |
| RGS3             | mRNA    | -0.72087284  | 0.003979019 |
| SEMA6D           | mRNA    | -0.72138121  | 1.69E-08    |
| hsa_circ_0045477 | circRNA | -0.721402647 | 0.025397611 |
| hsa_circ_0008727 | circRNA | -0.721664132 | 0.012022164 |
| hsa_circ_0003353 | circRNA | -0.722174937 | 0.03169328  |
| ARHGEF25         | mRNA    | -0.722176385 | 0.004859659 |
| ADA              | mRNA    | -0.722409671 | 0.003320031 |
| RND2             | mRNA    | -0.722468019 | 0.015690656 |
| hsa_circ_0029158 | circRNA | -0.722498906 | 0.005746886 |
| CD302            | mRNA    | -0.722908946 | 0.042340322 |
| USP44            | mRNA    | -0.722932561 | 0.015785205 |
| LOC101927855     | lncRNA  | -0.723185387 | 0.025750408 |

|                  |         |              |             |
|------------------|---------|--------------|-------------|
| hsa_circ_0036418 | circRNA | -0.723894416 | 0.007112273 |
| PTCH1            | mRNA    | -0.724031905 | 0.002629531 |
| CTSK             | mRNA    | -0.724244911 | 6.33E-04    |
| hsa_circ_0093191 | circRNA | -0.724378033 | 0.001528119 |
| hsa_circ_0073719 | circRNA | -0.724922672 | 0.044815114 |
| NXN              | mRNA    | -0.725188292 | 1.65E-05    |
| CASC10           | lncRNA  | -0.72540225  | 0.017779863 |
| hsa_circ_0010613 | circRNA | -0.725446289 | 0.001188324 |
| hsa_circ_0073737 | circRNA | -0.726059164 | 0.018988939 |
| hsa_circ_0010759 | circRNA | -0.726185983 | 0.008870434 |
| PDE8B            | mRNA    | -0.726642811 | 0.027492506 |
| GLIPR1           | mRNA    | -0.727150209 | 0.022250304 |
| ASH2L            | mRNA    | -0.727292861 | 3.33E-05    |
| NIPBL-DT         | lncRNA  | -0.727541725 | 0.001067507 |
| hsa_circ_0006773 | circRNA | -0.7277792   | 6.87E-05    |
| hsa_circ_0010584 | circRNA | -0.728068666 | 0.001044662 |
| hsa_circ_0061011 | circRNA | -0.728096022 | 2.09E-05    |
| TCEANC           | mRNA    | -0.728107222 | 0.027546966 |
| hsa_circ_0030860 | circRNA | -0.728683406 | 0.008870434 |
| FOXN3            | mRNA    | -0.72920898  | 1.48E-14    |
| hsa_circ_0005475 | circRNA | -0.729628599 | 4.90E-05    |
| hsa_circ_0056122 | circRNA | -0.730384512 | 0.026908592 |
| hsa_circ_0008135 | circRNA | -0.730431563 | 4.46E-04    |
| CD37             | mRNA    | -0.730798119 | 0.027707067 |
| hsa_circ_0083941 | circRNA | -0.731550186 | 0.003413311 |



|                  |         |              |             |
|------------------|---------|--------------|-------------|
| hsa_circ_0010599 | circRNA | -0.732889496 | 0.001809784 |
| SLC45A3          | mRNA    | -0.732998309 | 1.20E-04    |
| hsa_circ_0079665 | circRNA | -0.733231465 | 3.56E-05    |
| hsa_circ_0083290 | circRNA | -0.733955997 | 0.01359331  |
| MIR4435-2HG      | lncRNA  | -0.734347933 | 5.96E-04    |
| hsa_circ_0054286 | circRNA | -0.734350655 | 0.036292609 |
| hsa_circ_0028873 | circRNA | -0.734711815 | 0.021458675 |
| PHACTR2          | mRNA    | -0.735266369 | 0.024372654 |
| hsa_circ_0107466 | circRNA | -0.735662331 | 2.37E-04    |
| ZNF395           | mRNA    | -0.736585866 | 0.001487606 |
| hsa_circ_0062759 | circRNA | -0.736726188 | 0.014917608 |
| ARL4A            | mRNA    | -0.737945597 | 0.02063051  |
| IFITM10          | mRNA    | -0.738135839 | 6.19E-04    |
| hsa_circ_0067593 | circRNA | -0.738148051 | 0.010370964 |
| hsa_circ_0030863 | circRNA | -0.738777292 | 0.029811942 |
| hsa_circ_0126381 | circRNA | -0.739452171 | 0.041031438 |
| PDCD4            | mRNA    | -0.739625812 | 0.004755018 |
| ADA2             | mRNA    | -0.739974273 | 8.10E-05    |
| hsa_circ_0069320 | circRNA | -0.74048901  | 0.01504697  |
| C9orf116         | mRNA    | -0.741576434 | 0.043202536 |
| hsa_circ_0010766 | circRNA | -0.741746807 | 0.033376989 |
| ADGRA3           | mRNA    | -0.74189616  | 1.69E-08    |
| hsa_circ_0008130 | circRNA | -0.742751453 | 0.035998355 |
| hsa_circ_0007304 | circRNA | -0.742875825 | 0.002655274 |
| hsa_circ_0060206 | circRNA | -0.743449647 | 0.001262878 |

|                  |         |              |             |
|------------------|---------|--------------|-------------|
| PTER             | mRNA    | -0.744709828 | 0.001525228 |
| hsa_circ_0113002 | circRNA | -0.744772545 | 3.39E-04    |
| CALD1            | mRNA    | -0.745429258 | 0.00338705  |
| hsa_circ_0010765 | circRNA | -0.745530996 | 0.023592469 |
| hsa_circ_0137021 | circRNA | -0.746423445 | 0.003736176 |
| hsa_circ_0130895 | circRNA | -0.746885702 | 0.008676982 |
| GPX3             | mRNA    | -0.746951913 | 0.028155281 |
| ARHGEF26         | mRNA    | -0.747415741 | 0.013345112 |
| LIMCH1           | mRNA    | -0.747922611 | 0.020718445 |
| hsa_circ_0060203 | circRNA | -0.748118031 | 5.15E-04    |
| LOC101927752     | lncRNA  | -0.748204827 | 0.046373055 |
| SELENBP1         | mRNA    | -0.748384486 | 4.15E-04    |
| hsa_circ_0010673 | circRNA | -0.749773281 | 0.006830087 |
| hsa_circ_0005498 | circRNA | -0.749974275 | 0.03848726  |
| hsa_circ_0026518 | circRNA | -0.750027898 | 0.004656023 |
| ZNF596           | mRNA    | -0.750439541 | 0.002370888 |
| BGIG9606_45304   | lncRNA  | -0.750733453 | 0.006660353 |
| HMG3             | mRNA    | -0.751034652 | 0.009367111 |
| HOXD4            | mRNA    | -0.751697647 | 0.038433219 |
| FAM43A           | mRNA    | -0.752521085 | 0.002288278 |
| ANP32A           | mRNA    | -0.752564293 | 8.31E-05    |
| hsa_circ_0010587 | circRNA | -0.754533147 | 0.00405848  |
| HOXA6            | mRNA    | -0.754861129 | 0.026751008 |
| hsa_circ_0066296 | circRNA | -0.754899191 | 0.047559736 |
| hsa_circ_0058975 | circRNA | -0.755618919 | 0.00792487  |

|                  |         |              |             |
|------------------|---------|--------------|-------------|
| NR2F1-AS1        | lncRNA  | -0.755854509 | 0.041211347 |
| hsa_circ_0050276 | circRNA | -0.756768516 | 0.018578607 |
| STAB1            | mRNA    | -0.757170881 | 0.004234663 |
| hsa_circ_0088153 | circRNA | -0.757902332 | 4.75E-04    |
| AMOT             | mRNA    | -0.758022999 | 0.011492191 |
| hsa_circ_0051260 | circRNA | -0.758216988 | 0.004470026 |
| SMARCD3          | mRNA    | -0.758682573 | 0.003868597 |
| VWA5A            | mRNA    | -0.758966358 | 0.003331168 |
| RAB3IL1          | mRNA    | -0.760566724 | 1.66E-05    |
| hsa_circ_0134063 | circRNA | -0.761317141 | 0.046697884 |
| hsa_circ_0078303 | circRNA | -0.761536569 | 0.039072024 |
| hsa_circ_0015564 | circRNA | -0.761664388 | 0.046354475 |
| hsa_circ_0122926 | circRNA | -0.761771306 | 0.03642235  |
| hsa_circ_0010722 | circRNA | -0.762635334 | 0.00212471  |
| GPC2             | mRNA    | -0.762868993 | 0.029568482 |
| hsa_circ_0000354 | circRNA | -0.763961709 | 0.007548011 |
| hsa_circ_0010543 | circRNA | -0.765445596 | 5.73E-04    |
| DPP4             | mRNA    | -0.766989397 | 0.007370141 |
| PER2             | mRNA    | -0.766993568 | 1.66E-05    |
| SNED1            | mRNA    | -0.766998401 | 0.0012571   |
| hsa_circ_0019667 | circRNA | -0.767123161 | 7.90E-07    |
| hsa_circ_0112913 | circRNA | -0.767149337 | 0.028794643 |
| hsa_circ_0019670 | circRNA | -0.767568251 | 3.20E-06    |
| hsa_circ_0090998 | circRNA | -0.768170539 | 0.007322884 |
| C12orf75         | mRNA    | -0.769336056 | 0.019513347 |

|                  |         |              |             |
|------------------|---------|--------------|-------------|
| UAP1L1           | mRNA    | -0.770609147 | 3.95E-10    |
| KAZALD1          | mRNA    | -0.772186587 | 0.048638348 |
| hsa_circ_0103996 | circRNA | -0.77242871  | 0.030269568 |
| hsa_circ_0010588 | circRNA | -0.772439853 | 4.55E-04    |
| hsa_circ_0117976 | circRNA | -0.772460388 | 0.014440577 |
| HOXA3            | mRNA    | -0.772747412 | 0.00329005  |
| hsa_circ_0027603 | circRNA | -0.772898529 | 0.006056347 |
| ZBTB8A           | mRNA    | -0.772919197 | 5.19E-05    |
| hsa_circ_0070488 | circRNA | -0.77296257  | 0.006622995 |
| hsa_circ_0026492 | circRNA | -0.773006742 | 3.72E-07    |
| hsa_circ_0048052 | circRNA | -0.773508533 | 0.017145413 |
| LOC107984660     | lncRNA  | -0.774372549 | 0.039753254 |
| hsa_circ_0077072 | circRNA | -0.774623059 | 0.024228166 |
| hsa_circ_0010692 | circRNA | -0.778297677 | 0.002337427 |
| hsa_circ_0125865 | circRNA | -0.778371563 | 0.008847944 |
| MCCC1            | mRNA    | -0.778847353 | 2.90E-07    |
| SHC2             | mRNA    | -0.778964825 | 0.002280008 |
| hsa_circ_0010594 | circRNA | -0.779448038 | 9.73E-05    |
| FAM184A          | mRNA    | -0.779673082 | 0.037606746 |
| GAB3             | mRNA    | -0.780703693 | 8.55E-06    |
| hsa_circ_0066294 | circRNA | -0.780746901 | 0.023833786 |
| OTUD3            | mRNA    | -0.780858783 | 1.18E-04    |
| MVB12B           | mRNA    | -0.780954925 | 7.96E-06    |
| hsa_circ_0062754 | circRNA | -0.781101779 | 0.006573202 |
| SLC7A7           | mRNA    | -0.782114597 | 0.002650384 |

|                  |         |              |             |
|------------------|---------|--------------|-------------|
| OAZ2             | mRNA    | -0.78247997  | 7.18E-04    |
| BGIG9606_36118   | lncRNA  | -0.783244041 | 0.011494938 |
| CDCA7L           | mRNA    | -0.78401157  | 1.10E-05    |
| hsa_circ_0087325 | circRNA | -0.784426756 | 7.02E-04    |
| hsa_circ_0010564 | circRNA | -0.784571217 | 7.52E-05    |
| hsa_circ_0010723 | circRNA | -0.784820045 | 0.011111713 |
| hsa_circ_0115299 | circRNA | -0.7855561   | 0.010730695 |
| RNF208           | mRNA    | -0.785714138 | 0.001209727 |
| RHPN2            | mRNA    | -0.786967261 | 0.002309281 |
| TXNDC16          | mRNA    | -0.78766442  | 7.26E-09    |
| hsa_circ_0010778 | circRNA | -0.787916531 | 0.038848686 |
| hsa_circ_0076291 | circRNA | -0.788034291 | 0.024268523 |
| hsa_circ_0115320 | circRNA | -0.788225822 | 3.48E-04    |
| hsa_circ_0058977 | circRNA | -0.788924169 | 0.009301256 |
| USP53            | mRNA    | -0.78901004  | 2.49E-07    |
| SESN3            | mRNA    | -0.789395581 | 0.028919096 |
| LIAS             | mRNA    | -0.791100979 | 0.002699783 |
| FBLIM1           | mRNA    | -0.791119825 | 1.07E-04    |
| hsa_circ_0004931 | circRNA | -0.791420053 | 1.18E-05    |
| TSPY26P          | pseudo  | -0.792322563 | 5.39E-05    |
| hsa_circ_0008914 | circRNA | -0.792360375 | 0.005006995 |
| hsa_circ_0078302 | circRNA | -0.792381357 | 0.011012522 |
| LOC107987392     | lncRNA  | -0.79246117  | 0.005203441 |
| ETNK2            | mRNA    | -0.792808561 | 4.24E-06    |
| SLC9A9           | mRNA    | -0.793470484 | 8.73E-05    |

|                  |         |              |             |
|------------------|---------|--------------|-------------|
| DENND5B          | mRNA    | -0.793561899 | 1.68E-06    |
| hsa_circ_0010756 | circRNA | -0.794056068 | 0.033299767 |
| hsa_circ_0003964 | circRNA | -0.794752665 | 0.021138906 |
| hsa_circ_0010610 | circRNA | -0.794910744 | 4.21E-05    |
| hsa_circ_0092279 | circRNA | -0.794947831 | 0.005019517 |
| LOC105372401     | lncRNA  | -0.795416193 | 0.011830975 |
| hsa_circ_0136553 | circRNA | -0.795913045 | 0.028835095 |
| hsa_circ_0122916 | circRNA | -0.795933941 | 0.011985023 |
| NMNAT3           | mRNA    | -0.797439918 | 0.006998568 |
| hsa_circ_0056121 | circRNA | -0.798094479 | 0.012094299 |
| MYRIP            | mRNA    | -0.7981138   | 0.034572929 |
| hsa_circ_0072358 | circRNA | -0.798217029 | 0.019585377 |
| hsa_circ_0030839 | circRNA | -0.798565124 | 1.37E-04    |
| hsa_circ_0026517 | circRNA | -0.798954609 | 0.001158054 |
| CD200            | mRNA    | -0.800466883 | 0.034621156 |
| hsa_circ_0097618 | circRNA | -0.800532992 | 0.003139023 |
| hsa_circ_0077130 | circRNA | -0.800693228 | 0.023862771 |
| hsa_circ_0025476 | circRNA | -0.801907265 | 0.007455409 |
| DDIT4L           | mRNA    | -0.803004153 | 0.015490645 |
| PDCD4-AS1        | lncRNA  | -0.80314512  | 0.033081296 |
| hsa_circ_0054284 | circRNA | -0.803179566 | 7.46E-05    |
| hsa_circ_0026504 | circRNA | -0.803187357 | 1.50E-04    |
| hsa_circ_0128658 | circRNA | -0.803362122 | 0.031014981 |
| hsa_circ_0026533 | circRNA | -0.803713244 | 3.49E-09    |
| YPEL1            | mRNA    | -0.803875204 | 0.010808541 |

|                  |         |              |             |
|------------------|---------|--------------|-------------|
| hsa_circ_0010596 | circRNA | -0.80403265  | 0.021791097 |
| SAT2             | mRNA    | -0.804304657 | 9.54E-08    |
| hsa_circ_0010771 | circRNA | -0.804636833 | 0.001519666 |
| hsa_circ_0012758 | circRNA | -0.804714737 | 0.001707158 |
| hsa_circ_0124899 | circRNA | -0.805153125 | 0.002568731 |
| hsa_circ_0112548 | circRNA | -0.805264225 | 0.002365142 |
| hsa_circ_0085381 | circRNA | -0.805297908 | 0.039651275 |
| hsa_circ_0010143 | circRNA | -0.806043354 | 0.005637714 |
| DANCR            | lncRNA  | -0.80683896  | 6.19E-10    |
| C1QTNF4          | mRNA    | -0.80752708  | 0.00516974  |
| NUDT4            | mRNA    | -0.80766777  | 1.73E-05    |
| FZD2             | mRNA    | -0.807826677 | 0.00516974  |
| HCG11            | lncRNA  | -0.808194933 | 2.06E-04    |
| TIGD7            | mRNA    | -0.808527235 | 8.21E-06    |
| PGAP1            | mRNA    | -0.808743021 | 0.001569091 |
| hsa_circ_0062757 | circRNA | -0.809123693 | 3.52E-05    |
| TSGA10           | mRNA    | -0.809775213 | 0.00556318  |
| GSTM4            | mRNA    | -0.811145659 | 0.00382871  |
| hsa_circ_0015055 | circRNA | -0.812288931 | 0.003716906 |
| hsa_circ_0110195 | circRNA | -0.813595696 | 3.67E-06    |
| hsa_circ_0040622 | circRNA | -0.814265502 | 0.012921852 |
| hsa_circ_0137830 | circRNA | -0.814889571 | 0.04958186  |
| CDK19            | mRNA    | -0.814902543 | 5.31E-05    |
| hsa_circ_0029157 | circRNA | -0.815919369 | 0.039916954 |
| FRMD6            | mRNA    | -0.816284378 | 0.005282085 |

|                  |         |              |             |
|------------------|---------|--------------|-------------|
| MANBA            | mRNA    | -0.816364528 | 1.02E-07    |
| HERC2            | mRNA    | -0.81828345  | 0.019869217 |
| RPS6KA6          | mRNA    | -0.819068042 | 0.009561102 |
| LOC107984293     | lncRNA  | -0.81921925  | 0.001009221 |
| hsa_circ_0010740 | circRNA | -0.819327023 | 0.025915174 |
| hsa_circ_0117515 | circRNA | -0.819836426 | 0.019465849 |
| hsa_circ_0009407 | circRNA | -0.820401499 | 5.27E-04    |
| IL13RA1          | mRNA    | -0.820597608 | 5.95E-04    |
| hsa_circ_0080755 | circRNA | -0.820910488 | 4.13E-04    |
| FZD5             | mRNA    | -0.821640873 | 0.020218443 |
| YPEL2            | mRNA    | -0.822264156 | 0.01134317  |
| LOC101928570     | lncRNA  | -0.822449944 | 0.010392353 |
| hsa_circ_0015400 | circRNA | -0.822599625 | 0.00541829  |
| hsa_circ_0030842 | circRNA | -0.823207779 | 0.009520551 |
| hsa_circ_0090060 | circRNA | -0.823878164 | 0.002726843 |
| EFNB2            | mRNA    | -0.824006124 | 5.05E-05    |
| hsa_circ_0026523 | circRNA | -0.824256118 | 0.001404631 |
| hsa_circ_0057874 | circRNA | -0.824716294 | 4.28E-06    |
| hsa_circ_0125519 | circRNA | -0.824770143 | 0.001440697 |
| DHRS3            | mRNA    | -0.825243771 | 6.25E-04    |
| hsa_circ_0035844 | circRNA | -0.825555373 | 2.01E-04    |
| LOC105375304     | lncRNA  | -0.825595003 | 0.001032407 |
| ZC3HAV1          | mRNA    | -0.82578411  | 3.07E-04    |
| hsa_circ_0014156 | circRNA | -0.826381189 | 0.003334934 |
| hsa_circ_0024096 | circRNA | -0.82656486  | 3.74E-04    |



|                  |         |              |             |
|------------------|---------|--------------|-------------|
| hsa_circ_0081924 | circRNA | -0.827458167 | 8.41E-04    |
| REPS2            | mRNA    | -0.828105424 | 5.36E-05    |
| hsa_circ_0110977 | circRNA | -0.82907752  | 3.31E-05    |
| TMEM120A         | mRNA    | -0.829205519 | 1.05E-04    |
| hsa_circ_0010582 | circRNA | -0.829505481 | 0.043323806 |
| SPOCK1           | mRNA    | -0.829675529 | 0.025461186 |
| hsa_circ_0031835 | circRNA | -0.830158311 | 0.034106626 |
| hsa_circ_0099818 | circRNA | -0.830410788 | 0.008433191 |
| NSUN7            | mRNA    | -0.830711766 | 0.038769901 |
| hsa_circ_0020274 | circRNA | -0.830763357 | 0.033110565 |
| LOC107984974     | mRNA    | -0.830946666 | 0.010020892 |
| ROBO1            | mRNA    | -0.831195531 | 0.018594778 |
| STK33            | mRNA    | -0.831315593 | 0.004541713 |
| LOC100506804     | lncRNA  | -0.831837735 | 7.80E-04    |
| hsa_circ_0088610 | circRNA | -0.831838181 | 0.009652962 |
| hsa_circ_0026532 | circRNA | -0.831877371 | 0.001478924 |
| VPS37D           | mRNA    | -0.832051478 | 0.001422597 |
| hsa_circ_0069613 | circRNA | -0.832102561 | 0.04588573  |
| hsa_circ_0007889 | circRNA | -0.83225239  | 7.06E-11    |
| FLVCR2           | mRNA    | -0.832264231 | 0.002534385 |
| hsa_circ_0073363 | circRNA | -0.833725288 | 0.010466262 |
| hsa_circ_0004161 | circRNA | -0.835607515 | 0.013431524 |
| RUNX1T1          | mRNA    | -0.836161071 | 0.03099164  |
| hsa_circ_0006323 | circRNA | -0.83656273  | 0.014319667 |
| hsa_circ_0031908 | circRNA | -0.837443784 | 0.004742786 |

|                  |         |              |             |
|------------------|---------|--------------|-------------|
| PMEPA1           | mRNA    | -0.83860875  | 3.95E-05    |
| hsa_circ_0123086 | circRNA | -0.839001831 | 0.006385675 |
| hsa_circ_0010568 | circRNA | -0.839265772 | 0.003242139 |
| SOCS2-AS1        | lncRNA  | -0.839313759 | 0.008527411 |
| ZMYND8           | mRNA    | -0.839340175 | 1.73E-05    |
| hsa_circ_0026505 | circRNA | -0.841397077 | 2.05E-10    |
| RNF150           | mRNA    | -0.8418578   | 0.010080155 |
| NUDT4B           | mRNA    | -0.84277699  | 0.045716519 |
| hsa_circ_0055976 | circRNA | -0.842801355 | 2.86E-06    |
| SPOCD1           | mRNA    | -0.84303342  | 4.75E-04    |
| hsa_circ_0081907 | circRNA | -0.843066269 | 2.80E-04    |
| BGIG9606_37243   | lncRNA  | -0.843635808 | 0.024372654 |
| hsa_circ_0026516 | circRNA | -0.843756771 | 4.69E-09    |
| hsa_circ_0030852 | circRNA | -0.844194263 | 2.90E-06    |
| HES4             | mRNA    | -0.845445715 | 0.009974154 |
| GATA3-AS1        | lncRNA  | -0.846159722 | 0.002924838 |
| hsa_circ_0026496 | circRNA | -0.846575339 | 1.60E-12    |
| MEGF6            | mRNA    | -0.847149714 | 0.017399635 |
| hsa_circ_0066309 | circRNA | -0.847657005 | 0.039956745 |
| hsa_circ_0066568 | circRNA | -0.848823812 | 0.029511885 |
| LOC107987281     | lncRNA  | -0.849669526 | 0.033800393 |
| hsa_circ_0134066 | circRNA | -0.85001895  | 2.64E-05    |
| hsa_circ_0030773 | circRNA | -0.85086767  | 0.008622301 |
| hsa_circ_0049587 | circRNA | -0.851633168 | 0.023909895 |
| TFDP2            | mRNA    | -0.851668018 | 9.66E-07    |

|                  |         |              |             |
|------------------|---------|--------------|-------------|
| ADGRA2           | mRNA    | -0.852438589 | 3.63E-04    |
| SPNS2            | mRNA    | -0.853037509 | 0.02521476  |
| hsa_circ_0037943 | circRNA | -0.853908867 | 0.028187112 |
| IFI30            | mRNA    | -0.853982953 | 0.034708503 |
| hsa_circ_0010624 | circRNA | -0.854053446 | 3.48E-04    |
| hsa_circ_0113762 | circRNA | -0.854470908 | 1.66E-06    |
| hsa_circ_0063864 | circRNA | -0.854570694 | 0.023441384 |
| ERRFI1           | mRNA    | -0.855284176 | 0.00560686  |
| CCNG2            | mRNA    | -0.855798409 | 6.56E-07    |
| hsa_circ_0115305 | circRNA | -0.855966002 | 1.98E-04    |
| FBXO32           | mRNA    | -0.856790193 | 6.07E-05    |
| hsa_circ_0132899 | circRNA | -0.857407038 | 0.019237932 |
| F2RL1            | mRNA    | -0.857836253 | 1.30E-07    |
| hsa_circ_0044669 | circRNA | -0.858255439 | 0.024791425 |
| hsa_circ_0060596 | circRNA | -0.858590514 | 0.013662901 |
| hsa_circ_0031912 | circRNA | -0.860116043 | 0.011553426 |
| hsa_circ_0049736 | circRNA | -0.860330183 | 0.019402007 |
| FABP5            | mRNA    | -0.861084708 | 1.43E-05    |
| hsa_circ_0068550 | circRNA | -0.862584431 | 9.89E-05    |
| WWC2-AS2         | lncRNA  | -0.863203228 | 0.013826249 |
| EIF4B            | mRNA    | -0.864145228 | 2.23E-15    |
| ZSWIM5           | mRNA    | -0.864623382 | 6.85E-04    |
| hsa_circ_0081908 | circRNA | -0.865083244 | 0.013653071 |
| hsa_circ_0108089 | circRNA | -0.8652398   | 0.004850044 |
| BNC2             | mRNA    | -0.86564407  | 5.12E-04    |

|                  |         |              |             |
|------------------|---------|--------------|-------------|
| hsa_circ_0085444 | circRNA | -0.866838453 | 0.035224063 |
| hsa_circ_0045148 | circRNA | -0.866911044 | 0.004041322 |
| hsa_circ_0030772 | circRNA | -0.867420934 | 0.011755614 |
| hsa_circ_0093194 | circRNA | -0.867735496 | 0.005443429 |
| hsa_circ_0137993 | circRNA | -0.867795422 | 0.002741436 |
| MAN1C1           | mRNA    | -0.868925715 | 0.010814688 |
| TRO              | mRNA    | -0.869321877 | 5.69E-04    |
| JPH3             | mRNA    | -0.869577396 | 0.046807473 |
| LOC102723409     | lncRNA  | -0.869787069 | 0.006905957 |
| hsa_circ_0057338 | circRNA | -0.870040264 | 0.036751974 |
| TMEM86A          | mRNA    | -0.871460764 | 0.001422597 |
| hsa_circ_0062760 | circRNA | -0.871608846 | 9.02E-05    |
| ABLIM1           | mRNA    | -0.872411879 | 0.010657046 |
| hsa_circ_0026501 | circRNA | -0.872500249 | 4.64E-05    |
| hsa_circ_0044995 | circRNA | -0.872992175 | 0.037222014 |
| GLRB             | mRNA    | -0.87311432  | 3.49E-04    |
| hsa_circ_0077942 | circRNA | -0.873155971 | 3.70E-04    |
| PTPRD            | mRNA    | -0.873179781 | 7.89E-06    |
| hsa_circ_0010727 | circRNA | -0.873289471 | 5.05E-04    |
| hsa_circ_0109097 | circRNA | -0.875208617 | 1.31E-06    |
| hsa_circ_0026534 | circRNA | -0.875548042 | 5.94E-11    |
| SAMD13           | mRNA    | -0.875798753 | 2.85E-06    |
| ZNF423           | mRNA    | -0.876202514 | 5.80E-05    |
| hsa_circ_0130319 | circRNA | -0.876825636 | 0.041463218 |
| GSTM2            | mRNA    | -0.877087199 | 0.007080065 |

|                  |         |              |             |
|------------------|---------|--------------|-------------|
| hsa_circ_0010681 | circRNA | -0.8786712   | 3.00E-05    |
| hsa_circ_0089627 | circRNA | -0.879138662 | 0.008059849 |
| hsa_circ_0011173 | circRNA | -0.879421521 | 8.56E-05    |
| hsa_circ_0026499 | circRNA | -0.881097732 | 1.50E-05    |
| hsa_circ_0054272 | circRNA | -0.881640624 | 2.31E-05    |
| LINC00612        | lncRNA  | -0.882234629 | 0.048929647 |
| hsa_circ_0087881 | circRNA | -0.882860821 | 4.85E-06    |
| hsa_circ_0081916 | circRNA | -0.883595454 | 0.001517533 |
| hsa_circ_0115321 | circRNA | -0.884148869 | 0.014359458 |
| F8               | mRNA    | -0.884514179 | 0.004035592 |
| hsa_circ_0024423 | circRNA | -0.885715299 | 0.042416333 |
| hsa_circ_0010557 | circRNA | -0.885968939 | 7.36E-04    |
| hsa_circ_0081931 | circRNA | -0.886186934 | 1.97E-04    |
| hsa_circ_0130058 | circRNA | -0.886906466 | 7.37E-04    |
| NEK6             | mRNA    | -0.887455023 | 2.61E-11    |
| hsa_circ_0060622 | circRNA | -0.888187655 | 6.74E-06    |
| CAP2             | mRNA    | -0.888450321 | 0.001913237 |
| hsa_circ_0007024 | circRNA | -0.888714608 | 0.020338076 |
| ZNF702P          | pseudo  | -0.88888599  | 1.37E-05    |
| hsa_circ_0091397 | circRNA | -0.889031123 | 0.012356391 |
| hsa_circ_0095168 | circRNA | -0.889079415 | 0.03850288  |
| LOC100129034     | lncRNA  | -0.891160128 | 1.86E-08    |
| hsa_circ_0010571 | circRNA | -0.892254021 | 0.043450978 |
| TNFRSF12A        | mRNA    | -0.892825164 | 3.10E-05    |
| ECHDC2           | mRNA    | -0.893377569 | 0.019215018 |

|                  |         |              |             |
|------------------|---------|--------------|-------------|
| hsa_circ_0031907 | circRNA | -0.893443429 | 0.001961598 |
| EFNA1            | mRNA    | -0.89385123  | 2.83E-04    |
| hsa_circ_0041180 | circRNA | -0.894341818 | 1.04E-06    |
| ARMC4            | mRNA    | -0.894487386 | 0.022222186 |
| TNFSF4           | mRNA    | -0.894618388 | 2.83E-05    |
| hsa_circ_0081928 | circRNA | -0.895373742 | 2.22E-07    |
| hsa_circ_0115317 | circRNA | -0.89742276  | 6.69E-06    |
| hsa_circ_0010738 | circRNA | -0.898312765 | 0.003662344 |
| DMD              | mRNA    | -0.899311963 | 0.011166975 |
| NFIA             | mRNA    | -0.899332797 | 1.99E-06    |
| CHST1            | mRNA    | -0.899861427 | 6.95E-06    |
| hsa_circ_0010695 | circRNA | -0.900031629 | 0.026485668 |
| hsa_circ_0081942 | circRNA | -0.900592805 | 3.42E-04    |
| hsa_circ_0081943 | circRNA | -0.90066401  | 0.039552359 |
| VDR              | mRNA    | -0.900939996 | 0.020814313 |
| hsa_circ_0026497 | circRNA | -0.90135227  | 1.22E-04    |
| hsa_circ_0010721 | circRNA | -0.903069421 | 0.041662926 |
| hsa_circ_0010762 | circRNA | -0.903459496 | 2.83E-05    |
| hsa_circ_0130887 | circRNA | -0.903495797 | 0.008565436 |
| hsa_circ_0010567 | circRNA | -0.90376151  | 4.47E-04    |
| FIGN             | mRNA    | -0.903969708 | 2.56E-05    |
| hsa_circ_0066065 | circRNA | -0.904523524 | 0.021458675 |
| ZNF771           | mRNA    | -0.904586482 | 4.40E-15    |
| hsa_circ_0013259 | circRNA | -0.907921096 | 4.17E-04    |
| hsa_circ_0070533 | circRNA | -0.910728741 | 0.004591676 |

|                  |         |              |             |
|------------------|---------|--------------|-------------|
| hsa_circ_0002345 | circRNA | -0.910892864 | 1.32E-05    |
| hsa_circ_0026512 | circRNA | -0.911555233 | 5.32E-10    |
| hsa_circ_0004972 | circRNA | -0.91222235  | 6.66E-19    |
| hsa_circ_0007748 | circRNA | -0.914185183 | 0.009471121 |
| CA11             | mRNA    | -0.914868696 | 6.95E-06    |
| hsa_circ_0014154 | circRNA | -0.915071292 | 0.002259873 |
| CTNNAL1          | mRNA    | -0.915468453 | 1.73E-05    |
| hsa_circ_0010098 | circRNA | -0.915936052 | 8.89E-08    |
| SLC16A1-AS1      | lncRNA  | -0.916532268 | 0.049544865 |
| hsa_circ_0010682 | circRNA | -0.917711372 | 6.94E-04    |
| CNNM2            | mRNA    | -0.917880688 | 1.38E-06    |
| hsa_circ_0030837 | circRNA | -0.918459419 | 1.62E-06    |
| BGIG9606_51041   | mRNA    | -0.919078085 | 0.04949379  |
| DTX4             | mRNA    | -0.919762807 | 0.008701308 |
| LOC100506178     | lncRNA  | -0.919776273 | 0.018989286 |
| hsa_circ_0113761 | circRNA | -0.920283987 | 1.20E-06    |
| hsa_circ_0006955 | circRNA | -0.920331724 | 1.64E-07    |
| hsa_circ_0090059 | circRNA | -0.9219334   | 0.018779596 |
| SLC29A4          | mRNA    | -0.923023177 | 2.57E-04    |
| hsa_circ_0087442 | circRNA | -0.923390176 | 0.003443728 |
| RFX2             | mRNA    | -0.923414717 | 5.03E-04    |
| hsa_circ_0026500 | circRNA | -0.923454937 | 1.98E-05    |
| hsa_circ_0092666 | circRNA | -0.924730642 | 7.46E-05    |
| hsa_circ_0126168 | circRNA | -0.925561724 | 0.007028205 |
| FOSB             | mRNA    | -0.925633198 | 0.016207522 |

|                  |         |              |             |
|------------------|---------|--------------|-------------|
| HOMER3-AS1       | lncRNA  | -0.926185997 | 0.040653951 |
| hsa_circ_0129828 | circRNA | -0.926648694 | 0.046118005 |
| hsa_circ_0010683 | circRNA | -0.926720043 | 0.008870434 |
| SLC40A1          | mRNA    | -0.926852835 | 0.040785252 |
| hsa_circ_0115309 | circRNA | -0.927593844 | 0.030596158 |
| SPECC1           | mRNA    | -0.928514817 | 0.001451532 |
| LAMB1            | mRNA    | -0.928615083 | 3.82E-08    |
| CDKN1C           | mRNA    | -0.928771804 | 1.30E-05    |
| hsa_circ_0060606 | circRNA | -0.929273637 | 0.001600235 |
| LOC101927359     | lncRNA  | -0.930044641 | 0.035633316 |
| hsa_circ_0088485 | circRNA | -0.931801254 | 5.04E-06    |
| hsa_circ_0073399 | circRNA | -0.932158854 | 2.98E-04    |
| hsa_circ_0081927 | circRNA | -0.932459872 | 8.12E-07    |
| LOC107984805     | lncRNA  | -0.933149082 | 0.025527781 |
| hsa_circ_0006855 | circRNA | -0.933331314 | 5.83E-05    |
| hsa_circ_0007358 | circRNA | -0.934503526 | 0.014115704 |
| NAXE             | mRNA    | -0.935071724 | 4.11E-06    |
| hsa_circ_0026509 | circRNA | -0.935620231 | 8.99E-05    |
| hsa_circ_0067823 | circRNA | -0.93568508  | 0.00425103  |
| GCA              | mRNA    | -0.936933436 | 0.010905839 |
| hsa_circ_0102326 | circRNA | -0.938488388 | 0.001284497 |
| LOC101927692     | lncRNA  | -0.938795251 | 0.013278046 |
| IQCA1            | mRNA    | -0.938883379 | 0.005471176 |
| hsa_circ_0034319 | circRNA | -0.939601191 | 8.23E-04    |
| CRISPLD1         | mRNA    | -0.94020155  | 6.50E-04    |



|                  |         |              |             |
|------------------|---------|--------------|-------------|
| hsa_circ_0073398 | circRNA | -0.940495057 | 0.021918672 |
| hsa_circ_0026530 | circRNA | -0.940923677 | 0.015712013 |
| hsa_circ_0001790 | circRNA | -0.941007348 | 8.29E-07    |
| hsa_circ_0080752 | circRNA | -0.941262254 | 2.06E-10    |
| hsa_circ_0067991 | circRNA | -0.944512687 | 0.007424641 |
| hsa_circ_0081570 | circRNA | -0.944749888 | 0.006455003 |
| C1R              | mRNA    | -0.944827874 | 8.87E-05    |
| EIF4EBP3         | mRNA    | -0.945019052 | 0.031758786 |
| hsa_circ_0000834 | circRNA | -0.945098927 | 0.026728444 |
| NFATC4           | mRNA    | -0.945270868 | 0.002981567 |
| hsa_circ_0137998 | circRNA | -0.945390252 | 0.002811776 |
| FAM84B           | mRNA    | -0.945750111 | 0.007788755 |
| hsa_circ_0136473 | circRNA | -0.94651037  | 1.19E-05    |
| PIEZO2           | mRNA    | -0.946722119 | 0.001632451 |
| hsa_circ_0036032 | circRNA | -0.946780473 | 0.0142475   |
| CCDC146          | mRNA    | -0.947044165 | 0.039308226 |
| HMCN1            | mRNA    | -0.947264906 | 0.019010974 |
| hsa_circ_0014452 | circRNA | -0.948254106 | 1.29E-07    |
| hsa_circ_0026529 | circRNA | -0.948299729 | 1.01E-10    |
| hsa_circ_0026514 | circRNA | -0.948820066 | 4.52E-05    |
| LOC105375751     | lncRNA  | -0.949331865 | 0.00653406  |
| RAB30            | mRNA    | -0.949843485 | 1.54E-05    |
| TFPI             | mRNA    | -0.950377985 | 0.001208545 |
| CENPV            | mRNA    | -0.951191609 | 0.004355556 |
| CFH              | mRNA    | -0.951652734 | 2.35E-04    |

|                  |         |              |             |
|------------------|---------|--------------|-------------|
| KLHL4            | mRNA    | -0.95249248  | 6.20E-05    |
| TACSTD2          | mRNA    | -0.952719538 | 0.009608087 |
| hsa_circ_0026498 | circRNA | -0.952731572 | 5.00E-06    |
| hsa_circ_0002475 | circRNA | -0.953049062 | 0.003600469 |
| hsa_circ_0010559 | circRNA | -0.954155821 | 2.16E-04    |
| hsa_circ_0091395 | circRNA | -0.955780179 | 3.48E-05    |
| PWARSN           | lncRNA  | -0.956512201 | 1.15E-04    |
| GPR19            | mRNA    | -0.956818426 | 0.011166975 |
| LAPTM4B          | mRNA    | -0.956983276 | 0.001171346 |
| hsa_circ_0026531 | circRNA | -0.957721785 | 0.038984901 |
| hsa_circ_0115314 | circRNA | -0.957779685 | 2.15E-06    |
| hsa_circ_0098217 | circRNA | -0.95842355  | 0.016779082 |
| hsa_circ_0088486 | circRNA | -0.958619967 | 1.06E-05    |
| hsa_circ_0087882 | circRNA | -0.958832317 | 0.01887598  |
| hsa_circ_0026520 | circRNA | -0.958847437 | 2.02E-16    |
| hsa_circ_0130059 | circRNA | -0.959121856 | 7.03E-05    |
| hsa_circ_0086371 | circRNA | -0.959131264 | 0.049100487 |
| hsa_circ_0073002 | circRNA | -0.959671371 | 3.12E-05    |
| hsa_circ_0010763 | circRNA | -0.959775747 | 0.020295807 |
| SGK1             | mRNA    | -0.959892558 | 1.58E-04    |
| OTOGL            | mRNA    | -0.96001961  | 0.002514051 |
| hsa_circ_0091301 | circRNA | -0.960381112 | 0.001770782 |
| hsa_circ_0010100 | circRNA | -0.960653487 | 9.25E-08    |
| BGIG9606_44531   | lncRNA  | -0.961071412 | 0.018866827 |
| hsa_circ_0025822 | circRNA | -0.96333596  | 0.031892387 |

|                  |         |              |             |
|------------------|---------|--------------|-------------|
| hsa_circ_0118831 | circRNA | -0.963949879 | 0.02290569  |
| SOCS2            | mRNA    | -0.964095614 | 0.014860866 |
| TBX1             | mRNA    | -0.96422118  | 0.004355556 |
| hsa_circ_0088484 | circRNA | -0.965800081 | 9.23E-06    |
| CABLES1          | mRNA    | -0.966843247 | 1.48E-11    |
| hsa_circ_0106062 | circRNA | -0.967264331 | 0.042474019 |
| HERC2P9          | pseudo  | -0.968028141 | 0.018812867 |
| hsa_circ_0088494 | circRNA | -0.970011231 | 2.23E-08    |
| PRKACB           | mRNA    | -0.970590667 | 1.94E-12    |
| hsa_circ_0064631 | circRNA | -0.97391219  | 0.022045256 |
| hsa_circ_0008879 | circRNA | -0.974145466 | 4.93E-06    |
| hsa_circ_0134073 | circRNA | -0.975652468 | 0.027808718 |
| hsa_circ_0073402 | circRNA | -0.976058389 | 0.042136251 |
| hsa_circ_0056662 | circRNA | -0.976384803 | 0.047991411 |
| TLE2             | mRNA    | -0.97697032  | 1.25E-05    |
| PACSIN3          | mRNA    | -0.97711981  | 3.23E-15    |
| hsa_circ_0081939 | circRNA | -0.978579436 | 3.22E-06    |
| DNASE2           | mRNA    | -0.978710058 | 2.82E-12    |
| hsa_circ_0001952 | circRNA | -0.979011789 | 6.17E-04    |
| hsa_circ_0008176 | circRNA | -0.979905512 | 0.022993872 |
| hsa_circ_0077945 | circRNA | -0.980343684 | 6.15E-04    |
| hsa_circ_0057335 | circRNA | -0.981512138 | 1.51E-05    |
| BGIG9606_37320   | lncRNA  | -0.98157953  | 0.014231466 |
| hsa_circ_0097573 | circRNA | -0.981638734 | 0.022967161 |
| FOXC2            | mRNA    | -0.983007474 | 0.00106445  |

|                  |         |              |             |
|------------------|---------|--------------|-------------|
| hsa_circ_0026522 | circRNA | -0.983825367 | 7.88E-07    |
| hsa_circ_0091204 | circRNA | -0.984433796 | 3.71E-06    |
| hsa_circ_0060496 | circRNA | -0.984925181 | 1.60E-05    |
| hsa_circ_0069322 | circRNA | -0.985072969 | 4.64E-04    |
| hsa_circ_0087880 | circRNA | -0.986563453 | 8.11E-10    |
| GPRC5B           | mRNA    | -0.986669815 | 0.002651858 |
| hsa_circ_0026513 | circRNA | -0.987046862 | 4.38E-07    |
| LOXL1-AS1        | lncRNA  | -0.98822903  | 0.009873049 |
| hsa_circ_0066058 | circRNA | -0.988243577 | 8.75E-05    |
| BMF              | mRNA    | -0.988724751 | 0.015281913 |
| hsa_circ_0126427 | circRNA | -0.990012492 | 0.020150382 |
| hsa_circ_0108099 | circRNA | -0.990759625 | 0.012832231 |
| GKAP1            | mRNA    | -0.9915178   | 8.45E-05    |
| hsa_circ_0090870 | circRNA | -0.991742934 | 0.004514168 |
| hsa_circ_0078661 | circRNA | -0.991861878 | 0.018274245 |
| HSD3BP4          | pseudo  | -0.99206646  | 0.001153925 |
| MAST1            | mRNA    | -0.994390668 | 0.015408748 |
| TLCD2            | mRNA    | -0.994895682 | 2.81E-04    |
| CFAP69           | mRNA    | -0.995546736 | 2.43E-05    |
| hsa_circ_0088495 | circRNA | -0.995548797 | 5.47E-04    |
| hsa_circ_0003514 | circRNA | -0.99649318  | 0.015797859 |
| NLGN1            | mRNA    | -0.996782538 | 0.022118891 |
| hsa_circ_0010755 | circRNA | -0.997094893 | 0.002271902 |
| hsa_circ_0115310 | circRNA | -0.997674978 | 4.07E-07    |
| hsa_circ_0026503 | circRNA | -0.998617483 | 1.57E-06    |

|                  |         |              |             |
|------------------|---------|--------------|-------------|
| hsa_circ_0003214 | circRNA | -0.998908118 | 1.17E-07    |
| hsa_circ_0010698 | circRNA | -1.000813463 | 0.003457074 |
| NATD1            | mRNA    | -1.001989097 | 1.22E-04    |
| CETP             | mRNA    | -1.002555243 | 0.002538407 |
| SLC22A18         | mRNA    | -1.003120255 | 0.022788956 |
| LINC00607        | lncRNA  | -1.004908432 | 3.27E-09    |
| BGIG9606_44193   | mRNA    | -1.005214189 | 0.004039922 |
| TXNDC5           | mRNA    | -1.005942336 | 0.004755018 |
| hsa_circ_0027344 | circRNA | -1.007711265 | 0.001491688 |
| hsa_circ_0081940 | circRNA | -1.009447658 | 1.11E-05    |
| hsa_circ_0026506 | circRNA | -1.010864658 | 4.02E-08    |
| hsa_circ_0026508 | circRNA | -1.011310475 | 9.51E-07    |
| hsa_circ_0055924 | circRNA | -1.012126138 | 0.005413735 |
| CLIP3            | mRNA    | -1.012238377 | 2.02E-04    |
| hsa_circ_0122924 | circRNA | -1.013893306 | 0.008210695 |
| OR2A9P           | pseudo  | -1.01468487  | 0.003910034 |
| hsa_circ_0081917 | circRNA | -1.01478898  | 9.49E-05    |
| hsa_circ_0049046 | circRNA | -1.01529272  | 0.006271121 |
| hsa_circ_0122923 | circRNA | -1.015517974 | 0.003634918 |
| hsa_circ_0075594 | circRNA | -1.0164823   | 0.036751974 |
| LOC100129940     | lncRNA  | -1.016722543 | 4.51E-04    |
| hsa_circ_0088492 | circRNA | -1.017682639 | 3.03E-10    |
| hsa_circ_0080754 | circRNA | -1.019441954 | 2.64E-04    |
| hsa_circ_0113747 | circRNA | -1.020620843 | 2.11E-04    |
| MIR100HG         | lncRNA  | -1.020662903 | 3.07E-12    |

|                  |         |              |             |
|------------------|---------|--------------|-------------|
| ITGA11           | mRNA    | -1.020962756 | 0.009720561 |
| MLLT3            | mRNA    | -1.02172152  | 2.21E-07    |
| ANKRD53          | mRNA    | -1.022334273 | 0.007580016 |
| hsa_circ_0081919 | circRNA | -1.024582723 | 2.68E-10    |
| hsa_circ_0026511 | circRNA | -1.026748278 | 0.003233767 |
| BGIG9606_50074   | lncRNA  | -1.027657541 | 0.044570768 |
| SELL             | mRNA    | -1.028530742 | 0.007367588 |
| CXCL1            | mRNA    | -1.030860237 | 0.012916479 |
| SLC45A4          | mRNA    | -1.031420339 | 9.51E-08    |
| hsa_circ_0075900 | circRNA | -1.032273865 | 0.00128504  |
| hsa_circ_0025703 | circRNA | -1.032320541 | 0.045828441 |
| VWA1             | mRNA    | -1.032355194 | 3.30E-04    |
| hsa_circ_0060624 | circRNA | -1.032556814 | 4.02E-05    |
| hsa_circ_0076299 | circRNA | -1.032845256 | 0.001050585 |
| hsa_circ_0004864 | circRNA | -1.033196476 | 5.47E-09    |
| hsa_circ_0010023 | circRNA | -1.033409303 | 1.86E-06    |
| hsa_circ_0115322 | circRNA | -1.033878513 | 7.67E-05    |
| KCNT2            | mRNA    | -1.035106034 | 0.005527192 |
| hsa_circ_0089955 | circRNA | -1.035826233 | 0.004807319 |
| hsa_circ_0014768 | circRNA | -1.036813734 | 2.53E-09    |
| hsa_circ_0003085 | circRNA | -1.037132561 | 0.019899479 |
| hsa_circ_0118484 | circRNA | -1.037557159 | 0.015368585 |
| NR2F1            | mRNA    | -1.037744761 | 0.00240338  |
| HAPLN3           | mRNA    | -1.038264715 | 6.88E-05    |
| FGF2             | mRNA    | -1.03985608  | 0.032755374 |

|                  |         |              |             |
|------------------|---------|--------------|-------------|
| hsa_circ_0081911 | circRNA | -1.04042891  | 2.98E-06    |
| DSEL             | mRNA    | -1.040581762 | 0.001091443 |
| hsa_circ_0110378 | circRNA | -1.041350099 | 4.13E-04    |
| ITGB8            | mRNA    | -1.04224348  | 0.002920754 |
| CADM1            | mRNA    | -1.042459156 | 0.001396811 |
| SYN2             | mRNA    | -1.042661088 | 0.028864926 |
| CELSR2           | mRNA    | -1.042910821 | 2.12E-09    |
| CCZ1P-OR7E38P    | pseudo  | -1.043442325 | 5.54E-04    |
| hsa_circ_0081937 | circRNA | -1.043476701 | 3.52E-05    |
| HMGA2            | mRNA    | -1.044924155 | 1.62E-08    |
| LRIG3            | mRNA    | -1.044977291 | 0.004994351 |
| KAT7             | mRNA    | -1.048388845 | 6.61E-04    |
| GATA3            | mRNA    | -1.048975425 | 0.005967476 |
| hsa_circ_0137997 | circRNA | -1.049778036 | 2.55E-04    |
| hsa_circ_0081932 | circRNA | -1.051940702 | 3.38E-06    |
| hsa_circ_0026507 | circRNA | -1.052326542 | 1.04E-07    |
| MTMR10           | mRNA    | -1.052906679 | 4.65E-06    |
| hsa_circ_0075595 | circRNA | -1.05295148  | 0.025919002 |
| PURG             | mRNA    | -1.053270333 | 5.51E-06    |
| KLHL13           | mRNA    | -1.053997383 | 2.12E-05    |
| CEACAM1          | mRNA    | -1.055055652 | 0.034775931 |
| FBN2             | mRNA    | -1.056074931 | 1.96E-11    |
| HSD17B14         | mRNA    | -1.056122455 | 8.63E-13    |
| ZFHX4            | mRNA    | -1.056639767 | 0.026090631 |
| hsa_circ_0131149 | circRNA | -1.056967947 | 0.044480223 |

|                  |         |              |             |
|------------------|---------|--------------|-------------|
| SLC44A3-AS1      | lncRNA  | -1.057338892 | 0.02911009  |
| hsa_circ_0070899 | circRNA | -1.057881048 | 0.001296542 |
| hsa_circ_0021121 | circRNA | -1.057936087 | 0.036215403 |
| ADGRG6           | mRNA    | -1.058938039 | 0.032727052 |
| hsa_circ_0115313 | circRNA | -1.060144243 | 0.024218339 |
| BGIG9606_49735   | lncRNA  | -1.060534401 | 0.04579236  |
| hsa_circ_0006243 | circRNA | -1.061458448 | 0.015442499 |
| SRRM3            | mRNA    | -1.061767987 | 6.14E-06    |
| TEF              | mRNA    | -1.062925044 | 3.19E-05    |
| hsa_circ_0002591 | circRNA | -1.063140962 | 3.17E-06    |
| ACKR4            | mRNA    | -1.063811637 | 0.002555327 |
| hsa_circ_0075591 | circRNA | -1.065109151 | 0.021421495 |
| GAPLINC          | lncRNA  | -1.066322423 | 1.02E-04    |
| MCTP1            | mRNA    | -1.066363171 | 5.58E-04    |
| HERC2P3          | pseudo  | -1.066540121 | 0.006969086 |
| HSBP1L1          | mRNA    | -1.069934686 | 6.82E-07    |
| hsa_circ_0100870 | circRNA | -1.070300738 | 0.022924171 |
| HPSE             | mRNA    | -1.070614658 | 1.60E-04    |
| hsa_circ_0102869 | circRNA | -1.070618544 | 0.027496654 |
| hsa_circ_0098379 | circRNA | -1.071136918 | 0.025335459 |
| hsa_circ_0081935 | circRNA | -1.071215372 | 4.24E-06    |
| hsa_circ_0137996 | circRNA | -1.071622166 | 0.004516418 |
| USP2             | mRNA    | -1.071776821 | 0.003994223 |
| hsa_circ_0057525 | circRNA | -1.074078605 | 0.028838591 |
| hsa_circ_0018007 | circRNA | -1.074938815 | 0.025919002 |



|                  |         |              |             |
|------------------|---------|--------------|-------------|
| BGIG9606_51023   | lncRNA  | -1.075691549 | 1.25E-05    |
| hsa_circ_0018184 | circRNA | -1.075892924 | 0.001865749 |
| FOXRED2          | mRNA    | -1.076224497 | 4.62E-15    |
| SATB1            | mRNA    | -1.076241979 | 2.49E-07    |
| PRICKLE2         | mRNA    | -1.076904839 | 0.011231437 |
| TNFRSF10D        | mRNA    | -1.077363959 | 3.51E-06    |
| hsa_circ_0010726 | circRNA | -1.078429461 | 0.003402305 |
| ZNF853           | mRNA    | -1.079002255 | 6.66E-04    |
| hsa_circ_0114593 | circRNA | -1.079003283 | 5.01E-05    |
| BGIG9606_47663   | lncRNA  | -1.079910174 | 0.023336167 |
| FHIT             | mRNA    | -1.080234869 | 6.22E-06    |
| ODF3B            | mRNA    | -1.080329285 | 0.006553755 |
| hsa_circ_0070536 | circRNA | -1.080480166 | 0.007083612 |
| PCDH18           | mRNA    | -1.081188109 | 1.50E-08    |
| hsa_circ_0060803 | circRNA | -1.085609828 | 0.002784227 |
| FLRT2            | mRNA    | -1.085964229 | 2.98E-05    |
| NAALAD2          | mRNA    | -1.086006201 | 0.001607288 |
| ARHGEF5          | mRNA    | -1.086823421 | 0.004885936 |
| CERNA1           | lncRNA  | -1.088311792 | 0.040547917 |
| SLC44A3          | mRNA    | -1.088809927 | 0.002510067 |
| SLIT2            | mRNA    | -1.089621589 | 0.002161888 |
| hsa_circ_0060802 | circRNA | -1.090004209 | 2.56E-04    |
| hsa_circ_0093670 | circRNA | -1.090035253 | 0.034843649 |
| hsa_circ_0067186 | circRNA | -1.090290935 | 0.001053014 |
| hsa_circ_0026502 | circRNA | -1.090702377 | 5.62E-11    |

|                  |         |              |             |
|------------------|---------|--------------|-------------|
| hsa_circ_0070776 | circRNA | -1.091854343 | 6.24E-05    |
| hsa_circ_0124695 | circRNA | -1.092144561 | 0.006640786 |
| hsa_circ_0080757 | circRNA | -1.092219855 | 0.003970736 |
| SEPT5            | mRNA    | -1.092810231 | 3.91E-04    |
| MME              | mRNA    | -1.093067205 | 8.70E-05    |
| hsa_circ_0009402 | circRNA | -1.093577834 | 1.22E-06    |
| BGIG9606_45850   | mRNA    | -1.093922539 | 0.045702171 |
| FABP4            | mRNA    | -1.094493078 | 0.009152973 |
| CTSF             | mRNA    | -1.094632421 | 1.49E-04    |
| hsa_circ_0115298 | circRNA | -1.094780284 | 0.01126407  |
| PCDHGB1          | mRNA    | -1.095462782 | 0.016518873 |
| ANGPTL4          | mRNA    | -1.096607093 | 0.003770202 |
| hsa_circ_0012759 | circRNA | -1.09739608  | 4.44E-10    |
| hsa_circ_0073396 | circRNA | -1.09763937  | 8.75E-05    |
| hsa_circ_0102749 | circRNA | -1.098565333 | 3.77E-07    |
| PCOLCE           | mRNA    | -1.100299937 | 0.003994223 |
| hsa_circ_0034031 | circRNA | -1.100665999 | 7.02E-04    |
| hsa_circ_0121459 | circRNA | -1.101114864 | 0.00556922  |
| LOC107984993     | lncRNA  | -1.101759123 | 0.033522495 |
| hsa_circ_0073360 | circRNA | -1.101833027 | 0.0173046   |
| RTL5             | mRNA    | -1.103499214 | 0.010853037 |
| KCNQ1            | mRNA    | -1.10443829  | 0.042478545 |
| MAP2K6           | mRNA    | -1.104609902 | 0.001611773 |
| CAVIN2           | mRNA    | -1.106429553 | 0.003068514 |
| RASL10B          | mRNA    | -1.1077163   | 0.008650309 |

|                  |         |              |             |
|------------------|---------|--------------|-------------|
| TNIK             | mRNA    | -1.109487475 | 2.16E-06    |
| hsa_circ_0081918 | circRNA | -1.109509226 | 1.59E-04    |
| hsa_circ_0081934 | circRNA | -1.109584898 | 8.95E-04    |
| LINC01614        | lncRNA  | -1.10964212  | 0.013066529 |
| hsa_circ_0086488 | circRNA | -1.112500571 | 7.56E-04    |
| IL33             | mRNA    | -1.113421182 | 0.012332966 |
| hsa_circ_0042034 | circRNA | -1.113568605 | 0.029294723 |
| hsa_circ_0010020 | circRNA | -1.113937359 | 2.31E-08    |
| hsa_circ_0031911 | circRNA | -1.114061315 | 0.034890377 |
| hsa_circ_0075698 | circRNA | -1.116950693 | 0.013598665 |
| AMPH             | mRNA    | -1.118411061 | 0.004892736 |
| BDH1             | mRNA    | -1.118505806 | 2.23E-05    |
| LINC00641        | lncRNA  | -1.118976317 | 1.28E-09    |
| DPF3             | mRNA    | -1.119462152 | 0.001974651 |
| hsa_circ_0103279 | circRNA | -1.120250842 | 1.74E-06    |
| hsa_circ_0042039 | circRNA | -1.120426403 | 0.013975789 |
| LOXL4            | mRNA    | -1.122762409 | 0.004642327 |
| hsa_circ_0026510 | circRNA | -1.123201714 | 3.42E-13    |
| EPB41L1          | mRNA    | -1.124541943 | 3.95E-05    |
| hsa_circ_0088614 | circRNA | -1.124766773 | 0.001503071 |
| ATOH8            | mRNA    | -1.124983939 | 0.015408748 |
| MAPK8IP2         | mRNA    | -1.126332178 | 0.003000726 |
| HERC2P2          | pseudo  | -1.126831164 | 0.003303203 |
| ADGRF5           | mRNA    | -1.128888082 | 1.60E-10    |
| TENM3            | mRNA    | -1.128962791 | 0.012318438 |

|                  |         |              |             |
|------------------|---------|--------------|-------------|
| SNAP25           | mRNA    | -1.12998281  | 0.044191528 |
| hsa_circ_0035615 | circRNA | -1.131841967 | 0.01245731  |
| hsa_circ_0000784 | circRNA | -1.133223538 | 0.026396501 |
| hsa_circ_0026494 | circRNA | -1.133445215 | 4.42E-04    |
| MYZAP            | mRNA    | -1.134160124 | 0.014734086 |
| PTGIS            | mRNA    | -1.135899941 | 1.16E-10    |
| C17orf58         | mRNA    | -1.136324084 | 6.34E-04    |
| hsa_circ_0070509 | circRNA | -1.136980412 | 0.002523192 |
| hsa_circ_0004526 | circRNA | -1.137620973 | 0.00227482  |
| NREP             | mRNA    | -1.140112457 | 7.33E-08    |
| ZNF610           | mRNA    | -1.140394429 | 0.004154077 |
| WDFY4            | mRNA    | -1.141099084 | 2.39E-04    |
| LOC105372141     | lncRNA  | -1.141186206 | 0.024693566 |
| hsa_circ_0087600 | circRNA | -1.141720812 | 0.001751642 |
| BGIG9606_49048   | lncRNA  | -1.143165363 | 3.72E-04    |
| CADM4            | mRNA    | -1.144018553 | 2.59E-04    |
| hsa_circ_0004742 | circRNA | -1.144211821 | 0.002392478 |
| hsa_circ_0034316 | circRNA | -1.144927565 | 9.81E-07    |
| ZNF641           | mRNA    | -1.146097722 | 0.034470492 |
| STARD4-AS1       | lncRNA  | -1.14703503  | 2.91E-06    |
| LOC101929710     | lncRNA  | -1.149785666 | 1.35E-04    |
| hsa_circ_0040626 | circRNA | -1.150313812 | 0.001671101 |
| LOC401021        | lncRNA  | -1.150457308 | 5.46E-04    |
| MMP28            | mRNA    | -1.152258022 | 0.003789113 |
| hsa_circ_0091401 | circRNA | -1.153763064 | 0.026324187 |

|                  |         |              |             |
|------------------|---------|--------------|-------------|
| hsa_circ_0030862 | circRNA | -1.15414574  | 0.002851506 |
| hsa_circ_0098358 | circRNA | -1.154214231 | 0.003457074 |
| DNMBP-AS1        | lncRNA  | -1.156458352 | 1.62E-04    |
| hsa_circ_0126452 | circRNA | -1.158436022 | 0.042402524 |
| CERS4            | mRNA    | -1.158809584 | 6.11E-12    |
| SALL2            | mRNA    | -1.159141403 | 1.07E-08    |
| NAV3             | mRNA    | -1.159954334 | 1.60E-08    |
| hsa_circ_0010167 | circRNA | -1.162611619 | 0.003603997 |
| GDF1             | mRNA    | -1.164362511 | 0.004810528 |
| BGIG9606_39478   | lncRNA  | -1.166018784 | 0.035909074 |
| ACSF2            | mRNA    | -1.166509859 | 6.75E-08    |
| hsa_circ_0057534 | circRNA | -1.168562434 | 0.008534426 |
| hsa_circ_0003173 | circRNA | -1.168909842 | 0.005601453 |
| FRMD5            | mRNA    | -1.169661135 | 6.18E-05    |
| hsa_circ_0133100 | circRNA | -1.169806466 | 2.64E-04    |
| BMPER            | mRNA    | -1.169898142 | 0.002250206 |
| NR6A1            | mRNA    | -1.170870191 | 1.96E-05    |
| BASP1            | mRNA    | -1.172189038 | 1.83E-07    |
| hsa_circ_0122919 | circRNA | -1.175635293 | 0.008913798 |
| PLSCR4           | mRNA    | -1.177243159 | 0.00106445  |
| PHYHD1           | mRNA    | -1.178908389 | 0.034043983 |
| LOC102724951     | mRNA    | -1.180218704 | 0.031316038 |
| HAAO             | mRNA    | -1.182214778 | 0.009825601 |
| THSD7A           | mRNA    | -1.183851024 | 3.90E-04    |
| ABCA6            | mRNA    | -1.184118127 | 0.004921482 |

|                  |         |              |             |
|------------------|---------|--------------|-------------|
| SV2C             | mRNA    | -1.189682678 | 0.001644857 |
| hsa_circ_0088482 | circRNA | -1.191798197 | 0.008899928 |
| ZNF204P          | pseudo  | -1.192207217 | 0.009882797 |
| hsa_circ_0015758 | circRNA | -1.192326824 | 2.12E-06    |
| DNM1             | mRNA    | -1.192530435 | 0.005290707 |
| hsa_circ_0055927 | circRNA | -1.193191457 | 1.70E-10    |
| DKK3             | mRNA    | -1.194683701 | 1.11E-04    |
| hsa_circ_0083940 | circRNA | -1.19779612  | 7.44E-08    |
| PLAGL1           | mRNA    | -1.198723657 | 0.002875642 |
| FHL2             | mRNA    | -1.199858982 | 1.72E-11    |
| hsa_circ_0073390 | circRNA | -1.200056208 | 7.30E-04    |
| hsa_circ_0130056 | circRNA | -1.201095469 | 0.001491688 |
| hsa_circ_0081929 | circRNA | -1.201687073 | 9.11E-09    |
| LOC107985371     | lncRNA  | -1.201898532 | 0.045883622 |
| hsa_circ_0116397 | circRNA | -1.20211626  | 0.01389951  |
| hsa_circ_0010092 | circRNA | -1.204107531 | 2.06E-05    |
| RNF152           | mRNA    | -1.204489991 | 3.68E-06    |
| hsa_circ_0137166 | circRNA | -1.204656493 | 0.002251795 |
| IER3-AS1         | lncRNA  | -1.206200422 | 0.001360082 |
| SLC16A5          | mRNA    | -1.207800643 | 2.28E-09    |
| hsa_circ_0133102 | circRNA | -1.208103502 | 0.001213183 |
| LOC102724861     | lncRNA  | -1.210329016 | 0.004739501 |
| NR1H3            | mRNA    | -1.211269943 | 2.64E-05    |
| AR               | mRNA    | -1.214935422 | 5.37E-04    |
| TMED10P1         | pseudo  | -1.215797462 | 0.013721788 |

|                  |         |              |             |
|------------------|---------|--------------|-------------|
| NHLRC4           | mRNA    | -1.217867207 | 0.001885546 |
| LDLRAD4-AS1      | lncRNA  | -1.218083649 | 0.003704866 |
| CAMK2N1          | mRNA    | -1.218447482 | 0.001039851 |
| hsa_circ_0026525 | circRNA | -1.221242862 | 1.22E-08    |
| hsa_circ_0006053 | circRNA | -1.22196171  | 0.001128955 |
| hsa_circ_0073397 | circRNA | -1.22262644  | 0.007149407 |
| hsa_circ_0114631 | circRNA | -1.222792526 | 0.001738762 |
| LOC102724397     | lncRNA  | -1.224035833 | 2.54E-05    |
| SSSCA1-AS1       | lncRNA  | -1.224992805 | 0.00415635  |
| hsa_circ_0057536 | circRNA | -1.225617368 | 0.008913798 |
| ACOX2            | mRNA    | -1.226082434 | 4.92E-06    |
| hsa_circ_0122712 | circRNA | -1.226561467 | 3.37E-05    |
| IL11RA           | mRNA    | -1.227879663 | 6.33E-05    |
| PLOD2            | mRNA    | -1.2291363   | 2.85E-15    |
| hsa_circ_0007901 | circRNA | -1.229702147 | 0.012925034 |
| HOXD3            | mRNA    | -1.231231056 | 0.004236388 |
| hsa_circ_0079445 | circRNA | -1.231320723 | 0.047934229 |
| LINC00987        | lncRNA  | -1.233052179 | 0.036402101 |
| HOXA10           | mRNA    | -1.234480156 | 1.17E-10    |
| LOC102723665     | lncRNA  | -1.235336274 | 0.036678157 |
| hsa_circ_0116524 | circRNA | -1.23544124  | 1.36E-04    |
| hsa_circ_0088481 | circRNA | -1.235643594 | 0.010462737 |
| DCAF12L2         | mRNA    | -1.241525446 | 0.028670457 |
| BCL11A           | mRNA    | -1.246032681 | 0.032688761 |
| hsa_circ_0044589 | circRNA | -1.246769515 | 1.14E-05    |

|                  |         |              |             |
|------------------|---------|--------------|-------------|
| TNFSF10          | mRNA    | -1.247598012 | 2.87E-04    |
| HYI              | mRNA    | -1.248968612 | 5.47E-04    |
| hsa_circ_0042046 | circRNA | -1.249922068 | 0.02657136  |
| hsa_circ_0034318 | circRNA | -1.251533871 | 6.66E-08    |
| BGIG9606_51212   | lncRNA  | -1.252462855 | 0.00145404  |
| APLN             | mRNA    | -1.252525123 | 0.017115223 |
| FAXDC2           | mRNA    | -1.253228586 | 1.35E-05    |
| ALDH6A1          | mRNA    | -1.254389899 | 6.76E-04    |
| MYH10            | mRNA    | -1.25439477  | 0.002128313 |
| RPSAP52          | pseudo  | -1.255044025 | 3.30E-07    |
| hsa_circ_0013444 | circRNA | -1.25659235  | 1.14E-07    |
| NANOS3           | mRNA    | -1.257016747 | 0.00737943  |
| hsa_circ_0008417 | circRNA | -1.258131765 | 7.29E-08    |
| hsa_circ_0073389 | circRNA | -1.258292855 | 3.10E-04    |
| hsa_circ_0055925 | circRNA | -1.258342974 | 1.72E-09    |
| SORT1            | mRNA    | -1.260822696 | 1.73E-11    |
| hsa_circ_0062273 | circRNA | -1.261594942 | 0.040734076 |
| PAIP2B           | mRNA    | -1.264091948 | 1.75E-04    |
| hsa_circ_0122709 | circRNA | -1.265517382 | 0.001898004 |
| NALCN            | mRNA    | -1.266288394 | 3.00E-04    |
| SAMD12           | mRNA    | -1.266883336 | 0.001517688 |
| hsa_circ_0118413 | circRNA | -1.267407314 | 4.07E-07    |
| STAT1            | mRNA    | -1.267990782 | 2.85E-10    |
| hsa_circ_0008383 | circRNA | -1.271291552 | 3.21E-04    |
| NDRG2            | mRNA    | -1.273402199 | 0.002287099 |



|                  |         |              |             |
|------------------|---------|--------------|-------------|
| hsa_circ_0003324 | circRNA | -1.274991352 | 6.45E-05    |
| hsa_circ_0050674 | circRNA | -1.27506555  | 1.24E-04    |
| RPS6KA5          | mRNA    | -1.275819389 | 5.79E-06    |
| hsa_circ_0107814 | circRNA | -1.277932496 | 0.032865795 |
| hsa_circ_0039468 | circRNA | -1.278846018 | 0.025925407 |
| BGIG9606_36247   | lncRNA  | -1.280510208 | 0.028152426 |
| PLEKHB1          | mRNA    | -1.281215307 | 3.81E-04    |
| DPY19L2          | mRNA    | -1.283090035 | 0.004246175 |
| PPP1R3C          | mRNA    | -1.283228712 | 0.002747159 |
| hsa_circ_0049043 | circRNA | -1.28464051  | 2.84E-06    |
| hsa_circ_0021959 | circRNA | -1.286037043 | 0.001271691 |
| hsa_circ_0108146 | circRNA | -1.287629472 | 0.007207706 |
| hsa_circ_0091393 | circRNA | -1.287670324 | 1.91E-05    |
| GSDMC            | mRNA    | -1.288828645 | 0.005151475 |
| hsa_circ_0107829 | circRNA | -1.290615021 | 0.021027882 |
| SCGB3A1          | mRNA    | -1.29287447  | 0.011672681 |
| N4BP2L1          | mRNA    | -1.295231617 | 3.69E-05    |
| ZNF704           | mRNA    | -1.29531462  | 8.50E-07    |
| hsa_circ_0139056 | circRNA | -1.295890897 | 0.003132356 |
| hsa_circ_0080753 | circRNA | -1.296568298 | 0.005325859 |
| hsa_circ_0107813 | circRNA | -1.297457803 | 0.039651275 |
| hsa_circ_0021281 | circRNA | -1.297883436 | 0.003032166 |
| hsa_circ_0119102 | circRNA | -1.299220759 | 4.15E-06    |
| hsa_circ_0025654 | circRNA | -1.302856248 | 0.015013211 |
| hsa_circ_0134195 | circRNA | -1.304331365 | 0.046422838 |

|                  |         |              |             |
|------------------|---------|--------------|-------------|
| hsa_circ_0013438 | circRNA | -1.304684564 | 0.01482385  |
| hsa_circ_0048053 | circRNA | -1.306152626 | 1.60E-04    |
| MFAP2            | mRNA    | -1.307021989 | 7.94E-06    |
| hsa_circ_0040621 | circRNA | -1.309267527 | 5.54E-04    |
| hsa_circ_0110387 | circRNA | -1.311648003 | 1.45E-07    |
| hsa_circ_0122212 | circRNA | -1.311722231 | 7.60E-04    |
| ANGPT2           | mRNA    | -1.3146801   | 0.008260595 |
| PRRX1            | mRNA    | -1.316172402 | 0.012334526 |
| EFNB3            | mRNA    | -1.318746228 | 0.029392664 |
| hsa_circ_0110388 | circRNA | -1.322457011 | 9.95E-08    |
| SMPDL3B          | mRNA    | -1.322919932 | 0.002058453 |
| LOC102724081     | lncRNA  | -1.324094559 | 4.77E-04    |
| hsa_circ_0013441 | circRNA | -1.327503373 | 1.77E-07    |
| LMNTD2           | mRNA    | -1.330883403 | 0.00158213  |
| hsa_circ_0010170 | circRNA | -1.332052278 | 3.48E-04    |
| 105370045        | mRNA    | -1.334278798 | 0.020620262 |
| hsa_circ_0105713 | circRNA | -1.334554455 | 8.40E-04    |
| APCDD1           | mRNA    | -1.335517341 | 0.003862935 |
| hsa_circ_0110400 | circRNA | -1.335822416 | 7.03E-05    |
| PTTG1            | mRNA    | -1.335940894 | 0.02397727  |
| C3orf86          | mRNA    | -1.336123093 | 0.035055121 |
| hsa_circ_0130055 | circRNA | -1.336948279 | 0.001763303 |
| hsa_circ_0034531 | circRNA | -1.33784465  | 0.016570356 |
| KSR2             | mRNA    | -1.338332827 | 0.003645704 |
| CDK18            | mRNA    | -1.338745487 | 0.045254572 |

|                  |         |              |             |
|------------------|---------|--------------|-------------|
| SAT1             | mRNA    | -1.339471251 | 1.67E-10    |
| hsa_circ_0069310 | circRNA | -1.339998481 | 0.045440267 |
| SGIP1            | mRNA    | -1.342738137 | 1.59E-06    |
| SCUBE2           | mRNA    | -1.343056477 | 0.035104391 |
| hsa_circ_0043136 | circRNA | -1.343780137 | 2.90E-04    |
| CEMP1            | mRNA    | -1.344075934 | 0.001753985 |
| NHS              | mRNA    | -1.348296457 | 8.46E-04    |
| BGIG9606_54927   | mRNA    | -1.349468898 | 0.005282249 |
| hsa_circ_0107830 | circRNA | -1.356377878 | 0.023628643 |
| BGIG9606_45673   | lncRNA  | -1.357631983 | 0.026803928 |
| C15orf54         | lncRNA  | -1.359025856 | 9.36E-09    |
| ABCA9            | mRNA    | -1.366509471 | 0.00244785  |
| ENPP2            | mRNA    | -1.366846282 | 7.19E-08    |
| BEND5            | mRNA    | -1.366913232 | 0.003710802 |
| hsa_circ_0013433 | circRNA | -1.370328125 | 4.40E-09    |
| ADAMTS9-AS2      | lncRNA  | -1.370936514 | 6.91E-04    |
| SHF              | mRNA    | -1.373273863 | 8.81E-07    |
| BGIG9606_51325   | mRNA    | -1.374872746 | 0.006905957 |
| PLS3-AS1         | lncRNA  | -1.376285222 | 0.00595508  |
| AMIGO1           | mRNA    | -1.379627941 | 1.49E-04    |
| CCL2             | mRNA    | -1.380910249 | 0.023801502 |
| CRHBP            | mRNA    | -1.38472926  | 0.00767211  |
| EYS              | mRNA    | -1.385745053 | 2.76E-06    |
| PTPRD-AS1        | lncRNA  | -1.387020849 | 0.010677434 |
| FZD8             | mRNA    | -1.38737419  | 7.79E-06    |

|                  |         |              |             |
|------------------|---------|--------------|-------------|
| BGIG9606_37053   | lncRNA  | -1.390314246 | 0.010976071 |
| LINC00345        | lncRNA  | -1.390368471 | 2.48E-05    |
| LOC102724322     | lncRNA  | -1.39153012  | 1.68E-06    |
| LOC105377124     | lncRNA  | -1.395523593 | 0.009949483 |
| hsa_circ_0134100 | circRNA | -1.398709684 | 2.34E-04    |
| THBS1            | mRNA    | -1.401454724 | 0.003179779 |
| hsa_circ_0034486 | circRNA | -1.402163225 | 0.046858166 |
| C6orf132         | mRNA    | -1.406044458 | 0.014662171 |
| hsa_circ_0034499 | circRNA | -1.407263118 | 0.043090992 |
| hsa_circ_0034476 | circRNA | -1.407651693 | 0.03745765  |
| LOC105373150     | lncRNA  | -1.407673583 | 0.014029096 |
| THRB             | mRNA    | -1.409602424 | 2.16E-05    |
| hsa_circ_0034489 | circRNA | -1.410960052 | 0.040164139 |
| hsa_circ_0034438 | circRNA | -1.411364522 | 0.044374932 |
| hsa_circ_0034477 | circRNA | -1.411498555 | 0.038766012 |
| RNF219-AS1       | lncRNA  | -1.414500466 | 0.019611075 |
| ADSSL1           | mRNA    | -1.418140354 | 5.01E-06    |
| hsa_circ_0102594 | circRNA | -1.419538831 | 0.01389951  |
| hsa_circ_0034506 | circRNA | -1.420344135 | 0.045572613 |
| GRB14            | mRNA    | -1.420392436 | 5.76E-10    |
| hsa_circ_0105705 | circRNA | -1.421362088 | 3.20E-05    |
| CASKIN1          | mRNA    | -1.423685713 | 3.01E-06    |
| CDH11            | mRNA    | -1.423868835 | 1.45E-06    |
| hsa_circ_0075878 | circRNA | -1.423929851 | 1.09E-06    |
| LINC00886        | lncRNA  | -1.425385537 | 9.72E-04    |

|                  |         |              |             |
|------------------|---------|--------------|-------------|
| hsa_circ_0031262 | circRNA | -1.432043576 | 0.002295691 |
| hsa_circ_0010171 | circRNA | -1.434811125 | 0.004185228 |
| SLC25A34-AS1     | lncRNA  | -1.435852505 | 0.001975831 |
| ITM2C            | mRNA    | -1.436178439 | 3.51E-07    |
| AJUBA            | mRNA    | -1.437708308 | 3.76E-12    |
| hsa_circ_0034466 | circRNA | -1.437777752 | 0.024464143 |
| CXADR            | mRNA    | -1.439381534 | 6.74E-04    |
| hsa_circ_0034468 | circRNA | -1.440287939 | 0.043815    |
| FBLN1            | mRNA    | -1.441046502 | 1.35E-04    |
| hsa_circ_0048418 | circRNA | -1.441157241 | 1.50E-05    |
| SDC2             | mRNA    | -1.441650161 | 2.39E-04    |
| hsa_circ_0034487 | circRNA | -1.441910302 | 0.034298971 |
| hsa_circ_0034478 | circRNA | -1.444313171 | 0.048006277 |
| hsa_circ_0085011 | circRNA | -1.444700424 | 3.51E-06    |
| hsa_circ_0010172 | circRNA | -1.445442484 | 0.001893902 |
| hsa_circ_0131683 | circRNA | -1.446276483 | 7.14E-04    |
| hsa_circ_0110394 | circRNA | -1.448181848 | 6.56E-04    |
| hsa_circ_0034504 | circRNA | -1.449588929 | 0.03369194  |
| NXPH3            | mRNA    | -1.451362848 | 0.003331906 |
| NPAS1            | mRNA    | -1.452368774 | 0.028122249 |
| ITGA7            | mRNA    | -1.453720226 | 0.013843359 |
| FBLN5            | mRNA    | -1.455454484 | 1.29E-05    |
| hsa_circ_0034455 | circRNA | -1.455547574 | 0.027569847 |
| hsa_circ_0034518 | circRNA | -1.455669252 | 0.037670691 |
| NNAT             | mRNA    | -1.455875231 | 1.86E-05    |

|                  |         |              |             |
|------------------|---------|--------------|-------------|
| hsa_circ_0034513 | circRNA | -1.45670935  | 0.046374403 |
| hsa_circ_0034471 | circRNA | -1.457460636 | 0.03314835  |
| hsa_circ_0034429 | circRNA | -1.459834136 | 0.044608706 |
| LINC01354        | lncRNA  | -1.461870515 | 0.010154663 |
| hsa_circ_0034522 | circRNA | -1.462250171 | 0.045026768 |
| hsa_circ_0034525 | circRNA | -1.464932917 | 0.038389557 |
| hsa_circ_0081933 | circRNA | -1.465213434 | 3.60E-04    |
| hsa_circ_0034507 | circRNA | -1.46751686  | 0.006295721 |
| LINC02407        | lncRNA  | -1.46837321  | 2.40E-05    |
| hsa_circ_0034451 | circRNA | -1.468887303 | 0.030950515 |
| hsa_circ_0034500 | circRNA | -1.46891689  | 0.027181388 |
| hsa_circ_0034459 | circRNA | -1.469579109 | 0.021441401 |
| hsa_circ_0034491 | circRNA | -1.470145939 | 0.049519698 |
| MATN3            | mRNA    | -1.470950048 | 0.01077485  |
| CTF1             | mRNA    | -1.470968686 | 9.83E-09    |
| SYT16            | mRNA    | -1.472358647 | 0.00157032  |
| FBXO2            | mRNA    | -1.472497438 | 9.73E-04    |
| hsa_circ_0034450 | circRNA | -1.472947597 | 0.019779583 |
| hsa_circ_0034496 | circRNA | -1.473135096 | 0.017083401 |
| hsa_circ_0034457 | circRNA | -1.473693233 | 0.019950776 |
| hsa_circ_0034493 | circRNA | -1.474509368 | 0.03508714  |
| hsa_circ_0034511 | circRNA | -1.475011658 | 0.046740573 |
| hsa_circ_0034458 | circRNA | -1.475715464 | 0.017205248 |
| hsa_circ_0034452 | circRNA | -1.476993806 | 0.020712312 |
| MMP19            | mRNA    | -1.477227748 | 0.026841515 |

|                  |         |              |             |
|------------------|---------|--------------|-------------|
| DCAF12L1         | mRNA    | -1.477588017 | 1.49E-05    |
| hsa_circ_0034460 | circRNA | -1.478671389 | 0.019982278 |
| BGIG9606_47873   | lncRNA  | -1.478753372 | 0.048156252 |
| GUCY1B1          | mRNA    | -1.481612833 | 2.32E-04    |
| hsa_circ_0034539 | circRNA | -1.481928574 | 0.006830087 |
| BGIG9606_38067   | mRNA    | -1.482203305 | 0.03579455  |
| hsa_circ_0034524 | circRNA | -1.482640934 | 0.046844961 |
| GADD45B          | mRNA    | -1.484993268 | 1.25E-06    |
| hsa_circ_0110393 | circRNA | -1.485251145 | 4.43E-05    |
| hsa_circ_0034541 | circRNA | -1.485413448 | 0.032207739 |
| hsa_circ_0034534 | circRNA | -1.486981414 | 0.025441716 |
| hsa_circ_0034475 | circRNA | -1.487008633 | 0.046844961 |
| hsa_circ_0034433 | circRNA | -1.487814549 | 0.032029771 |
| hsa_circ_0034519 | circRNA | -1.489420393 | 0.015013211 |
| hsa_circ_0034453 | circRNA | -1.491856617 | 0.019290435 |
| CEP126           | mRNA    | -1.492597728 | 6.97E-10    |
| NRG1             | mRNA    | -1.493230211 | 8.50E-04    |
| LRCOL1           | mRNA    | -1.494291346 | 0.006975051 |
| hsa_circ_0034424 | circRNA | -1.495164929 | 0.035565357 |
| GNG7             | mRNA    | -1.496662393 | 3.58E-07    |
| hsa_circ_0034509 | circRNA | -1.498220578 | 0.00139125  |
| hsa_circ_0034498 | circRNA | -1.498324986 | 0.036622497 |
| PAK1             | mRNA    | -1.499503205 | 2.57E-09    |
| LINC00622        | lncRNA  | -1.502391854 | 3.05E-06    |
| hsa_circ_0034502 | circRNA | -1.502557635 | 0.025793774 |

|                  |         |              |             |
|------------------|---------|--------------|-------------|
| LOC105371934     | lncRNA  | -1.506925437 | 0.035808405 |
| hsa_circ_0034435 | circRNA | -1.507238093 | 0.024807331 |
| CTSV             | mRNA    | -1.509822744 | 0.017618328 |
| ANKRD18B         | mRNA    | -1.509904487 | 0.001302545 |
| hsa_circ_0034449 | circRNA | -1.510816366 | 0.020003806 |
| BGIG9606_47872   | lncRNA  | -1.513577526 | 0.045254572 |
| hsa_circ_0034420 | circRNA | -1.515347403 | 0.020133152 |
| hsa_circ_0034427 | circRNA | -1.517828387 | 0.036444725 |
| hsa_circ_0034456 | circRNA | -1.518670283 | 0.005978068 |
| ACSS3            | mRNA    | -1.51928277  | 0.006469895 |
| FRAS1            | mRNA    | -1.520301479 | 0.001280235 |
| RBP1             | mRNA    | -1.523439205 | 2.16E-12    |
| hsa_circ_0034508 | circRNA | -1.523781255 | 0.046873778 |
| PLLP             | mRNA    | -1.524835724 | 2.78E-08    |
| hsa_circ_0034474 | circRNA | -1.525256417 | 0.025335973 |
| KCNS1            | mRNA    | -1.525433085 | 8.48E-04    |
| MPP2             | mRNA    | -1.526079464 | 0.0011395   |
| IRF6             | mRNA    | -1.528085139 | 1.51E-04    |
| DOCK2            | mRNA    | -1.528695706 | 0.004337452 |
| hsa_circ_0034505 | circRNA | -1.528929309 | 0.009584518 |
| EPHX2            | mRNA    | -1.533091666 | 8.63E-06    |
| hsa_circ_0025563 | circRNA | -1.533157808 | 7.73E-07    |
| CLDN10           | mRNA    | -1.533769591 | 0.018594778 |
| FAM189A1         | mRNA    | -1.534043118 | 0.021786055 |
| hsa_circ_0078047 | circRNA | -1.535083547 | 0.001492593 |



|                  |         |              |             |
|------------------|---------|--------------|-------------|
| SDC1             | mRNA    | -1.537311977 | 2.97E-10    |
| CD38             | mRNA    | -1.541347014 | 3.00E-04    |
| hsa_circ_0034442 | circRNA | -1.541710178 | 0.023841572 |
| hsa_circ_0034461 | circRNA | -1.542551171 | 0.007239942 |
| hsa_circ_0034436 | circRNA | -1.542824188 | 0.02233544  |
| ZNF365           | mRNA    | -1.546893304 | 0.01706378  |
| hsa_circ_0034428 | circRNA | -1.548906646 | 0.026902807 |
| BGIG9606_48556   | mRNA    | -1.549786532 | 2.56E-04    |
| hsa_circ_0034533 | circRNA | -1.551502085 | 0.01126407  |
| hsa_circ_0034454 | circRNA | -1.552113834 | 0.019191424 |
| SELENOP          | mRNA    | -1.553661154 | 2.88E-04    |
| ENPP1            | mRNA    | -1.556261426 | 3.24E-04    |
| ADAM11           | mRNA    | -1.55885857  | 3.36E-05    |
| hsa_circ_0034537 | circRNA | -1.558914588 | 0.028762611 |
| hsa_circ_0034538 | circRNA | -1.559256823 | 0.017171743 |
| CTTNBP2          | mRNA    | -1.559822048 | 2.81E-04    |
| hsa_circ_0006885 | circRNA | -1.566401997 | 7.10E-06    |
| CASP17P          | pseudo  | -1.571408088 | 2.73E-08    |
| hsa_circ_0034434 | circRNA | -1.572582205 | 0.024745146 |
| FAM160A1         | mRNA    | -1.572754693 | 1.29E-06    |
| hsa_circ_0034469 | circRNA | -1.572909026 | 0.048783911 |
| RAB11FIP1        | mRNA    | -1.574693823 | 0.041295162 |
| hsa_circ_0034536 | circRNA | -1.57638812  | 0.015797859 |
| hsa_circ_0034443 | circRNA | -1.578041983 | 0.039895567 |
| BHLHE41          | mRNA    | -1.579476519 | 0.044983579 |

|                  |               |              |             |
|------------------|---------------|--------------|-------------|
| hsa_circ_0034485 | circRNA       | -1.580002803 | 0.040400383 |
| SEPT5-GP1BB      | lncRNA        | -1.580561226 | 8.70E-04    |
| DUSP15           | mRNA          | -1.583264342 | 4.88E-06    |
| hsa_circ_0034431 | circRNA       | -1.585962521 | 0.014553601 |
| hsa_circ_0034422 | circRNA       | -1.588493069 | 0.040301848 |
| BGIG9606_55370   | lncRNA        | -1.590986302 | 0.003628988 |
| hsa_circ_0034490 | circRNA       | -1.591223683 | 0.041768215 |
|                  | 112268452mRNA | -1.592851668 | 1.60E-04    |
| PPP1R3B          | mRNA          | -1.59496658  | 2.04E-07    |
| NAT8             | mRNA          | -1.5965514   | 0.008799099 |
| hsa_circ_0136869 | circRNA       | -1.602782524 | 0.001170387 |
| IL7R             | mRNA          | -1.605982661 | 0.002474204 |
| SOX2             | mRNA          | -1.613831746 | 6.63E-04    |
| hsa_circ_0067557 | circRNA       | -1.614071121 | 0.001986693 |
| hsa_circ_0034426 | circRNA       | -1.620130055 | 0.003402305 |
| hsa_circ_0039466 | circRNA       | -1.620256088 | 0.004648741 |
| FAP              | mRNA          | -1.621396116 | 0.019542533 |
| SH3BP1           | mRNA          | -1.631437427 | 2.21E-04    |
| DAAM2            | mRNA          | -1.634320136 | 8.40E-08    |
| hsa_circ_0079822 | circRNA       | -1.634711    | 2.60E-04    |
| LOC105370094     | lncRNA        | -1.635419451 | 0.014312369 |
| DCLK1            | mRNA          | -1.643467668 | 0.007355828 |
| PTX3             | mRNA          | -1.644087523 | 0.026987966 |
| SSTR1            | mRNA          | -1.644850452 | 0.00272915  |
| CGN              | mRNA          | -1.649079486 | 0.00773321  |

|                  |           |              |             |
|------------------|-----------|--------------|-------------|
| IL31RA           | mRNA      | -1.653266228 | 0.00810597  |
| FILIP1           | mRNA      | -1.656489468 | 2.31E-10    |
| GAS1             | mRNA      | -1.65778023  | 0.001982844 |
| COL14A1          | mRNA      | -1.660185417 | 0.038662619 |
| BGIG9606_50370   | lncRNA    | -1.666465351 | 0.006641705 |
| AATK             | mRNA      | -1.669496647 | 2.66E-05    |
| CXCL11           | mRNA      | -1.672871422 | 2.46E-04    |
| ANOS1            | mRNA      | -1.677704568 | 4.86E-04    |
| IRS2             | mRNA      | -1.678905896 | 3.15E-09    |
| SORBS1           | mRNA      | -1.679933332 | 0.029859852 |
| BGIG9606_39026   | lncRNA    | -1.682361171 | 0.019649265 |
| HTRA4            | mRNA      | -1.688335095 | 0.026939597 |
| hsa_circ_0034419 | circRNA   | -1.695196063 | 0.001857811 |
| IRS1             | mRNA      | -1.697389578 | 9.96E-04    |
| BAMBI            | mRNA      | -1.702774088 | 6.24E-10    |
| PNPLA7           | mRNA      | -1.703844522 | 3.86E-07    |
| CDKL2            | mRNA      | -1.704609793 | 6.88E-07    |
| IER3             | mRNA      | -1.707997257 | 2.39E-07    |
| hsa_circ_0051196 | circRNA   | -1.71375159  | 1.71E-15    |
| EDN1             | mRNA      | -1.715413452 | 0.028064113 |
|                  | 4-MarmRNA | -1.717364322 | 0.001719372 |
| hsa_circ_0034542 | circRNA   | -1.721399794 | 6.99E-05    |
| RAB26            | mRNA      | -1.724429298 | 0.001598482 |
| hsa_circ_0007279 | circRNA   | -1.726728894 | 0.023387812 |
| ANKRD1           | mRNA      | -1.728583885 | 0.013097233 |

|                  |         |              |             |
|------------------|---------|--------------|-------------|
| BEX2             | mRNA    | -1.732616566 | 9.44E-08    |
| INSYN2B          | mRNA    | -1.734012608 | 9.45E-10    |
| GCNT1            | mRNA    | -1.736536616 | 1.05E-04    |
| GPR146           | mRNA    | -1.739686752 | 1.83E-11    |
| hsa_circ_0051185 | circRNA | -1.740191694 | 0.006653129 |
| hsa_circ_0107820 | circRNA | -1.744337781 | 0.036371598 |
| TNFSF15          | mRNA    | -1.744625058 | 2.96E-04    |
| hsa_circ_0055922 | circRNA | -1.747188875 | 9.02E-05    |
| ELFN2            | mRNA    | -1.748162257 | 0.040785252 |
| GDF3             | mRNA    | -1.750393496 | 0.001993466 |
| LOC101927811     | lncRNA  | -1.751070734 | 0.002256086 |
| hsa_circ_0066470 | circRNA | -1.753886537 | 0.031814684 |
| MT1E             | mRNA    | -1.759481033 | 5.21E-07    |
| RND1             | mRNA    | -1.761746573 | 8.95E-07    |
| NUPR1            | mRNA    | -1.766464425 | 5.85E-05    |
| MAPK13           | mRNA    | -1.770940668 | 2.15E-10    |
| LOC105373381     | mRNA    | -1.775830966 | 0.003438782 |
| DCN              | mRNA    | -1.779140326 | 0.007794205 |
| RGN              | mRNA    | -1.78132721  | 0.015662256 |
| hsa_circ_0003271 | circRNA | -1.789234101 | 5.76E-23    |
| LOC100505501     | lncRNA  | -1.790230637 | 5.51E-13    |
| PDE3A            | mRNA    | -1.794871463 | 6.13E-05    |
| RAP1GAP          | mRNA    | -1.796743307 | 0.004912476 |
| UNC5B            | mRNA    | -1.803502279 | 6.81E-06    |
| TRPM3            | mRNA    | -1.806797996 | 0.014029096 |

|                  |         |              |             |
|------------------|---------|--------------|-------------|
| ADHFE1           | mRNA    | -1.818461125 | 2.82E-06    |
| LINC02188        | lncRNA  | -1.825144301 | 6.09E-05    |
| MOV10L1          | mRNA    | -1.827489835 | 0.005967476 |
| SPOCK3           | mRNA    | -1.829470501 | 0.007950494 |
| hsa_circ_0039467 | circRNA | -1.831475728 | 4.61E-09    |
| ENTPD8           | mRNA    | -1.832849817 | 0.00230598  |
| KLRG1            | mRNA    | -1.842123588 | 4.11E-05    |
| hsa_circ_0051182 | circRNA | -1.849032002 | 4.24E-05    |
| hsa_circ_0091746 | circRNA | -1.849068385 | 2.33E-13    |
| GYG2             | mRNA    | -1.856841049 | 0.006369056 |
| AXL              | mRNA    | -1.883074343 | 9.51E-14    |
| hsa_circ_0039465 | circRNA | -1.903227925 | 4.27E-08    |
| hsa_circ_0127834 | circRNA | -1.912739764 | 0.015321962 |
| MMP7             | mRNA    | -1.913537354 | 0.002093121 |
| hsa_circ_0019089 | circRNA | -1.914191333 | 0.025335973 |
| hsa_circ_0051189 | circRNA | -1.915048048 | 5.93E-10    |
| CYP39A1          | mRNA    | -1.921625073 | 9.68E-04    |
| hsa_circ_0091742 | circRNA | -1.924207364 | 8.48E-08    |
| CCDC80           | mRNA    | -1.925171225 | 9.21E-06    |
| hsa_circ_0051200 | circRNA | -1.931313898 | 1.42E-12    |
| CA4              | mRNA    | -1.940798723 | 0.007862533 |
| hsa_circ_0051165 | circRNA | -1.94537455  | 4.34E-21    |
| SOX5             | mRNA    | -1.949487847 | 2.00E-08    |
| COL11A1          | mRNA    | -1.949704586 | 0.00443253  |
| SEMA3G           | mRNA    | -1.953224157 | 6.13E-27    |

|                  |         |              |             |
|------------------|---------|--------------|-------------|
| hsa_circ_0051190 | circRNA | -1.958957625 | 1.92E-07    |
| COL8A1           | mRNA    | -1.961341499 | 0.006377407 |
| hsa_circ_0125602 | circRNA | -1.965790523 | 2.66E-05    |
| BGIG9606_52854   | lncRNA  | -1.977561307 | 0.038401489 |
| hsa_circ_0039471 | circRNA | -1.979168649 | 1.50E-08    |
| MIR217HG         | lncRNA  | -1.983429976 | 1.06E-04    |
| GDF7             | mRNA    | -1.987061935 | 0.006415827 |
| LOC112267886     | mRNA    | -1.988684268 | 0.036111656 |
| LINC01013        | lncRNA  | -1.990625337 | 0.014793721 |
| hsa_circ_0091741 | circRNA | -1.991204739 | 4.29E-15    |
| PDGFC            | mRNA    | -1.991563234 | 2.69E-08    |
| hsa_circ_0084717 | circRNA | -1.998488342 | 0.011673098 |
| hsa_circ_0025572 | circRNA | -2.004987584 | 0.001690223 |
| LOC105373989     | mRNA    | -2.005358136 | 0.008500912 |
| DBP              | mRNA    | -2.012854821 | 4.47E-12    |
| TMEM178A         | mRNA    | -2.013652586 | 0.017401456 |
| LOC107985555     | mRNA    | -2.014447644 | 0.004020862 |
| LOC102724687     | lncRNA  | -2.015734803 | 2.14E-04    |
| FAM13C           | mRNA    | -2.017687388 | 0.029301336 |
| AQP1             | mRNA    | -2.026239533 | 9.24E-10    |
| SLC44A5          | mRNA    | -2.026449536 | 4.98E-07    |
| BGIG9606_39257   | lncRNA  | -2.034544791 | 0.038455034 |
| BGN              | mRNA    | -2.034573912 | 2.82E-15    |
| hsa_circ_0103399 | circRNA | -2.064912801 | 1.18E-04    |
| BGIG9606_40202   | lncRNA  | -2.067025213 | 0.030489287 |

|                  |         |              |             |
|------------------|---------|--------------|-------------|
| MYLIP            | mRNA    | -2.072148448 | 1.45E-15    |
| LNX1             | mRNA    | -2.083606497 | 2.19E-06    |
| BGIG9606_50661   | lncRNA  | -2.085637262 | 0.002488902 |
| BGIG9606_42818   | lncRNA  | -2.088922941 | 1.48E-04    |
| XKRX             | mRNA    | -2.092461433 | 0.010215442 |
| hsa_circ_0039462 | circRNA | -2.100281004 | 1.72E-07    |
| CLEC10A          | mRNA    | -2.100839254 | 0.012726739 |
| hsa_circ_0039461 | circRNA | -2.103253126 | 1.00E-04    |
| ANKRD18A         | mRNA    | -2.105973855 | 9.34E-04    |
| LOC112268447     | lncRNA  | -2.130725807 | 3.59E-04    |
| LOC101929028     | lncRNA  | -2.135271721 | 8.61E-04    |
| BTK              | mRNA    | -2.14313788  | 3.70E-09    |
| SMIM1            | mRNA    | -2.145096717 | 3.02E-05    |
| LINC01235        | lncRNA  | -2.152274741 | 2.01E-04    |
| LOC105376159     | lncRNA  | -2.165864923 | 0.013387339 |
| VCAM1            | mRNA    | -2.16878104  | 3.28E-09    |
| CYP2S1           | mRNA    | -2.169843154 | 0.002146336 |
| hsa_circ_0039463 | circRNA | -2.172803742 | 2.87E-08    |
| MEIS1-AS2        | lncRNA  | -2.177619087 | 0.018212148 |
| GPRIN3           | mRNA    | -2.179843736 | 1.00E-10    |
| hsa_circ_0125601 | circRNA | -2.183619252 | 1.97E-06    |
| TENT5B           | mRNA    | -2.205454502 | 2.59E-04    |
| MGARP            | mRNA    | -2.20735617  | 1.40E-04    |
| ACE              | mRNA    | -2.216231722 | 1.05E-24    |
| UGT2A1           | mRNA    | -2.218805195 | 0.019650265 |

|                  |         |              |             |
|------------------|---------|--------------|-------------|
| HERC5            | mRNA    | -2.220795189 | 2.34E-22    |
| OGDHL            | mRNA    | -2.225472104 | 5.22E-06    |
| CXCL6            | mRNA    | -2.228295391 | 0.008204337 |
| ABCG1            | mRNA    | -2.229412687 | 1.51E-06    |
| BRWD1-AS1        | lncRNA  | -2.230544772 | 0.011065263 |
| ADAD2            | mRNA    | -2.236434687 | 0.001247978 |
| TGFB2            | mRNA    | -2.236926271 | 0.001511069 |
| BGIG9606_37598   | lncRNA  | -2.238873736 | 0.014734086 |
| DNAJC5G          | mRNA    | -2.241539579 | 0.01420731  |
| hsa_circ_0039460 | circRNA | -2.249046642 | 5.97E-09    |
| INHBA            | mRNA    | -2.256152705 | 4.06E-19    |
| hsa_circ_0091743 | circRNA | -2.277936321 | 1.47E-07    |
| GUCY1A1          | mRNA    | -2.28857314  | 1.05E-09    |
| ADAMTS12         | mRNA    | -2.298435674 | 9.21E-06    |
| LYPD1            | mRNA    | -2.302458199 | 0.038109026 |
| MT2A             | mRNA    | -2.310104815 | 2.35E-12    |
| AQP5             | mRNA    | -2.316600305 | 1.76E-05    |
| PGAM1P5          | pseudo  | -2.316897168 | 0.04045609  |
| BGIG9606_42940   | mRNA    | -2.325019749 | 0.040687383 |
| TNFSF18          | mRNA    | -2.328840043 | 8.27E-10    |
| INHBB            | mRNA    | -2.329167697 | 0.001488076 |
| LRRC4            | mRNA    | -2.333174976 | 5.75E-11    |
| LOC105375221     | lncRNA  | -2.33589861  | 0.00934573  |
| hsa_circ_0051195 | circRNA | -2.340528488 | 4.08E-19    |
| SULF1            | mRNA    | -2.346625054 | 1.86E-11    |



|                  |         |              |             |
|------------------|---------|--------------|-------------|
| MT1L             | pseudo  | -2.346818667 | 2.44E-06    |
| OLFML1           | mRNA    | -2.348478075 | 0.005043221 |
| RSPH10B2         | mRNA    | -2.350175358 | 0.040431306 |
| hsa_circ_0039459 | circRNA | -2.359723362 | 2.35E-10    |
| LOC100506851     | lncRNA  | -2.367773653 | 0.002035517 |
| KLF15            | mRNA    | -2.380961682 | 7.63E-08    |
| PLXNA4           | mRNA    | -2.38127938  | 0.001529997 |
| LOC100506258     | lncRNA  | -2.381524091 | 7.70E-13    |
| FMO3             | mRNA    | -2.407128756 | 0.037296738 |
| PPFIBP2          | mRNA    | -2.418888535 | 3.77E-17    |
| hsa_circ_0085019 | circRNA | -2.422251659 | 0.045327291 |
| NOTCH3           | mRNA    | -2.432825758 | 4.30E-11    |
| ANKRD2           | mRNA    | -2.432922175 | 0.011216986 |
| BGIG9606_46646   | lncRNA  | -2.451596459 | 0.00145404  |
| SERPINB2         | mRNA    | -2.453089296 | 5.52E-06    |
| RSPH10B          | mRNA    | -2.46494055  | 2.48E-05    |
| ELMOD1           | mRNA    | -2.467062334 | 3.53E-12    |
| TLL1             | mRNA    | -2.469345952 | 0.005013335 |
| PKNOX2           | mRNA    | -2.476278909 | 1.71E-09    |
| RRN3P3           | pseudo  | -2.485632716 | 0.017618328 |
| CPA3             | mRNA    | -2.498106152 | 2.37E-05    |
| hsa_circ_0084719 | circRNA | -2.500887341 | 2.31E-07    |
| EPHB6            | mRNA    | -2.51053817  | 1.80E-04    |
| DSC2             | mRNA    | -2.514350279 | 1.66E-05    |
| LOC102724122     | lncRNA  | -2.515158791 | 0.007534247 |

|                |        |              |             |
|----------------|--------|--------------|-------------|
| PTH1R          | mRNA   | -2.527843726 | 0.01066793  |
| SPDYE8P        | pseudo | -2.528808681 | 0.015468118 |
| APCDD1L-DT     | lncRNA | -2.532181939 | 1.54E-04    |
| CIART          | mRNA   | -2.538789923 | 3.89E-08    |
| CLDN11         | mRNA   | -2.554801974 | 4.52E-09    |
| TMEFF2         | mRNA   | -2.566828742 | 0.005815936 |
| RHBDL3         | mRNA   | -2.56717906  | 0.032985618 |
| TOX            | mRNA   | -2.582752484 | 4.82E-49    |
| LRRC17         | mRNA   | -2.612677083 | 1.53E-38    |
| BGIG9606_42073 | lncRNA | -2.645977118 | 0.043886527 |
| FAT3           | mRNA   | -2.651304834 | 0.014028003 |
| PDE1A          | mRNA   | -2.707289687 | 3.10E-04    |
| COL12A1        | mRNA   | -2.707312706 | 9.77E-04    |
| HCP5           | lncRNA | -2.719553462 | 0.011138188 |
| SEPT4          | mRNA   | -2.734054791 | 0.014386906 |
| PCSK1          | mRNA   | -2.752630387 | 1.28E-07    |
| WIPF3          | mRNA   | -2.759369106 | 0.005860427 |
| FST            | mRNA   | -2.764088166 | 0.006526503 |
| NEGR1          | mRNA   | -2.765288465 | 1.32E-07    |
| NPR3           | mRNA   | -2.766865407 | 3.72E-05    |
| ADAMTS15       | mRNA   | -2.788634803 | 2.22E-04    |
| BGIG9606_54773 | mRNA   | -2.793310065 | 0.002367281 |
| LOC105373454   | lncRNA | -2.808762521 | 0.002477977 |
| PRSS35         | mRNA   | -2.84606675  | 0.048224609 |
| SERPIND1       | mRNA   | -2.865381561 | 5.93E-06    |

|                  |         |              |             |
|------------------|---------|--------------|-------------|
| PTPN22           | mRNA    | -2.88240385  | 5.62E-04    |
| ANK3             | mRNA    | -2.897291465 | 1.09E-09    |
| ADTRP            | mRNA    | -2.920863938 | 7.48E-06    |
| PARD6B           | mRNA    | -2.933387351 | 0.015799752 |
| LINC01592        | lncRNA  | -2.937023634 | 0.013778934 |
| LOC101928358     | lncRNA  | -2.944631996 | 0.018239069 |
| GPM6A            | mRNA    | -2.972532316 | 4.93E-08    |
| HMCN2            | mRNA    | -2.998974283 | 0.002764756 |
| KCNJ6            | mRNA    | -3.013736318 | 0.017474584 |
| LOC105376196     | lncRNA  | -3.032573696 | 4.27E-04    |
| XXYLT1-AS2       | lncRNA  | -3.03875346  | 8.11E-08    |
| LOC105372814     | lncRNA  | -3.073045129 | 7.32E-07    |
| SLC7A14          | mRNA    | -3.101592682 | 0.001117808 |
| BCL2A1           | mRNA    | -3.11612178  | 0.026946583 |
| ABCA1            | mRNA    | -3.157034972 | 4.12E-04    |
| hsa_circ_0042033 | circRNA | -3.219421554 | 0.040164927 |
| STAT4            | mRNA    | -3.249632835 | 5.55E-09    |
| LOC101927057     | lncRNA  | -3.251191363 | 1.47E-06    |
| BGIG9606_43129   | lncRNA  | -3.284716826 | 0.030331333 |
| hsa_circ_0066056 | circRNA | -3.298999317 | 0.030365914 |
| RGS4             | mRNA    | -3.312961624 | 2.11E-13    |
| CYSLTR2          | mRNA    | -3.335759754 | 0.009342162 |
| ANGPTL5          | mRNA    | -3.33985893  | 0.042868647 |
| LOC101928202     | lncRNA  | -3.346317938 | 0.00114172  |
| BGIG9606_46936   | lncRNA  | -3.375842214 | 0.001708529 |

|                |        |              |             |
|----------------|--------|--------------|-------------|
| BGIG9606_54793 | lncRNA | -3.392214973 | 0.006634107 |
| PNCK           | mRNA   | -3.423269965 | 0.031418248 |
| CDH6           | mRNA   | -3.434680527 | 2.48E-04    |
| KRT80          | mRNA   | -3.444150849 | 2.13E-13    |
| PLIN5          | mRNA   | -3.488491665 | 3.30E-07    |
| DKK1           | mRNA   | -3.541727013 | 2.83E-08    |
| PIFO           | mRNA   | -3.546602833 | 4.13E-05    |
| IRS4           | mRNA   | -3.592898015 | 0.009568072 |
| LINGO2         | mRNA   | -3.664742854 | 3.97E-06    |
| KCNH7          | mRNA   | -3.690681749 | 1.66E-05    |
| CD207          | mRNA   | -3.72551664  | 0.045067107 |
| MT1A           | mRNA   | -3.946744595 | 6.49E-05    |
| LOC102724880   | lncRNA | -3.947429236 | 0.049022729 |
| GJA5           | mRNA   | -3.982066239 | 1.72E-05    |
| BGIG9606_68341 | mRNA   | -4.101734863 | 1.97E-04    |
| LOC107984113   | lncRNA | -4.158288167 | 0.037606746 |
| DAW1           | mRNA   | -4.164228402 | 1.46E-12    |
| SCNN1B         | mRNA   | -4.330702925 | 6.76E-05    |
| BGIG9606_43492 | mRNA   | -4.376755036 | 2.86E-08    |
| BGIG9606_51068 | lncRNA | -4.40771238  | 0.041483545 |
| GPC4           | mRNA   | -4.4886118   | 0.006083201 |
| FBP2           | mRNA   | -4.495145362 | 0.00272915  |
| BGIG9606_54519 | lncRNA | -4.642753894 | 0.041809578 |
| GJA4           | mRNA   | -4.649628788 | 5.46E-11    |
| CNTN6          | mRNA   | -4.65502862  | 0.043946723 |

|                  |         |              |             |
|------------------|---------|--------------|-------------|
| MYEOV            | mRNA    | -4.718812444 | 9.13E-05    |
| BGIG9606_54103   | lncRNA  | -4.988095643 | 0.048442598 |
| PRND             | mRNA    | -5.013233123 | 4.40E-15    |
| LOC107986566     | lncRNA  | -5.182812867 | 4.18E-04    |
| FSTL5            | mRNA    | -5.262562982 | 0.008155414 |
| ZDHH8P1          | pseudo  | -5.427632978 | 1.13E-08    |
| KRT7             | mRNA    | -5.509809907 | 8.42E-08    |
| VIT              | mRNA    | -5.597915337 | 6.87E-05    |
| BGIG9606_52767   | lncRNA  | -5.654217504 | 0.001022151 |
| ITPR1D1          | mRNA    | -5.727542638 | 0.007401488 |
| LOC105376603     | lncRNA  | -5.799397352 | 2.13E-05    |
| LOC100507642     | lncRNA  | -5.937358719 | 0.004656267 |
| SCNN1G           | mRNA    | -6.027882782 | 8.16E-05    |
| hsa_circ_0127636 | circRNA | -6.223360307 | 0.03988616  |
| hsa_circ_0015684 | circRNA | -6.226277579 | 0.039945557 |
| hsa_circ_0098223 | circRNA | -6.240561368 | 0.036372042 |
| hsa_circ_0120231 | circRNA | -6.246933091 | 0.036292609 |
| hsa_circ_0003633 | circRNA | -6.256042991 | 0.033076375 |
| hsa_circ_0081823 | circRNA | -6.274780686 | 0.029639845 |
| hsa_circ_0079442 | circRNA | -6.281238984 | 0.028866526 |
| hsa_circ_0137311 | circRNA | -6.284511549 | 0.028463571 |
| hsa_circ_0000087 | circRNA | -6.291443699 | 0.027373375 |
| hsa_circ_0125606 | circRNA | -6.292203115 | 0.026485773 |
| hsa_circ_0133123 | circRNA | -6.294843906 | 0.026172486 |
| hsa_circ_0120633 | circRNA | -6.300784198 | 0.025770124 |

|                  |         |              |             |
|------------------|---------|--------------|-------------|
| hsa_circ_0066299 | circRNA | -6.311179969 | 0.024011174 |
| hsa_circ_0040395 | circRNA | -6.335716854 | 0.020670157 |
| hsa_circ_0022267 | circRNA | -6.33650927  | 0.019832587 |
| hsa_circ_0066064 | circRNA | -6.337217649 | 0.020050771 |
| hsa_circ_0131562 | circRNA | -6.337658873 | 0.02046482  |
| hsa_circ_0115927 | circRNA | -6.358870792 | 0.018783401 |
| hsa_circ_0110383 | circRNA | -6.368525704 | 0.016570356 |
| hsa_circ_0089967 | circRNA | -6.369264789 | 0.016453947 |
| hsa_circ_0004391 | circRNA | -6.369419778 | 0.016453947 |
| hsa_circ_0005769 | circRNA | -6.369419778 | 0.016453947 |
| hsa_circ_0039645 | circRNA | -6.378342522 | 0.0146839   |
| hsa_circ_0138993 | circRNA | -6.382062283 | 0.014359458 |
| hsa_circ_0115452 | circRNA | -6.382618407 | 0.014800208 |
| hsa_circ_0025231 | circRNA | -6.383609565 | 0.014617338 |
| hsa_circ_0063528 | circRNA | -6.403411188 | 0.012249447 |
| hsa_circ_0004325 | circRNA | -6.410179971 | 0.041070799 |
| hsa_circ_0098645 | circRNA | -6.411574924 | 0.011844723 |
| hsa_circ_0010024 | circRNA | -6.411876172 | 0.011953239 |
| hsa_circ_0098215 | circRNA | -6.415611908 | 0.011195558 |
| hsa_circ_0061823 | circRNA | -6.416640908 | 0.040228232 |
| hsa_circ_0090098 | circRNA | -6.420370704 | 0.011198979 |
| hsa_circ_0059497 | circRNA | -6.428659762 | 0.037292408 |
| hsa_circ_0127253 | circRNA | -6.431660236 | 0.009822201 |
| hsa_circ_0072041 | circRNA | -6.442552776 | 0.009160542 |
| hsa_circ_0125607 | circRNA | -6.443105262 | 0.008949684 |

|                  |         |              |             |
|------------------|---------|--------------|-------------|
| hsa_circ_0092498 | circRNA | -6.444895877 | 0.034958343 |
| hsa_circ_0081207 | circRNA | -6.454861049 | 0.032029771 |
| hsa_circ_0035049 | circRNA | -6.470719771 | 0.007173399 |
| hsa_circ_0095280 | circRNA | -6.481378494 | 0.029023172 |
| hsa_circ_0081113 | circRNA | -6.506044758 | 0.005317566 |
| hsa_circ_0059519 | circRNA | -6.507080513 | 0.023853076 |
| hsa_circ_0089563 | circRNA | -6.52859676  | 0.004541696 |
| hsa_circ_0069308 | circRNA | -6.53459587  | 0.019237932 |
| CPA4             | mRNA    | -6.542345534 | 1.65E-06    |
| hsa_circ_0100407 | circRNA | -6.54709989  | 0.018389717 |
| hsa_circ_0113440 | circRNA | -6.57980142  | 0.002737533 |
| hsa_circ_0138444 | circRNA | -6.598713157 | 0.002462866 |
| hsa_circ_0006874 | circRNA | -6.599898871 | 0.00247468  |
| hsa_circ_0034237 | circRNA | -6.622584813 | 0.001751817 |
| hsa_circ_0087803 | circRNA | -6.628353719 | 0.010201429 |
| hsa_circ_0081116 | circRNA | -6.669265495 | 0.001111378 |
| hsa_circ_0099254 | circRNA | -6.688375198 | 9.04E-04    |
| hsa_circ_0113446 | circRNA | -6.691305475 | 9.02E-04    |
| hsa_circ_0136474 | circRNA | -6.716491759 | 6.71E-04    |
| hsa_circ_0001368 | circRNA | -6.719157687 | 5.59E-04    |
| SEMA5B           | mRNA    | -6.720343004 | 3.97E-06    |
| hsa_circ_0090099 | circRNA | -6.764505104 | 4.14E-04    |
| hsa_circ_0049059 | circRNA | -6.823281858 | 1.79E-04    |
| hsa_circ_0072759 | circRNA | -6.849620962 | 1.50E-04    |
| hsa_circ_0084722 | circRNA | -6.863182348 | 1.56E-04    |

|                  |         |              |          |
|------------------|---------|--------------|----------|
| hsa_circ_0008864 | circRNA | -6.877755141 | 9.34E-05 |
| hsa_circ_0051179 | circRNA | -6.903701089 | 5.91E-05 |
| hsa_circ_0137612 | circRNA | -6.944024035 | 3.94E-05 |
| hsa_circ_0026362 | circRNA | -6.958521418 | 7.97E-05 |
| hsa_circ_0084720 | circRNA | -7.02637242  | 1.33E-05 |
| hsa_circ_0109177 | circRNA | -7.107820237 | 4.15E-06 |
| hsa_circ_0001725 | circRNA | -7.11696547  | 2.76E-06 |
| hsa_circ_0026369 | circRNA | -7.218841095 | 2.26E-06 |
| hsa_circ_0103603 | circRNA | -7.261601534 | 7.14E-07 |
| hsa_circ_0013450 | circRNA | -7.343776111 | 1.27E-07 |
| CCDC190          | mRNA    | -7.399882895 | 2.39E-08 |
| hsa_circ_0084721 | circRNA | -7.405645122 | 8.64E-08 |
| hsa_circ_0087818 | circRNA | -7.529585044 | 2.94E-08 |
| hsa_circ_0026368 | circRNA | -7.529874285 | 5.93E-08 |
| hsa_circ_0026360 | circRNA | -7.779253626 | 3.83E-06 |
